# Supplementary material for: Global and regional cancer burden attributable to modifiable risk factors in 2022: Evidence to guide cancer prevention
Source: Research Square preprint supplement (doi:10.21203/rs.3.rs-8000310/v1), 2025-11-04
Supplement: Supplementary file 1 [file 2015e197998015ff2bcbc279.docx]

Contents

[1 Cancer incidence data 2](#_Toc212763019)

[2 Risk factor prevalence data 2](#_Toc212763020)

[3 Relative risks 6](#_Toc212763021)

[4 Statistical method for PAF estimation by risk factor 15](#_Toc212763022)

[4.1 Tobacco Smoking 15](#_Toc212763023)

[4.2 Alcohol Consumption 15](#_Toc212763024)

[4.3 High Body Mass Index 16](#_Toc212763025)

[4.4 Insufficient Physical Activity 16](#_Toc212763026)

[4.5 Smokeless Tobacco and Areca Nut 16](#_Toc212763027)

[4.6 Suboptimal Breastfeeding 17](#_Toc212763028)

[4.7 Air Pollution 17](#_Toc212763029)

[4.8 Ultraviolet radiation 17](#_Toc212763030)

[4.9 Infectious agents 18](#_Toc212763031)

[4.10 Occupational exposures 18](#_Toc212763032)

[5 Results by risk factor and cancer site 20](#_Toc212763033)

[5.1 Total PAFs by country and sex 20](#_Toc212763034)

[5.2 Tobacco Smoking 28](#_Toc212763035)

[5.3 Alcohol consumption 46](#_Toc212763036)

[5.4 High Body Mass Index 61](#_Toc212763037)

[5.5 Insufficient physical activity 78](#_Toc212763038)

[5.6 Smokeless Tobacco and Areca Nut 85](#_Toc212763039)

[5.7 Suboptimal breastfeeding 88](#_Toc212763040)

[5.8 Air pollution 91](#_Toc212763041)

[5.9 Ultraviolet radiation 94](#_Toc212763042)

[5.10 Infectious agents 97](#_Toc212763043)

[5.11 Occupational exposures 116](#_Toc212763044)

[6 References 127](#_Toc212763045)

# Cancer incidence data

The number of new cancer cases was obtained from the GLOBOCAN 2022 database 1. GLOBOCAN provides age- and sex-specific incidence estimates for 36 cancer types across all countries worldwide. Incidence estimates were directly available from GLOBOCAN 2022 for 36 cancer sites associated with the 30 selected modifiable risk factors considered in this study, namely cancers of the lip, oral cavity (C00-C06), salivary glands (C07-C08), oropharynx (C09-C10), nasopharynx (C11), hypopharynx (C12-C13), oesophagus (C15), stomach (C16), colon (C18), rectum (C19), anus (C21), liver and intrahepatic bile ducts (C22), gallbladder (C23), pancreas (C25), larynx (C32), trachea, bronchus and lung (C33–C34), melanoma of skin (C43), mesothelioma (C45), Kaposi sarcoma (C46), breast (C50), vulva (C51), vagina (C52), cervix uteri (C53), corpus uteri (C54), ovary (C56), penis (C60), kidney (C64), bladder (C67), Hodgkin lymphoma (C81), non-Hodgkin lymphoma (C82–C85, C96), multiple myeloma (C90) and leukaemia (C91-C95).

Some cancers associated with the selected risk factors were grouped with other cancer sites in broader GLOBOCAN categories. Specifically, oesophagus (adenocarcinoma and squamous cell carcinoma) was grouped under oesophagus, stomach (cardia and non-cardia) was grouped under stomach, anus (squamous cell carcinoma) was grouped under anus, liver (hepatocellular) and cholangiocarcinoma was grouped under liver and intrahepatic bile ducts, ovary (mucinous) was grouped under ovary, non-Hodgkin lymphoma (gastric location) and Burkitt lymphoma was grouped under non-Hodgkin lymphoma, and adult t-cell leukaemia and lymphoma was grouped under leukaemia. Oropharyngeal sites, including tonsil and base of tongue (C01, C09–C10), were grouped under “lip, oral cavity” (C00–C08) and “other pharynx” (C09–C10, C12–C14) categories. Similarly, oral cavity sites (C02–C06) were included under “lip, oral cavity” (C00–C08).

To estimate the proportions and numbers of specific cancer sites or histological subtypes, data from Cancer Incidence in Five Continents, Volume XII (CI5-XII), detailed coding (CI5-Xd), were used. Cancers by histological subtype (e.g., oesophageal squamous cell carcinoma and oesophageal adenocarcinoma), anatomic subsite (e.g., gastric cardia (C16.0) and non-cardia (C16.1–C16.7)), or specific microscopically verified types (e.g., Burkitt lymphoma (C83.7), gastric lymphoma (C88.4), and adult T-cell leukaemia (C91.5)) were restricted to registries with the highest standard of data quality for the corresponding information 2.

Where detailed registry data were available, these were aggregated to obtain overall proportions by cancer site or subtype at the global level. In areas without adequate registry coverage, proportions were derived from aggregated data across available registries within the same global regions as defined by the United Nations classification of populations used in GLOBOCAN 2022. The total number of cancer cases for each specific cancer site or histological subtype was then calculated by multiplying these proportions by the total global incidence reported in GLOBOCAN 2022.

# Risk factor prevalence data

Prevalence data for the selected modifiable risk factors in 185 countries globally were obtained from publicly available international databases, including those of the World Health Organization (WHO), the NCD Risk Factor Collaboration (NCD-RisC), and the United Nations Children’s Fund (UNICEF), as well as from relevant published literature. Data were selected to ensure comparability across countries and consistency with the global exposure estimates used in the main analysis. The data sources, definitions, and reference years for each risk factor are summarized in Table 2.1.

**Table 2.1. Sources of the risk factor prevalence**

| Risk Factor Type | Risk Factor | Measurement | Age Groups | Source of Prevalence Data |
| --- | --- | --- | --- | --- |
| Behavioural | Tobacco Smoking | Pack-years | All ages | Explained in GBD, 2021 3 |
|  | Alcohol consumption | In g/day | All ages | GISAH, WHO 4 |
|  | High body mass index | In kg/m2 | 30+ | NCD Risk Factor Collaboration 5 |
|  | Insufficient Physical Activity | Proportion of population | 18+ | Global Health Observatory, WHO 6 |
|  | Smokeless tobacco and areca nut | Proportion of population | 15+ | Global Adult Tobacco Survey (GATS), STEPwise approach to non-communicable disease risk factor surveillance (STEPs), Demographic Household Survey, Multiple Indicator Cluster Surveys, national tobacco or health surveys, summarized in Rumgay et al., 2024 7 |
|  | Suboptimal breastfeeding | In months | 20+ | UNICEF 8 |
| Environmental | Air pollution | PM2.5; in µg/m3 | All ages | Global Health Observatory, WHO 9 |
|  | Ultraviolet radiation | Incidence | 30+ | Age- and sex-specific melanoma incidence rates were compared to that of a theoretically minimally exposed Nordic 1930 birth cohort. Incidence rates were adjusted to exclude the non-UVR related acral lentiginous melanoma subtype, explained in Langselius et al., 2025 10 |
| Infections |  | Prevalence of infection in cancer cases | All ages | Plummer et al., 2016 11 |
| Occupational |  | Proportion above background level | 20+ | ILO, WHO 12 |

Data on smoking prevalence were extracted from 3,625 nationally representative surveys, covering 200 of 204 countries and territories. Of these, 171 countries had at least five surveys from 1980–2019, and 141 countries had data from 2015 or later. Data for individuals aged 10–14 informed model estimates, but prevalence is reported for those aged 15 and older. For countries without survey data, estimates were entirely model based. Surveys reporting non-reference case definitions were adjusted via linear regression. Reference definitions included current or former use of any smoked tobacco product (e.g., cigarettes, pipes, cigars, shisha, bidis, kreteks), excluding smokeless tobacco, e-cigarettes, vaping, and heated tobacco products. Aggregated age groups and both-sex data were split into standard 5-year age-sex groups using preliminary models to propagate uncertainty. Prevalence was modeled using spatiotemporal Gaussian process regression (ST-GPR). The three-stage approach first estimated trends using linear regression with covariates, then adjusted residuals across time, age, and location, and finally refined estimates with Gaussian process regression incorporating data and model uncertainty. One thousand draws from the posterior distribution were retained, and results are reported with 95% uncertainty intervals. Further details can be found elsewhere 3.

Alcohol consumption was modelled as a continuous exposure variable, expressed in grams of pure alcohol consumed per person per day. Age- and sex-specific alcohol consumption data were obtained from the Global Information System on Alcohol and Health (GISAH) for the year 2010, assuming a 10-year latency period between exposure and cancer diagnosis 13. The modelling approach followed the methodology developed by Rehm, Kehoe, and colleagues 14,15, which combines survey-based data with per capita alcohol consumption estimates from GISAH to adjust for the systematic undercoverage of alcohol intake in population surveys 16. Individuals were categorized as current drinkers (consumed alcohol within the past year), former drinkers (consumed alcohol in the past but not within the past year), or lifetime abstainers (never consumed at least one standard alcoholic drink). Alcohol intake among current drinkers was modelled continuously by grams per day, using lifetime abstention as the theoretical minimum-risk exposure level.

Overweight and obesity prevalence was estimated using measured height and weight data, expressed as body mass index (BMI; kg/m²). Data were obtained from the NCD Risk Factor Collaboration (NCD-RisC), which included 3,663 population-based studies with 222 million adult participants, measuring height and weight in representative samples of the general population 17. Age-, sex-, and country-specific estimates of mean BMI and standard error were obtained from NCD-RisC for adults (age ≥20 years) across 200 countries and territories. For the population-attributable fraction (PAF) calculations, the theoretical minimum BMI distribution was set at a mean of 22 kg/m² with a standard deviation of 1. A detailed description of the BMI prevalence data sources, modelling approach, and PAF methodology has been published elsewhere 18.

Prevalence of insufficient physical activity was obtained from the World Health Organization (WHO) Global Health Observatory Data Repository 19, including estimates from nationally representative surveys such as STEPS Noncommunicable Disease Risk Factor Surveys and the World Health Survey. Insufficient physical activity was defined as the proportion of adults achieving less than 150 minutes of moderate-intensity activity per week, less than 75 minutes of vigorous-intensity activity per week, or an equivalent combination. Age-standardized estimates for men and women aged 18 years and older were extracted for the year 2012. Data were derived from self-reported physical activity using the Global Physical Activity Questionnaire (GPAQ), the International Physical Activity Questionnaire (IPAQ), or similar instruments, capturing activity across work, household, transport, and leisure domains.

Data on the prevalence of current smokeless tobacco and areca nut use among adults were obtained, where available, from nationally representative surveys such as the Global Adult Tobacco Survey (GATS), the WHO STEPwise Approach to Noncommunicable Disease Risk Factor Surveillance (STEPS), Demographic and Health Surveys (DHS), Multiple Indicator Cluster Surveys (MICS), and national tobacco or health surveys. When multiple data sources were available for a given country, estimates stratified by sex and selected the survey year closest to 2012 to account for the latency period between smokeless tobacco exposure and cancer incidence were prioritized. Survey instruments varied across countries, as questionnaires referred to locally relevant products (e.g., betel quid with tobacco, khaini, sada or surti, snuff, or chewing tobacco). Prevalence data were available for most countries, with missing data imputed using estimates from neighbouring countries or regions. Further details on data sources and methods can be found elsewhere 7.

Breastfeeding prevalence was obtained from the UNICEF database on breastfeeding 20 and defined as the proportion of children receiving continued breastfeeding between 12 and 23 months. This definition reflects evidence that the protective effects of breastfeeding against breast cancer are observed when breastfeeding is sustained for a duration exceeding six months. Prevalence estimates were based on nationally representative surveys, including Demographic and Health Surveys (DHS) and Multiple Indicator Cluster Surveys (MICS). For countries with missing data, regional or global estimates reported by UNICEF were used.

Infection prevalence was assessed as the proportion of cancer cases positive for the infection, rather than population-level prevalence. Estimates were obtained from international literature and summarized by Plummer et al., where further methodological details can be found 11.

Exposure to air pollution was measured using fine particulate matter (PM2.5) concentrations, expressed in µg/m³. Annual mean population-weighted PM2.5 concentrations were obtained from the World Health Organization Global Health Observatory (WHO GHO) for the year 2012 21. Estimates were based on high-quality measurements from fixed-site, population-oriented monitors in urban, rural, and other relevant areas, with data averaged across monitors to generate a single exposure value per area.

Ultraviolet radiation (UVR) exposure prevalence was assessed indirectly using the population attributable fraction (PAF) approach for cutaneous melanoma (CM), which assumes UVR is the primary cause of CM and that incidence is negligible in its absence. Excess CM incidence above a theoretical minimum is attributed to UVR, based on age- and sex-specific incidence rates from a minimally exposed reference population. This reference population was derived from high-latitude countries with low ambient UVR exposure and limited historical sun exposure. Incidence rates were modeled to represent an early 20th-century birth cohort, providing a theoretical minimum for PAF calculations. Further methodological details and sensitivity analyses are reported elsewhere 10.

Occupational exposure prevalence was obtained from the WHO-ILO occupational database, which includes data reported in the WHO/ILO Global Monitoring Report and scientific publications 22,23. Exposure estimates are based on direct measurements and modelling, using an established multilevel approach to predict the geographical and temporal prevalence of occupational exposures, such as long working hours. An exposure window of 10 years, centered around a lag time of 10 years, was applied (e.g., to estimate disease burden in 2016, exposure was modelled for 2001–2010), and annual prevalence values within this window were used in the modelling. Further methodological details, assumptions, and sensitivity analyses are reported elsewhere 24.

# Relative risks

Relative risk (RR) estimates for each risk factor–cancer pair were obtained from published meta-analyses. Behavioural risk factor RRs are presented in Table 3.1, environmental risk factor RRs in Table 3.2, infection-related RRs in Table 3.3, and occupational risk factor RRs in Table 3.4. These RRs were applied in the population-attributable fraction (PAF) calculations to estimate the proportion of cancer cases attributable to each risk factor.

**Table 3.1.** Relative risks (RR) and corresponding 95% confidence interval (95%-CI) by cancer site associated with behavioural risk factors

| **Risk Factor** | **Cancer Site** | **Exposure level/Region** | **Relative Risk (95% CI)** | | **Source** |
| --- | --- | --- | --- | --- | --- |
|  |  |  | Men | Women |  |
| Tobacco Smoking | Lip and oral cavity | 1 Pack-Years | 1.12 (1.07-1.19) | 1.12 (1.07-1.19) | Reitsma, 2021 25 |
|  |  | 5 Pack-Years | 1.62 (1.33-1.95) | 1.62 (1.33-1.95) | Reitsma, 2021 25 |
|  |  | 10 Pack-Years | 2.24 (1.66-2.90) | 2.24 (1.66-2.90) | Reitsma, 2021 25 |
|  |  | 20 Pack-Years | 3.26 (2.42-4.22) | 3.26 (2.42-4.22) | Reitsma, 2021 25 |
|  |  | 40 Pack-Years | 3.82 (2.80-4.98) | 3.82 (2.80-4.98) | Reitsma, 2021 25 |
|  |  | 60 Pack-Years | 4.60 (3.09-6.50) | 4.60 (3.09-6.50) | Reitsma, 2021 25 |
|  | Oesophagus | 1 Pack-Years | 1.14 (1.09-1.19) | 1.14 (1.09-1.19) | Reitsma, 2021 25 |
|  |  | 5 Pack-Years | 1.68 (1.44-1.94) | 1.68 (1.44-1.94) | Reitsma, 2021 25 |
|  |  | 10 Pack-Years | 2.36 (1.88-2.88) | 2.36 (1.88-2.88) | Reitsma, 2021 25 |
|  |  | 20 Pack-Years | 2.95 (2.45-3.44) | 2.95 (2.45-3.44) | Reitsma, 2021 25 |
|  |  | 40 Pack-Years | 3.91 (3.09-4.79) | 3.91 (3.09-4.79) | Reitsma, 2021 25 |
|  |  | 60 Pack-Years | 5.33 (2.86-8.23) | 5.33 (2.86-8.23) | Reitsma, 2021 25 |
|  | Stomach | 1 Pack-Years | 1.03 (1.01-1.06) | 1.03 (1.01-1.06) | Reitsma, 2021 25 |
|  |  | 5 Pack-Years | 1.17 (1.07-1.29) | 1.17 (1.07-1.29) | Reitsma, 2021 25 |
|  |  | 10 Pack-Years | 1.34 (1.15-1.57) | 1.34 (1.15-1.57) | Reitsma, 2021 25 |
|  |  | 20 Pack-Years | 1.53 (1.32-1.78) | 1.53 (1.32-1.78) | Reitsma, 2021 25 |
|  |  | 40 Pack-Years | 1.94 (1.58-2.33) | 1.94 (1.58-2.33) | Reitsma, 2021 25 |
|  |  | 60 Pack-Years | 2.08 (1.74-2.44) | 2.08 (1.74-2.44) | Reitsma, 2021 25 |
|  | Colon and rectum | 1 Pack-Years | 1.03 (1.01-1.05) | 1.03 (1.01-1.05) | Reitsma, 2021 25 |
|  |  | 5 Pack-Years | 1.13 (1.04-1.23) | 1.13 (1.04-1.23) | Reitsma, 2021 25 |
|  |  | 10 Pack-Years | 1.27 (1.08-1.45) | 1.27 (1.08-1.45) | Reitsma, 2021 25 |
|  |  | 20 Pack-Years | 1.51 (1.18-1.83) | 1.51 (1.18-1.83) | Reitsma, 2021 25 |
|  |  | 40 Pack-Years | 1.60 (1.27-2.00) | 1.60 (1.27-2.00) | Reitsma, 2021 25 |
|  |  | 60 Pack-Years | 1.58 (1.15-2.10) | 1.58 (1.15-2.10) | Reitsma, 2021 25 |
|  | Liver | 1 Pack-Years | 1.04 (1.00-1.07) | 1.04 (1.00-1.07) | Reitsma, 2021 25 |
|  |  | 5 Pack-Years | 1.18 (1.01-1.36) | 1.18 (1.01-1.36) | Reitsma, 2021 25 |
|  |  | 10 Pack-Years | 1.35 (1.03-1.71) | 1.35 (1.03-1.71) | Reitsma, 2021 25 |
|  |  | 20 Pack-Years | 1.56 (1.20-1.97) | 1.56 (1.20-1.97) | Reitsma, 2021 25 |
|  |  | 40 Pack-Years | 1.78 (1.27-2.38) | 1.78 (1.27-2.38) | Reitsma, 2021 25 |
|  |  | 60 Pack-Years | 1.80 (1.19-2.67) | 1.80 (1.19-2.67) | Reitsma, 2021 25 |
|  | Pancreas | 1 Pack-Years | 1.04 (1.02-1.06) | 1.09 (1.06-1.12) | Reitsma, 2021 25 |
|  |  | 5 Pack-Years | 1.21 (1.11-1.31) | 1.43 (1.29-1.58) | Reitsma, 2021 25 |
|  |  | 10 Pack-Years | 1.41 (1.21-1.62) | 1.86 (1.57-2.17) | Reitsma, 2021 25 |
|  |  | 20 Pack-Years | 1.69 (1.47-1.92) | 2.46 (2.09-2.87) | Reitsma, 2021 25 |
|  |  | 40 Pack-Years | 2.00 (1.75-2.26) | 3.03 (2.41-3.67) | Reitsma, 2021 25 |
|  |  | 60 Pack-Years | 2.38 (1.86-3.00) | 3.74 (2.26-5.61) | Reitsma, 2021 25 |
|  | Larynx | 1 Pack-Years | 1.24 (1.12-1.39) | 1.24 (1.12-1.39) | Reitsma, 2021 25 |
|  |  | 5 Pack-Years | 2.20 (1.60-2.94) | 2.20 (1.60-2.94) | Reitsma, 2021 25 |
|  |  | 10 Pack-Years | 3.40 (2.19-4.88) | 3.40 (2.19-4.88) | Reitsma, 2021 25 |
|  |  | 20 Pack-Years | 5.88 (4.03-8.04) | 5.88 (4.03-8.04) | Reitsma, 2021 25 |
|  |  | 40 Pack-Years | 13.6 (8.67-20.4) | 13.6 (8.67-20.4) | Reitsma, 2021 25 |
|  |  | 60 Pack-Years | 21.9 (10.6-36.7) | 21.9 (10.6-36.7) | Reitsma, 2021 25 |
|  | Trachea, bronchus and lung | 1 Pack-Years | 1.15 (1.04-1.29) | 1.15 (1.04-1.29) | Reitsma, 2021 25 |
|  |  | 5 Pack-Years | 1.76 (1.21-2.45) | 1.76 (1.21-2.45) | Reitsma, 2021 25 |
|  |  | 10 Pack-Years | 3.43 (2.92-4.00) | 3.43 (2.92-4.00) | Reitsma, 2021 25 |
|  |  | 20 Pack-Years | 6.47 (5.78-7.26) | 6.47 (5.78-7.26) | Reitsma, 2021 25 |
|  |  | 40 Pack-Years | 12.6 (10.3-15.1) | 12.6 (10.3-15.1) | Reitsma, 2021 25 |
|  |  | 60 Pack-Years | 15.6 (12.4-19.2) | 15.6 (12.4-19.2) | Reitsma, 2021 25 |
|  | Cervix uteri | 1 Pack-Years |  | 1.16 (1.02-1.35) | Reitsma, 2021 25 |
|  |  | 5 Pack-Years |  | 1.79 (1.10-2.75) | Reitsma, 2021 25 |
|  |  | 10 Pack-Years |  | 2.05 (1.31-3.13) | Reitsma, 2021 25 |
|  |  | 20 Pack-Years |  | 3.04 (1.74-5.28) | Reitsma, 2021 25 |
|  |  | 40 Pack-Years |  | 4.21 (1.74-8.53) | Reitsma, 2021 25 |
|  |  | 60 Pack-Years |  | 4.21 (1.74-8.53) | Reitsma, 2021 25 |
|  | Ovary: mucinous | Current smokers |  | 2.10 (1.70-2.70) | Jordan, 2006 26 |
|  | Kidney | 1 Pack-Years | 1.03 (1.00-1.06) | 1.03 (1.00-1.06) | Reitsma, 2021 25 |
|  |  | 5 Pack-Years | 1.15 (1.02-1.30) | 1.15 (1.02-1.30) | Reitsma, 2021 25 |
|  |  | 10 Pack-Years | 1.30 (1.04-1.61) | 1.30 (1.04-1.61) | Reitsma, 2021 25 |
|  |  | 20 Pack-Years | 1.59 (1.29-1.90) | 1.59 (1.29-1.90) | Reitsma, 2021 25 |
|  |  | 40 Pack-Years | 1.79 (1.39-2.27) | 1.79 (1.39-2.27) | Reitsma, 2021 25 |
|  |  | 60 Pack-Years | 1.99 (1.31-2.91) | 1.99 (1.31-2.91) | Reitsma, 2021 25 |
|  | Bladder | 1 Pack-Years | 1.12 (1.05-1.21) | 1.12 (1.05-1.21) | Reitsma, 2021 25 |
|  |  | 5 Pack-Years | 1.60 (1.23-2.05) | 1.60 (1.23-2.05) | Reitsma, 2021 25 |
|  |  | 10 Pack-Years | 2.20 (1.46-3.11) | 2.20 (1.46-3.11) | Reitsma, 2021 25 |
|  |  | 20 Pack-Years | 2.98 (1.96-3.98) | 2.98 (1.96-3.98) | Reitsma, 2021 25 |
|  |  | 40 Pack-Years | 3.94 (2.67-5.63) | 3.94 (2.67-5.63) | Reitsma, 2021 25 |
|  |  | 60 Pack-Years | 4.55 (2.54-7.64) | 4.55 (2.54-7.64) | Reitsma, 2021 25 |
|  | Leukaemia | 1 Pack-Years | 1.08 (1.00-1.21) | 1.08 (1.00-1.21) | Reitsma, 2021 25 |
|  |  | 5 Pack-Years | 1.41 (1.00-2.05) | 1.41 (1.00-2.05) | Reitsma, 2021 25 |
|  |  | 10 Pack-Years | 1.81 (1.00-3.10) | 1.81 (1.00-3.10) | Reitsma, 2021 25 |
|  |  | 20 Pack-Years | 2.16 (1.33-3.33) | 2.16 (1.33-3.33) | Reitsma, 2021 25 |
|  |  | 40 Pack-Years | 2.64 (1.48-4.39) | 2.64 (1.48-4.39) | Reitsma, 2021 25 |
|  |  | 60 Pack-Years | 2.64 (1.48-4.39) | 2.64 (1.48-4.39) | Reitsma, 2021 25 |
|  | Nasopharynx | 1 Pack-Years | 1.08 (1.03-1.14) | 1.08 (1.03-1.14) | Reitsma, 2021 25 |
|  |  | 5 Pack-Years | 1.41 (1.16-1.71) | 1.41 (1.16-1.71) | Reitsma, 2021 25 |
|  |  | 10 Pack-Years | 1.82 (1.32-2.42) | 1.82 (1.32-2.42) | Reitsma, 2021 25 |
|  |  | 20 Pack-Years | 1.98 (1.39-2.72) | 1.98 (1.39-2.72) | Reitsma, 2021 25 |
|  |  | 40 Pack-Years | 2.56 (1.73-3.59) | 2.56 (1.73-3.59) | Reitsma, 2021 25 |
|  |  | 60 Pack-Years | 4.03 (2.72-5.75) | 4.03 (2.72-5.75) | Reitsma, 2021 25 |
| Alcohol consumption | Lip and oral cavity |  | 1.15 (1.09-1.22) | 1.15 (1.09-1.22) | WCRF CUP 2016 27 |
|  | Pharynx |  | 1.13 (1.05-1.21) | 1.13 (1.05-1.21) | WCRF CUP 2016 27 |
|  | Oesophagus: squamous cell |  | exp(ß1x + ß2x*ln(x)) (ß1 = 0.05593, ß2 = -0.00789) | exp(ß1x + ß2x*ln(x)) (ß1 = 0.05593, ß2 = -0.00789) | Shield 2018 (France), originally from Bagnardi 2015 28,29 |
|  | Colon |  | 1.07 (1.05-1.08) | 1.07 (1.05-1.08) | WCRF CUP 2017 27 |
|  | Rectum |  | 1.07 (1.05-1.08) | 1.07 (1.05-1.08) | WCRF CUP 2017 27 |
|  | Liver: hepatocellular |  | 1.14 (1.04-1.25) | 1.14 (1.04-1.25) | WCRF CUP 2015 27 |
|  | Larynx |  | 1.09 (1.05-1.13) | 1.09 (1.05-1.13) | WCRF CUP 2016 27 |
|  | Breast: pre-menopausal |  |  | 1.04 (1.01-1.08) | WCRF CUP 2017 27 |
|  | Breast: post-menopausal |  |  | 1.08 (1.05-1.10) | WCRF CUP 2017 27 |
| High body mass index | Oesophagus: adenocarcinoma |  | 1.56 (1.39-1.74) | 1.48 (1.29-1.71) | WCRF CUP 2016 27 |
|  | Stomach: cardia |  | 1.23 (1.07-1.40) | 1.23 (1.07-1.40) | WCRF CUP 2016 27 |
|  | Colon |  | 1.10 (1.07-1.13) | 1.04 (1.02-1.06) | WCRF CUP 2017 27 |
|  | Rectum |  | 1.02 (1.01-1.04) | 1.01 (0.99-1.03) | WCRF CUP 2017 27 |
|  | Liver: hepatocellular |  | 1.21 (1.02-1.44) | 1.21 (1.10-1.33) | WCRF CUP 2015 27 |
|  | Gallbladder |  | 1.23 (1.13-1.33) | 1.25 (1.07-1.46) | WCRF CUP 2015 27 |
|  | Pancreas |  | 1.13 (1.04-1.22) | 1.10 (1.04-1.16) | WCRF CUP 2012 27 |
|  | Breast: post-menopausal |  |  | 1.12 (1.09-1.15) | WCRF CUP 2016 27 |
|  | Corpus uteri |  |  | 1.50 (1.42-1.59) | WCRF CUP 2013 27 |
|  | Ovary |  |  | 1.06 (1.02-1.11) | WCRF CUP 2014 27 |
|  | Kidney |  | 1.29 (1.23-1.36) | 1.28 (1.24-1.32) | WCRF CUP 2015 27 |
|  | Multiple myeloma |  | 1.08 (1.00-1.17) | 1.06 (1.02-1.11) | Abar, 2019 30 |
| Insufficient physical activity | Colon |  | 1.23 (1.12-1.34) | 1.12 (1.01-1.23) | Wolin, 2009 31 |
|  | Breast |  |  | 1.25 | Friedenreich, Cust, 2008 32 |
|  | Corpus uteri |  |  | 1.25 (1.18-1.33) | Schmid, 2015 33 |
| Smokeless tobacco and areca nut | Lip (oral cavity) | China, Papua New Guinea, Oceania (excl. Australia & New Zealand) | 7.89 (3.9-15.98) | 7.89 (3.9-15.98) | Rumgay, 2025 7 |
|  |  | Sweden | 0.93 (0.59-1.44) | 0.93 (0.59-1.44) | Rumgay, 2025 7 |
|  |  | India, Southern Asia (excl. Pakistan & Afghanistan), South-East Asia, United Kingdom, Comoros, La Réunion, Madagascar, Mauritius | 5.32 (3.53-8.02) | 5.32 (3.53-8.02) | Rumgay, 2025 7 |
|  |  | Northern Africa, sub-Saharan Africa (excl. Sudan, Chad), East Asia (excl. China), Western Asia, Northern & Western Europe (excl. UK, Sweden & Norway), Southern and Central & Eastern Europe, Latin America & Caribbean, Australia & New Zealand | 3.94 (2.70-5.76) | 3.94 (2.70-5.76) | Rumgay, 2025 7 |
|  |  | Pakistan, Afghanistan, Iran (Islamic Republic of), Kazakhstan, Kyrgyzstan, Tajikistan, Turkmenistan, Uzbekistan | 14.52 (7.69-27.41) | 14.52 (7.69-27.41) | Rumgay, 2025 7 |
|  |  | Sudan, Chad | 3.80 (1.70-8.59) | 3.80 (1.70-8.59) | Rumgay, 2025 7 |
|  |  | United States, Canada | 3.01 (1.63-5.55) | 3.01 (1.63-5.55) | Rumgay, 2025 7 |
|  |  | Norway | 1.10 (0.50-2.42) | 1.10 (0.50-2.42) | Rumgay, 2025 7 |
| Suboptimal breastfeeding | Breast | Low and middle income |  | 1.12 (1.06-1.19) | Renfrew, 2012 34 |
|  |  | High income |  | 1.06 (1.03-1.10) | Renfrew, 2012 34 |

**Table 3.2.** Relative risks (RR) and corresponding 95% confidence interval (95%-CI) by cancer site associated with environmental risk factors

| **Risk Factor** | **Cancer Site** | **Relative Risk (95% CI)** | | **Source** |
| --- | --- | --- | --- | --- |
|  |  | Men | Women |  |
| Air pollution | Trachea, bronchus and lung | 1.09 (1.04-1.14) | 1.09 (1.04-1.14) | Hamra, 2014 35 |
| Ultra-violet radiation | Melanoma | N/A | N/A |  |

**Table 3.3**. Relative risks (RR) by cancer site associated with infectious agents

| **Risk Factor** | **Cancer Site** | **Relative Risk** | | **Source** |
| --- | --- | --- | --- | --- |
|  |  | Men | Women |  |
| *Helicobacter pylori* | Gastric: non-cardia | 17 | 17 | Plummer, 2015 36 |
|  | Gastric: cardia | 1.6 | 1.6 | Plummer, 2016 11 |
|  | Non-Hodgkin lymphoma: gastric location | 7.2 | 7.2 | Plummer, 2016 11 |
| Human papillomavirus (types 16, 18, 31, 33, 35, 39, 45, 51, 52, 56, 58 and 59) | Oral cavity | N/A | N/A | de Martel, 2017 37 |
|  | Oropharyngeal | N/A | N/A | de Martel, 2017 37 |
|  | Larynx | N/A | N/A | de Martel, 2017 37 |
|  | Anus: squamous cell | N/A | N/A | de Martel , 2020 38 |
|  | Vulva |  | N/A | Plummer, 2016 11 |
|  | Vagina |  | N/A | Plummer, 2016 11 |
|  | Cervix uteri |  | N/A | Plummer, 2016 11 |
|  | Penis | N/A |  | Plummer, 2016 11 |
| Hepatitis B virus | Liver: hepatocellular | 23.4 | 23.4 | Maucort-Boulch, 201839 |
| Hepatitis C virus | Liver: hepatocellular | 27.6 | 27.6 | Maucort-Boulch, 201839 |
|  | Other non-Hodgkin lymphomas | 2.5 | 2.5 | Plummer, 2016 11 |
| Epstein-Barr virus | Nasopharynx | N/A | N/A | Plummer, 2016 11 |
|  | Hodgkin lymphoma | N/A | N/A | Plummer, 2016 11 |
|  | Burkitt lymphoma | N/A | N/A | Plummer, 2016 11 |
| Human herpesvirus type 8 | Kaposi sarcoma | N/A | N/A | Plummer, 2016 11 |
| *Schistosoma haematobium* | Bladder | N/A | N/A | de Martel, 2020 38 |
| Human T-cell lymphotropic virus | Adult t-cell leukaemia and lymphoma | N/A | N/A | Plummer, 2016 11 |
| *Opisthorchis viverrini and Clonorchis sinensis* | Cholangiocarcinoma | 7.7 | 7.7 | de Martel, 2020 38 |

**Table 3.4.** Relative risks (RR) by cancer site associated with occupational exposures

| **Risk Factor** | **Cancer Site** | **Exposure Level** | **Relative Risk (95% CI)** | | **Source** |
| --- | --- | --- | --- | --- | --- |
|  |  |  | Men | Women |  |
| Asbestos | Trachea, bronchus and lung | High exposure | 2.28 (1.74-2.94) | 1.88 (1.59-2.21) | GBD, 2018 40 |
|  | Larynx | High exposure | 1.38 (1.19-1.61) | 1.39 (1.19-1.60) | GBD, 2018 40 |
|  | Mesothelioma |  |  |  |  |
|  | Ovary | High exposure |  | 1.81 (1.39-2.31) | GBD, 2018 40 |
| Arsenic | Trachea, bronchus and lung | High exposure | 2.06 (1.52-2.55) | 2.06 (1.52-2.55) | GBD, 2018 40 |
|  |  | Low exposure | 1.75 (0.70-2.78) | 1.75 (0.70-2.78) | GBD, 2018 40 |
| Benzene | Acute lymphoid leukaemia | High exposure | 2.62 (1.22-3.98) | 2.62 (1.22-3.98) | GBD, 2018 40 |
|  |  | Low exposure | 1.63 (1.0-2.26) | 1.63 (1.0-2.26) | GBD, 2018 40 |
|  | Chronic lymphoid leukaemia | High exposure | 2.62 (1.22-3.98) | 2.62 (1.22-3.98) | GBD, 2018 40 |
|  |  | Low exposure | 1.63 (1.0-2.26) | 1.63 (1.0-2.26) | GBD, 2018 40 |
|  | Acute myeloid leukaemia | High exposure | 2.62 (1.22-3.98) | 2.62 (1.22-3.98) | GBD, 2018 40 |
|  |  | Low exposure | 1.63 (1.0-2.26) | 1.63 (1.0-2.26) | GBD, 2018 40 |
|  | Chronic myeloid leukaemia | High exposure | 2.62 (1.22-3.98) | 2.62 (1.22-3.98) | GBD, 2018 40 |
|  |  | Low exposure | 1.63 (1.0-2.26) | 1.63 (1.0-2.26) | GBD, 2018 40 |
|  | Other leukaemia | High exposure | 2.62 (1.22-3.98) | 2.62 (1.22-3.98) | GBD, 2018 40 |
|  |  | Low exposure | 1.63 (1.0-2.26) | 1.63 (1.0-2.26) | GBD, 2018 40 |
| Beryllium | Trachea, bronchus and lung | High exposure | 1.17 (1.07-1.27) | 1.17 (1.07-1.27) | GBD, 2018 40 |
| Cadmium | Trachea, bronchus and lung | High exposure | 1.19 (1.09-1.30) | 1.19 (1.09-1.30) | GBD, 2018 40 |
| Chromium | Trachea, bronchus and lung | High exposure | 1.18 (1.12-1.25) | 1.18 (1.12-1.25) | GBD, 2018 40 |
| Diesel Engine Exhaust | Trachea, bronchus and lung | High exposure | 1.47 (1.29-1.68) | 1.47 (1.28-1.67) | GBD, 2018 40 |
| Formaldehyde | Nasopharynx | High exposure | 2.23 (1.04 -4.13) | 2.27 (1.08-4.18) | GBD, 2018 40 |
|  | Acute lymphoid leukaemia | High exposure | 1.48 (1.19-1.83) | 1.47 (1.18-1.77) | GBD, 2018 40 |
|  | Chronic lymphoid leukaemia | High exposure | 1.48 (1.19-183) | 1.47 (1.18-1.77) | GBD, 2018 40 |
|  | Acute myeloid leukaemia | High exposure | 1.48 (1.19-1.83) | 1.47 (1.18-1.77) | GBD, 2018 40 |
|  | Chronic myeloid leukaemia | High exposure | 1.48 (1.19-1.83) | 1.47 (1.18-1.77) | GBD, 2018 40 |
|  | Other leukaemia | High exposure | 1.48 (1.19-1.83) | 1.47 (1.18-1.77) | GBD, 2018 40 |
| Nickel | Trachea, bronchus and lung | High exposure | 2.15 (1.30-3.30) | 2.15 (1.30-3.30) | GBD, 2018 40 |
|  |  | Low exposure | 1.54 (0.61-3.36) | 1.54 (0.61-3.36) | GBD, 2018 40 |
| Polycyclic aromatic hydrocarbons | Trachea, bronchus and lung | High exposure | 1.31 (1.17-1.48) | 1.31 (1.16-1.47) | GBD, 2018 40 |
| Silica | Trachea, bronchus and lung | High exposure | 1.70 (1.16-2.26) | 1.70 (1.16-2.26) | GBD, 2018 40 |
|  |  | Low exposure | 1.54 (1.06-1.99) | 1.54 (1.06-1.99) | GBD, 2018 40 |
| Sulphuric acid | Larynx | High exposure | 4.57 (2.12-8.33) | 4.57 (2.12-8.33) | GBD, 2018 40 |
|  |  | Low exposure | 2.02 (0.94-3.78) | 2.02 (0.94-3.78) | GBD, 2018 40 |
| Trichloroethylene | Kidney | High exposure | 1.25 (1.05-1.46) | 1.25 (1.05-1.46) | GBD, 2018 40 |

# Statistical method for PAF estimation by risk factor

## Tobacco Smoking

PAFs for smoking-related cancers were estimated using a simplified form of the equation presented in GBD, 2019 3, focusing on former and current smokers with pack-years as the exposure definition. PAFs were calculated as the sum of contributions from former and current smokers, weighted by their prevalence in the population and the relative risk associated with cumulative exposure:

Where *Lformer* and *Lcurrent*are the prevalences of former and current smokers, *fformer(y)* and *fcurrent(p)* are the distributions of years since quitting and pack-years, respectively, and *RRformer(y)* and *RRcurrent(p)* are the relative risks associated with these exposures.

For former smokers, the relative risk was modeled as a function of years since quitting, and the distribution of years since quitting was incorporated to reflect variation within the population. For current smokers, the relative risk was modeled as a function of pack-years, capturing both the duration and intensity of smoking. Exposures were lagged based on the weighted-average length of follow-up from studies included in meta-regressions and rounded to the nearest five-year increment, to account for the latency between smoking exposure and cancer development.

## Alcohol Consumption

The PAF for alcohol consumption was estimated using the Levin-based PAF method 41, adapted from Shield and colleagues 28, and assuming a theoretical minimum-risk exposure of lifetime abstention from alcohol consumption. Age-, sex-, and country-specific PAFs were calculated for each cancer site by combining alcohol consumption prevalence with the corresponding relative risk (RR) estimates.

The RRs for alcohol consumption were transformed to a linear scale to be compatible with the population attributable fraction (PAF) estimation formula. For each cancer site with a linear dose–response relationship, the natural logarithm of the RR was used, and the corresponding variance was derived from the reported 95% confidence intervals.

For oesophageal squamous cell carcinoma (SCC), a non-linear dose–response curve was applied, using the RR function and variance–covariance matrix reported by Shield et al. 28 originally derived from Bagnardi et al 29. For colorectal cancer, risk estimates were modelled only for alcohol consumption above 20 g/day, consistent with the non-linear dose–response curve from the World Cancer Research Fund (WCRF) Continuous Update Project, which reported no significant increase in risk below this level. Similarly, for pancreatic and stomach cancers, RRs were modelled only for consumption exceeding 45 g/day, in accordance with WCRF conclusions that evidence was insufficient to estimate risk below this intake 27.

Alcohol consumption was modelled continuously by the average grams of alcohol consumed per day (x), with an upper integration limit of 150 g/day, using the following general formula:

Where *PCD* is the prevalence of current drinking and *RRCD* is the cancer relative risk of current drinking.

All analyses accounted for a 10-year latency period between exposure and cancer incidence, using alcohol consumption data from 2010 to estimate the burden in 2020.

Further details on the data sources, modelling assumptions, and calculation methods can be found elsewhere 42.

## High Body Mass Index

Population-attributable fraction (PAF) estimation for high body mass index (BMI) was calculated using the standard equation for continuous exposures:

Where *P(x)* is the population distribution of BMI, *P’(x)* is the distribution at the theoretical minimum-risk BMI, and *RR(x)* is the relative risk of cancer associated with BMI at level x. A detailed description of the methodology, assumptions, and calculations of PAFs is provided elsewhere 18.

Sex- and country-specific PAFs were calculated for each high body mass index-related cancer site. The number of cancer cases attributable to high BMI was derived by multiplying the sex-, country-, and cancer-specific PAFs by the corresponding cancer incidence. Overall country- and regional-level estimates were obtained by summing the number of attributable cases across cancer sites and dividing by the total number of cancer cases in each subgroup.

## Insufficient Physical Activity

PAF estimation for insufficient physical activity was calculated using the conventional formula:

Where *P* is the prevalence of insufficient physical activity in the population, and *RR* is the relative risk of cancer associated with insufficient physical activity

## Smokeless Tobacco and Areca Nut

PAFs for smokeless tobacco were estimated using Levin’s formula:

where *P* is the sex-, age-, and country-specific prevalence of current smokeless tobacco consumption, and *RR* is the corresponding relative risk for oral cancer.

To facilitate international comparison, age-standardized rates (ASRs) of oral cancer cases attributable to smokeless tobacco use were calculated using the Segi-Doll world standard population. Estimates were aggregated by United Nations geographical regions, WHO regions, and World Bank income groups.

For countries without national cancer incidence estimates, regional averages were applied. As some oral cancer cases may be attributable to multiple product types, PAFs for different smokeless tobacco or areca nut products within a country were not summed. Further methodological details are available elsewhere 7.

## Suboptimal Breastfeeding

The PAF for suboptimal breastfeeding was estimated following the method applied by Victora et al. 43. The PAF represents the proportion and number of cancer cases attributable to breastfeeding durations shorter than the optimal level, given the protective effect of breastfeeding against breast cancer. Optimal breastfeeding was defined as continued breastfeeding for 12–23 months, based on evidence that the protective effects are observed when breastfeeding extends beyond six months. The PAF for suboptimal breastfeeding was calculated using the following equation:

Where *P* is the prevalence of optimal breastfeeding and *RR* is the relative risk reduction associated with optimal breastfeeding.

## Air Pollution

The PAF for ambient air pollution was estimated based on the relationship between exposure to fine particulate matter (PM₂.₅) and lung cancer risk. The PAF was calculated using the following equation:

where RR’ is the excess risk for a given PM2.5 exposure.

Assuming a log-linear concentration–response relationship between PM₂.₅ exposure and lung cancer risk, the excess risk (RR′) for a given PM₂.₅ concentration (x) was modelled as:

Where *x* represents the annual mean concentration of PM₂.₅, *x0* is the reference level (set at 10 μg/m³, the current WHO air quality guideline 44), and β was calculated as:

where RR = 1.09 per 10 μg/m³ increase in PM₂.₅ concentration, based on meta-analytic evidence.

## Ultraviolet radiation

The PAF for ultraviolet radiation (UVR) was estimated out of the total cutaneous melanoma (CM) incidence, corrected for acral lentiginous melanoma (ALM) by country, age (5-year age groups), and sex, using an adapted version of the model by Arnold et al. 45:

Where *IP* is the incidence in the index population, *pacral* is the proportion of ALM (defined as 0 for Europe, North America, and Australia/New Zealand; 0.495 for sub-Saharan Africa; 0.487 for Asia [excluding the Middle East] and Melanesia/Polynesia/Micronesia; 0.106 for Latin America; and 0.346 for MENA), and *IU* is the incidence in the minimally exposed reference population.

This adjustment using the proportion of ALM was applied to exclude the share of melanoma not associated with UVR exposure. In the main analysis, the reference population was based on Nordic countries, and therefore the ALM proportion was assumed to be zero.

Further methodological details and sensitivity analyses are described elsewhere 10.

## Infectious agents

The PAF for infectious agents was estimated using different methods, depending on the nature of the association between the infectious agent and cancer.

For infections that are necessary causes of cancer (e.g., Human papillomavirus [HPV] in cervical cancer, Human T-cell lymphoma virus type 1 [HTLV-1] in adult T-cell lymphoma, and Human herpesvirus type 8 [HHV-8] in Kaposi sarcoma), all cases among the exposed were attributed to the infection, and therefore PAF was assumed to be 100%.

For infections that are sufficient causes of cancer (e.g., Epstein–Barr virus [EBV] in nasopharyngeal cancer, *Schistosoma haematobium* in bladder cancer), the relative risk tends to infinity, and the PAF was assumed to equal the prevalence of infection in cancer cases (*PAF = pc*), where *pc* is the prevalence of the infectious agent among cancer cases.

For infections that are neither necessary nor sufficient causes of cancer (e.g., *Helicobacter pylori* in stomach cancer, Hepatitis B and C viruses [HBV, HCV] in liver cancer), the PAF was estimated using the conventional formula:

Where *pc* is the prevalence of infection in cancer cases and *RR* is the relative risk of cancer associated with the infectious agent.

Prevalence estimates from multiple studies were combined using a logistic binomial model with normal random effects. When multiple infectious agents were linked to the same cancer site, the PAFs were assumed to be additive, representing alternate causal pathways.

Further methodological details and sensitivity analyses are described elsewhere 11.

## Occupational exposures

PAFs for occupational risk factors were estimated following the Comparative Risk Assessment (CRA) framework used in the WHO/ILO Joint Estimates. PAFs quantify the proportion of deaths or disability-adjusted life years (DALYs) attributable to specific occupational exposures and were calculated using the standard CRA formula:

Where *Pi* is the prevalence of exposure level 𝑖 and *RRi* is the corresponding relative risk. The resulting PAFs were applied to the total number of deaths and DALYs from the WHO Global Health Estimates to determine the number of cases attributable to each occupational exposure. All estimates were produced in accordance with WHO and ILO statistical standards and GATHER reporting guidelines. Further methodological details are available elsewhere 24.

# Results by risk factor and cancer site

## Total PAFs by country and sex

**Table 5.1.1**. Unadjusted population-attributable fractions and attributable cases, by country and risk factor for women

| **Country** | **Tobacco Smoking** | **Alcohol consumption** | **High Body Mass Index** | **Insufficient Physical Activity** | **Smokeless Tobacco and Areca Nut** | **Suboptimal Breastfeeding** | **Air Pollution** | **Ultraviolet Radiation** | **Infections** | **Occupational** | **Total PAF - All risk factors combined** |
| --- | --- | --- | --- | --- | --- | --- | --- | --- | --- | --- | --- |
|  | **N (PAF)** | **N (PAF)** | **N (PAF)** | **N (PAF)** | **N (PAF)** | **N (PAF)** | **N (PAF)** | **N (PAF)** | **N (PAF)** | **N (PAF)** |  |
| Afghanistan | 187 (1.5%) | 6 (0.0%) | 203 (1.6%) | 344 (2.7%) | 119 (0.9%) | 102 (0.8%) | 148 (1.2%) | 0 (0.0%) | 2100 (16.4%) | 48 (0.4%) | 23.7% |
| Albania | 243 (7.3%) | 54 (1.6%) | 187 (5.7%) | 81 (2.4%) | 0 (0.0%) | 62 (1.9%) | 29 (0.9%) | 0 (0.0%) | 447 (13.5%) | 15 (0.5%) | 29.8% |
| Algeria | 333 (1.0%) | 35 (0.1%) | 1297 (3.7%) | 1294 (3.7%) | 3 (0.0%) | 1037 (3.0%) | 76 (0.2%) | 0 (0.0%) | 3758 (10.8%) | 11 (0.0%) | 20.9% |
| Angola | 290 (2.1%) | 288 (2.1%) | 168 (1.2%) | 162 (1.2%) | 2 (0.0%) | 105 (0.8%) | 13 (0.1%) | 0 (0.0%) | 4017 (29.3%) | 2 (0.0%) | 34.4% |
| Azerbaijan | 76 (0.9%) | 65 (0.8%) | 512 (6.0%) | 157 (1.8%) | 0 (0.0%) | 178 (2.1%) | 64 (0.8%) | 0 (0.0%) | 1288 (15.2%) | 13 (0.2%) | 25.3% |
| Argentina | 7340 (11.0%) | 1684 (2.5%) | 4331 (6.5%) | 2488 (3.7%) | 3 (0.0%) | 1449 (2.2%) | 111 (0.2%) | 0 (0.0%) | 6820 (10.2%) | 605 (0.9%) | 32.0% |
| Australia | 6022 (8.5%) | 2416 (3.4%) | 4114 (5.8%) | 2089 (3.0%) | 8 (0.0%) | 1053 (1.5%) | 0 (0.0%) | 5143 (7.3%) | 2933 (4.2%) | 1518 (2.2%) | 30.9% |
| Austria | 2834 (13.4%) | 628 (3.0%) | 901 (4.3%) | 570 (2.7%) | 0 (0.0%) | 0 (0.0%) | 87 (0.4%) | 754 (3.6%) | 1167 (5.5%) | 305 (1.4%) | 30.1% |
| Bahamas | 12 (2.5%) | 4 (0.9%) | 47 (10.0%) | 22 (4.7%) | 0 (0.0%) | 0 (0.0%) | 0 (0.0%) | 0 (0.0%) | 64 (13.6%) | 0 (0.0%) | 28.3% |
| Bahrain | 15 (2.1%) | 2 (0.3%) | 26 (3.5%) | 33 (4.5%) | 0 (0.0%) | 0 (0.0%) | 8 (1.1%) | 0 (0.0%) | 42 (5.8%) | 0 (0.0%) | 16.3% |
| Bangladesh | 1437 (2.0%) | 70 (0.1%) | 5 (0.0%) | 1004 (1.4%) | 3220 (4.5%) | 114 (0.2%) | 880 (1.2%) | 0 (0.0%) | 12945 (18.0%) | 171 (0.2%) | 25.6% |
| Armenia | 77 (1.7%) | 52 (1.2%) | 381 (8.6%) | 90 (2.0%) | 0 (0.0%) | 79 (1.8%) | 75 (1.7%) | 0 (0.0%) | 471 (10.7%) | 35 (0.8%) | 25.7% |
| Barbados | 8 (1.6%) | 8 (1.5%) | 51 (9.5%) | 20 (3.7%) | 0 (0.0%) | 5 (0.9%) | 0 (0.0%) | 0 (0.0%) | 53 (9.8%) | 0 (0.0%) | 24.6% |
| Belgium | 4098 (12.1%) | 1115 (3.3%) | 1841 (5.4%) | 1402 (4.1%) | 0 (0.0%) | 0 (0.0%) | 124 (0.4%) | 2009 (5.9%) | 1462 (4.3%) | 457 (1.4%) | 31.9% |
| Bhutan | 13 (4.6%) | 2 (0.7%) | 3 (1.1%) | 1 (0.4%) | 2 (0.7%) | 0 (0.0%) | 4 (1.4%) | 0 (0.0%) | 82 (29.4%) | 0 (0.0%) | 35.4% |
| Bolivia | 261 (2.8%) | 81 (0.9%) | 479 (5.0%) | 134 (1.4%) | 0 (0.0%) | 71 (0.7%) | 52 (0.5%) | 48 (0.5%) | 2780 (29.3%) | 62 (0.7%) | 37.8% |
| Bosnia Herzegovina | 886 (14.3%) | 87 (1.4%) | 325 (5.3%) | 117 (1.9%) | 1 (0.0%) | 149 (2.4%) | 107 (1.7%) | 52 (0.8%) | 588 (9.5%) | 9 (0.1%) | 32.5% |
| Botswana | 63 (4.8%) | 19 (1.4%) | 35 (2.6%) | 20 (1.5%) | 3 (0.2%) | 24 (1.8%) | 0 (0.0%) | 0 (0.0%) | 612 (46.1%) | 0 (0.0%) | 52.4% |
| Brazil | 24061 (8.2%) | 6388 (2.2%) | 14588 (5.0%) | 10877 (3.7%) | 62 (0.0%) | 5873 (2.0%) | 679 (0.2%) | 0 (0.0%) | 31124 (10.6%) | 2240 (0.8%) | 28.7% |
| Belize | 6 (2.8%) | 3 (1.7%) | 14 (6.8%) | 10 (4.9%) | 0 (0.0%) | 5 (2.4%) | 0 (0.0%) | 3 (1.5%) | 42 (20.4%) | 0 (0.0%) | 35.1% |
| Solomon Islands | 20 (4.9%) | 1 (0.2%) | 17 (4.3%) | 9 (2.2%) | 1 (0.1%) | 4 (1.0%) | 0 (0.0%) | 0 (0.0%) | 84 (20.7%) | 0 (0.0%) | 30.4% |
| Brunei Darussalam | 36 (7.0%) | 1 (0.1%) | 23 (4.4%) | 15 (2.9%) | 1 (0.1%) | 0 (0.0%) | 0 (0.0%) | 0 (0.0%) | 88 (16.9%) | 0 (0.0%) | 28.4% |
| Bulgaria | 1655 (11.3%) | 399 (2.7%) | 930 (6.3%) | 343 (2.3%) | 0 (0.0%) | 0 (0.0%) | 105 (0.7%) | 3 (0.0%) | 1615 (11.0%) | 56 (0.4%) | 30.5% |
| Myanmar | 3518 (8.6%) | 254 (0.6%) | 352 (0.9%) | 678 (1.7%) | 431 (1.1%) | 181 (0.4%) | 573 (1.4%) | 0 (0.0%) | 11338 (27.6%) | 513 (1.3%) | 38.5% |
| Burundi | 93 (2.0%) | 73 (1.6%) | 0 (0.0%) | 36 (0.8%) | 2 (0.0%) | 11 (0.2%) | 12 (0.3%) | 0 (0.0%) | 1943 (42.6%) | 0 (0.0%) | 45.5% |
| Belarus | 749 (3.6%) | 883 (4.3%) | 1835 (8.9%) | 270 (1.3%) | 0 (0.0%) | 471 (2.3%) | 36 (0.2%) | 416 (2.0%) | 1895 (9.2%) | 64 (0.3%) | 28.1% |
| Cambodia | 451 (4.3%) | 140 (1.3%) | 22 (0.2%) | 105 (1.0%) | 129 (1.2%) | 97 (0.9%) | 54 (0.5%) | 0 (0.0%) | 2198 (20.9%) | 69 (0.7%) | 28.7% |
| Cameroon | 73 (0.6%) | 218 (1.9%) | 222 (1.9%) | 244 (2.1%) | 3 (0.0%) | 218 (1.9%) | 43 (0.4%) | 0 (0.0%) | 3751 (32.8%) | 5 (0.0%) | 38.6% |
| Canada | 16240 (14.4%) | 2671 (2.4%) | 7255 (6.4%) | 3962 (3.5%) | 0 (0.0%) | 0 (0.0%) | 0 (0.0%) | 4077 (3.6%) | 5025 (4.4%) | 1548 (1.4%) | 31.4% |
| Cape Verde | 4 (2.0%) | 4 (1.8%) | 5 (2.4%) | 5 (2.3%) | 1 (0.6%) | 4 (1.9%) | 1 (0.5%) | 0 (0.0%) | 59 (27.3%) | 0 (0.0%) | 35.2% |
| Central African Republic | 16 (1.0%) | 15 (0.9%) | 19 (1.2%) | 29 (1.8%) | 4 (0.2%) | 21 (1.3%) | 3 (0.2%) | 0 (0.0%) | 427 (26.7%) | 0 (0.0%) | 31.5% |
| Sri Lanka | 249 (1.4%) | 202 (1.2%) | 252 (1.5%) | 416 (2.4%) | 158 (0.9%) | 53 (0.3%) | 67 (0.4%) | 0 (0.0%) | 1998 (11.5%) | 48 (0.3%) | 18.7% |
| Chad | 55 (1.2%) | 60 (1.3%) | 3 (0.1%) | 40 (0.9%) | 1 (0.0%) | 19 (0.4%) | 6 (0.1%) | 0 (0.0%) | 1734 (38.0%) | 1 (0.0%) | 40.5% |
| Chile | 2588 (9.9%) | 565 (2.2%) | 1905 (7.3%) | 708 (2.7%) | 1 (0.0%) | 0 (0.0%) | 174 (0.7%) | 0 (0.0%) | 3274 (12.6%) | 152 (0.6%) | 31.4% |
| China | 141748 (6.3%) | 34398 (1.5%) | 40449 (1.8%) | 36898 (1.6%) | 57 (0.0%) | 30537 (1.3%) | 125461 (5.5%) | 0 (0.0%) | 313085 (13.8%) | 31417 (1.4%) | 29.4% |
| Colombia | 2559 (4.3%) | 574 (1.0%) | 3046 (5.1%) | 1803 (3.0%) | 41 (0.1%) | 1033 (1.7%) | 181 (0.3%) | 0 (0.0%) | 8706 (14.5%) | 257 (0.4%) | 27.2% |
| Comoros | 8 (2.1%) | 0 (0.1%) | 5 (1.3%) | 3 (0.8%) | 0 (0.0%) | 2 (0.5%) | 0 (0.0%) | 0 (0.0%) | 183 (49.3%) | 0 (0.0%) | 51.7% |
| Congo, Republic of | 18 (1.1%) | 24 (1.5%) | 24 (1.5%) | 29 (1.9%) | 0 (0.0%) | 33 (2.1%) | 2 (0.1%) | 0 (0.0%) | 505 (32.6%) | 0 (0.0%) | 38.0% |
| Congo, Democratic People Republic of | 348 (1.2%) | 173 (0.6%) | 97 (0.3%) | 352 (1.2%) | 52 (0.2%) | 146 (0.5%) | 70 (0.2%) | 0 (0.0%) | 10940 (37.4%) | 25 (0.1%) | 40.0% |
| Costa Rica | 205 (3.5%) | 44 (0.7%) | 361 (6.2%) | 208 (3.5%) | 0 (0.0%) | 89 (1.5%) | 12 (0.2%) | 0 (0.0%) | 757 (12.9%) | 3 (0.1%) | 25.8% |
| Croatia | 1599 (12.7%) | 310 (2.5%) | 857 (6.8%) | 240 (1.9%) | 1 (0.0%) | 0 (0.0%) | 95 (0.8%) | 300 (2.4%) | 752 (6.0%) | 103 (0.8%) | 29.8% |
| Cuba | 2938 (13.9%) | 211 (1.0%) | 1167 (5.5%) | 1176 (5.6%) | 1 (0.0%) | 445 (2.1%) | 92 (0.4%) | 0 (0.0%) | 2004 (9.5%) | 172 (0.8%) | 33.4% |
| Cyprus | 213 (7.1%) | 80 (2.7%) | 200 (6.7%) | 137 (4.6%) | 0 (0.0%) | 0 (0.0%) | 9 (0.3%) | 28 (0.9%) | 137 (4.6%) | 11 (0.4%) | 24.4% |
| Czechia | 3440 (12.0%) | 957 (3.3%) | 2151 (7.5%) | 645 (2.3%) | 11 (0.0%) | 0 (0.0%) | 181 (0.6%) | 1113 (3.9%) | 1616 (5.6%) | 182 (0.6%) | 31.2% |
| Benin | 42 (1.1%) | 29 (0.7%) | 93 (2.3%) | 66 (1.7%) | 5 (0.1%) | 47 (1.2%) | 8 (0.2%) | 0 (0.0%) | 1053 (26.6%) | 0 (0.0%) | 31.8% |
| Denmark | 3551 (17.0%) | 549 (2.6%) | 718 (3.4%) | 371 (1.8%) | 2 (0.0%) | 0 (0.0%) | 32 (0.2%) | 1473 (7.0%) | 851 (4.1%) | 410 (2.0%) | 33.1% |
| Dominican Republic | 992 (10.7%) | 155 (1.7%) | 403 (4.3%) | 374 (4.0%) | 1 (0.0%) | 286 (3.1%) | 0 (0.0%) | 0 (0.0%) | 1518 (16.3%) | 19 (0.2%) | 34.8% |
| Ecuador | 474 (2.9%) | 179 (1.1%) | 837 (5.1%) | 315 (1.9%) | 0 (0.0%) | 202 (1.2%) | 44 (0.3%) | 0 (0.0%) | 3161 (19.3%) | 79 (0.5%) | 29.3% |
| El Salvador | 146 (2.7%) | 36 (0.7%) | 268 (4.9%) | 180 (3.3%) | 0 (0.0%) | 59 (1.1%) | 28 (0.5%) | 0 (0.0%) | 1031 (18.8%) | 1 (0.0%) | 28.9% |
| Equatorial Guinea | 5 (0.9%) | 12 (2.4%) | 11 (2.2%) | 12 (2.4%) | 0 (0.0%) | 13 (2.6%) | 1 (0.2%) | 0 (0.0%) | 168 (33.1%) | 0 (0.0%) | 39.9% |
| Ethiopia | 206 (0.4%) | 368 (0.7%) | 0 (0.0%) | 653 (1.3%) | 11 (0.0%) | 188 (0.4%) | 125 (0.2%) | 0 (0.0%) | 11160 (21.8%) | 158 (0.3%) | 24.4% |
| Eritrea | 4 (0.2%) | 4 (0.3%) | 0 (0.0%) | 22 (1.4%) | 0 (0.0%) | 8 (0.5%) | 4 (0.3%) | 0 (0.0%) | 294 (19.3%) | 2 (0.1%) | 21.6% |
| Estonia | 349 (9.4%) | 102 (2.7%) | 249 (6.7%) | 43 (1.2%) | 0 (0.0%) | 0 (0.0%) | 0 (0.0%) | 119 (3.2%) | 323 (8.7%) | 14 (0.4%) | 28.4% |
| Fiji | 38 (4.0%) | 5 (0.6%) | 61 (6.5%) | 19 (2.0%) | 0 (0.0%) | 17 (1.8%) | 0 (0.0%) | 0 (0.0%) | 194 (20.6%) | 0 (0.0%) | 31.7% |
| Finland | 1379 (8.2%) | 586 (3.5%) | 1101 (6.6%) | 263 (1.6%) | 1 (0.0%) | 0 (0.0%) | 0 (0.0%) | 924 (5.5%) | 578 (3.4%) | 191 (1.1%) | 26.5% |
| France (metropolitan) | 20460 (10.2%) | 7093 (3.5%) | 9293 (4.6%) | 7123 (3.6%) | 104 (0.1%) | 0 (0.0%) | 470 (0.2%) | 6106 (3.0%) | 8943 (4.5%) | 2993 (1.5%) | 27.5% |
| French Guyana | 15 (6.4%) | 4 (1.7%) | 0 (0.0%) | 0 (0.0%) | 0 (0.0%) | 0 (0.0%) | 0 (0.0%) | 0 (0.0%) | 29 (12.2%) | 0 (0.0%) | 19.2% |
| French Polynesia | 28 (6.9%) | 1 (0.3%) | 25 (6.2%) | 0 (0.0%) | 0 (0.0%) | 0 (0.0%) | 0 (0.0%) | 0 (0.0%) | 31 (7.7%) | 0 (0.0%) | 19.7% |
| Djibouti | 10 (2.0%) | 1 (0.1%) | 11 (2.3%) | 10 (2.1%) | 0 (0.0%) | 0 (0.0%) | 1 (0.2%) | 0 (0.0%) | 91 (18.8%) | 0 (0.0%) | 24.1% |
| Gabon | 15 (1.3%) | 31 (2.8%) | 38 (3.4%) | 22 (2.0%) | 1 (0.1%) | 27 (2.4%) | 3 (0.3%) | 0 (0.0%) | 366 (32.8%) | 0 (0.0%) | 40.6% |
| Georgia | 144 (2.3%) | 150 (2.4%) | 499 (8.1%) | 98 (1.6%) | 0 (0.0%) | 142 (2.3%) | 26 (0.4%) | 0 (0.0%) | 716 (11.6%) | 30 (0.5%) | 26.2% |
| The Republic of the Gambia | 6 (0.9%) | 3 (0.5%) | 8 (1.2%) | 6 (0.9%) | 0 (0.0%) | 2 (0.3%) | 1 (0.1%) | 0 (0.0%) | 382 (56.7%) | 0 (0.0%) | 58.3% |
| Gaza Strip and West Bank | 37 (1.5%) | 9 (0.4%) | 0 (0.0%) | 94 (3.8%) | 0 (0.0%) | 63 (2.5%) | 16 (0.6%) | 0 (0.0%) | 187 (7.5%) | 0 (0.0%) | 15.3% |
| Germany | 31187 (12.4%) | 8240 (3.3%) | 16194 (6.4%) | 4108 (1.6%) | 18 (0.0%) | 0 (0.0%) | 802 (0.3%) | 8074 (3.2%) | 13986 (5.6%) | 3912 (1.6%) | 30.0% |
| Ghana | 169 (1.1%) | 232 (1.5%) | 419 (2.6%) | 267 (1.7%) | 1 (0.0%) | 172 (1.1%) | 59 (0.4%) | 0 (0.0%) | 4701 (29.6%) | 8 (0.0%) | 35.3% |
| Greece | 3469 (12.4%) | 750 (2.7%) | 2241 (8.0%) | 1036 (3.7%) | 2 (0.0%) | 0 (0.0%) | 143 (0.5%) | 335 (1.2%) | 1514 (5.4%) | 163 (0.6%) | 30.2% |
| France, Guadeloupe | 52 (6.7%) | 14 (1.8%) | 0 (0.0%) | 0 (0.0%) | 0 (0.0%) | 0 (0.0%) | 0 (0.0%) | 0 (0.0%) | 87 (11.2%) | 0 (0.0%) | 18.6% |
| Guam | 19 (9.7%) | 1 (0.3%) | 0 (0.0%) | 0 (0.0%) | 0 (0.1%) | 0 (0.0%) | 0 (0.0%) | 0 (0.0%) | 27 (14.2%) | 0 (0.0%) | 22.9% |
| Guatemala | 256 (2.6%) | 67 (0.7%) | 367 (3.8%) | 165 (1.7%) | 0 (0.0%) | 69 (0.7%) | 32 (0.3%) | 0 (0.0%) | 2910 (29.9%) | 6 (0.1%) | 36.5% |
| Guinea | 99 (1.8%) | 6 (0.1%) | 44 (0.8%) | 39 (0.7%) | 1 (0.0%) | 11 (0.2%) | 18 (0.3%) | 0 (0.0%) | 3169 (57.5%) | 0 (0.0%) | 59.2% |
| Guyana | 18 (2.7%) | 7 (1.1%) | 40 (5.8%) | 22 (3.2%) | 0 (0.0%) | 7 (1.0%) | 0 (0.0%) | 0 (0.0%) | 150 (21.8%) | 0 (0.0%) | 32.0% |
| Haiti | 163 (2.4%) | 79 (1.2%) | 80 (1.2%) | 141 (2.1%) | 3 (0.0%) | 62 (0.9%) | 0 (0.0%) | 0 (0.0%) | 1325 (19.6%) | 20 (0.3%) | 25.9% |
| Honduras | 183 (3.2%) | 32 (0.6%) | 198 (3.5%) | 130 (2.3%) | 0 (0.0%) | 55 (1.0%) | 21 (0.4%) | 0 (0.0%) | 1261 (22.1%) | 6 (0.1%) | 30.3% |
| Hungary | 5052 (16.8%) | 865 (2.9%) | 1983 (6.6%) | 807 (2.7%) | 1 (0.0%) | 0 (0.0%) | 284 (0.9%) | 463 (1.5%) | 2027 (6.7%) | 270 (0.9%) | 33.8% |
| Iceland | 109 (13.3%) | 11 (1.4%) | 43 (5.3%) | 26 (3.2%) | 0 (0.0%) | 0 (0.0%) | 0 (0.0%) | 21 (2.6%) | 39 (4.8%) | 7 (0.8%) | 27.9% |
| India | 17940 (2.5%) | 8422 (1.2%) | 1431 (0.2%) | 20887 (2.9%) | 18506 (2.6%) | 4301 (0.6%) | 7419 (1.0%) | 0 (0.0%) | 158358 (22.1%) | 2404 (0.3%) | 30.5% |
| Indonesia | 4511 (2.1%) | 204 (0.1%) | 2768 (1.3%) | 3020 (1.4%) | 419 (0.2%) | 2386 (1.1%) | 830 (0.4%) | 0 (0.0%) | 45367 (20.9%) | 929 (0.4%) | 26.3% |
| Iran, Islamic Republic of | 1740 (2.9%) | 96 (0.2%) | 2372 (4.0%) | 2206 (3.7%) | 8 (0.0%) | 0 (0.0%) | 523 (0.9%) | 0 (0.0%) | 6663 (11.2%) | 22 (0.0%) | 21.1% |
| Iraq | 413 (1.9%) | 18 (0.1%) | 1337 (6.3%) | 1101 (5.1%) | 0 (0.0%) | 593 (2.8%) | 98 (0.5%) | 0 (0.0%) | 1386 (6.5%) | 10 (0.0%) | 21.2% |
| Ireland | 1771 (14.2%) | 403 (3.2%) | 775 (6.2%) | 433 (3.5%) | 2 (0.0%) | 0 (0.0%) | 0 (0.0%) | 649 (5.2%) | 502 (4.0%) | 114 (0.9%) | 32.2% |
| Israel | 1292 (8.3%) | 91 (0.6%) | 1042 (6.7%) | 490 (3.1%) | 2 (0.0%) | 0 (0.0%) | 118 (0.8%) | 0 (0.0%) | 928 (6.0%) | 115 (0.7%) | 23.7% |
| Italy | 19884 (10.2%) | 3379 (1.7%) | 10398 (5.4%) | 8585 (4.4%) | 29 (0.0%) | 0 (0.0%) | 1087 (0.6%) | 4352 (2.2%) | 12223 (6.3%) | 3943 (2.0%) | 28.8% |
| Côte d'Ivoire | 214 (1.9%) | 195 (1.7%) | 178 (1.6%) | 252 (2.2%) | 4 (0.0%) | 149 (1.3%) | 22 (0.2%) | 0 (0.0%) | 3392 (29.7%) | 0 (0.0%) | 35.8% |
| Jamaica | 161 (4.3%) | 31 (0.8%) | 358 (9.5%) | 149 (4.0%) | 1 (0.0%) | 91 (2.4%) | 8 (0.2%) | 0 (0.0%) | 528 (14.1%) | 0 (0.0%) | 31.0% |
| Japan | 32520 (7.8%) | 7251 (1.7%) | 2488 (0.6%) | 14681 (3.5%) | 65 (0.0%) | 0 (0.0%) | 828 (0.2%) | 0 (0.0%) | 58372 (13.9%) | 4407 (1.1%) | 26.1% |
| Kazakhstan | 509 (2.8%) | 424 (2.4%) | 1197 (6.7%) | 295 (1.6%) | 61 (0.3%) | 324 (1.8%) | 117 (0.7%) | 0 (0.0%) | 3151 (17.6%) | 77 (0.4%) | 30.6% |
| Jordan | 197 (3.0%) | 7 (0.1%) | 479 (7.3%) | 184 (2.8%) | 0 (0.0%) | 207 (3.2%) | 24 (0.4%) | 0 (0.0%) | 406 (6.2%) | 1 (0.0%) | 21.0% |
| Kenya | 466 (1.7%) | 382 (1.4%) | 495 (1.8%) | 227 (0.8%) | 67 (0.2%) | 196 (0.7%) | 10 (0.0%) | 0 (0.0%) | 7871 (28.1%) | 45 (0.2%) | 32.8% |
| Korea, Democratic People Republic of | 2099 (6.6%) | 196 (0.6%) | 598 (1.9%) | 826 (2.6%) | 0 (0.0%) | 0 (0.0%) | 2279 (7.1%) | 0 (0.0%) | 4980 (15.6%) | 535 (1.7%) | 31.6% |
| Korea, Republic of | 5418 (5.1%) | 2253 (2.1%) | 1597 (1.5%) | 4090 (3.8%) | 8 (0.0%) | 0 (0.0%) | 1322 (1.2%) | 0 (0.0%) | 14546 (13.6%) | 574 (0.5%) | 25.3% |
| Kuwait | 30 (1.4%) | 0 (0.0%) | 192 (8.6%) | 138 (6.2%) | 0 (0.0%) | 0 (0.0%) | 20 (0.9%) | 0 (0.0%) | 142 (6.4%) | 5 (0.2%) | 21.8% |
| Kyrgyzstan | 126 (3.4%) | 62 (1.6%) | 213 (5.7%) | 53 (1.4%) | 1 (0.0%) | 41 (1.1%) | 54 (1.4%) | 0 (0.0%) | 796 (21.2%) | 3 (0.1%) | 32.2% |
| Lao People's Democratic Republic | 147 (3.3%) | 82 (1.8%) | 32 (0.7%) | 70 (1.6%) | 38 (0.8%) | 49 (1.1%) | 26 (0.6%) | 0 (0.0%) | 914 (20.5%) | 7 (0.1%) | 28.2% |
| Lebanon | 704 (11.1%) | 21 (0.3%) | 380 (6.0%) | 297 (4.7%) | 2 (0.0%) | 186 (2.9%) | 64 (1.0%) | 0 (0.0%) | 361 (5.7%) | 1 (0.0%) | 28.1% |
| Lesotho | 59 (4.7%) | 17 (1.3%) | 27 (2.1%) | 5 (0.4%) | 4 (0.3%) | 10 (0.8%) | 2 (0.2%) | 0 (0.0%) | 700 (55.1%) | 0 (0.0%) | 59.3% |
| Latvia | 325 (6.1%) | 137 (2.6%) | 409 (7.7%) | 71 (1.3%) | 0 (0.0%) | 0 (0.0%) | 9 (0.2%) | 98 (1.8%) | 477 (8.9%) | 22 (0.4%) | 25.9% |
| Liberia | 31 (1.3%) | 28 (1.2%) | 48 (2.1%) | 37 (1.6%) | 2 (0.1%) | 21 (0.9%) | 5 (0.2%) | 0 (0.0%) | 942 (41.2%) | 0 (0.0%) | 45.5% |
| Libya | 21 (0.5%) | 0 (0.0%) | 234 (5.7%) | 151 (3.7%) | 0 (0.0%) | 0 (0.0%) | 14 (0.3%) | 0 (0.0%) | 553 (13.6%) | 0 (0.0%) | 22.2% |
| Lithuania | 359 (5.1%) | 244 (3.5%) | 557 (7.9%) | 122 (1.7%) | 0 (0.0%) | 0 (0.0%) | 7 (0.1%) | 115 (1.6%) | 634 (9.0%) | 37 (0.5%) | 26.3% |
| Luxembourg | 166 (11.2%) | 51 (3.5%) | 80 (5.5%) | 36 (2.4%) | 0 (0.0%) | 0 (0.0%) | 2 (0.1%) | 46 (3.1%) | 66 (4.4%) | 11 (0.7%) | 27.5% |
| Madagascar | 162 (1.3%) | 50 (0.4%) | 0 (0.0%) | 114 (0.9%) | 26 (0.2%) | 65 (0.5%) | 7 (0.1%) | 0 (0.0%) | 5032 (40.4%) | 8 (0.1%) | 42.4% |
| Malawi | 253 (2.1%) | 101 (0.8%) | 28 (0.2%) | 30 (0.2%) | 10 (0.1%) | 18 (0.1%) | 4 (0.0%) | 0 (0.0%) | 6418 (52.5%) | 0 (0.0%) | 54.2% |
| Malaysia | 415 (1.6%) | 69 (0.3%) | 1115 (4.2%) | 1071 (4.0%) | 10 (0.0%) | 0 (0.0%) | 131 (0.5%) | 0 (0.0%) | 3240 (12.2%) | 102 (0.4%) | 21.5% |
| Maldives | 7 (3.1%) | 1 (0.3%) | 9 (3.7%) | 6 (2.6%) | 0 (0.0%) | 3 (1.3%) | 0 (0.0%) | 0 (0.0%) | 60 (26.2%) | 0 (0.0%) | 34.1% |
| Mali | 126 (1.3%) | 16 (0.2%) | 52 (0.6%) | 212 (2.2%) | 1 (0.0%) | 71 (0.8%) | 23 (0.2%) | 0 (0.0%) | 3507 (37.2%) | 4 (0.0%) | 40.5% |
| Malta | 87 (6.7%) | 20 (1.5%) | 99 (7.7%) | 57 (4.4%) | 1 (0.1%) | 0 (0.0%) | 2 (0.2%) | 23 (1.8%) | 47 (3.6%) | 4 (0.3%) | 23.7% |
| France, Martinique | 54 (6.4%) | 16 (1.9%) | 0 (0.0%) | 0 (0.0%) | 0 (0.0%) | 0 (0.0%) | 0 (0.0%) | 0 (0.0%) | 88 (10.6%) | 0 (0.0%) | 17.9% |
| Mauritania | 37 (1.9%) | 0 (0.0%) | 67 (3.4%) | 80 (4.1%) | 12 (0.6%) | 22 (1.1%) | 4 (0.2%) | 0 (0.0%) | 654 (33.2%) | 0 (0.0%) | 40.4% |
| Mauritius | 29 (1.9%) | 14 (0.9%) | 97 (6.2%) | 49 (3.1%) | 10 (0.7%) | 0 (0.0%) | 0 (0.0%) | 0 (0.0%) | 201 (12.8%) | 0 (0.0%) | 23.4% |
| Mexico | 2909 (2.7%) | 1430 (1.3%) | 6829 (6.3%) | 2345 (2.2%) | 5 (0.0%) | 2182 (2.0%) | 320 (0.3%) | 0 (0.0%) | 16360 (15.2%) | 476 (0.4%) | 27.5% |
| Mongolia | 145 (4.6%) | 109 (3.4%) | 201 (6.3%) | 15 (0.5%) | 0 (0.0%) | 8 (0.3%) | 29 (0.9%) | 0 (0.0%) | 1406 (44.3%) | 2 (0.1%) | 52.7% |
| Moldova | 183 (3.0%) | 266 (4.4%) | 527 (8.7%) | 66 (1.1%) | 0 (0.0%) | 130 (2.1%) | 12 (0.2%) | 37 (0.6%) | 743 (12.3%) | 4 (0.1%) | 28.8% |
| Montenegro | 178 (14.5%) | 38 (3.1%) | 80 (6.6%) | 30 (2.4%) | 0 (0.0%) | 39 (3.2%) | 15 (1.2%) | 34 (2.8%) | 93 (7.6%) | 0 (0.0%) | 35.1% |
| Morocco | 224 (0.7%) | 59 (0.2%) | 1387 (4.3%) | 938 (2.9%) | 1 (0.0%) | 911 (2.8%) | 26 (0.1%) | 0 (0.0%) | 4454 (13.6%) | 43 (0.1%) | 22.8% |
| Mozambique | 370 (2.3%) | 74 (0.5%) | 66 (0.4%) | 49 (0.3%) | 12 (0.1%) | 55 (0.3%) | 4 (0.0%) | 0 (0.0%) | 7874 (49.6%) | 2 (0.0%) | 51.6% |
| Oman | 11 (0.7%) | 2 (0.1%) | 46 (2.9%) | 60 (3.9%) | 0 (0.0%) | 0 (0.0%) | 7 (0.5%) | 0 (0.0%) | 184 (11.8%) | 0 (0.0%) | 18.8% |
| Namibia | 85 (4.7%) | 41 (2.3%) | 47 (2.6%) | 50 (2.8%) | 3 (0.1%) | 32 (1.8%) | 1 (0.1%) | 0 (0.0%) | 519 (28.6%) | 0 (0.0%) | 38.2% |
| Nepal | 1050 (8.7%) | 38 (0.3%) | 22 (0.2%) | 71 (0.6%) | 60 (0.5%) | 16 (0.1%) | 208 (1.7%) | 0 (0.0%) | 2792 (23.1%) | 73 (0.6%) | 32.6% |
| The Netherlands | 9171 (16.6%) | 1525 (2.8%) | 2537 (4.6%) | 905 (1.6%) | 2 (0.0%) | 0 (0.0%) | 223 (0.4%) | 3630 (6.6%) | 2047 (3.7%) | 1219 (2.2%) | 33.2% |
| New Caledonia | 35 (7.0%) | 2 (0.3%) | 0 (0.0%) | 0 (0.0%) | 0 (0.0%) | 0 (0.0%) | 0 (0.0%) | 0 (0.0%) | 44 (8.6%) | 0 (0.0%) | 15.3% |
| Vanuatu | 2 (1.3%) | 0 (0.2%) | 5 (3.8%) | 1 (0.7%) | 0 (0.0%) | 2 (1.4%) | 0 (0.0%) | 0 (0.0%) | 29 (20.3%) | 0 (0.0%) | 26.0% |
| New Zealand | 1223 (9.6%) | 405 (3.2%) | 773 (6.0%) | 295 (2.3%) | 1 (0.0%) | 0 (0.0%) | 0 (0.0%) | 1098 (8.6%) | 464 (3.6%) | 179 (1.4%) | 30.2% |
| Nicaragua | 107 (2.3%) | 40 (0.9%) | 256 (5.6%) | 133 (2.9%) | 0 (0.0%) | 63 (1.4%) | 12 (0.3%) | 0 (0.0%) | 1058 (23.0%) | 0 (0.0%) | 32.8% |
| Niger | 20 (0.3%) | 3 (0.0%) | 15 (0.2%) | 115 (1.8%) | 4 (0.1%) | 51 (0.8%) | 1 (0.0%) | 0 (0.0%) | 1141 (17.5%) | 2 (0.0%) | 20.2% |
| Nigeria | 501 (0.6%) | 2279 (2.9%) | 1371 (1.8%) | 1733 (2.2%) | 14 (0.0%) | 1291 (1.7%) | 275 (0.4%) | 0 (0.0%) | 18735 (24.0%) | 74 (0.1%) | 31.1% |
| Norway | 1662 (9.6%) | 369 (2.1%) | 926 (5.4%) | 616 (3.6%) | 0 (0.0%) | 0 (0.0%) | 0 (0.0%) | 1405 (8.1%) | 730 (4.2%) | 209 (1.2%) | 29.9% |
| Pakistan | 1897 (2.0%) | 58 (0.1%) | 2256 (2.3%) | 3516 (3.7%) | 2014 (2.1%) | 1009 (1.0%) | 623 (0.6%) | 0 (0.0%) | 10140 (10.5%) | 159 (0.2%) | 20.8% |
| Panama | 109 (2.7%) | 59 (1.5%) | 254 (6.2%) | 168 (4.1%) | 0 (0.0%) | 38 (0.9%) | 5 (0.1%) | 0 (0.0%) | 619 (15.2%) | 0 (0.0%) | 27.6% |
| Papua New Guinea | 435 (6.7%) | 23 (0.4%) | 170 (2.6%) | 83 (1.3%) | 368 (5.7%) | 39 (0.6%) | 0 (0.0%) | 0 (0.0%) | 1420 (22.0%) | 8 (0.1%) | 34.7% |
| Paraguay | 416 (6.2%) | 114 (1.7%) | 288 (4.3%) | 188 (2.8%) | 2 (0.0%) | 153 (2.3%) | 8 (0.1%) | 28 (0.4%) | 1385 (20.8%) | 7 (0.1%) | 34.1% |
| Peru | 519 (1.4%) | 530 (1.4%) | 1512 (4.0%) | 776 (2.1%) | 11 (0.0%) | 293 (0.8%) | 234 (0.6%) | 0 (0.0%) | 8194 (21.7%) | 186 (0.5%) | 29.8% |
| Philippines | 5491 (5.2%) | 1710 (1.6%) | 1490 (1.4%) | 3427 (3.3%) | 90 (0.1%) | 1786 (1.7%) | 776 (0.7%) | 0 (0.0%) | 13356 (12.7%) | 520 (0.5%) | 24.6% |
| Poland | 14621 (15.2%) | 2457 (2.6%) | 6771 (7.1%) | 2873 (3.0%) | 0 (0.0%) | 0 (0.0%) | 1309 (1.4%) | 820 (0.9%) | 7481 (7.8%) | 1107 (1.2%) | 33.6% |
| Portugal | 1467 (4.8%) | 1072 (3.5%) | 1571 (5.2%) | 1421 (4.7%) | 0 (0.0%) | 0 (0.0%) | 0 (0.0%) | 382 (1.3%) | 2615 (8.6%) | 138 (0.5%) | 25.4% |
| Guinea-Bissau | 6 (0.8%) | 7 (0.9%) | 11 (1.6%) | 9 (1.2%) | 0 (0.0%) | 5 (0.7%) | 2 (0.3%) | 0 (0.0%) | 296 (40.7%) | 0 (0.0%) | 43.9% |
| Timor-Leste | 10 (2.2%) | 0 (0.1%) | 0 (0.0%) | 11 (2.4%) | 4 (0.9%) | 6 (1.3%) | 2 (0.4%) | 0 (0.0%) | 102 (22.7%) | 0 (0.0%) | 28.2% |
| Puerto Rico | 285 (4.7%) | 114 (1.9%) | 504 (8.4%) | 233 (3.9%) | 0 (0.0%) | 0 (0.0%) | 0 (0.0%) | 0 (0.0%) | 412 (6.9%) | 0 (0.0%) | 23.4% |
| Qatar | 4 (0.6%) | 1 (0.2%) | 42 (6.6%) | 37 (5.8%) | 0 (0.0%) | 8 (1.3%) | 6 (0.9%) | 0 (0.0%) | 53 (8.3%) | 0 (0.0%) | 21.8% |
| France, La Réunion | 25 (2.0%) | 13 (1.0%) | 0 (0.0%) | 0 (0.0%) | 5 (0.4%) | 0 (0.0%) | 0 (0.0%) | 0 (0.0%) | 161 (12.9%) | 0 (0.0%) | 15.9% |
| Romania | 3957 (8.7%) | 1790 (3.9%) | 2868 (6.3%) | 1173 (2.6%) | 2 (0.0%) | 0 (0.0%) | 187 (0.4%) | 622 (1.4%) | 5578 (12.2%) | 249 (0.5%) | 31.3% |
| Russian Federation | 16108 (5.0%) | 11805 (3.7%) | 26675 (8.3%) | 3719 (1.2%) | 17 (0.0%) | 0 (0.0%) | 27 (0.0%) | 3977 (1.2%) | 37505 (11.7%) | 2336 (0.7%) | 28.2% |
| Rwanda | 224 (6.0%) | 75 (2.0%) | 6 (0.2%) | 32 (0.9%) | 4 (0.1%) | 9 (0.2%) | 12 (0.3%) | 0 (0.0%) | 1383 (37.0%) | 0 (0.0%) | 43.0% |
| Saint Lucia | 6 (3.2%) | 4 (2.1%) | 13 (7.1%) | 4 (2.2%) | 0 (0.0%) | 5 (2.7%) | 0 (0.0%) | 0 (0.0%) | 28 (15.2%) | 0 (0.0%) | 29.0% |
| Sao Tome and Principe | 1 (1.9%) | 1 (1.9%) | 2 (3.3%) | 1 (1.5%) | 0 (0.0%) | 1 (1.5%) | 1 (1.5%) | 0 (0.0%) | 21 (30.7%) | 0 (0.0%) | 38.4% |
| Saudi Arabia | 116 (0.9%) | 2 (0.0%) | 865 (6.5%) | 603 (4.6%) | 3 (0.0%) | 0 (0.0%) | 95 (0.7%) | 0 (0.0%) | 1034 (7.8%) | 3 (0.0%) | 19.1% |
| Senegal | 50 (0.7%) | 7 (0.1%) | 121 (1.6%) | 111 (1.5%) | 3 (0.0%) | 39 (0.5%) | 19 (0.3%) | 0 (0.0%) | 2830 (38.1%) | 0 (0.0%) | 41.0% |
| Serbia | 3001 (16.2%) | 505 (2.7%) | 1078 (5.8%) | 883 (4.8%) | 1 (0.0%) | 453 (2.4%) | 316 (1.7%) | 172 (0.9%) | 1527 (8.2%) | 121 (0.7%) | 36.7% |
| Sierra Leone | 36 (3.4%) | 11 (1.0%) | 8 (0.8%) | 9 (0.9%) | 0 (0.0%) | 6 (0.6%) | 0 (0.0%) | 0 (0.0%) | 607 (58.2%) | 0 (0.0%) | 60.9% |
| Singapore | 532 (4.5%) | 63 (0.5%) | 290 (2.5%) | 275 (2.3%) | 2 (0.0%) | 0 (0.0%) | 42 (0.4%) | 0 (0.0%) | 965 (8.2%) | 47 (0.4%) | 17.7% |
| Slovakia | 1007 (7.6%) | 390 (2.9%) | 957 (7.2%) | 301 (2.3%) | 3 (0.0%) | 0 (0.0%) | 68 (0.5%) | 315 (2.4%) | 1056 (7.9%) | 41 (0.3%) | 27.4% |
| Viet Nam | 1680 (2.0%) | 999 (1.2%) | 45 (0.1%) | 1998 (2.4%) | 49 (0.1%) | 1540 (1.8%) | 710 (0.8%) | 0 (0.0%) | 15772 (18.7%) | 724 (0.9%) | 25.9% |
| Slovenia | 788 (12.6%) | 162 (2.6%) | 352 (5.6%) | 125 (2.0%) | 1 (0.0%) | 0 (0.0%) | 50 (0.8%) | 246 (3.9%) | 347 (5.5%) | 78 (1.2%) | 30.0% |
| Somalia | 95 (1.5%) | 9 (0.1%) | 93 (1.4%) | 112 (1.7%) | 10 (0.1%) | 110 (1.7%) | 5 (0.1%) | 0 (0.0%) | 1641 (25.1%) | 9 (0.1%) | 30.0% |
| South Africa | 3516 (6.5%) | 1294 (2.4%) | 3144 (5.8%) | 2132 (3.9%) | 85 (0.2%) | 1074 (2.0%) | 245 (0.4%) | 0 (0.0%) | 13914 (25.6%) | 414 (0.8%) | 40.5% |
| Zimbabwe | 442 (4.0%) | 70 (0.6%) | 262 (2.4%) | 108 (1.0%) | 2 (0.0%) | 98 (0.9%) | 5 (0.0%) | 0 (0.0%) | 4783 (43.6%) | 2 (0.0%) | 48.5% |
| Spain | 11337 (9.9%) | 3101 (2.7%) | 6523 (5.7%) | 3767 (3.3%) | 112 (0.1%) | 0 (0.0%) | 131 (0.1%) | 1431 (1.2%) | 6332 (5.5%) | 879 (0.8%) | 26.1% |
| South Sudan | 59 (1.5%) | 54 (1.4%) | 0 (0.0%) | 55 (1.4%) | 0 (0.0%) | 45 (1.1%) | 6 (0.2%) | 0 (0.0%) | 1104 (28.0%) | 1 (0.0%) | 31.9% |
| Sudan | 127 (0.7%) | 17 (0.1%) | 573 (3.4%) | 382 (2.2%) | 1 (0.0%) | 201 (1.2%) | 27 (0.2%) | 0 (0.0%) | 2169 (12.8%) | 0 (0.0%) | 19.4% |
| Suriname | 36 (6.7%) | 7 (1.3%) | 25 (4.6%) | 24 (4.4%) | 0 (0.1%) | 14 (2.6%) | 1 (0.2%) | 0 (0.0%) | 99 (18.4%) | 0 (0.0%) | 33.4% |
| Eswatini | 24 (3.2%) | 5 (0.7%) | 14 (1.8%) | 7 (0.9%) | 0 (0.0%) | 8 (1.1%) | 0 (0.0%) | 0 (0.0%) | 485 (65.4%) | 0 (0.0%) | 68.0% |
| Sweden | 3634 (12.9%) | 629 (2.2%) | 1330 (4.7%) | 460 (1.6%) | 0 (0.0%) | 0 (0.0%) | 0 (0.0%) | 2284 (8.1%) | 1210 (4.3%) | 348 (1.2%) | 30.7% |
| Switzerland | 2843 (12.9%) | 666 (3.0%) | 794 (3.6%) | 555 (2.5%) | 7 (0.0%) | 0 (0.0%) | 33 (0.2%) | 899 (4.1%) | 1002 (4.6%) | 309 (1.4%) | 28.6% |
| Syrian Arab Republic | 300 (2.6%) | 14 (0.1%) | 826 (7.1%) | 445 (3.8%) | 0 (0.0%) | 250 (2.2%) | 77 (0.7%) | 0 (0.0%) | 729 (6.3%) | 10 (0.1%) | 20.9% |
| Tajikistan | 43 (1.2%) | 13 (0.4%) | 130 (3.7%) | 85 (2.4%) | 1 (0.0%) | 32 (0.9%) | 52 (1.5%) | 0 (0.0%) | 713 (20.4%) | 1 (0.0%) | 28.3% |
| Thailand | 3260 (3.6%) | 1567 (1.7%) | 2626 (2.9%) | 1765 (1.9%) | 615 (0.7%) | 1763 (1.9%) | 1047 (1.1%) | 0 (0.0%) | 14217 (15.5%) | 584 (0.6%) | 27.0% |
| Togo | 56 (1.9%) | 19 (0.6%) | 60 (2.0%) | 38 (1.3%) | 3 (0.1%) | 19 (0.6%) | 4 (0.1%) | 0 (0.0%) | 781 (26.0%) | 0 (0.0%) | 30.8% |
| Trinidad and Tobago | 68 (3.5%) | 27 (1.4%) | 174 (8.9%) | 76 (3.9%) | 0 (0.0%) | 23 (1.2%) | 0 (0.0%) | 0 (0.0%) | 248 (12.6%) | 1 (0.1%) | 28.1% |
| United Arab Emirates | 47 (1.6%) | 10 (0.3%) | 206 (7.1%) | 180 (6.2%) | 0 (0.0%) | 0 (0.0%) | 16 (0.6%) | 0 (0.0%) | 245 (8.5%) | 1 (0.0%) | 22.3% |
| Tunisia | 154 (1.7%) | 21 (0.2%) | 448 (5.0%) | 255 (2.9%) | 4 (0.0%) | 205 (2.3%) | 45 (0.5%) | 0 (0.0%) | 993 (11.1%) | 0 (0.0%) | 21.9% |
| Türkiye | 6458 (6.2%) | 311 (0.3%) | 8025 (7.7%) | 4157 (4.0%) | 4 (0.0%) | 1379 (1.3%) | 832 (0.8%) | 0 (0.0%) | 8411 (8.0%) | 1156 (1.1%) | 26.2% |
| Turkmenistan | 93 (2.6%) | 65 (1.8%) | 159 (4.4%) | 43 (1.2%) | 0 (0.0%) | 62 (1.7%) | 26 (0.7%) | 0 (0.0%) | 695 (19.2%) | 0 (0.0%) | 28.7% |
| Uganda | 535 (2.6%) | 620 (3.1%) | 86 (0.4%) | 67 (0.3%) | 22 (0.1%) | 102 (0.5%) | 47 (0.2%) | 0 (0.0%) | 9768 (48.2%) | 17 (0.1%) | 51.9% |
| Ukraine | 2891 (3.8%) | 2444 (3.2%) | 5483 (7.1%) | 681 (0.9%) | 0 (0.0%) | 1375 (1.8%) | 154 (0.2%) | 1059 (1.4%) | 8904 (11.6%) | 413 (0.5%) | 27.1% |
| North Macedonia | 399 (12.4%) | 48 (1.5%) | 209 (6.5%) | 101 (3.1%) | 0 (0.0%) | 87 (2.7%) | 52 (1.6%) | 43 (1.3%) | 262 (8.1%) | 4 (0.1%) | 32.2% |
| Egypt | 430 (0.6%) | 62 (0.1%) | 7102 (9.3%) | 2497 (3.3%) | 0 (0.0%) | 1463 (1.9%) | 721 (0.9%) | 0 (0.0%) | 13470 (17.7%) | 167 (0.2%) | 30.5% |
| United Kingdom | 31659 (15.8%) | 6597 (3.3%) | 12584 (6.3%) | 6220 (3.1%) | 103 (0.1%) | 0 (0.0%) | 457 (0.2%) | 7864 (3.9%) | 7813 (3.9%) | 584 (0.3%) | 32.2% |
| Tanzania, United Republic of | 1982 (7.6%) | 488 (1.9%) | 220 (0.8%) | 92 (0.4%) | 30 (0.1%) | 116 (0.4%) | 18 (0.1%) | 0 (0.0%) | 12839 (49.0%) | 21 (0.1%) | 54.6% |
| United States of America | 128236 (14.2%) | 20020 (2.2%) | 77045 (8.5%) | 35406 (3.9%) | 68 (0.0%) | 15063 (1.7%) | 0 (0.0%) | 32964 (3.7%) | 40195 (4.5%) | 11126 (1.2%) | 34.1% |
| Burkina Faso | 44 (0.5%) | 132 (1.5%) | 8 (0.1%) | 73 (0.8%) | 29 (0.3%) | 14 (0.2%) | 59 (0.7%) | 0 (0.0%) | 2099 (23.8%) | 10 (0.1%) | 27.0% |
| Uruguay | 743 (9.6%) | 190 (2.5%) | 538 (7.0%) | 244 (3.2%) | 0 (0.0%) | 72 (0.9%) | 0 (0.0%) | 0 (0.0%) | 686 (8.9%) | 29 (0.4%) | 28.5% |
| Uzbekistan | 272 (1.4%) | 151 (0.8%) | 935 (4.7%) | 303 (1.5%) | 13 (0.1%) | 236 (1.2%) | 217 (1.1%) | 0 (0.0%) | 4050 (20.6%) | 48 (0.2%) | 29.0% |
| Venezuela | 1863 (6.3%) | 517 (1.7%) | 1513 (5.1%) | 1220 (4.1%) | 8 (0.0%) | 0 (0.0%) | 187 (0.6%) | 0 (0.0%) | 5364 (18.0%) | 112 (0.4%) | 32.0% |
| Samoa | 15 (7.2%) | 1 (0.6%) | 31 (14.9%) | 6 (2.9%) | 0 (0.0%) | 2 (1.0%) | 0 (0.0%) | 0 (0.0%) | 17 (8.1%) | 0 (0.0%) | 30.6% |
| Yemen | 388 (4.2%) | 7 (0.1%) | 96 (1.0%) | 227 (2.5%) | 37 (0.4%) | 118 (1.3%) | 81 (0.9%) | 0 (0.0%) | 920 (10.0%) | 2 (0.0%) | 19.0% |
| Zambia | 303 (3.5%) | 60 (0.7%) | 52 (0.6%) | 55 (0.6%) | 9 (0.1%) | 35 (0.4%) | 6 (0.1%) | 0 (0.0%) | 5003 (57.2%) | 2 (0.0%) | 59.7% |

**Table 5.1.2**. Unadjusted population-attributable fractions and attributable cases, by country and risk factor for men

| **Country** | **Tobacco Smoking** | **Alcohol consumption** | **High Body Mass Index** | **Insufficient physical activity** | **Smokeless Tobacco and Areca Nut** | **Air Pollution** | **Ultraviolet Radiation** | **Infections** | **Occupational** | **Total PAF - All risk factors combined** |
| --- | --- | --- | --- | --- | --- | --- | --- | --- | --- | --- |
|  | **N (PAF)** | **N (PAF)** | **N (PAF)** | **N (PAF)** | **N (PAF)** | **N (PAF)** | **N (PAF)** | **N (PAF)** | **N (PAF)** |  |
| Afghanistan | 1556 (14.2%) | 40 (0.4%) | 25 (0.2%) | 10 (0.1%) | 566 (5.2%) | 402 (3.7%) | 0 (0.0%) | 1388 (12.6%) | 170 (1.6%) | 33.0% |
| Albania | 1882 (42.8%) | 135 (3.1%) | 102 (2.3%) | 6 (0.1%) | 1 (0.0%) | 109 (2.5%) | 19 (0.4%) | 464 (10.6%) | 95 (2.2%) | 54.1% |
| Algeria | 7690 (26.9%) | 95 (0.3%) | 306 (1.1%) | 98 (0.3%) | 53 (0.2%) | 449 (1.6%) | 0 (0.0%) | 3064 (10.7%) | 508 (1.8%) | 38.1% |
| Angola | 894 (8.6%) | 822 (7.9%) | 13 (0.1%) | 6 (0.1%) | 17 (0.2%) | 25 (0.2%) | 0 (0.0%) | 1495 (14.4%) | 9 (0.1%) | 28.5% |
| Azerbaijan | 3604 (37.2%) | 229 (2.4%) | 223 (2.3%) | 22 (0.2%) | 1 (0.0%) | 369 (3.8%) | 0 (0.0%) | 1386 (14.3%) | 162 (1.7%) | 51.6% |
| Argentina | 13382 (21.3%) | 2636 (4.2%) | 2457 (3.9%) | 507 (0.8%) | 2 (0.0%) | 216 (0.3%) | 430 (0.7%) | 3744 (6.0%) | 2073 (3.3%) | 35.4% |
| Australia | 9824 (12.1%) | 3868 (4.8%) | 2463 (3.0%) | 289 (0.4%) | 31 (0.0%) | 0 (0.0%) | 10536 (13.0%) | 3736 (4.6%) | 4388 (5.4%) | 36.6% |
| Austria | 5421 (22.2%) | 1200 (4.9%) | 648 (2.7%) | 87 (0.4%) | 21 (0.1%) | 108 (0.4%) | 1063 (4.3%) | 1157 (4.7%) | 1045 (4.3%) | 37.7% |
| Bahamas | 40 (8.6%) | 9 (1.9%) | 9 (2.0%) | 2 (0.4%) | 0 (0.0%) | 0 (0.0%) | 0 (0.0%) | 34 (7.3%) | 0 (0.0%) | 18.9% |
| Bahrain | 128 (19.8%) | 5 (0.8%) | 10 (1.5%) | 5 (0.8%) | 1 (0.2%) | 20 (3.1%) | 0 (0.0%) | 49 (7.6%) | 14 (2.1%) | 32.0% |
| Bangladesh | 32955 (35.0%) | 985 (1.0%) | 0 (0.0%) | 54 (0.1%) | 6434 (6.8%) | 2975 (3.2%) | 0 (0.0%) | 7851 (8.3%) | 1167 (1.2%) | 47.5% |
| Armenia | 1868 (37.5%) | 156 (3.1%) | 119 (2.4%) | 21 (0.4%) | 0 (0.0%) | 305 (6.1%) | 0 (0.0%) | 473 (9.5%) | 200 (4.0%) | 52.0% |
| Barbados | 53 (9.3%) | 20 (3.6%) | 12 (2.0%) | 3 (0.5%) | 0 (0.0%) | 0 (0.0%) | 0 (0.0%) | 32 (5.6%) | 0 (0.0%) | 19.5% |
| Belgium | 9037 (23.2%) | 1833 (4.7%) | 1080 (2.8%) | 191 (0.5%) | 21 (0.1%) | 214 (0.6%) | 1645 (4.2%) | 1392 (3.6%) | 2705 (7.0%) | 39.6% |
| Bhutan | 53 (15.2%) | 14 (3.9%) | 3 (0.8%) | 0 (0.0%) | 9 (2.5%) | 4 (1.1%) | 0 (0.0%) | 76 (21.7%) | 0 (0.0%) | 39.0% |
| Bolivia | 748 (10.2%) | 177 (2.4%) | 124 (1.7%) | 12 (0.2%) | 0 (0.0%) | 101 (1.4%) | 33 (0.5%) | 779 (10.6%) | 136 (1.9%) | 25.9% |
| Bosnia Herzegovina | 2942 (38.8%) | 313 (4.1%) | 183 (2.4%) | 18 (0.2%) | 3 (0.0%) | 349 (4.6%) | 161 (2.1%) | 502 (6.6%) | 173 (2.3%) | 51.4% |
| Botswana | 137 (15.4%) | 81 (9.1%) | 2 (0.2%) | 1 (0.1%) | 4 (0.5%) | 1 (0.1%) | 0 (0.0%) | 198 (22.2%) | 7 (0.8%) | 41.1% |
| Brazil | 46483 (15.6%) | 16204 (5.4%) | 4784 (1.6%) | 1170 (0.4%) | 229 (0.1%) | 868 (0.3%) | 2893 (1.0%) | 20500 (6.9%) | 4657 (1.6%) | 29.2% |
| Belize | 26 (15.5%) | 6 (3.4%) | 4 (2.1%) | 1 (0.6%) | 0 (0.0%) | 0 (0.0%) | 5 (3.0%) | 14 (8.0%) | 2 (1.3%) | 30.0% |
| Solomon Islands | 40 (14.4%) | 3 (1.2%) | 4 (1.5%) | 0 (0.0%) | 2 (0.5%) | 0 (0.0%) | 0 (0.0%) | 28 (10.1%) | 1 (0.4%) | 25.9% |
| Brunei Darussalam | 89 (23.3%) | 1 (0.2%) | 11 (3.0%) | 2 (0.5%) | 0 (0.0%) | 0 (0.0%) | 0 (0.0%) | 57 (14.9%) | 5 (1.2%) | 37.9% |
| Bulgaria | 5343 (31.8%) | 1030 (6.1%) | 475 (2.8%) | 103 (0.6%) | 0 (0.0%) | 291 (1.7%) | 150 (0.9%) | 1134 (6.7%) | 201 (1.2%) | 44.5% |
| Myanmar | 10133 (28.9%) | 1952 (5.6%) | 55 (0.2%) | 58 (0.2%) | 1167 (3.3%) | 735 (2.1%) | 0 (0.0%) | 7233 (20.7%) | 717 (2.0%) | 50.8% |
| Burundi | 235 (7.1%) | 235 (7.1%) | 1 (0.0%) | 3 (0.1%) | 0 (0.0%) | 14 (0.4%) | 0 (0.0%) | 717 (21.6%) | 1 (0.0%) | 32.7% |
| Belarus | 8352 (34.3%) | 2055 (8.4%) | 660 (2.7%) | 57 (0.2%) | 4 (0.0%) | 246 (1.0%) | 348 (1.4%) | 2033 (8.4%) | 334 (1.4%) | 48.6% |
| Cambodia | 2798 (31.0%) | 796 (8.8%) | 5 (0.1%) | 12 (0.1%) | 14 (0.2%) | 94 (1.0%) | 0 (0.0%) | 2049 (22.7%) | 189 (2.1%) | 53.1% |
| Cameroon | 482 (6.2%) | 451 (5.8%) | 46 (0.6%) | 10 (0.1%) | 17 (0.2%) | 84 (1.1%) | 0 (0.0%) | 2109 (27.0%) | 15 (0.2%) | 36.8% |
| Canada | 25232 (21.2%) | 4717 (4.0%) | 4024 (3.4%) | 554 (0.5%) | 47 (0.0%) | 0 (0.0%) | 5968 (5.0%) | 5384 (4.5%) | 7144 (6.0%) | 38.0% |
| Cape Verde | 15 (7.2%) | 17 (8.2%) | 1 (0.7%) | 1 (0.5%) | 2 (1.0%) | 1 (0.5%) | 0 (0.0%) | 26 (12.4%) | 0 (0.0%) | 27.4% |
| Central African Republic | 56 (5.3%) | 36 (3.4%) | 1 (0.1%) | 1 (0.1%) | 6 (0.5%) | 4 (0.4%) | 0 (0.0%) | 210 (19.8%) | 0 (0.0%) | 27.5% |
| Sri Lanka | 3754 (24.2%) | 1035 (6.7%) | 15 (0.1%) | 23 (0.1%) | 1144 (7.4%) | 197 (1.3%) | 0 (0.0%) | 876 (5.7%) | 314 (2.0%) | 40.4% |
| Chad | 222 (4.0%) | 232 (4.2%) | 13 (0.2%) | 3 (0.1%) | 1 (0.0%) | 33 (0.6%) | 0 (0.0%) | 922 (16.5%) | 0 (0.0%) | 23.8% |
| Chile | 3996 (12.9%) | 1179 (3.8%) | 1118 (3.6%) | 119 (0.4%) | 1 (0.0%) | 258 (0.8%) | 297 (1.0%) | 3041 (9.8%) | 527 (1.7%) | 29.9% |
| China | 1018605 (40.6%) | 199025 (7.9%) | 37941 (1.5%) | 8138 (0.3%) | 3098 (0.1%) | 205653 (8.2%) | 0 (0.0%) | 407589 (16.2%) | 61532 (2.5%) | 59.8% |
| Colombia | 4933 (9.1%) | 1051 (1.9%) | 877 (1.6%) | 203 (0.4%) | 33 (0.1%) | 251 (0.5%) | 312 (0.6%) | 6032 (11.1%) | 709 (1.3%) | 24.1% |
| Comoros | 26 (11.4%) | 1 (0.7%) | 1 (0.4%) | 0 (0.0%) | 4 (1.8%) | 0 (0.0%) | 0 (0.0%) | 26 (11.3%) | 0 (0.0%) | 23.6% |
| Congo, Republic of | 61 (5.2%) | 37 (3.1%) | 2 (0.2%) | 1 (0.1%) | 2 (0.2%) | 4 (0.3%) | 0 (0.0%) | 132 (11.3%) | 0 (0.0%) | 19.3% |
| Congo, Democratic People Republic of | 1154 (5.1%) | 597 (2.6%) | 0 (0.0%) | 18 (0.1%) | 96 (0.4%) | 103 (0.5%) | 0 (0.0%) | 3173 (13.9%) | 44 (0.2%) | 21.3% |
| Costa Rica | 689 (11.6%) | 105 (1.8%) | 112 (1.9%) | 26 (0.4%) | 1 (0.0%) | 25 (0.4%) | 1 (0.0%) | 772 (13.0%) | 38 (0.6%) | 27.0% |
| Croatia | 4239 (28.3%) | 840 (5.6%) | 485 (3.2%) | 65 (0.4%) | 5 (0.0%) | 204 (1.4%) | 506 (3.4%) | 747 (5.0%) | 982 (6.6%) | 44.9% |
| Cuba | 7826 (31.9%) | 947 (3.9%) | 289 (1.2%) | 138 (0.6%) | 146 (0.6%) | 139 (0.6%) | 2 (0.0%) | 1341 (5.5%) | 497 (2.0%) | 41.1% |
| Cyprus | 800 (27.4%) | 98 (3.3%) | 77 (2.6%) | 18 (0.6%) | 2 (0.1%) | 24 (0.8%) | 48 (1.6%) | 135 (4.6%) | 155 (5.3%) | 40.1% |
| Czechia | 7651 (23.6%) | 1778 (5.5%) | 1247 (3.8%) | 120 (0.4%) | 38 (0.1%) | 271 (0.8%) | 1376 (4.2%) | 1238 (3.8%) | 602 (1.9%) | 38.0% |
| Benin | 184 (5.4%) | 84 (2.5%) | 14 (0.4%) | 6 (0.2%) | 8 (0.2%) | 10 (0.3%) | 0 (0.0%) | 643 (18.9%) | 0 (0.0%) | 26.0% |
| Denmark | 5035 (21.9%) | 1141 (5.0%) | 656 (2.8%) | 106 (0.5%) | 8 (0.0%) | 30 (0.1%) | 1361 (5.9%) | 580 (2.5%) | 1223 (5.3%) | 37.7% |
| Dominican Republic | 1395 (13.2%) | 317 (3.0%) | 132 (1.3%) | 47 (0.4%) | 5 (0.0%) | 0 (0.0%) | 0 (0.0%) | 636 (6.0%) | 96 (0.9%) | 22.9% |
| Ecuador | 1243 (9.4%) | 289 (2.2%) | 254 (1.9%) | 32 (0.2%) | 0 (0.0%) | 43 (0.3%) | 84 (0.6%) | 1738 (13.1%) | 92 (0.7%) | 25.9% |
| El Salvador | 261 (6.3%) | 52 (1.3%) | 77 (1.9%) | 15 (0.4%) | 0 (0.0%) | 25 (0.6%) | 1 (0.0%) | 379 (9.2%) | 13 (0.3%) | 18.7% |
| Equatorial Guinea | 26 (6.4%) | 33 (8.2%) | 1 (0.2%) | 1 (0.2%) | 1 (0.2%) | 1 (0.2%) | 0 (0.0%) | 103 (25.6%) | 0 (0.0%) | 36.7% |
| Ethiopia | 1049 (3.9%) | 749 (2.8%) | 0 (0.0%) | 30 (0.1%) | 22 (0.1%) | 121 (0.5%) | 0 (0.0%) | 3507 (13.2%) | 168 (0.6%) | 20.0% |
| Eritrea | 61 (6.9%) | 10 (1.1%) | 0 (0.0%) | 1 (0.1%) | 5 (0.6%) | 4 (0.5%) | 0 (0.0%) | 114 (13.0%) | 0 (0.0%) | 20.8% |
| Estonia | 1045 (25.5%) | 225 (5.5%) | 107 (2.6%) | 11 (0.3%) | 4 (0.1%) | 0 (0.0%) | 98 (2.4%) | 233 (5.7%) | 57 (1.4%) | 38.1% |
| Fiji | 79 (12.1%) | 16 (2.5%) | 14 (2.1%) | 1 (0.2%) | 2 (0.4%) | 0 (0.0%) | 0 (0.0%) | 53 (8.1%) | 4 (0.6%) | 23.8% |
| Finland | 2859 (15.5%) | 777 (4.2%) | 499 (2.7%) | 49 (0.3%) | 18 (0.1%) | 0 (0.0%) | 1076 (5.8%) | 523 (2.8%) | 781 (4.2%) | 31.2% |
| France (metropolitan) | 52322 (22.3%) | 13470 (5.7%) | 6439 (2.7%) | 1007 (0.4%) | 187 (0.1%) | 915 (0.4%) | 6867 (2.9%) | 9361 (4.0%) | 15494 (6.6%) | 38.6% |
| French Guyana | 47 (14.5%) | 11 (3.4%) | 0 (0.0%) | 0 (0.0%) | 0 (0.0%) | 0 (0.0%) | 0 (0.0%) | 25 (7.6%) | 0 (0.0%) | 23.8% |
| French Polynesia | 128 (26.8%) | 7 (1.4%) | 14 (3.0%) | 0 (0.0%) | 1 (0.1%) | 0 (0.0%) | 0 (0.0%) | 34 (7.2%) | 0 (0.0%) | 35.0% |
| Djibouti | 45 (14.9%) | 3 (1.0%) | 2 (0.8%) | 1 (0.3%) | 1 (0.4%) | 1 (0.3%) | 0 (0.0%) | 39 (13.0%) | 0 (0.0%) | 28.2% |
| Gabon | 60 (8.3%) | 75 (10.3%) | 9 (1.2%) | 2 (0.3%) | 1 (0.2%) | 3 (0.4%) | 0 (0.0%) | 147 (20.2%) | 0 (0.0%) | 35.8% |
| Georgia | 2333 (33.4%) | 384 (5.5%) | 175 (2.5%) | 12 (0.2%) | 5 (0.1%) | 171 (2.4%) | 0 (0.0%) | 620 (8.9%) | 208 (3.0%) | 47.1% |
| The Republic of the Gambia | 61 (11.8%) | 34 (6.5%) | 5 (1.0%) | 0 (0.0%) | 0 (0.0%) | 11 (2.1%) | 0 (0.0%) | 167 (32.2%) | 0 (0.0%) | 45.9% |
| Gaza Strip and West Bank | 729 (29.5%) | 24 (1.0%) | 0 (0.0%) | 12 (0.5%) | 1 (0.0%) | 75 (3.0%) | 0 (0.0%) | 192 (7.8%) | 0 (0.0%) | 37.9% |
| Germany | 64852 (23.3%) | 13670 (4.9%) | 9744 (3.5%) | 691 (0.2%) | 329 (0.1%) | 1176 (0.4%) | 10288 (3.7%) | 11699 (4.2%) | 16093 (5.8%) | 39.3% |
| Ghana | 433 (3.9%) | 811 (7.2%) | 46 (0.4%) | 6 (0.1%) | 11 (0.1%) | 80 (0.7%) | 0 (0.0%) | 2805 (25.1%) | 28 (0.2%) | 34.2% |
| Greece | 11792 (33.5%) | 1435 (4.1%) | 1060 (3.0%) | 239 (0.7%) | 2 (0.0%) | 408 (1.2%) | 639 (1.8%) | 1949 (5.5%) | 1276 (3.6%) | 45.7% |
| France, Guadeloupe | 164 (12.9%) | 48 (3.8%) | 0 (0.0%) | 0 (0.0%) | 0 (0.0%) | 0 (0.0%) | 2 (0.2%) | 75 (5.9%) | 0 (0.0%) | 21.3% |
| Guam | 54 (24.6%) | 4 (1.8%) | 0 (0.0%) | 0 (0.0%) | 1 (0.4%) | 0 (0.0%) | 0 (0.0%) | 24 (10.8%) | 0 (0.0%) | 34.3% |
| Guatemala | 539 (7.1%) | 145 (1.9%) | 119 (1.6%) | 16 (0.2%) | 0 (0.0%) | 37 (0.5%) | 0 (0.0%) | 883 (11.7%) | 23 (0.3%) | 21.6% |
| Guinea | 283 (9.3%) | 40 (1.3%) | 11 (0.4%) | 1 (0.0%) | 2 (0.1%) | 35 (1.1%) | 0 (0.0%) | 852 (27.9%) | 3 (0.1%) | 36.6% |
| Guyana | 38 (7.2%) | 13 (2.5%) | 5 (0.8%) | 2 (0.4%) | 1 (0.2%) | 0 (0.0%) | 0 (0.0%) | 26 (4.8%) | 0 (0.0%) | 15.0% |
| Haiti | 321 (4.6%) | 184 (2.6%) | 106 (1.5%) | 14 (0.2%) | 7 (0.1%) | 0 (0.0%) | 0 (0.0%) | 769 (11.0%) | 27 (0.4%) | 19.2% |
| Honduras | 637 (12.8%) | 89 (1.8%) | 67 (1.4%) | 10 (0.2%) | 1 (0.0%) | 32 (0.6%) | 0 (0.0%) | 586 (11.8%) | 42 (0.9%) | 26.8% |
| Hungary | 10089 (31.1%) | 2309 (7.1%) | 1082 (3.3%) | 160 (0.5%) | 2 (0.0%) | 385 (1.2%) | 573 (1.8%) | 1625 (5.0%) | 704 (2.2%) | 44.5% |
| Iceland | 164 (19.4%) | 27 (3.2%) | 28 (3.3%) | 4 (0.5%) | 1 (0.1%) | 0 (0.0%) | 21 (2.5%) | 22 (2.6%) | 36 (4.2%) | 31.7% |
| India | 155081 (22.7%) | 58314 (8.5%) | 88 (0.0%) | 1456 (0.2%) | 64860 (9.5%) | 19207 (2.8%) | 0 (0.0%) | 63863 (9.3%) | 11841 (1.7%) | 44.7% |
| Indonesia | 50156 (27.2%) | 999 (0.5%) | 295 (0.2%) | 430 (0.2%) | 570 (0.3%) | 2465 (1.3%) | 0 (0.0%) | 27175 (14.8%) | 4153 (2.3%) | 40.9% |
| Iran, Islamic Republic of | 15983 (21.7%) | 363 (0.5%) | 1390 (1.9%) | 316 (0.4%) | 96 (0.1%) | 1179 (1.6%) | 0 (0.0%) | 9115 (12.4%) | 537 (0.7%) | 35.0% |
| Iraq | 4011 (25.7%) | 40 (0.3%) | 377 (2.4%) | 75 (0.5%) | 1 (0.0%) | 516 (3.3%) | 0 (0.0%) | 1296 (8.3%) | 325 (2.1%) | 37.5% |
| Ireland | 2607 (18.1%) | 672 (4.7%) | 506 (3.5%) | 60 (0.4%) | 11 (0.1%) | 0 (0.0%) | 757 (5.3%) | 450 (3.1%) | 562 (3.9%) | 33.9% |
| Israel | 3011 (20.6%) | 116 (0.8%) | 438 (3.0%) | 71 (0.5%) | 3 (0.0%) | 181 (1.2%) | 343 (2.3%) | 741 (5.1%) | 393 (2.7%) | 32.2% |
| Italy | 51940 (24.4%) | 7486 (3.5%) | 6449 (3.0%) | 1621 (0.8%) | 66 (0.0%) | 2014 (0.9%) | 6216 (2.9%) | 14796 (6.9%) | 15344 (7.2%) | 41.7% |
| Côte d'Ivoire | 506 (5.2%) | 407 (4.2%) | 53 (0.6%) | 15 (0.2%) | 2 (0.0%) | 57 (0.6%) | 0 (0.0%) | 1384 (14.3%) | 9 (0.1%) | 23.3% |
| Jamaica | 465 (12.7%) | 61 (1.6%) | 44 (1.2%) | 22 (0.6%) | 2 (0.1%) | 14 (0.4%) | 0 (0.0%) | 241 (6.6%) | 41 (1.1%) | 22.4% |
| Japan | 159944 (27.9%) | 26559 (4.6%) | 4735 (0.8%) | 3546 (0.6%) | 94 (0.0%) | 1934 (0.3%) | 0 (0.0%) | 93279 (16.3%) | 30767 (5.4%) | 46.5% |
| Kazakhstan | 5831 (36.0%) | 1013 (6.3%) | 424 (2.6%) | 48 (0.3%) | 285 (1.8%) | 736 (4.5%) | 0 (0.0%) | 1944 (12.0%) | 553 (3.4%) | 53.5% |
| Jordan | 1731 (30.9%) | 22 (0.4%) | 157 (2.8%) | 30 (0.5%) | 1 (0.0%) | 103 (1.8%) | 0 (0.0%) | 463 (8.3%) | 114 (2.0%) | 41.3% |
| Kenya | 1472 (9.2%) | 941 (5.9%) | 16 (0.1%) | 19 (0.1%) | 66 (0.4%) | 9 (0.1%) | 0 (0.0%) | 2170 (13.5%) | 59 (0.4%) | 26.9% |
| Korea, Democratic People Republic of | 11860 (40.5%) | 1363 (4.7%) | 520 (1.8%) | 77 (0.3%) | 0 (0.0%) | 2595 (8.9%) | 0 (0.0%) | 5671 (19.4%) | 825 (2.8%) | 60.4% |
| Korea, Republic of | 38379 (30.4%) | 8039 (6.4%) | 1634 (1.3%) | 807 (0.6%) | 16 (0.0%) | 2758 (2.2%) | 0 (0.0%) | 25609 (20.3%) | 2970 (2.4%) | 51.4% |
| Kuwait | 402 (19.1%) | 0 (0.0%) | 81 (3.8%) | 22 (1.0%) | 1 (0.0%) | 59 (2.8%) | 0 (0.0%) | 190 (9.0%) | 32 (1.5%) | 32.9% |
| Kyrgyzstan | 1133 (34.5%) | 171 (5.2%) | 91 (2.8%) | 3 (0.1%) | 30 (0.9%) | 175 (5.3%) | 0 (0.0%) | 628 (19.1%) | 57 (1.7%) | 55.0% |
| Lao People's Democratic Republic | 1319 (29.1%) | 462 (10.2%) | 17 (0.4%) | 5 (0.1%) | 0 (0.0%) | 67 (1.5%) | 0 (0.0%) | 1054 (23.3%) | 59 (1.3%) | 52.8% |
| Lebanon | 1724 (27.1%) | 46 (0.7%) | 150 (2.4%) | 48 (0.8%) | 5 (0.1%) | 114 (1.8%) | 0 (0.0%) | 314 (4.9%) | 119 (1.9%) | 35.8% |
| Lesotho | 93 (13.3%) | 47 (6.7%) | 2 (0.3%) | 1 (0.1%) | 3 (0.5%) | 2 (0.3%) | 0 (0.0%) | 147 (21.1%) | 12 (1.8%) | 38.0% |
| Latvia | 1541 (26.8%) | 295 (5.1%) | 149 (2.6%) | 11 (0.2%) | 0 (0.0%) | 29 (0.5%) | 61 (1.1%) | 346 (6.0%) | 81 (1.4%) | 38.4% |
| Liberia | 74 (4.9%) | 88 (5.9%) | 13 (0.9%) | 2 (0.1%) | 1 (0.0%) | 12 (0.8%) | 0 (0.0%) | 319 (21.2%) | 0 (0.0%) | 30.7% |
| Libya | 1313 (32.6%) | 1 (0.0%) | 105 (2.6%) | 21 (0.5%) | 2 (0.0%) | 123 (3.1%) | 0 (0.0%) | 365 (9.1%) | 126 (3.1%) | 44.3% |
| Lithuania | 2102 (23.1%) | 577 (6.4%) | 217 (2.4%) | 21 (0.2%) | 6 (0.1%) | 21 (0.2%) | 126 (1.4%) | 544 (6.0%) | 89 (1.0%) | 35.8% |
| Luxembourg | 299 (19.8%) | 61 (4.1%) | 45 (3.0%) | 5 (0.3%) | 0 (0.0%) | 2 (0.1%) | 79 (5.2%) | 46 (3.1%) | 86 (5.7%) | 35.6% |
| Madagascar | 559 (6.8%) | 228 (2.8%) | 0 (0.0%) | 4 (0.0%) | 164 (2.0%) | 10 (0.1%) | 0 (0.0%) | 1090 (13.2%) | 25 (0.3%) | 23.3% |
| Malawi | 546 (7.5%) | 371 (5.1%) | 5 (0.1%) | 1 (0.0%) | 6 (0.1%) | 6 (0.1%) | 0 (0.0%) | 2259 (31.2%) | 1 (0.0%) | 39.8% |
| Malaysia | 6556 (26.7%) | 242 (1.0%) | 419 (1.7%) | 164 (0.7%) | 16 (0.1%) | 421 (1.7%) | 0 (0.0%) | 3415 (13.9%) | 545 (2.2%) | 41.4% |
| Maldives | 65 (26.8%) | 4 (1.6%) | 3 (1.2%) | 1 (0.4%) | 1 (0.4%) | 1 (0.4%) | 0 (0.0%) | 43 (18.0%) | 0 (0.0%) | 42.3% |
| Mali | 408 (7.5%) | 66 (1.2%) | 25 (0.5%) | 11 (0.2%) | 3 (0.1%) | 44 (0.8%) | 0 (0.0%) | 1335 (24.7%) | 4 (0.1%) | 32.3% |
| Malta | 274 (19.0%) | 36 (2.5%) | 45 (3.1%) | 10 (0.7%) | 2 (0.1%) | 6 (0.4%) | 38 (2.6%) | 62 (4.3%) | 79 (5.5%) | 33.4% |
| France, Martinique | 132 (11.6%) | 36 (3.2%) | 0 (0.0%) | 0 (0.0%) | 0 (0.0%) | 0 (0.0%) | 3 (0.3%) | 66 (5.8%) | 0 (0.0%) | 19.6% |
| Mauritania | 101 (8.2%) | 1 (0.1%) | 11 (0.9%) | 4 (0.3%) | 3 (0.2%) | 9 (0.7%) | 0 (0.0%) | 222 (18.1%) | 0 (0.0%) | 26.5% |
| Mauritius | 248 (20.4%) | 36 (2.9%) | 18 (1.4%) | 8 (0.7%) | 23 (1.9%) | 1 (0.1%) | 0 (0.0%) | 103 (8.4%) | 8 (0.6%) | 32.5% |
| Mexico | 8485 (9.3%) | 2258 (2.5%) | 2563 (2.8%) | 318 (0.4%) | 11 (0.0%) | 507 (0.6%) | 30 (0.0%) | 7231 (8.0%) | 1298 (1.4%) | 22.8% |
| Mongolia | 993 (28.5%) | 473 (13.6%) | 195 (5.6%) | 3 (0.1%) | 1 (0.0%) | 127 (3.7%) | 0 (0.0%) | 1557 (44.8%) | 34 (1.0%) | 69.3% |
| Moldova | 2623 (35.8%) | 829 (11.3%) | 215 (2.9%) | 19 (0.3%) | 1 (0.0%) | 48 (0.7%) | 95 (1.3%) | 694 (9.5%) | 45 (0.6%) | 51.4% |
| Montenegro | 462 (36.0%) | 61 (4.8%) | 29 (2.3%) | 4 (0.3%) | 0 (0.0%) | 42 (3.3%) | 31 (2.4%) | 53 (4.1%) | 14 (1.1%) | 46.9% |
| Morocco | 8269 (27.1%) | 146 (0.5%) | 319 (1.0%) | 56 (0.2%) | 43 (0.1%) | 217 (0.7%) | 0 (0.0%) | 2566 (8.4%) | 990 (3.2%) | 37.1% |
| Mozambique | 459 (4.6%) | 193 (1.9%) | 1 (0.0%) | 1 (0.0%) | 10 (0.1%) | 8 (0.1%) | 0 (0.0%) | 3628 (36.7%) | 17 (0.2%) | 41.1% |
| Oman | 261 (10.7%) | 7 (0.3%) | 58 (2.4%) | 14 (0.6%) | 3 (0.1%) | 26 (1.1%) | 0 (0.0%) | 316 (13.0%) | 23 (0.9%) | 26.4% |
| Namibia | 96 (6.8%) | 72 (5.1%) | 4 (0.3%) | 2 (0.1%) | 3 (0.2%) | 1 (0.1%) | 0 (0.0%) | 295 (21.0%) | 14 (1.0%) | 31.4% |
| Nepal | 2025 (20.9%) | 211 (2.2%) | 20 (0.2%) | 10 (0.1%) | 423 (4.4%) | 353 (3.6%) | 0 (0.0%) | 1106 (11.4%) | 213 (2.2%) | 38.4% |
| The Netherlands | 14311 (23.5%) | 2679 (4.4%) | 1833 (3.0%) | 186 (0.3%) | 7 (0.0%) | 248 (0.4%) | 3810 (6.3%) | 1790 (2.9%) | 4449 (7.3%) | 40.6% |
| New Caledonia | 117 (19.0%) | 8 (1.3%) | 0 (0.0%) | 0 (0.0%) | 1 (0.2%) | 0 (0.0%) | 0 (0.0%) | 39 (6.3%) | 0 (0.0%) | 25.2% |
| Vanuatu | 14 (13.5%) | 1 (1.1%) | 3 (2.5%) | 0 (0.0%) | 0 (0.2%) | 0 (0.0%) | 0 (0.0%) | 13 (12.2%) | 1 (0.9%) | 27.5% |
| New Zealand | 2186 (14.8%) | 655 (4.4%) | 472 (3.2%) | 57 (0.4%) | 13 (0.1%) | 0 (0.0%) | 1481 (10.0%) | 448 (3.0%) | 857 (5.8%) | 35.5% |
| Nicaragua | 345 (9.5%) | 85 (2.3%) | 84 (2.3%) | 14 (0.4%) | 0 (0.0%) | 16 (0.4%) | 0 (0.0%) | 427 (11.7%) | 10 (0.3%) | 24.6% |
| Niger | 200 (4.2%) | 19 (0.4%) | 0 (0.0%) | 7 (0.1%) | 7 (0.1%) | 28 (0.6%) | 0 (0.0%) | 976 (20.6%) | 2 (0.0%) | 24.9% |
| Nigeria | 1278 (2.7%) | 2125 (4.6%) | 89 (0.2%) | 77 (0.2%) | 58 (0.1%) | 259 (0.6%) | 0 (0.0%) | 6136 (13.1%) | 85 (0.2%) | 20.3% |
| Norway | 2572 (12.7%) | 639 (3.2%) | 579 (2.9%) | 125 (0.6%) | 0 (0.0%) | 0 (0.0%) | 1547 (7.7%) | 470 (2.3%) | 752 (3.7%) | 29.2% |
| Pakistan | 18422 (21.7%) | 351 (0.4%) | 356 (0.4%) | 172 (0.2%) | 6837 (8.1%) | 2491 (2.9%) | 0 (0.0%) | 7834 (9.2%) | 1052 (1.2%) | 38.1% |
| Panama | 323 (8.0%) | 102 (2.5%) | 67 (1.7%) | 23 (0.6%) | 1 (0.0%) | 9 (0.2%) | 0 (0.0%) | 372 (9.2%) | 26 (0.7%) | 21.1% |
| Papua New Guinea | 820 (16.3%) | 130 (2.6%) | 65 (1.3%) | 5 (0.1%) | 600 (11.9%) | 0 (0.0%) | 0 (0.0%) | 663 (13.2%) | 38 (0.8%) | 39.1% |
| Paraguay | 1279 (19.1%) | 306 (4.6%) | 126 (1.9%) | 37 (0.6%) | 8 (0.1%) | 33 (0.5%) | 74 (1.1%) | 508 (7.6%) | 89 (1.3%) | 32.4% |
| Peru | 1450 (4.5%) | 747 (2.3%) | 588 (1.8%) | 98 (0.3%) | 10 (0.0%) | 228 (0.7%) | 349 (1.1%) | 4221 (13.2%) | 261 (0.8%) | 22.8% |
| Philippines | 23952 (29.1%) | 4494 (5.5%) | 340 (0.4%) | 358 (0.4%) | 142 (0.2%) | 1803 (2.2%) | 0 (0.0%) | 8999 (10.9%) | 2032 (2.5%) | 43.6% |
| Poland | 32233 (30.4%) | 6327 (6.0%) | 2668 (2.5%) | 512 (0.5%) | 53 (0.1%) | 2253 (2.1%) | 1436 (1.4%) | 6081 (5.7%) | 4410 (4.2%) | 44.6% |
| Portugal | 8049 (22.3%) | 2779 (7.7%) | 995 (2.8%) | 351 (1.0%) | 0 (0.0%) | 0 (0.0%) | 402 (1.1%) | 2783 (7.7%) | 820 (2.3%) | 38.4% |
| Guinea-Bissau | 16 (3.9%) | 23 (5.5%) | 2 (0.5%) | 0 (0.0%) | 0 (0.0%) | 3 (0.7%) | 0 (0.0%) | 95 (23.0%) | 0 (0.0%) | 30.9% |
| Timor-Leste | 99 (27.0%) | 1 (0.2%) | 0 (0.0%) | 1 (0.3%) | 3 (0.7%) | 6 (1.6%) | 0 (0.0%) | 65 (17.5%) | 5 (1.4%) | 42.2% |
| Puerto Rico | 839 (11.7%) | 315 (4.4%) | 205 (2.9%) | 50 (0.7%) | 7 (0.1%) | 0 (0.0%) | 4 (0.1%) | 311 (4.3%) | 0 (0.0%) | 22.2% |
| Qatar | 150 (13.8%) | 7 (0.6%) | 33 (3.1%) | 7 (0.6%) | 2 (0.2%) | 29 (2.7%) | 0 (0.0%) | 104 (9.6%) | 13 (1.2%) | 28.4% |
| France, La Réunion | 256 (14.4%) | 75 (4.2%) | 0 (0.0%) | 0 (0.0%) | 35 (2.0%) | 0 (0.0%) | 0 (0.0%) | 150 (8.5%) | 0 (0.0%) | 26.5% |
| Romania | 16497 (30.1%) | 4905 (8.9%) | 1591 (2.9%) | 254 (0.5%) | 17 (0.0%) | 495 (0.9%) | 899 (1.6%) | 4592 (8.4%) | 917 (1.7%) | 46.0% |
| Russian Federation | 103889 (35.5%) | 22228 (7.6%) | 7985 (2.7%) | 751 (0.3%) | 118 (0.0%) | 107 (0.0%) | 4048 (1.4%) | 23664 (8.1%) | 6952 (2.4%) | 48.9% |
| Rwanda | 313 (9.7%) | 222 (6.9%) | 0 (0.0%) | 2 (0.1%) | 1 (0.0%) | 32 (1.0%) | 0 (0.0%) | 658 (20.4%) | 8 (0.2%) | 33.9% |
| Saint Lucia | 29 (11.0%) | 10 (3.6%) | 5 (2.0%) | 1 (0.4%) | 0 (0.2%) | 0 (0.0%) | 0 (0.0%) | 22 (8.2%) | 0 (0.0%) | 23.2% |
| Sao Tome and Principe | 7 (9.9%) | 4 (5.3%) | 1 (0.9%) | 0 (0.0%) | 0 (0.0%) | 2 (2.6%) | 0 (0.0%) | 16 (20.5%) | 0 (0.0%) | 34.5% |
| Saudi Arabia | 2243 (15.4%) | 13 (0.1%) | 553 (3.8%) | 138 (0.9%) | 14 (0.1%) | 321 (2.2%) | 0 (0.0%) | 1804 (12.4%) | 102 (0.7%) | 31.6% |
| Senegal | 319 (7.7%) | 32 (0.8%) | 8 (0.2%) | 4 (0.1%) | 1 (0.0%) | 39 (0.9%) | 0 (0.0%) | 845 (20.4%) | 6 (0.2%) | 28.1% |
| Serbia | 7428 (33.7%) | 1224 (5.5%) | 468 (2.1%) | 141 (0.6%) | 4 (0.0%) | 667 (3.0%) | 408 (1.8%) | 1084 (4.9%) | 561 (2.5%) | 46.3% |
| Sierra Leone | 52 (6.0%) | 56 (6.4%) | 1 (0.1%) | 0 (0.0%) | 0 (0.0%) | 12 (1.4%) | 0 (0.0%) | 240 (27.5%) | 0 (0.0%) | 37.1% |
| Singapore | 2661 (20.4%) | 169 (1.3%) | 230 (1.8%) | 71 (0.5%) | 6 (0.0%) | 87 (0.7%) | 0 (0.0%) | 1483 (11.3%) | 468 (3.6%) | 34.8% |
| Slovakia | 3979 (24.9%) | 1158 (7.3%) | 504 (3.2%) | 70 (0.4%) | 26 (0.2%) | 156 (1.0%) | 542 (3.4%) | 820 (5.1%) | 206 (1.3%) | 40.0% |
| Viet Nam | 30846 (32.6%) | 7298 (7.7%) | 0 (0.0%) | 193 (0.2%) | 24 (0.0%) | 1628 (1.7%) | 0 (0.0%) | 26678 (28.2%) | 2618 (2.8%) | 57.4% |
| Slovenia | 1734 (23.2%) | 380 (5.1%) | 178 (2.4%) | 21 (0.3%) | 4 (0.0%) | 76 (1.0%) | 330 (4.4%) | 372 (5.0%) | 350 (4.7%) | 39.3% |
| Somalia | 322 (8.3%) | 21 (0.5%) | 8 (0.2%) | 7 (0.2%) | 11 (0.3%) | 6 (0.2%) | 0 (0.0%) | 535 (13.8%) | 6 (0.2%) | 22.2% |
| South Africa | 7708 (16.6%) | 2753 (5.9%) | 544 (1.2%) | 179 (0.4%) | 33 (0.1%) | 436 (0.9%) | 0 (0.0%) | 5242 (11.3%) | 1786 (3.8%) | 34.8% |
| Zimbabwe | 728 (11.5%) | 227 (3.6%) | 8 (0.1%) | 6 (0.1%) | 5 (0.1%) | 7 (0.1%) | 0 (0.0%) | 1331 (21.0%) | 16 (0.2%) | 33.0% |
| Spain | 42647 (28.5%) | 7857 (5.2%) | 4813 (3.2%) | 934 (0.6%) | 149 (0.1%) | 340 (0.2%) | 2247 (1.5%) | 7432 (5.0%) | 6388 (4.3%) | 41.8% |
| South Sudan | 217 (7.8%) | 148 (5.3%) | 0 (0.0%) | 3 (0.1%) | 18 (0.7%) | 7 (0.3%) | 0 (0.0%) | 499 (17.9%) | 0 (0.0%) | 29.0% |
| Sudan | 1869 (16.9%) | 69 (0.6%) | 92 (0.8%) | 17 (0.2%) | 103 (0.9%) | 42 (0.4%) | 0 (0.0%) | 1389 (12.5%) | 54 (0.5%) | 29.7% |
| Suriname | 95 (16.8%) | 14 (2.6%) | 8 (1.4%) | 4 (0.7%) | 1 (0.1%) | 1 (0.2%) | 0 (0.0%) | 35 (6.2%) | 1 (0.3%) | 26.0% |
| Eswatini | 12 (3.7%) | 11 (3.4%) | 2 (0.7%) | 0 (0.0%) | 1 (0.2%) | 1 (0.3%) | 0 (0.0%) | 97 (29.3%) | 2 (0.7%) | 35.5% |
| Sweden | 4225 (12.6%) | 1100 (3.3%) | 861 (2.6%) | 89 (0.3%) | 0 (0.0%) | 0 (0.0%) | 2535 (7.5%) | 805 (2.4%) | 951 (2.8%) | 27.9% |
| Switzerland | 5497 (21.0%) | 1189 (4.5%) | 743 (2.8%) | 84 (0.3%) | 65 (0.2%) | 42 (0.2%) | 1180 (4.5%) | 1076 (4.1%) | 1451 (5.5%) | 37.1% |
| Syrian Arab Republic | 2875 (29.1%) | 21 (0.2%) | 234 (2.4%) | 34 (0.3%) | 0 (0.0%) | 236 (2.4%) | 0 (0.0%) | 691 (7.0%) | 242 (2.4%) | 39.0% |
| Tajikistan | 454 (15.7%) | 45 (1.6%) | 61 (2.1%) | 5 (0.2%) | 32 (1.1%) | 90 (3.1%) | 0 (0.0%) | 590 (20.5%) | 14 (0.5%) | 38.6% |
| Thailand | 26383 (29.8%) | 7225 (8.2%) | 950 (1.1%) | 260 (0.3%) | 171 (0.2%) | 1918 (2.2%) | 0 (0.0%) | 12634 (14.3%) | 2119 (2.4%) | 48.0% |
| Togo | 190 (8.3%) | 48 (2.1%) | 5 (0.2%) | 4 (0.2%) | 6 (0.3%) | 12 (0.5%) | 0 (0.0%) | 356 (15.6%) | 0 (0.0%) | 25.1% |
| Trinidad and Tobago | 272 (13.8%) | 53 (2.7%) | 37 (1.9%) | 10 (0.5%) | 0 (0.0%) | 0 (0.0%) | 0 (0.0%) | 87 (4.5%) | 22 (1.1%) | 22.7% |
| United Arab Emirates | 389 (15.2%) | 32 (1.3%) | 69 (2.7%) | 25 (1.0%) | 3 (0.1%) | 47 (1.8%) | 0 (0.0%) | 200 (7.8%) | 25 (1.0%) | 27.9% |
| Tunisia | 4219 (37.8%) | 75 (0.7%) | 144 (1.3%) | 27 (0.2%) | 16 (0.1%) | 341 (3.1%) | 0 (0.0%) | 1028 (9.2%) | 336 (3.0%) | 48.1% |
| Türkiye | 46899 (36.9%) | 1170 (0.9%) | 3078 (2.4%) | 495 (0.4%) | 22 (0.0%) | 3439 (2.7%) | 0 (0.0%) | 9924 (7.8%) | 9272 (7.3%) | 49.4% |
| Turkmenistan | 770 (26.2%) | 181 (6.2%) | 83 (2.8%) | 2 (0.1%) | 40 (1.4%) | 74 (2.5%) | 0 (0.0%) | 433 (14.7%) | 26 (0.9%) | 45.3% |
| Uganda | 818 (5.4%) | 1498 (9.8%) | 0 (0.0%) | 6 (0.0%) | 45 (0.3%) | 51 (0.3%) | 0 (0.0%) | 4601 (30.1%) | 30 (0.2%) | 40.9% |
| Ukraine | 27217 (36.8%) | 6513 (8.8%) | 1966 (2.7%) | 139 (0.2%) | 26 (0.0%) | 645 (0.9%) | 1118 (1.5%) | 5783 (7.8%) | 1679 (2.3%) | 50.8% |
| North Macedonia | 1349 (33.6%) | 125 (3.1%) | 91 (2.3%) | 11 (0.3%) | 0 (0.0%) | 162 (4.0%) | 99 (2.5%) | 292 (7.3%) | 36 (0.9%) | 46.1% |
| Egypt | 19790 (27.3%) | 463 (0.6%) | 4095 (5.6%) | 113 (0.2%) | 11 (0.0%) | 1976 (2.7%) | 0 (0.0%) | 20263 (27.9%) | 1083 (1.5%) | 53.0% |
| United Kingdom | 45343 (20.8%) | 10116 (4.7%) | 7386 (3.4%) | 906 (0.4%) | 165 (0.1%) | 471 (0.2%) | 9237 (4.2%) | 6586 (3.0%) | 1032 (0.5%) | 33.1% |
| Tanzania, United Republic of | 2031 (11.4%) | 1680 (9.4%) | 26 (0.1%) | 8 (0.0%) | 36 (0.2%) | 19 (0.1%) | 0 (0.0%) | 2689 (15.0%) | 37 (0.2%) | 32.2% |
| United States of America | 190821 (20.5%) | 35667 (3.8%) | 36719 (3.9%) | 3188 (0.3%) | 2238 (0.2%) | 0 (0.0%) | 56898 (6.1%) | 45862 (4.9%) | 36865 (4.0%) | 37.4% |
| Burkina Faso | 308 (5.6%) | 405 (7.4%) | 7 (0.1%) | 2 (0.0%) | 16 (0.3%) | 23 (0.4%) | 0 (0.0%) | 1056 (19.2%) | 4 (0.1%) | 30.0% |
| Uruguay | 1920 (24.3%) | 373 (4.7%) | 276 (3.5%) | 42 (0.5%) | 0 (0.0%) | 0 (0.0%) | 83 (1.0%) | 443 (5.6%) | 213 (2.7%) | 37.0% |
| Uzbekistan | 3319 (21.0%) | 540 (3.4%) | 391 (2.5%) | 21 (0.1%) | 596 (3.8%) | 595 (3.8%) | 0 (0.0%) | 2210 (14.0%) | 153 (1.0%) | 41.4% |
| Venezuela | 4012 (13.9%) | 1143 (4.0%) | 660 (2.3%) | 174 (0.6%) | 61 (0.2%) | 260 (0.9%) | 36 (0.1%) | 2497 (8.7%) | 310 (1.1%) | 28.3% |
| Samoa | 56 (29.5%) | 4 (2.0%) | 9 (4.7%) | 1 (0.5%) | 0 (0.1%) | 0 (0.0%) | 0 (0.0%) | 13 (7.0%) | 0 (0.0%) | 39.2% |
| Yemen | 1424 (20.2%) | 24 (0.3%) | 58 (0.8%) | 20 (0.3%) | 47 (0.7%) | 108 (1.5%) | 0 (0.0%) | 1113 (15.8%) | 65 (0.9%) | 35.8% |
| Zambia | 314 (5.0%) | 223 (3.5%) | 0 (0.0%) | 3 (0.0%) | 6 (0.1%) | 8 (0.1%) | 0 (0.0%) | 2027 (32.2%) | 4 (0.1%) | 38.1% |

## Tobacco Smoking

**Table 5.2.1**. Proportion and number of cancers attributable to smoking, women and men

| **Country** | **Women** | | | **Men** | | |
| --- | --- | --- | --- | --- | --- | --- |
| **N** | **PAF smoking** | **PAF all** | **N** | **PAF smoking** | **PAF all** |
| Afghanistan | 187 | 3.3% | 0.1% | 1556 | 23.2% | 0.9% |
| Albania | 243 | 14.8% | 0.4% | 1882 | 57.5% | 2.7% |
| Algeria | 333 | 2.9% | 0.1% | 7690 | 43.0% | 1.7% |
| Angola | 290 | 4.7% | 0.1% | 894 | 21.7% | 0.5% |
| Argentina | 7340 | 25.2% | 0.6% | 13382 | 37.0% | 1.3% |
| Armenia | 77 | 3.6% | 0.1% | 1868 | 55.5% | 2.3% |
| Australia | 6022 | 22.8% | 0.5% | 9824 | 26.4% | 0.8% |
| Austria | 2834 | 30.8% | 0.7% | 5421 | 42.1% | 1.4% |
| Azerbaijan | 76 | 1.7% | 0.0% | 3604 | 51.9% | 2.3% |
| Bahamas | 12 | 7.1% | 0.1% | 40 | 22.5% | 0.5% |
| Bahrain | 15 | 6.7% | 0.1% | 128 | 33.0% | 1.2% |
| Bangladesh | 1437 | 3.5% | 0.1% | 32955 | 46.6% | 2.2% |
| Barbados | 8 | 4.0% | 0.1% | 53 | 21.8% | 0.6% |
| Belarus | 749 | 8.5% | 0.2% | 8352 | 51.6% | 2.1% |
| Belgium | 4098 | 29.7% | 0.7% | 9037 | 43.6% | 1.5% |
| Belize | 6 | 6.9% | 0.2% | 26 | 33.6% | 1.0% |
| Benin | 42 | 2.3% | 0.1% | 184 | 10.9% | 0.3% |
| Bhutan | 13 | 6.5% | 0.3% | 53 | 20.4% | 0.9% |
| Bolivia | 261 | 5.3% | 0.2% | 748 | 22.2% | 0.6% |
| Bosnia Herzegovina | 886 | 28.2% | 0.8% | 2942 | 55.2% | 2.4% |
| Botswana | 63 | 9.5% | 0.3% | 137 | 37.9% | 1.0% |
| Brazil | 24061 | 20.4% | 0.5% | 46483 | 32.8% | 1.0% |
| Brunei Darussalam | 36 | 12.7% | 0.4% | 89 | 32.4% | 1.5% |
| Bulgaria | 1655 | 22.2% | 0.6% | 5343 | 48.0% | 2.0% |
| Burkina Faso | 44 | 0.9% | 0.0% | 308 | 10.1% | 0.4% |
| Burundi | 93 | 3.5% | 0.1% | 235 | 17.0% | 0.4% |
| Cambodia | 451 | 7.7% | 0.2% | 2798 | 41.0% | 1.9% |
| Cameroon | 73 | 1.5% | 0.0% | 482 | 15.5% | 0.4% |
| Canada | 16240 | 32.7% | 0.8% | 25232 | 37.5% | 1.3% |
| Cape Verde | 4 | 4.1% | 0.1% | 15 | 15.8% | 0.5% |
| Central African Republic | 16 | 2.3% | 0.1% | 56 | 12.5% | 0.3% |
| Chad | 55 | 2.0% | 0.1% | 222 | 11.1% | 0.2% |
| Chile | 2588 | 19.1% | 0.6% | 3996 | 25.7% | 0.8% |
| China | 141748 | 11.3% | 0.3% | 1018605 | 51.2% | 2.5% |
| Colombia | 2559 | 9.8% | 0.2% | 4933 | 19.8% | 0.6% |
| Comoros | 8 | 3.3% | 0.1% | 26 | 24.8% | 0.7% |
| Congo, Democratic Republic of | 348 | 2.2% | 0.1% | 1154 | 12.8% | 0.3% |
| Congo, Republic of | 18 | 2.2% | 0.1% | 61 | 12.5% | 0.3% |
| Costa Rica | 205 | 8.4% | 0.2% | 689 | 24.6% | 0.7% |
| Croatia | 1599 | 27.7% | 0.7% | 4239 | 47.1% | 1.8% |
| Cuba | 2938 | 27.4% | 0.8% | 7826 | 52.9% | 2.0% |
| Cyprus | 213 | 21.0% | 0.4% | 800 | 49.4% | 1.7% |
| Czechia | 3440 | 27.0% | 0.7% | 7651 | 42.4% | 1.5% |
| C�te d'Ivoire | 214 | 4.6% | 0.1% | 506 | 16.9% | 0.3% |
| Denmark | 3551 | 36.8% | 0.9% | 5035 | 40.4% | 1.4% |
| Djibouti | 10 | 4.7% | 0.1% | 45 | 27.7% | 0.9% |
| Dominican Republic | 992 | 22.0% | 0.6% | 1395 | 32.3% | 0.8% |
| Ecuador | 474 | 6.2% | 0.2% | 1243 | 19.9% | 0.6% |
| Egypt | 430 | 1.4% | 0.0% | 19790 | 40.6% | 1.7% |
| El Salvador | 146 | 5.5% | 0.1% | 261 | 15.1% | 0.4% |
| Equatorial Guinea | 5 | 2.0% | 0.0% | 26 | 14.1% | 0.4% |
| Eritrea | 4 | 0.5% | 0.0% | 61 | 13.7% | 0.4% |
| Estonia | 349 | 18.6% | 0.5% | 1045 | 45.2% | 1.6% |
| Eswatini | 24 | 4.7% | 0.2% | 12 | 14.7% | 0.2% |
| Ethiopia | 206 | 0.9% | 0.0% | 1049 | 7.1% | 0.2% |
| Fiji | 38 | 9.4% | 0.2% | 79 | 27.8% | 0.8% |
| Finland | 1379 | 21.4% | 0.5% | 2859 | 33.6% | 1.0% |
| France (metropolitan) | 20460 | 24.4% | 0.6% | 52322 | 40.1% | 1.4% |
| France, Guadeloupe | 52 | 15.0% | 0.4% | 164 | 35.6% | 0.8% |
| France, La R�union | 25 | 4.3% | 0.1% | 256 | 24.6% | 0.9% |
| France, Martinique | 54 | 15.3% | 0.4% | 132 | 32.5% | 0.7% |
| French Guyana | 15 | 17.0% | 0.4% | 47 | 31.1% | 0.9% |
| French Polynesia | 28 | 20.6% | 0.4% | 128 | 46.8% | 1.7% |
| Gabon | 15 | 2.6% | 0.1% | 60 | 16.2% | 0.5% |
| Gaza Strip and West Bank | 37 | 4.2% | 0.1% | 729 | 46.9% | 1.8% |
| Georgia | 144 | 5.6% | 0.1% | 2333 | 52.8% | 2.1% |
| Germany | 31187 | 27.5% | 0.7% | 64852 | 41.6% | 1.5% |
| Ghana | 169 | 2.2% | 0.1% | 433 | 7.8% | 0.2% |
| Greece | 3469 | 28.2% | 0.7% | 11792 | 52.7% | 2.1% |
| Guam | 19 | 19.2% | 0.5% | 54 | 36.0% | 1.5% |
| Guatemala | 256 | 4.3% | 0.1% | 539 | 15.0% | 0.4% |
| Guinea | 99 | 2.5% | 0.1% | 283 | 17.5% | 0.6% |
| Guinea-Bissau | 6 | 1.5% | 0.0% | 16 | 8.4% | 0.2% |
| Guyana | 18 | 6.8% | 0.1% | 38 | 22.8% | 0.4% |
| Haiti | 163 | 4.3% | 0.1% | 321 | 11.6% | 0.3% |
| Honduras | 183 | 6.8% | 0.2% | 637 | 26.1% | 0.8% |
| Hungary | 5052 | 32.1% | 0.9% | 10089 | 47.0% | 1.9% |
| Iceland | 109 | 29.5% | 0.7% | 164 | 36.4% | 1.2% |
| India | 17940 | 4.8% | 0.1% | 155081 | 32.8% | 1.4% |
| Indonesia | 4511 | 4.5% | 0.1% | 50156 | 42.6% | 1.7% |
| Iran, Islamic Republic of | 1740 | 5.9% | 0.2% | 15983 | 33.9% | 1.4% |
| Iraq | 413 | 6.5% | 0.1% | 4011 | 44.6% | 1.6% |
| Ireland | 1771 | 33.0% | 0.8% | 2607 | 37.2% | 1.1% |
| Israel | 1292 | 21.7% | 0.5% | 3011 | 38.0% | 1.3% |
| Italy | 19884 | 22.7% | 0.6% | 51940 | 38.8% | 1.5% |
| Jamaica | 161 | 11.4% | 0.2% | 465 | 31.3% | 0.8% |
| Japan | 32520 | 13.6% | 0.4% | 159944 | 40.4% | 1.7% |
| Jordan | 197 | 9.2% | 0.2% | 1731 | 49.2% | 1.9% |
| Kazakhstan | 509 | 5.7% | 0.2% | 5831 | 48.3% | 2.2% |
| Kenya | 466 | 3.1% | 0.1% | 1472 | 18.1% | 0.6% |
| Korea, Democratic People Republic of | 2099 | 10.1% | 0.4% | 11860 | 47.2% | 2.5% |
| Korea, Republic of | 5418 | 10.6% | 0.3% | 38379 | 42.4% | 1.9% |
| Kuwait | 30 | 4.6% | 0.1% | 402 | 35.3% | 1.2% |
| Kyrgyzstan | 126 | 6.2% | 0.2% | 1133 | 45.1% | 2.2% |
| Lao People's Democratic Republic | 147 | 6.3% | 0.2% | 1319 | 37.9% | 1.8% |
| Latvia | 325 | 13.0% | 0.3% | 1541 | 47.6% | 1.7% |
| Lebanon | 704 | 32.0% | 0.6% | 1724 | 51.5% | 1.7% |
| Lesotho | 59 | 7.1% | 0.3% | 93 | 37.0% | 0.8% |
| Liberia | 31 | 2.5% | 0.1% | 74 | 11.1% | 0.3% |
| Libya | 21 | 1.1% | 0.0% | 1313 | 48.1% | 2.0% |
| Lithuania | 359 | 11.2% | 0.3% | 2102 | 44.8% | 1.4% |
| Luxembourg | 166 | 28.5% | 0.6% | 299 | 40.7% | 1.2% |
| Madagascar | 162 | 2.3% | 0.1% | 559 | 14.8% | 0.4% |
| Malawi | 253 | 3.5% | 0.1% | 546 | 21.3% | 0.5% |
| Malaysia | 415 | 3.3% | 0.1% | 6556 | 37.9% | 1.7% |
| Maldives | 7 | 6.5% | 0.2% | 65 | 37.4% | 1.7% |
| Mali | 126 | 2.3% | 0.1% | 408 | 13.3% | 0.5% |
| Malta | 87 | 19.0% | 0.4% | 274 | 38.5% | 1.2% |
| Mauritania | 37 | 3.8% | 0.1% | 101 | 17.1% | 0.5% |
| Mauritius | 29 | 4.4% | 0.1% | 248 | 34.6% | 1.3% |
| Mexico | 2909 | 6.3% | 0.2% | 8485 | 21.1% | 0.6% |
| Moldova | 183 | 6.5% | 0.2% | 2623 | 50.0% | 2.2% |
| Mongolia | 145 | 5.5% | 0.3% | 993 | 31.6% | 1.8% |
| Montenegro | 178 | 37.1% | 0.8% | 462 | 58.1% | 2.3% |
| Morocco | 224 | 1.9% | 0.0% | 8269 | 43.5% | 1.7% |
| Mozambique | 370 | 4.1% | 0.1% | 459 | 15.0% | 0.3% |
| Myanmar | 3518 | 14.0% | 0.5% | 10133 | 37.3% | 1.8% |
| Namibia | 85 | 12.2% | 0.3% | 96 | 21.2% | 0.4% |
| Nepal | 1050 | 16.7% | 0.5% | 2025 | 33.5% | 1.3% |
| New Caledonia | 35 | 17.8% | 0.4% | 117 | 34.1% | 1.2% |
| New Zealand | 1223 | 23.9% | 0.5% | 2186 | 31.4% | 0.9% |
| Nicaragua | 107 | 4.6% | 0.1% | 345 | 18.9% | 0.6% |
| Niger | 20 | 0.8% | 0.0% | 200 | 7.5% | 0.3% |
| Nigeria | 501 | 1.7% | 0.0% | 1278 | 8.6% | 0.2% |
| North Macedonia | 399 | 28.9% | 0.7% | 1349 | 54.2% | 2.1% |
| Norway | 1662 | 21.1% | 0.5% | 2572 | 27.6% | 0.8% |
| Oman | 11 | 2.2% | 0.0% | 261 | 19.1% | 0.7% |
| Pakistan | 1897 | 5.0% | 0.1% | 18422 | 34.7% | 1.4% |
| Panama | 109 | 6.1% | 0.1% | 323 | 19.2% | 0.5% |
| Papua New Guinea | 435 | 14.2% | 0.4% | 820 | 28.1% | 1.0% |
| Paraguay | 416 | 14.3% | 0.3% | 1279 | 39.4% | 1.2% |
| Peru | 519 | 2.9% | 0.1% | 1450 | 10.6% | 0.3% |
| Philippines | 5491 | 11.7% | 0.3% | 23952 | 43.3% | 1.8% |
| Poland | 14621 | 30.4% | 0.8% | 32233 | 47.2% | 1.9% |
| Portugal | 1467 | 10.8% | 0.3% | 8049 | 35.5% | 1.4% |
| Puerto Rico | 285 | 11.9% | 0.3% | 839 | 26.4% | 0.7% |
| Qatar | 4 | 1.8% | 0.0% | 150 | 27.6% | 0.9% |
| Romania | 3957 | 18.1% | 0.5% | 16497 | 45.3% | 1.9% |
| Russian Federation | 16108 | 10.3% | 0.3% | 103889 | 51.9% | 2.2% |
| Rwanda | 224 | 10.5% | 0.3% | 313 | 21.4% | 0.6% |
| Saint Lucia | 6 | 8.2% | 0.2% | 29 | 29.8% | 0.7% |
| Samoa | 15 | 18.6% | 0.4% | 56 | 48.2% | 1.8% |
| Sao Tome and Principe | 1 | 3.1% | 0.1% | 7 | 16.3% | 0.6% |
| Saudi Arabia | 116 | 2.6% | 0.0% | 2243 | 25.9% | 1.0% |
| Senegal | 50 | 1.2% | 0.0% | 319 | 15.1% | 0.5% |
| Serbia | 3001 | 33.1% | 0.9% | 7428 | 50.7% | 2.1% |
| Sierra Leone | 36 | 4.6% | 0.2% | 52 | 13.1% | 0.4% |
| Singapore | 532 | 9.7% | 0.3% | 2661 | 30.1% | 1.3% |
| Slovakia | 1007 | 16.9% | 0.4% | 3979 | 41.7% | 1.6% |
| Slovenia | 788 | 28.9% | 0.7% | 1734 | 41.4% | 1.5% |
| Solomon Islands | 20 | 12.8% | 0.3% | 40 | 32.7% | 0.9% |
| Somalia | 95 | 3.0% | 0.1% | 322 | 16.4% | 0.5% |
| South Africa | 3516 | 13.2% | 0.4% | 7708 | 35.6% | 1.0% |
| South Sudan | 59 | 3.1% | 0.1% | 217 | 17.2% | 0.5% |
| Spain | 11337 | 22.3% | 0.5% | 42647 | 45.4% | 1.8% |
| Sri Lanka | 249 | 3.3% | 0.1% | 3754 | 37.9% | 1.5% |
| Sudan | 127 | 2.0% | 0.0% | 1869 | 34.7% | 1.1% |
| Suriname | 36 | 12.8% | 0.4% | 95 | 37.3% | 1.1% |
| Sweden | 3634 | 30.3% | 0.7% | 4225 | 29.5% | 0.8% |
| Switzerland | 2843 | 30.1% | 0.7% | 5497 | 40.4% | 1.3% |
| Syrian Arab Republic | 300 | 7.2% | 0.1% | 2875 | 48.0% | 1.8% |
| Tajikistan | 43 | 2.8% | 0.1% | 454 | 26.5% | 1.0% |
| Tanzania, United Republic of | 1982 | 11.9% | 0.4% | 2031 | 25.2% | 0.7% |
| Thailand | 3260 | 6.4% | 0.2% | 26383 | 40.1% | 1.9% |
| The Netherlands | 9171 | 35.4% | 0.9% | 14311 | 40.6% | 1.5% |
| The Republic of the Gambia | 6 | 1.2% | 0.0% | 61 | 16.8% | 0.7% |
| Timor-Leste | 10 | 4.0% | 0.1% | 99 | 38.3% | 1.7% |
| Togo | 56 | 4.5% | 0.1% | 190 | 18.8% | 0.5% |
| Trinidad and Tobago | 68 | 8.3% | 0.2% | 272 | 32.5% | 0.9% |
| Tunisia | 154 | 4.2% | 0.1% | 4219 | 56.3% | 2.4% |
| Turkmenistan | 93 | 5.3% | 0.1% | 770 | 37.8% | 1.6% |
| T�rkiye | 6458 | 14.9% | 0.3% | 46899 | 54.4% | 2.3% |
| Uganda | 535 | 4.5% | 0.1% | 818 | 13.7% | 0.3% |
| Ukraine | 2891 | 8.0% | 0.2% | 27217 | 51.3% | 2.3% |
| United Arab Emirates | 47 | 5.3% | 0.1% | 389 | 28.4% | 1.0% |
| United Kingdom | 31659 | 35.3% | 0.9% | 45343 | 39.5% | 1.3% |
| United States of America | 128236 | 35.6% | 0.8% | 190821 | 39.9% | 1.3% |
| Uruguay | 743 | 20.2% | 0.5% | 1920 | 40.1% | 1.5% |
| Uzbekistan | 272 | 2.7% | 0.1% | 3319 | 31.7% | 1.3% |
| Vanuatu | 2 | 3.5% | 0.1% | 14 | 25.8% | 0.8% |
| Venezuela | 1863 | 12.5% | 0.3% | 4012 | 26.7% | 0.9% |
| Viet Nam | 1680 | 4.1% | 0.1% | 30846 | 40.9% | 2.0% |
| Yemen | 388 | 9.5% | 0.2% | 1424 | 32.5% | 1.3% |
| Zambia | 303 | 6.0% | 0.2% | 314 | 18.2% | 0.3% |
| Zimbabwe | 442 | 7.2% | 0.2% | 728 | 32.3% | 0.7% |

**Table 5.2.2.** Proportion and number of cancer cases attributable to smoking by cancer site in women

| **Country** | **Lip, oral cavity** | **Salivary glands** | **Oropharynx** | **Nasopharynx** | **Hypopharynx** | **Oesophagus** | **Stomach** | **Colon** | **Rectum** | **Liver and intrahepatic bile ducts** | **Pancreas** | **Larynx** | **Trachea, bronchus and lung** | **Cervix uteri** | **Ovary** | **Kidney** | **Bladder** | **Leukaemia** |
| --- | --- | --- | --- | --- | --- | --- | --- | --- | --- | --- | --- | --- | --- | --- | --- | --- | --- | --- |
| **N (PAF)** | **N (PAF)** | **N (PAF)** | **N (PAF)** | **N (PAF)** | **N (PAF)** | **N (PAF)** | **N (PAF)** | **N (PAF)** | **N (PAF)** | **N (PAF)** | **N (PAF)** | **N (PAF)** | **N (PAF)** | **N (PAF)** | **N (PAF)** | **N (PAF)** | **N (PAF)** |
| Afghanistan | 13 (4.2%) | 1 (3.2%) | 3 (6.8%) | 1 (1.4%) | 3 (6.7%) | 18 (4.5%) | 12 (1.5%) | 4 (1.4%) | 3 (1.3%) | 6 (1.7%) | 5 (3.5%) | 5 (11.0%) | 38 (10.1%) | 63 (5.2%) | 0 (0.0%) | 2 (1.1%) | 4 (4.5%) | 5 (1.1%) |
| Albania | 5 (16.6%) | 1 (18.7%) | 2 (27.6%) | 1 (9.9%) | 2 (26.7%) | 4 (17.3%) | 15 (6.2%) | 5 (4.8%) | 4 (4.7%) | 4 (6.1%) | 15 (13.9%) | 10 (42.4%) | 118 (38.7%) | 29 (17.0%) | 1 (0.5%) | 3 (5.2%) | 12 (17.0%) | 10 (9.3%) |
| Algeria | 5 (4.3%) | 1 (2.7%) | 1 (7.5%) | 9 (1.8%) | 2 (7.2%) | 6 (4.3%) | 16 (1.4%) | 28 (1.3%) | 19 (1.3%) | 6 (1.7%) | 18 (3.7%) | 9 (12.7%) | 84 (11.5%) | 88 (4.9%) | 0 (0.0%) | 4 (1.2%) | 23 (4.9%) | 15 (2.0%) |
| Angola | 16 (5.3%) | 5 (6.0%) | 7 (10.6%) | 0 (1.7%) | 0 (0.0%) | 18 (7.1%) | 8 (2.0%) | 3 (1.5%) | 2 (1.4%) | 8 (2.0%) | 5 (5.4%) | 9 (12.2%) | 16 (14.2%) | 171 (6.0%) | 0 (0.0%) | 0 (0.1%) | 17 (6.1%) | 5 (1.7%) |
| Argentina | 134 (30.6%) | 37 (31.7%) | 56 (49.5%) | 8 (20.0%) | 7 (55.4%) | 198 (27.9%) | 224 (14.1%) | 731 (12.7%) | 162 (12.5%) | 141 (14.6%) | 769 (27.0%) | 103 (53.6%) | 2688 (60.7%) | 1371 (29.2%) | 16 (0.7%) | 219 (14.6%) | 228 (25.7%) | 248 (19.0%) |
| Armenia | 1 (4.9%) | 0 (4.8%) | 0 (0.0%) | 0 (2.7%) | 0 (0.0%) | 1 (4.5%) | 4 (1.6%) | 8 (1.7%) | 2 (1.7%) | 4 (1.7%) | 9 (4.1%) | 1 (7.2%) | 33 (11.5%) | 8 (4.9%) | 1 (0.4%) | 1 (1.7%) | 2 (3.4%) | 3 (3.4%) |
| Australia | 239 (25.6%) | 39 (24.3%) | 70 (43.2%) | 8 (17.1%) | 17 (40.9%) | 102 (21.8%) | 116 (10.7%) | 502 (8.7%) | 206 (10.3%) | 102 (11.7%) | 438 (21.1%) | 28 (48.4%) | 3262 (53.7%) | 226 (25.1%) | 25 (1.4%) | 145 (12.1%) | 189 (18.5%) | 310 (17.6%) |
| Austria | 68 (33.0%) | 12 (29.4%) | 47 (51.3%) | 3 (23.8%) | 13 (52.9%) | 33 (31.4%) | 68 (14.2%) | 153 (12.0%) | 68 (13.1%) | 44 (14.9%) | 291 (27.2%) | 28 (60.1%) | 1555 (64.6%) | 136 (33.3%) | 11 (1.5%) | 81 (15.5%) | 105 (24.5%) | 117 (22.2%) |
| Azerbaijan | 1 (2.1%) | 1 (3.0%) | 1 (5.5%) | 0 (1.2%) | 0 (0.0%) | 12 (2.4%) | 5 (0.8%) | 4 (0.8%) | 2 (0.8%) | 3 (0.9%) | 3 (2.1%) | 3 (4.4%) | 20 (5.7%) | 14 (2.5%) | 0 (0.0%) | 1 (0.7%) | 3 (2.0%) | 3 (1.2%) |
| Bahamas | 0 (0.0%) | 0 (7.7%) | 0 (5.5%) | 0 (1.2%) | 0 (6.1%) | 0 (8.8%) | 1 (3.9%) | 1 (3.6%) | 0 (3.5%) | 0 (4.8%) | 1 (8.3%) | 0 (0.0%) | 3 (20.5%) | 5 (10.8%) | 0 (0.3%) | 0 (3.0%) | 0 (6.4%) | 1 (6.7%) |
| Bahrain | 1 (11.6%) | 0 (0.0%) | 0 (5.5%) | 0 (6.3%) | 0 (6.1%) | 1 (11.3%) | 0 (2.9%) | 1 (2.5%) | 1 (2.7%) | 0 (3.3%) | 1 (8.1%) | 0 (0.0%) | 6 (24.6%) | 2 (10.5%) | 0 (0.1%) | 0 (3.4%) | 1 (10.5%) | 1 (4.5%) |
| Bangladesh | 182 (3.4%) | 7 (2.5%) | 39 (5.9%) | 4 (1.3%) | 71 (6.1%) | 377 (4.4%) | 27 (1.0%) | 12 (1.0%) | 14 (1.2%) | 12 (1.5%) | 18 (3.2%) | 69 (4.4%) | 212 (7.1%) | 356 (3.7%) | 0 (0.0%) | 6 (1.1%) | 15 (5.5%) | 15 (1.3%) |
| Barbados | 0 (2.0%) | 0 (9.9%) | 0 (0.0%) | 0 (1.3%) | 0 (6.1%) | 0 (2.4%) | 0 (1.8%) | 1 (1.9%) | 0 (1.7%) | 0 (2.1%) | 1 (4.9%) | 0 (0.0%) | 3 (12.3%) | 2 (5.5%) | 0 (0.2%) | 0 (2.5%) | 0 (2.8%) | 1 (4.1%) |
| Belarus | 23 (14.6%) | 9 (15.5%) | 10 (29.2%) | 1 (10.2%) | 4 (32.2%) | 7 (12.6%) | 53 (4.9%) | 88 (4.5%) | 50 (4.8%) | 8 (4.4%) | 60 (10.2%) | 7 (25.6%) | 184 (31.0%) | 122 (18.2%) | 1 (0.1%) | 46 (6.3%) | 22 (8.3%) | 55 (9.3%) |
| Belgium | 130 (34.1%) | 17 (30.6%) | 71 (50.6%) | 3 (18.0%) | 27 (50.7%) | 98 (32.5%) | 77 (14.8%) | 320 (11.9%) | 102 (12.7%) | 59 (13.7%) | 300 (26.0%) | 45 (63.1%) | 2085 (65.8%) | 172 (32.3%) | 13 (1.5%) | 103 (15.6%) | 236 (25.1%) | 244 (23.5%) |
| Belize | 0 (0.0%) | 0 (0.0%) | 0 (0.0%) | 0 (18.0%) | 0 (0.0%) | 0 (0.0%) | 0 (2.6%) | 0 (3.2%) | 0 (0.0%) | 0 (3.7%) | 0 (8.2%) | 0 (0.0%) | 1 (19.2%) | 3 (8.6%) | 0 (0.0%) | 0 (2.9%) | 0 (0.0%) | 0 (1.8%) |
| Benin | 1 (2.9%) | 1 (3.8%) | 1 (4.5%) | 1 (1.7%) | 0 (5.4%) | 4 (3.3%) | 1 (1.0%) | 1 (0.9%) | 1 (0.9%) | 2 (1.1%) | 3 (2.7%) | 0 (4.9%) | 3 (7.5%) | 21 (3.0%) | 0 (0.0%) | 0 (0.9%) | 0 (1.9%) | 2 (1.4%) |
| Bhutan | 0 (7.8%) | 0 (0.0%) | 1 (13.8%) | 0 (4.2%) | 1 (13.8%) | 1 (7.0%) | 1 (2.3%) | 0 (2.0%) | 0 (2.1%) | 0 (2.5%) | 0 (6.4%) | 1 (20.0%) | 4 (17.7%) | 3 (6.5%) | 0 (0.2%) | 0 (0.0%) | 0 (0.0%) | 0 (2.7%) |
| Bolivia | 1 (4.3%) | 1 (4.1%) | 4 (11.4%) | 0 (0.0%) | 0 (0.0%) | 4 (8.4%) | 10 (2.1%) | 5 (2.0%) | 2 (2.4%) | 14 (2.8%) | 10 (4.9%) | 3 (9.5%) | 40 (10.2%) | 150 (6.8%) | 0 (0.1%) | 4 (2.0%) | 4 (10.2%) | 8 (3.3%) |
| Bosnia Herzegovina | 11 (36.1%) | 6 (36.0%) | 6 (51.3%) | 1 (28.1%) | 3 (54.4%) | 7 (34.2%) | 40 (16.2%) | 56 (13.0%) | 46 (13.6%) | 33 (15.1%) | 73 (30.9%) | 21 (60.4%) | 382 (66.5%) | 95 (35.9%) | 4 (1.4%) | 18 (16.0%) | 54 (30.0%) | 30 (25.0%) |
| Botswana | 1 (10.0%) | 0 (5.1%) | 0 (19.3%) | 0 (7.0%) | 0 (0.0%) | 6 (14.1%) | 0 (3.8%) | 1 (2.8%) | 0 (2.6%) | 1 (4.4%) | 1 (8.4%) | 1 (31.2%) | 4 (22.6%) | 46 (10.1%) | 0 (0.0%) | 0 (2.0%) | 1 (13.9%) | 1 (4.5%) |
| Brazil | 600 (21.7%) | 130 (19.3%) | 308 (34.7%) | 39 (14.8%) | 60 (38.3%) | 460 (21.2%) | 865 (10.4%) | 1699 (10.0%) | 1104 (10.1%) | 704 (12.4%) | 1595 (22.3%) | 706 (42.1%) | 9934 (51.2%) | 3584 (19.1%) | 53 (0.7%) | 463 (11.5%) | 944 (19.1%) | 815 (15.5%) |
| Brunei Darussalam | 0 (13.0%) | 0 (18.9%) | 0 (0.0%) | 1 (7.7%) | 0 (0.0%) | 0 (19.5%) | 1 (5.4%) | 1 (4.0%) | 1 (4.0%) | 1 (5.8%) | 1 (13.0%) | 0 (0.0%) | 19 (37.1%) | 7 (13.1%) | 0 (1.3%) | 0 (5.5%) | 2 (16.8%) | 1 (6.5%) |
| Bulgaria | 37 (30.3%) | 8 (27.9%) | 11 (46.5%) | 6 (19.9%) | 5 (51.1%) | 12 (27.5%) | 69 (12.0%) | 146 (10.5%) | 81 (11.6%) | 31 (11.2%) | 133 (22.2%) | 21 (48.8%) | 626 (59.6%) | 279 (31.8%) | 8 (1.1%) | 43 (15.2%) | 85 (18.8%) | 57 (19.5%) |
| Burkina Faso | 1 (1.7%) | 1 (0.8%) | 0 (0.0%) | 0 (0.0%) | 0 (1.8%) | 2 (1.4%) | 1 (0.5%) | 0 (0.3%) | 0 (0.3%) | 4 (0.5%) | 6 (1.3%) | 1 (4.6%) | 6 (2.3%) | 12 (1.2%) | 0 (0.1%) | 0 (0.2%) | 6 (1.2%) | 1 (0.4%) |
| Burundi | 1 (3.4%) | 0 (3.7%) | 0 (9.5%) | 1 (2.8%) | 0 (14.4%) | 9 (5.1%) | 2 (1.6%) | 1 (1.2%) | 1 (1.3%) | 2 (1.6%) | 2 (3.9%) | 1 (6.4%) | 6 (7.4%) | 63 (4.3%) | 0 (0.0%) | 0 (0.4%) | 2 (4.1%) | 2 (1.7%) |
| Cambodia | 32 (11.7%) | 1 (4.8%) | 3 (9.1%) | 4 (4.4%) | 1 (10.6%) | 13 (12.7%) | 9 (3.4%) | 16 (3.0%) | 12 (3.2%) | 46 (4.2%) | 6 (7.0%) | 4 (20.9%) | 151 (19.2%) | 126 (9.9%) | 2 (0.4%) | 1 (2.3%) | 7 (12.8%) | 17 (4.6%) |
| Cameroon | 2 (2.1%) | 1 (1.6%) | 1 (3.4%) | 1 (0.9%) | 1 (4.6%) | 2 (2.2%) | 1 (0.5%) | 1 (0.5%) | 1 (0.5%) | 1 (0.5%) | 1 (1.4%) | 0 (3.9%) | 5 (3.8%) | 51 (2.0%) | 0 (0.0%) | 0 (0.2%) | 2 (2.8%) | 1 (0.8%) |
| Canada | 367 (31.0%) | 70 (27.8%) | 183 (48.1%) | 18 (20.2%) | 23 (47.6%) | 253 (29.7%) | 209 (15.0%) | 879 (12.3%) | 365 (12.6%) | 286 (16.3%) | 961 (28.5%) | 80 (61.2%) | 9707 (63.6%) | 488 (28.2%) | 56 (1.7%) | 409 (15.8%) | 1088 (27.3%) | 799 (23.4%) |
| Cape Verde | 0 (5.4%) | 0 (0.8%) | 0 (0.0%) | 0 (0.0%) | 0 (0.0%) | 0 (6.7%) | 0 (1.6%) | 0 (1.2%) | 0 (1.9%) | 0 (3.5%) | 0 (6.4%) | 0 (6.5%) | 1 (12.8%) | 2 (5.1%) | 0 (0.0%) | 0 (1.7%) | 0 (1.7%) | 0 (0.9%) |
| Central African Republic | 0 (2.1%) | 0 (2.9%) | 0 (0.0%) | 0 (1.5%) | 0 (0.0%) | 1 (3.4%) | 0 (1.0%) | 0 (0.8%) | 0 (0.8%) | 1 (1.2%) | 0 (2.6%) | 0 (6.4%) | 1 (7.6%) | 10 (3.5%) | 0 (0.0%) | 0 (0.6%) | 0 (3.6%) | 1 (1.6%) |
| Chad | 3 (2.5%) | 0 (0.0%) | 0 (0.0%) | 1 (3.4%) | 1 (9.8%) | 2 (2.3%) | 1 (0.9%) | 0 (0.3%) | 0 (0.6%) | 7 (1.0%) | 2 (2.3%) | 0 (1.5%) | 2 (9.7%) | 31 (2.8%) | 0 (0.0%) | 1 (0.7%) | 3 (2.9%) | 1 (4.3%) |
| Chile | 31 (24.3%) | 10 (24.5%) | 19 (45.7%) | 3 (19.7%) | 9 (46.7%) | 51 (16.9%) | 176 (10.9%) | 292 (11.4%) | 94 (11.8%) | 96 (13.2%) | 240 (23.3%) | 8 (27.4%) | 843 (47.6%) | 398 (25.5%) | 4 (0.4%) | 99 (13.4%) | 93 (17.9%) | 122 (17.5%) |
| China | 1247 (9.6%) | 312 (7.1%) | 201 (13.7%) | 472 (3.3%) | 83 (14.7%) | 5665 (10.0%) | 3565 (3.2%) | 3303 (2.9%) | 2559 (2.8%) | 3512 (3.5%) | 4500 (8.7%) | 622 (27.1%) | 95724 (23.8%) | 13544 (9.0%) | 1612 (2.6%) | 856 (3.2%) | 2370 (12.1%) | 1602 (4.6%) |
| Colombia | 66 (13.4%) | 24 (12.7%) | 31 (20.6%) | 5 (7.6%) | 7 (20.6%) | 41 (12.5%) | 167 (4.8%) | 186 (4.6%) | 60 (4.5%) | 77 (5.8%) | 176 (12.0%) | 32 (21.3%) | 904 (29.9%) | 556 (12.2%) | 5 (0.2%) | 55 (4.9%) | 53 (11.1%) | 115 (7.3%) |
| Comoros | 0 (0.0%) | 0 (0.0%) | 0 (0.0%) | 0 (0.0%) | 0 (0.0%) | 1 (4.3%) | 0 (1.5%) | 0 (1.3%) | 0 (1.4%) | 0 (1.1%) | 0 (3.6%) | 0 (0.0%) | 0 (7.0%) | 6 (3.5%) | 0 (0.0%) | 0 (0.0%) | 1 (4.6%) | 0 (0.7%) |
| Congo, Democratic Republic of | 4 (2.0%) | 1 (2.0%) | 1 (5.0%) | 3 (1.3%) | 1 (4.2%) | 15 (3.0%) | 8 (0.9%) | 4 (0.8%) | 6 (0.8%) | 11 (1.0%) | 7 (2.3%) | 3 (4.7%) | 20 (5.1%) | 248 (2.9%) | 0 (0.0%) | 1 (0.3%) | 7 (2.7%) | 8 (1.2%) |
| Congo, Republic of | 0 (3.1%) | 0 (4.1%) | 0 (6.3%) | 0 (1.6%) | 0 (0.0%) | 0 (3.2%) | 0 (0.9%) | 0 (0.8%) | 0 (0.8%) | 1 (0.9%) | 0 (2.3%) | 0 (6.2%) | 1 (5.7%) | 13 (3.2%) | 0 (0.0%) | 0 (0.2%) | 0 (3.7%) | 1 (1.4%) |
| Costa Rica | 6 (13.5%) | 2 (11.8%) | 2 (23.7%) | 0 (9.1%) | 3 (22.8%) | 2 (11.5%) | 19 (4.9%) | 22 (4.9%) | 8 (4.7%) | 11 (6.2%) | 21 (11.6%) | 2 (24.0%) | 48 (28.9%) | 35 (10.1%) | 0 (0.0%) | 4 (5.0%) | 8 (11.0%) | 13 (7.7%) |
| Croatia | 28 (34.6%) | 9 (31.7%) | 10 (51.5%) | 1 (24.5%) | 7 (54.4%) | 11 (32.9%) | 60 (14.7%) | 136 (12.7%) | 80 (13.4%) | 26 (14.3%) | 115 (28.1%) | 14 (64.3%) | 762 (65.9%) | 101 (37.0%) | 7 (1.4%) | 53 (16.2%) | 111 (31.4%) | 70 (22.2%) |
| Cuba | 79 (29.4%) | 18 (29.1%) | 28 (43.0%) | 5 (15.5%) | 4 (44.5%) | 42 (24.7%) | 64 (11.7%) | 228 (10.1%) | 54 (10.8%) | 57 (12.1%) | 123 (23.8%) | 144 (48.8%) | 1634 (56.1%) | 273 (24.3%) | 7 (1.4%) | 30 (11.8%) | 77 (21.2%) | 74 (17.6%) |
| Cyprus | 3 (25.2%) | 2 (33.5%) | 1 (46.9%) | 0 (21.3%) | 0 (0.0%) | 1 (25.6%) | 6 (11.8%) | 17 (9.5%) | 6 (9.1%) | 5 (10.5%) | 22 (20.6%) | 2 (56.5%) | 98 (58.0%) | 17 (27.6%) | 1 (0.9%) | 4 (13.0%) | 11 (19.2%) | 17 (16.7%) |
| Czechia | 118 (33.5%) | 22 (31.8%) | 86 (49.4%) | 3 (21.6%) | 10 (50.3%) | 35 (30.5%) | 70 (13.9%) | 252 (12.1%) | 121 (12.7%) | 57 (14.3%) | 347 (27.4%) | 29 (56.6%) | 1534 (61.8%) | 193 (29.3%) | 10 (1.1%) | 166 (15.5%) | 217 (25.6%) | 168 (22.8%) |
| C�te d'Ivoire | 7 (6.7%) | 3 (5.1%) | 1 (5.6%) | 0 (0.9%) | 1 (15.8%) | 2 (5.8%) | 7 (2.1%) | 5 (1.7%) | 2 (1.4%) | 7 (1.8%) | 8 (5.6%) | 1 (13.5%) | 13 (13.3%) | 150 (6.4%) | 0 (0.0%) | 1 (0.9%) | 3 (6.7%) | 2 (1.7%) |
| Denmark | 63 (40.6%) | 13 (35.8%) | 70 (56.0%) | 2 (27.4%) | 11 (56.4%) | 64 (39.6%) | 51 (20.0%) | 383 (17.1%) | 122 (17.0%) | 49 (20.5%) | 255 (36.0%) | 32 (70.0%) | 1830 (71.3%) | 124 (33.2%) | 9 (2.0%) | 87 (19.9%) | 248 (37.3%) | 138 (29.9%) |
| Djibouti | 0 (5.5%) | 0 (0.0%) | 0 (0.0%) | 0 (0.0%) | 0 (0.0%) | 1 (8.1%) | 0 (2.0%) | 0 (1.5%) | 0 (1.2%) | 0 (2.7%) | 0 (4.5%) | 0 (0.0%) | 1 (13.1%) | 5 (7.0%) | 0 (0.0%) | 0 (1.2%) | 0 (9.6%) | 1 (3.2%) |
| Dominican Republic | 16 (23.6%) | 4 (11.7%) | 15 (38.9%) | 2 (17.9%) | 5 (41.7%) | 21 (25.1%) | 39 (11.0%) | 76 (9.9%) | 8 (9.2%) | 45 (11.3%) | 63 (21.9%) | 39 (51.4%) | 380 (52.5%) | 214 (22.2%) | 1 (0.4%) | 4 (6.1%) | 25 (29.3%) | 35 (13.1%) |
| Ecuador | 9 (7.2%) | 3 (8.2%) | 4 (14.1%) | 1 (5.8%) | 0 (8.0%) | 4 (8.3%) | 37 (3.2%) | 31 (3.3%) | 11 (3.2%) | 26 (4.6%) | 34 (7.8%) | 4 (15.9%) | 129 (18.8%) | 136 (7.6%) | 0 (0.1%) | 8 (3.2%) | 12 (7.3%) | 26 (4.4%) |
| Egypt | 17 (1.9%) | 4 (1.9%) | 2 (2.8%) | 1 (0.8%) | 4 (3.0%) | 15 (2.2%) | 9 (0.5%) | 9 (0.5%) | 5 (0.4%) | 71 (0.7%) | 21 (1.6%) | 14 (6.9%) | 124 (6.1%) | 35 (2.7%) | 0 (0.0%) | 5 (0.5%) | 72 (2.7%) | 23 (0.8%) |
| El Salvador | 3 (6.1%) | 1 (5.0%) | 1 (8.5%) | 0 (4.4%) | 0 (0.0%) | 2 (5.6%) | 10 (2.8%) | 8 (2.7%) | 2 (2.4%) | 9 (3.6%) | 7 (6.5%) | 2 (13.8%) | 35 (17.3%) | 48 (7.6%) | 0 (0.0%) | 2 (2.9%) | 2 (5.6%) | 14 (4.6%) |
| Equatorial Guinea | 0 (3.0%) | 0 (0.0%) | 0 (3.6%) | 0 (0.0%) | 0 (0.0%) | 0 (2.4%) | 0 (0.7%) | 0 (0.6%) | 0 (0.5%) | 0 (1.0%) | 0 (2.0%) | 0 (0.0%) | 0 (3.9%) | 3 (2.6%) | 0 (0.1%) | 0 (0.3%) | 0 (2.5%) | 0 (0.9%) |
| Eritrea | 0 (0.6%) | 0 (0.8%) | 0 (0.0%) | 0 (0.4%) | 0 (0.0%) | 0 (0.9%) | 0 (0.2%) | 0 (0.2%) | 0 (0.2%) | 0 (0.3%) | 0 (0.6%) | 0 (1.7%) | 1 (1.6%) | 2 (0.8%) | 0 (0.0%) | 0 (0.1%) | 0 (0.9%) | 0 (0.4%) |
| Estonia | 9 (29.5%) | 3 (30.5%) | 4 (47.6%) | 0 (10.7%) | 3 (49.0%) | 4 (23.4%) | 20 (10.2%) | 33 (9.2%) | 17 (9.7%) | 6 (11.2%) | 37 (20.9%) | 3 (47.3%) | 128 (51.9%) | 32 (26.2%) | 1 (0.7%) | 16 (11.4%) | 14 (17.4%) | 18 (17.6%) |
| Eswatini | 0 (6.5%) | 0 (0.0%) | 0 (0.0%) | 0 (0.0%) | 0 (0.0%) | 0 (3.6%) | 0 (0.9%) | 0 (1.4%) | 0 (1.1%) | 0 (1.7%) | 0 (5.1%) | 0 (0.0%) | 1 (11.1%) | 21 (5.0%) | 0 (0.0%) | 0 (0.2%) | 0 (7.3%) | 0 (1.2%) |
| Ethiopia | 5 (0.9%) | 2 (0.7%) | 0 (1.2%) | 1 (0.5%) | 0 (2.5%) | 13 (1.4%) | 4 (0.3%) | 5 (0.3%) | 3 (0.2%) | 4 (0.4%) | 4 (0.8%) | 2 (2.0%) | 22 (1.8%) | 121 (1.5%) | 0 (0.0%) | 1 (0.2%) | 7 (1.4%) | 10 (0.5%) |
| Fiji | 2 (11.3%) | 0 (5.3%) | 0 (20.7%) | 0 (0.0%) | 0 (0.0%) | 1 (11.8%) | 1 (5.1%) | 1 (4.7%) | 1 (4.5%) | 1 (5.7%) | 1 (10.2%) | 1 (20.8%) | 6 (24.4%) | 20 (12.3%) | 0 (0.1%) | 0 (2.9%) | 1 (14.4%) | 1 (5.5%) |
| Finland | 57 (25.9%) | 9 (24.0%) | 14 (43.2%) | 1 (19.6%) | 2 (48.3%) | 24 (21.6%) | 27 (11.0%) | 123 (9.3%) | 55 (10.0%) | 26 (11.5%) | 164 (21.2%) | 7 (46.7%) | 668 (53.9%) | 44 (24.4%) | 4 (0.8%) | 53 (12.0%) | 45 (16.9%) | 58 (17.8%) |
| France (metropolitan) | 751 (30.6%) | 85 (29.1%) | 486 (49.5%) | 17 (18.1%) | 136 (48.8%) | 361 (29.1%) | 299 (11.3%) | 1595 (10.0%) | 777 (10.5%) | 425 (12.3%) | 1808 (22.6%) | 264 (56.7%) | 9793 (58.3%) | 1011 (31.7%) | 79 (1.4%) | 669 (12.7%) | 740 (20.1%) | 1164 (19.3%) |
| France, Guadeloupe | 1 (25.5%) | 0 (0.0%) | 0 (40.9%) | 0 (0.0%) | 0 (0.0%) | 1 (21.3%) | 5 (8.5%) | 6 (8.3%) | 2 (8.1%) | 1 (9.8%) | 7 (19.1%) | 0 (0.0%) | 17 (47.5%) | 6 (18.8%) | 0 (0.4%) | 1 (9.6%) | 2 (15.3%) | 2 (15.6%) |
| France, La R�union | 1 (5.6%) | 0 (0.0%) | 0 (8.9%) | 0 (0.0%) | 0 (0.0%) | 0 (7.6%) | 1 (2.6%) | 2 (1.7%) | 1 (2.2%) | 1 (2.9%) | 2 (5.1%) | 0 (14.7%) | 7 (9.2%) | 5 (7.3%) | 0 (0.6%) | 0 (2.1%) | 1 (8.1%) | 1 (2.7%) |
| France, Martinique | 0 (22.1%) | 0 (41.0%) | 0 (0.0%) | 0 (0.0%) | 0 (0.0%) | 1 (19.7%) | 4 (8.7%) | 6 (8.1%) | 2 (7.7%) | 2 (9.6%) | 7 (18.9%) | 0 (0.0%) | 17 (49.3%) | 6 (19.6%) | 0 (0.2%) | 1 (8.8%) | 3 (15.0%) | 5 (15.4%) |
| French Guyana | 0 (0.0%) | 0 (0.0%) | 0 (0.0%) | 0 (0.0%) | 0 (0.0%) | 1 (26.7%) | 1 (8.9%) | 1 (9.5%) | 0 (10.6%) | 0 (0.0%) | 2 (21.0%) | 0 (0.0%) | 5 (48.1%) | 3 (17.8%) | 0 (0.5%) | 0 (13.4%) | 1 (20.6%) | 1 (13.2%) |
| French Polynesia | 0 (0.0%) | 0 (0.0%) | 0 (0.0%) | 0 (0.0%) | 0 (0.0%) | 0 (0.0%) | 1 (8.6%) | 1 (7.3%) | 0 (3.7%) | 0 (1.1%) | 0 (12.2%) | 0 (0.0%) | 21 (47.8%) | 3 (21.8%) | 0 (2.0%) | 0 (10.9%) | 1 (11.7%) | 0 (2.8%) |
| Gabon | 1 (3.7%) | 0 (2.8%) | 0 (5.5%) | 0 (2.1%) | 0 (7.5%) | 0 (3.6%) | 0 (1.0%) | 0 (0.8%) | 0 (1.0%) | 1 (1.2%) | 1 (2.5%) | 0 (8.4%) | 1 (5.9%) | 9 (3.5%) | 0 (0.0%) | 0 (0.7%) | 0 (3.4%) | 0 (1.5%) |
| Gaza Strip and West Bank | 1 (6.5%) | 0 (5.3%) | 0 (0.0%) | 0 (2.3%) | 0 (0.0%) | 1 (5.8%) | 1 (1.8%) | 3 (1.7%) | 1 (1.6%) | 1 (1.9%) | 3 (5.4%) | 1 (21.6%) | 16 (15.5%) | 4 (6.1%) | 0 (0.1%) | 1 (1.4%) | 2 (7.4%) | 2 (2.2%) |
| Georgia | 4 (8.6%) | 1 (8.3%) | 1 (16.3%) | 1 (5.5%) | 1 (16.7%) | 2 (6.5%) | 9 (2.8%) | 7 (2.7%) | 7 (2.7%) | 4 (3.0%) | 17 (7.1%) | 2 (16.8%) | 43 (20.4%) | 31 (9.4%) | 0 (0.0%) | 2 (2.9%) | 5 (6.5%) | 8 (5.6%) |
| Germany | 657 (31.0%) | 115 (29.8%) | 610 (49.8%) | 29 (22.8%) | 125 (49.8%) | 533 (31.6%) | 780 (13.6%) | 1939 (10.6%) | 1075 (11.3%) | 466 (14.3%) | 2820 (25.9%) | 314 (57.7%) | 15761 (62.7%) | 1405 (30.9%) | 104 (1.4%) | 1077 (14.2%) | 1943 (25.4%) | 1432 (21.4%) |
| Ghana | 1 (2.4%) | 2 (2.0%) | 1 (3.3%) | 1 (1.0%) | 0 (0.0%) | 10 (3.5%) | 4 (0.9%) | 1 (0.9%) | 1 (0.7%) | 10 (0.9%) | 4 (2.3%) | 6 (8.4%) | 11 (5.2%) | 105 (3.4%) | 0 (0.0%) | 1 (0.4%) | 9 (3.6%) | 2 (0.7%) |
| Greece | 89 (34.1%) | 15 (32.2%) | 9 (57.8%) | 11 (27.6%) | 3 (51.0%) | 16 (33.2%) | 112 (16.1%) | 380 (13.1%) | 71 (13.2%) | 81 (14.2%) | 326 (30.1%) | 41 (65.9%) | 1540 (69.2%) | 179 (37.7%) | 10 (1.0%) | 109 (17.4%) | 272 (31.4%) | 207 (24.1%) |
| Guam | 0 (25.8%) | 0 (0.0%) | 0 (0.0%) | 0 (0.0%) | 0 (0.0%) | 0 (0.0%) | 1 (8.5%) | 1 (6.2%) | 1 (7.5%) | 0 (7.6%) | 1 (15.2%) | 0 (0.0%) | 11 (36.9%) | 4 (22.0%) | 0 (1.3%) | 0 (0.0%) | 0 (6.4%) | 0 (9.5%) |
| Guatemala | 4 (5.3%) | 1 (3.6%) | 2 (10.4%) | 0 (4.5%) | 0 (0.0%) | 4 (6.6%) | 24 (2.3%) | 10 (2.3%) | 1 (2.3%) | 36 (3.2%) | 10 (5.7%) | 3 (14.1%) | 34 (13.3%) | 108 (6.1%) | 0 (0.0%) | 3 (2.4%) | 3 (6.9%) | 12 (2.4%) |
| Guinea | 1 (3.2%) | 0 (1.8%) | 0 (5.3%) | 0 (0.6%) | 0 (2.5%) | 1 (4.2%) | 2 (1.1%) | 0 (0.9%) | 1 (0.9%) | 7 (1.0%) | 1 (2.4%) | 2 (7.4%) | 4 (5.0%) | 79 (3.1%) | 0 (0.0%) | 0 (0.4%) | 1 (3.9%) | 1 (1.8%) |
| Guinea-Bissau | 0 (2.3%) | 0 (2.1%) | 0 (0.0%) | 0 (0.0%) | 0 (0.0%) | 0 (2.7%) | 0 (0.6%) | 0 (0.6%) | 0 (0.5%) | 0 (0.7%) | 0 (2.2%) | 0 (0.0%) | 0 (3.9%) | 4 (2.0%) | 0 (0.0%) | 0 (0.4%) | 0 (2.1%) | 0 (1.6%) |
| Guyana | 0 (9.2%) | 0 (8.2%) | 0 (0.0%) | 0 (5.9%) | 0 (16.5%) | 0 (8.8%) | 0 (2.4%) | 1 (3.4%) | 0 (3.8%) | 1 (4.3%) | 1 (8.0%) | 0 (0.0%) | 2 (19.3%) | 11 (8.8%) | 0 (0.0%) | 0 (4.4%) | 0 (10.0%) | 1 (3.0%) |
| Haiti | 1 (3.9%) | 1 (2.9%) | 4 (10.8%) | 0 (4.0%) | 0 (11.4%) | 6 (5.3%) | 7 (1.9%) | 12 (2.4%) | 3 (2.3%) | 11 (2.5%) | 8 (5.1%) | 4 (10.0%) | 35 (10.7%) | 54 (6.2%) | 1 (0.2%) | 1 (1.0%) | 7 (5.5%) | 8 (3.7%) |
| Honduras | 2 (6.4%) | 2 (8.5%) | 1 (15.0%) | 0 (2.9%) | 0 (6.1%) | 3 (6.4%) | 7 (3.2%) | 6 (3.1%) | 2 (3.1%) | 6 (3.6%) | 10 (7.5%) | 8 (24.2%) | 43 (20.6%) | 78 (8.5%) | 0 (0.1%) | 2 (2.0%) | 4 (9.4%) | 9 (2.9%) |
| Hungary | 119 (38.2%) | 19 (31.8%) | 85 (55.1%) | 5 (26.1%) | 47 (55.8%) | 30 (29.9%) | 108 (14.8%) | 345 (12.8%) | 173 (13.7%) | 48 (15.1%) | 356 (27.8%) | 78 (60.6%) | 2795 (66.5%) | 293 (30.4%) | 22 (2.2%) | 129 (16.5%) | 242 (24.7%) | 155 (24.3%) |
| Iceland | 2 (29.2%) | 0 (35.6%) | 0 (0.0%) | 0 (0.0%) | 0 (0.0%) | 2 (29.9%) | 2 (13.8%) | 9 (10.7%) | 2 (10.9%) | 1 (13.2%) | 7 (28.1%) | 1 (64.6%) | 67 (64.7%) | 5 (25.5%) | 0 (1.7%) | 4 (14.9%) | 4 (26.2%) | 3 (19.4%) |
| India | 1963 (5.5%) | 192 (4.4%) | 391 (10.8%) | 68 (3.0%) | 645 (10.0%) | 1489 (6.0%) | 457 (2.1%) | 214 (1.7%) | 195 (1.6%) | 254 (2.2%) | 226 (4.6%) | 718 (16.4%) | 3089 (13.6%) | 7103 (5.6%) | 0 (0.0%) | 108 (1.7%) | 361 (7.4%) | 467 (2.3%) |
| Indonesia | 178 (7.1%) | 41 (4.6%) | 45 (10.7%) | 134 (3.1%) | 12 (11.6%) | 27 (7.9%) | 17 (2.1%) | 130 (1.7%) | 101 (1.7%) | 122 (2.2%) | 147 (5.7%) | 47 (17.1%) | 1446 (14.8%) | 1804 (4.9%) | 14 (0.1%) | 13 (1.9%) | 89 (7.6%) | 144 (2.6%) |
| Iran, Islamic Republic of | 47 (8.3%) | 8 (6.5%) | 7 (13.6%) | 4 (4.0%) | 8 (14.8%) | 131 (8.4%) | 195 (3.1%) | 96 (2.5%) | 38 (2.4%) | 76 (2.9%) | 91 (7.0%) | 84 (16.8%) | 657 (19.6%) | 105 (8.3%) | 5 (0.2%) | 20 (2.6%) | 62 (6.9%) | 106 (4.2%) |
| Iraq | 16 (10.1%) | 6 (7.9%) | 1 (23.5%) | 2 (4.5%) | 2 (12.7%) | 14 (9.5%) | 20 (3.5%) | 19 (3.3%) | 13 (3.1%) | 17 (4.4%) | 25 (9.4%) | 29 (24.4%) | 128 (28.5%) | 35 (11.1%) | 0 (0.0%) | 11 (2.9%) | 34 (9.8%) | 42 (3.9%) |
| Ireland | 33 (36.7%) | 6 (31.5%) | 15 (52.7%) | 1 (25.7%) | 4 (53.5%) | 56 (33.8%) | 30 (16.8%) | 117 (13.9%) | 62 (13.5%) | 37 (16.8%) | 102 (31.5%) | 26 (62.3%) | 1022 (66.9%) | 69 (28.7%) | 8 (1.8%) | 50 (16.8%) | 85 (31.2%) | 47 (22.9%) |
| Israel | 28 (23.1%) | 8 (22.2%) | 3 (41.9%) | 3 (16.0%) | 2 (40.5%) | 13 (22.2%) | 35 (10.2%) | 99 (8.4%) | 35 (9.5%) | 17 (10.3%) | 119 (20.9%) | 14 (52.4%) | 648 (54.6%) | 85 (25.7%) | 5 (1.0%) | 32 (11.5%) | 77 (21.6%) | 69 (16.3%) |
| Italy | 536 (26.9%) | 170 (27.7%) | 217 (45.5%) | 29 (19.6%) | 49 (46.7%) | 195 (26.2%) | 694 (12.0%) | 1878 (10.2%) | 650 (10.5%) | 460 (12.1%) | 1884 (22.9%) | 319 (52.1%) | 8937 (58.2%) | 701 (28.3%) | 64 (1.1%) | 615 (13.4%) | 1580 (21.4%) | 908 (19.5%) |
| Jamaica | 2 (12.4%) | 1 (11.6%) | 1 (30.7%) | 1 (6.3%) | 0 (22.7%) | 2 (12.1%) | 4 (5.1%) | 11 (4.9%) | 3 (4.7%) | 3 (5.8%) | 8 (11.7%) | 2 (29.1%) | 61 (31.4%) | 46 (12.3%) | 0 (0.4%) | 1 (3.4%) | 6 (11.7%) | 6 (7.2%) |
| Japan | 726 (16.0%) | 91 (15.6%) | 121 (26.8%) | 25 (11.2%) | 125 (30.5%) | 689 (16.1%) | 2888 (6.8%) | 2491 (5.3%) | 1014 (5.7%) | 810 (6.4%) | 3101 (12.9%) | 130 (36.5%) | 16360 (39.9%) | 1860 (17.0%) | 117 (1.1%) | 440 (6.9%) | 948 (10.1%) | 587 (10.8%) |
| Jordan | 6 (14.8%) | 3 (11.9%) | 1 (22.2%) | 2 (6.4%) | 1 (27.4%) | 5 (16.4%) | 6 (4.8%) | 20 (4.5%) | 8 (4.3%) | 5 (5.6%) | 14 (12.2%) | 8 (35.0%) | 63 (32.3%) | 22 (16.3%) | 0 (0.0%) | 4 (4.4%) | 12 (16.9%) | 19 (6.3%) |
| Kazakhstan | 15 (9.1%) | 8 (9.1%) | 6 (16.5%) | 2 (5.2%) | 4 (16.6%) | 27 (7.1%) | 37 (3.0%) | 26 (2.8%) | 21 (2.8%) | 16 (3.2%) | 43 (7.2%) | 6 (14.2%) | 113 (18.6%) | 147 (8.1%) | 0 (0.0%) | 11 (3.0%) | 8 (5.6%) | 17 (5.4%) |
| Kenya | 17 (4.5%) | 3 (3.0%) | 1 (6.5%) | 5 (1.7%) | 5 (7.5%) | 88 (5.1%) | 16 (1.5%) | 11 (1.2%) | 5 (1.1%) | 6 (1.5%) | 21 (4.1%) | 4 (9.0%) | 42 (8.7%) | 209 (3.6%) | 0 (0.0%) | 2 (0.8%) | 10 (5.0%) | 18 (2.1%) |
| Korea, Democratic People Republic of | 11 (8.7%) | 3 (6.5%) | 2 (14.7%) | 5 (4.5%) | 1 (14.7%) | 23 (8.1%) | 52 (2.8%) | 43 (2.5%) | 43 (2.5%) | 60 (3.0%) | 65 (6.8%) | 20 (21.2%) | 1473 (21.3%) | 196 (9.1%) | 23 (2.1%) | 12 (2.6%) | 40 (8.3%) | 28 (4.2%) |
| Korea, Republic of | 60 (10.9%) | 22 (9.7%) | 14 (17.9%) | 6 (6.3%) | 7 (18.6%) | 36 (12.3%) | 411 (4.3%) | 274 (3.5%) | 140 (3.4%) | 156 (4.4%) | 441 (9.7%) | 27 (36.3%) | 3112 (30.6%) | 370 (10.9%) | 34 (1.2%) | 60 (4.2%) | 155 (14.1%) | 94 (6.5%) |
| Kuwait | 1 (7.2%) | 0 (5.8%) | 0 (0.0%) | 0 (3.4%) | 1 (15.2%) | 1 (6.9%) | 1 (2.2%) | 2 (1.9%) | 1 (1.8%) | 1 (2.5%) | 2 (6.0%) | 1 (19.4%) | 10 (18.9%) | 4 (6.9%) | 0 (0.0%) | 0 (2.0%) | 2 (7.2%) | 2 (3.0%) |
| Kyrgyzstan | 3 (7.2%) | 1 (6.5%) | 1 (16.4%) | 0 (3.6%) | 3 (12.4%) | 4 (6.8%) | 8 (2.7%) | 3 (2.4%) | 2 (2.3%) | 4 (2.7%) | 9 (6.6%) | 2 (19.1%) | 38 (20.5%) | 42 (8.8%) | 0 (0.1%) | 2 (2.6%) | 2 (6.2%) | 3 (3.3%) |
| Lao People's Democratic Republic | 10 (10.2%) | 1 (7.3%) | 1 (12.3%) | 4 (4.3%) | 1 (13.5%) | 2 (11.6%) | 7 (2.8%) | 6 (2.7%) | 4 (2.5%) | 14 (3.4%) | 2 (6.7%) | 2 (21.5%) | 49 (18.5%) | 36 (9.0%) | 1 (0.5%) | 1 (2.8%) | 2 (11.1%) | 4 (2.6%) |
| Latvia | 8 (21.5%) | 2 (20.8%) | 7 (38.5%) | 0 (20.0%) | 1 (34.0%) | 7 (18.7%) | 15 (7.1%) | 21 (6.4%) | 16 (6.9%) | 5 (7.0%) | 37 (15.2%) | 4 (36.9%) | 99 (40.7%) | 47 (19.6%) | 1 (0.5%) | 19 (8.2%) | 16 (12.0%) | 21 (13.5%) |
| Lebanon | 12 (36.6%) | 5 (30.5%) | 2 (50.8%) | 2 (15.5%) | 0 (45.6%) | 6 (38.1%) | 12 (14.7%) | 34 (12.9%) | 14 (12.5%) | 13 (15.5%) | 39 (32.1%) | 30 (67.2%) | 359 (63.8%) | 53 (36.9%) | 3 (1.3%) | 13 (14.7%) | 67 (37.5%) | 41 (20.8%) |
| Lesotho | 1 (6.2%) | 0 (0.0%) | 0 (0.0%) | 0 (0.0%) | 0 (0.0%) | 7 (11.1%) | 0 (3.0%) | 0 (2.1%) | 0 (1.7%) | 0 (2.3%) | 1 (7.5%) | 0 (0.0%) | 8 (22.2%) | 39 (6.5%) | 0 (0.0%) | 0 (0.6%) | 2 (13.1%) | 0 (4.3%) |
| Liberia | 1 (3.0%) | 0 (3.3%) | 0 (2.4%) | 0 (0.4%) | 0 (0.0%) | 0 (4.0%) | 1 (1.2%) | 0 (1.1%) | 0 (1.0%) | 2 (1.2%) | 1 (3.0%) | 0 (5.8%) | 1 (5.8%) | 23 (3.2%) | 0 (0.0%) | 0 (0.4%) | 0 (3.8%) | 0 (1.8%) |
| Libya | 1 (1.8%) | 0 (1.0%) | 0 (4.4%) | 0 (0.7%) | 0 (1.2%) | 0 (1.9%) | 1 (0.5%) | 1 (0.4%) | 1 (0.4%) | 1 (0.6%) | 1 (1.3%) | 1 (5.6%) | 4 (4.4%) | 6 (2.2%) | 0 (0.0%) | 0 (0.5%) | 1 (2.2%) | 1 (0.7%) |
| Lithuania | 9 (17.9%) | 2 (14.9%) | 5 (35.3%) | 0 (7.8%) | 2 (30.8%) | 5 (15.2%) | 16 (5.3%) | 25 (5.2%) | 13 (5.4%) | 5 (5.6%) | 35 (10.7%) | 4 (31.5%) | 132 (33.9%) | 55 (18.6%) | 2 (0.6%) | 16 (6.6%) | 8 (8.5%) | 26 (10.1%) |
| Luxembourg | 3 (31.6%) | 0 (31.9%) | 1 (50.6%) | 0 (0.0%) | 1 (48.7%) | 2 (28.1%) | 4 (13.3%) | 12 (11.8%) | 5 (12.3%) | 3 (15.7%) | 10 (26.9%) | 3 (64.8%) | 93 (61.8%) | 6 (27.1%) | 1 (1.5%) | 6 (14.9%) | 8 (23.2%) | 9 (22.8%) |
| Madagascar | 2 (2.0%) | 0 (1.2%) | 1 (4.2%) | 1 (1.5%) | 1 (4.2%) | 7 (3.2%) | 3 (0.9%) | 1 (0.7%) | 2 (0.9%) | 4 (0.9%) | 2 (2.4%) | 1 (4.1%) | 6 (4.1%) | 117 (2.9%) | 0 (0.0%) | 0 (0.2%) | 12 (3.4%) | 3 (0.9%) |
| Malawi | 3 (3.8%) | 2 (4.4%) | 0 (0.0%) | 1 (2.5%) | 0 (0.0%) | 39 (4.4%) | 2 (1.7%) | 1 (1.5%) | 1 (0.7%) | 3 (1.4%) | 1 (3.3%) | 2 (14.6%) | 6 (11.5%) | 173 (3.7%) | 0 (0.0%) | 0 (0.2%) | 18 (4.5%) | 1 (1.4%) |
| Malaysia | 22 (5.6%) | 2 (3.7%) | 3 (7.5%) | 12 (2.3%) | 4 (9.5%) | 7 (6.2%) | 8 (1.6%) | 26 (1.3%) | 17 (1.4%) | 12 (1.8%) | 20 (4.4%) | 10 (18.2%) | 156 (11.9%) | 76 (4.0%) | 3 (0.2%) | 7 (1.7%) | 14 (6.8%) | 18 (2.1%) |
| Maldives | 0 (0.0%) | 0 (0.0%) | 0 (0.0%) | 0 (4.5%) | 0 (0.0%) | 0 (0.0%) | 0 (0.0%) | 0 (2.4%) | 0 (2.4%) | 0 (4.0%) | 0 (10.4%) | 0 (0.0%) | 2 (21.8%) | 4 (7.7%) | 0 (0.1%) | 0 (0.0%) | 0 (0.0%) | 0 (0.0%) |
| Mali | 4 (2.5%) | 1 (2.7%) | 1 (3.2%) | 0 (1.7%) | 0 (3.9%) | 5 (3.4%) | 6 (0.9%) | 2 (0.8%) | 1 (0.6%) | 3 (0.9%) | 3 (2.5%) | 1 (6.1%) | 6 (5.4%) | 81 (3.3%) | 0 (0.0%) | 0 (0.3%) | 11 (3.2%) | 1 (1.1%) |
| Malta | 5 (24.3%) | 1 (25.2%) | 0 (0.0%) | 0 (0.0%) | 0 (0.0%) | 1 (20.5%) | 3 (10.7%) | 8 (8.2%) | 3 (8.4%) | 1 (9.7%) | 11 (19.9%) | 2 (52.2%) | 36 (57.5%) | 4 (34.3%) | 0 (0.7%) | 3 (11.3%) | 5 (18.0%) | 4 (17.6%) |
| Mauritania | 1 (5.5%) | 1 (5.8%) | 0 (16.1%) | 0 (3.4%) | 0 (0.0%) | 1 (5.5%) | 1 (1.8%) | 1 (1.6%) | 0 (1.5%) | 2 (1.9%) | 1 (4.1%) | 0 (9.8%) | 2 (11.3%) | 24 (5.0%) | 0 (0.0%) | 0 (0.9%) | 1 (4.5%) | 1 (3.0%) |
| Mauritius | 2 (6.1%) | 0 (6.0%) | 0 (11.5%) | 0 (0.0%) | 0 (12.1%) | 1 (6.7%) | 1 (2.0%) | 2 (1.9%) | 1 (1.9%) | 1 (2.2%) | 2 (4.5%) | 0 (16.2%) | 8 (13.4%) | 8 (6.2%) | 0 (0.1%) | 0 (2.0%) | 1 (6.6%) | 1 (3.2%) |
| Mexico | 74 (9.8%) | 25 (7.7%) | 20 (15.5%) | 3 (5.2%) | 6 (17.3%) | 35 (9.7%) | 156 (3.5%) | 203 (3.4%) | 52 (3.3%) | 195 (4.5%) | 280 (9.3%) | 28 (16.4%) | 702 (22.0%) | 813 (7.9%) | 0 (0.0%) | 73 (3.4%) | 96 (9.3%) | 149 (4.4%) |
| Moldova | 2 (8.2%) | 0 (9.7%) | 1 (18.2%) | 1 (6.2%) | 0 (20.7%) | 1 (6.5%) | 8 (3.3%) | 15 (3.2%) | 10 (3.2%) | 7 (3.4%) | 19 (7.3%) | 2 (21.5%) | 62 (21.8%) | 38 (9.0%) | 1 (0.3%) | 5 (3.4%) | 4 (5.1%) | 7 (6.5%) |
| Mongolia | 2 (10.0%) | 1 (8.5%) | 1 (15.3%) | 0 (4.7%) | 0 (9.1%) | 22 (12.3%) | 10 (3.1%) | 2 (2.6%) | 1 (2.6%) | 43 (3.5%) | 5 (7.3%) | 1 (22.1%) | 20 (21.1%) | 32 (9.0%) | 0 (0.1%) | 1 (2.3%) | 1 (9.6%) | 1 (2.4%) |
| Montenegro | 5 (35.5%) | 2 (44.2%) | 3 (65.4%) | 0 (34.2%) | 1 (65.2%) | 3 (45.9%) | 3 (20.9%) | 13 (18.4%) | 5 (19.0%) | 6 (18.3%) | 13 (37.7%) | 6 (52.2%) | 78 (71.8%) | 26 (44.7%) | 0 (1.2%) | 4 (22.0%) | 6 (25.6%) | 4 (22.2%) |
| Morocco | 7 (2.3%) | 1 (1.9%) | 2 (4.7%) | 4 (1.2%) | 3 (3.9%) | 4 (2.3%) | 8 (0.8%) | 13 (0.9%) | 8 (0.9%) | 6 (1.2%) | 11 (2.2%) | 6 (6.0%) | 58 (6.2%) | 74 (2.8%) | 1 (0.0%) | 3 (0.8%) | 7 (2.4%) | 9 (1.4%) |
| Mozambique | 3 (3.3%) | 0 (0.0%) | 0 (3.2%) | 0 (0.0%) | 0 (5.2%) | 56 (5.8%) | 1 (2.0%) | 4 (1.8%) | 2 (1.9%) | 11 (1.4%) | 3 (4.5%) | 1 (5.2%) | 3 (5.0%) | 254 (4.7%) | 0 (0.0%) | 0 (0.2%) | 28 (5.7%) | 3 (1.2%) |
| Myanmar | 145 (17.3%) | 9 (10.7%) | 13 (17.4%) | 43 (6.1%) | 29 (24.1%) | 231 (22.1%) | 165 (5.6%) | 78 (5.7%) | 83 (6.7%) | 149 (7.2%) | 53 (15.2%) | 61 (38.2%) | 1425 (36.7%) | 880 (12.5%) | 10 (0.6%) | 13 (7.0%) | 74 (21.4%) | 57 (7.0%) |
| Namibia | 6 (15.4%) | 1 (9.1%) | 2 (25.2%) | 0 (5.8%) | 0 (0.0%) | 3 (20.0%) | 1 (4.6%) | 2 (4.4%) | 1 (4.5%) | 1 (4.8%) | 1 (13.5%) | 2 (34.9%) | 11 (28.1%) | 49 (14.0%) | 0 (0.0%) | 1 (2.7%) | 4 (18.6%) | 1 (5.1%) |
| Nepal | 52 (19.6%) | 5 (16.5%) | 5 (33.6%) | 1 (11.2%) | 11 (33.9%) | 22 (22.7%) | 45 (6.9%) | 14 (6.0%) | 17 (6.5%) | 11 (8.3%) | 41 (19.2%) | 49 (37.7%) | 361 (40.0%) | 357 (16.4%) | 0 (0.1%) | 3 (6.6%) | 31 (22.8%) | 25 (7.8%) |
| New Caledonia | 1 (21.6%) | 0 (0.0%) | 0 (0.0%) | 0 (0.0%) | 0 (0.0%) | 0 (26.5%) | 1 (7.1%) | 2 (6.8%) | 1 (7.1%) | 1 (8.4%) | 2 (16.9%) | 0 (0.0%) | 20 (35.8%) | 4 (16.0%) | 0 (2.3%) | 1 (8.4%) | 1 (13.9%) | 2 (13.2%) |
| New Zealand | 31 (26.3%) | 4 (25.9%) | 8 (42.7%) | 1 (20.5%) | 2 (42.9%) | 30 (23.5%) | 28 (13.2%) | 133 (10.6%) | 60 (11.5%) | 22 (15.0%) | 79 (24.3%) | 9 (51.1%) | 640 (56.3%) | 37 (24.7%) | 6 (1.5%) | 27 (13.7%) | 38 (23.1%) | 70 (20.3%) |
| Nicaragua | 1 (5.4%) | 0 (4.5%) | 1 (13.3%) | 0 (3.4%) | 0 (18.9%) | 1 (6.3%) | 5 (2.1%) | 5 (2.0%) | 1 (2.1%) | 8 (2.7%) | 6 (4.9%) | 2 (10.4%) | 18 (12.5%) | 50 (6.9%) | 0 (0.0%) | 1 (2.1%) | 1 (5.4%) | 5 (2.9%) |
| Niger | 1 (1.3%) | 0 (1.0%) | 0 (0.5%) | 0 (0.0%) | 0 (3.4%) | 0 (1.4%) | 0 (0.4%) | 1 (0.4%) | 0 (0.3%) | 2 (0.5%) | 1 (0.8%) | 0 (3.2%) | 0 (2.3%) | 10 (1.6%) | 0 (0.0%) | 0 (0.2%) | 1 (1.5%) | 2 (0.9%) |
| Nigeria | 14 (2.2%) | 9 (2.0%) | 3 (2.5%) | 5 (1.1%) | 2 (5.1%) | 7 (2.9%) | 8 (0.8%) | 12 (0.7%) | 9 (0.6%) | 19 (1.0%) | 9 (1.6%) | 6 (4.0%) | 49 (5.7%) | 319 (2.3%) | 0 (0.0%) | 3 (0.4%) | 8 (1.8%) | 19 (1.4%) |
| North Macedonia | 8 (35.9%) | 2 (40.0%) | 1 (45.6%) | 1 (26.9%) | 2 (58.5%) | 3 (34.0%) | 19 (15.4%) | 25 (13.2%) | 24 (13.9%) | 14 (15.6%) | 37 (30.6%) | 7 (61.6%) | 182 (65.6%) | 39 (36.5%) | 1 (1.1%) | 6 (15.8%) | 16 (32.6%) | 13 (23.6%) |
| Norway | 53 (24.7%) | 8 (23.5%) | 15 (41.7%) | 1 (17.6%) | 2 (45.4%) | 15 (17.0%) | 17 (9.9%) | 186 (8.7%) | 60 (9.9%) | 20 (10.9%) | 103 (17.6%) | 9 (38.4%) | 923 (51.2%) | 80 (21.4%) | 8 (1.7%) | 39 (11.6%) | 56 (13.9%) | 65 (16.8%) |
| Oman | 1 (3.0%) | 0 (1.6%) | 0 (0.0%) | 0 (1.2%) | 0 (0.0%) | 0 (4.2%) | 1 (1.1%) | 0 (0.8%) | 0 (0.9%) | 0 (1.3%) | 0 (2.7%) | 0 (9.1%) | 3 (8.9%) | 3 (3.8%) | 0 (0.0%) | 0 (0.7%) | 1 (3.8%) | 1 (0.9%) |
| Pakistan | 389 (7.5%) | 23 (5.5%) | 25 (10.4%) | 7 (2.6%) | 62 (11.3%) | 297 (6.6%) | 59 (2.3%) | 45 (2.0%) | 28 (2.0%) | 83 (3.1%) | 19 (6.6%) | 88 (13.5%) | 312 (16.5%) | 318 (6.7%) | 0 (0.0%) | 28 (2.2%) | 63 (6.4%) | 50 (1.6%) |
| Panama | 2 (8.2%) | 0 (12.7%) | 1 (18.2%) | 0 (4.5%) | 0 (0.0%) | 1 (9.4%) | 6 (3.0%) | 11 (3.2%) | 3 (2.9%) | 5 (4.1%) | 7 (8.3%) | 2 (25.3%) | 30 (22.2%) | 28 (7.4%) | 0 (0.0%) | 2 (3.0%) | 3 (10.7%) | 7 (4.2%) |
| Papua New Guinea | 79 (18.1%) | 2 (5.4%) | 2 (34.6%) | 0 (0.0%) | 1 (18.7%) | 16 (21.8%) | 14 (8.2%) | 7 (7.5%) | 8 (7.1%) | 24 (7.8%) | 5 (18.6%) | 8 (29.6%) | 85 (35.9%) | 162 (15.4%) | 1 (0.2%) | 1 (6.8%) | 6 (18.8%) | 13 (8.6%) |
| Paraguay | 4 (25.8%) | 2 (21.0%) | 3 (35.8%) | 0 (17.3%) | 0 (0.0%) | 8 (22.1%) | 13 (8.0%) | 45 (8.4%) | 8 (7.3%) | 10 (10.8%) | 33 (19.6%) | 4 (40.2%) | 71 (41.5%) | 178 (16.0%) | 0 (0.0%) | 5 (9.3%) | 10 (24.5%) | 21 (11.0%) |
| Peru | 14 (3.7%) | 4 (3.2%) | 3 (7.6%) | 1 (2.8%) | 3 (8.3%) | 4 (3.9%) | 40 (1.4%) | 31 (1.5%) | 6 (1.4%) | 22 (2.0%) | 35 (3.4%) | 5 (6.8%) | 110 (7.5%) | 184 (3.8%) | 2 (0.2%) | 10 (1.4%) | 15 (3.4%) | 28 (2.2%) |
| Philippines | 157 (18.6%) | 42 (13.7%) | 43 (27.3%) | 92 (8.0%) | 10 (25.2%) | 59 (17.6%) | 114 (6.2%) | 369 (5.8%) | 156 (5.4%) | 258 (6.9%) | 302 (14.9%) | 73 (31.0%) | 2325 (32.6%) | 1066 (12.5%) | 54 (0.8%) | 52 (5.2%) | 111 (17.6%) | 210 (6.2%) |
| Poland | 440 (35.2%) | 55 (31.3%) | 195 (52.5%) | 17 (26.6%) | 73 (54.2%) | 137 (31.2%) | 390 (15.6%) | 982 (14.0%) | 577 (14.5%) | 169 (15.4%) | 874 (29.1%) | 247 (59.0%) | 7331 (65.6%) | 1289 (32.2%) | 76 (1.6%) | 390 (17.1%) | 809 (26.4%) | 570 (23.7%) |
| Portugal | 54 (14.8%) | 9 (16.8%) | 11 (30.7%) | 3 (13.2%) | 5 (21.8%) | 8 (8.6%) | 73 (4.9%) | 128 (4.3%) | 68 (4.9%) | 23 (4.9%) | 97 (9.2%) | 12 (31.1%) | 653 (34.3%) | 164 (18.3%) | 6 (0.9%) | 39 (6.7%) | 57 (6.7%) | 56 (8.7%) |
| Puerto Rico | 8 (14.8%) | 1 (14.8%) | 1 (26.7%) | 0 (11.5%) | 1 (23.4%) | 4 (13.3%) | 6 (6.3%) | 37 (5.9%) | 12 (5.9%) | 11 (7.7%) | 25 (13.4%) | 3 (32.7%) | 102 (35.2%) | 34 (16.2%) | 0 (0.2%) | 6 (6.7%) | 17 (13.3%) | 16 (11.5%) |
| Qatar | 0 (3.2%) | 0 (0.9%) | 0 (0.0%) | 0 (1.9%) | 0 (0.0%) | 0 (2.4%) | 0 (0.9%) | 0 (0.9%) | 0 (0.9%) | 0 (1.2%) | 0 (2.0%) | 0 (0.0%) | 1 (8.2%) | 1 (3.4%) | 0 (0.0%) | 0 (1.1%) | 0 (2.6%) | 0 (1.2%) |
| Romania | 75 (23.3%) | 11 (20.7%) | 82 (40.3%) | 15 (15.3%) | 15 (38.4%) | 28 (20.0%) | 106 (8.2%) | 259 (7.7%) | 162 (8.2%) | 113 (8.6%) | 279 (18.0%) | 50 (40.4%) | 1506 (46.8%) | 844 (25.1%) | 22 (1.2%) | 99 (9.8%) | 159 (14.7%) | 132 (14.9%) |
| Russian Federation | 538 (17.2%) | 119 (16.8%) | 239 (31.1%) | 19 (11.8%) | 103 (30.4%) | 282 (12.6%) | 945 (5.4%) | 1528 (5.1%) | 723 (5.3%) | 252 (5.2%) | 1412 (12.5%) | 164 (25.8%) | 4552 (31.9%) | 3137 (17.1%) | 77 (0.5%) | 801 (6.5%) | 452 (9.6%) | 762 (10.6%) |
| Rwanda | 4 (12.5%) | 1 (12.1%) | 0 (19.9%) | 0 (4.3%) | 0 (0.0%) | 10 (19.1%) | 18 (5.1%) | 3 (3.6%) | 3 (4.2%) | 8 (6.7%) | 2 (11.5%) | 1 (44.6%) | 18 (29.2%) | 141 (16.3%) | 0 (0.0%) | 0 (0.7%) | 8 (24.4%) | 6 (3.2%) |
| Saint Lucia | 0 (11.7%) | 0 (0.0%) | 0 (16.7%) | 0 (0.0%) | 0 (0.0%) | 0 (0.0%) | 0 (4.2%) | 0 (3.6%) | 0 (4.3%) | 0 (5.4%) | 1 (8.7%) | 0 (0.0%) | 1 (24.7%) | 2 (11.1%) | 0 (0.1%) | 0 (4.6%) | 0 (0.0%) | 1 (8.4%) |
| Samoa | 0 (0.0%) | 0 (0.0%) | 0 (0.0%) | 0 (0.0%) | 0 (0.0%) | 0 (0.0%) | 1 (8.8%) | 1 (8.6%) | 0 (8.4%) | 0 (10.9%) | 1 (21.7%) | 0 (0.0%) | 8 (47.8%) | 2 (21.3%) | 0 (1.4%) | 1 (9.8%) | 1 (29.2%) | 0 (6.5%) |
| Sao Tome and Principe | 0 (0.0%) | 0 (0.0%) | 0 (0.0%) | 0 (0.0%) | 0 (0.0%) | 0 (2.7%) | 0 (0.7%) | 0 (0.8%) | 0 (0.0%) | 0 (1.2%) | 0 (2.5%) | 0 (0.0%) | 1 (9.1%) | 0 (3.4%) | 0 (0.7%) | 0 (0.0%) | 0 (2.7%) | 0 (0.0%) |
| Saudi Arabia | 9 (4.3%) | 1 (2.9%) | 1 (7.2%) | 1 (1.6%) | 3 (6.6%) | 4 (4.6%) | 3 (1.4%) | 7 (1.1%) | 6 (1.1%) | 5 (1.6%) | 6 (3.5%) | 3 (13.8%) | 34 (12.1%) | 16 (4.7%) | 0 (0.0%) | 3 (1.0%) | 6 (4.5%) | 9 (1.4%) |
| Senegal | 2 (1.9%) | 1 (1.9%) | 0 (3.9%) | 0 (1.2%) | 0 (0.4%) | 2 (2.0%) | 2 (0.6%) | 1 (0.5%) | 1 (0.5%) | 3 (0.6%) | 1 (1.6%) | 0 (3.4%) | 3 (4.0%) | 31 (1.5%) | 0 (0.0%) | 0 (0.3%) | 3 (1.6%) | 1 (0.9%) |
| Serbia | 71 (35.7%) | 15 (37.5%) | 12 (54.7%) | 5 (26.6%) | 11 (57.7%) | 18 (34.9%) | 75 (16.0%) | 168 (14.6%) | 131 (14.8%) | 53 (16.1%) | 219 (31.1%) | 34 (61.4%) | 1471 (66.5%) | 362 (40.0%) | 14 (1.9%) | 58 (17.2%) | 196 (34.0%) | 91 (24.2%) |
| Sierra Leone | 0 (3.6%) | 0 (0.0%) | 0 (0.0%) | 0 (0.0%) | 0 (0.0%) | 0 (0.0%) | 1 (1.9%) | 0 (1.8%) | 0 (1.3%) | 2 (1.3%) | 1 (5.6%) | 0 (0.0%) | 0 (3.1%) | 31 (6.5%) | 0 (0.0%) | 0 (1.5%) | 0 (5.2%) | 0 (5.4%) |
| Singapore | 11 (13.1%) | 3 (11.4%) | 3 (21.5%) | 9 (7.5%) | 1 (20.6%) | 3 (9.5%) | 15 (4.2%) | 40 (3.6%) | 20 (3.7%) | 15 (4.2%) | 38 (9.8%) | 3 (25.8%) | 288 (30.1%) | 37 (10.5%) | 5 (1.1%) | 9 (4.5%) | 10 (9.0%) | 20 (7.0%) |
| Slovakia | 30 (23.5%) | 5 (17.1%) | 26 (40.7%) | 1 (17.6%) | 8 (41.1%) | 9 (18.7%) | 27 (8.2%) | 86 (7.9%) | 49 (8.4%) | 17 (8.9%) | 86 (17.7%) | 11 (42.6%) | 372 (46.4%) | 133 (23.9%) | 4 (0.8%) | 41 (9.9%) | 51 (14.3%) | 50 (15.9%) |
| Slovenia | 16 (31.5%) | 2 (31.7%) | 7 (48.4%) | 0 (0.0%) | 1 (46.5%) | 7 (25.7%) | 23 (13.6%) | 47 (11.9%) | 26 (11.9%) | 18 (12.8%) | 52 (25.5%) | 8 (63.6%) | 439 (64.0%) | 40 (33.3%) | 3 (1.5%) | 18 (15.2%) | 43 (23.8%) | 38 (19.6%) |
| Solomon Islands | 1 (15.3%) | 0 (5.8%) | 0 (0.0%) | 0 (0.0%) | 0 (0.0%) | 1 (15.8%) | 0 (7.7%) | 0 (9.0%) | 0 (5.9%) | 1 (6.9%) | 0 (7.1%) | 1 (25.3%) | 3 (38.7%) | 12 (16.5%) | 0 (0.0%) | 0 (2.5%) | 0 (28.7%) | 0 (6.2%) |
| Somalia | 3 (3.5%) | 1 (2.6%) | 0 (6.9%) | 1 (1.5%) | 0 (6.1%) | 12 (5.2%) | 3 (1.2%) | 2 (0.9%) | 1 (0.9%) | 2 (1.4%) | 3 (3.2%) | 1 (9.9%) | 9 (7.1%) | 50 (4.3%) | 0 (0.0%) | 1 (0.5%) | 3 (5.5%) | 4 (1.5%) |
| South Africa | 106 (17.8%) | 18 (14.7%) | 28 (26.9%) | 4 (7.3%) | 13 (26.3%) | 199 (14.2%) | 45 (6.0%) | 91 (5.3%) | 72 (4.8%) | 60 (5.1%) | 197 (13.4%) | 53 (30.1%) | 1289 (38.0%) | 1179 (11.2%) | 9 (0.6%) | 23 (4.2%) | 64 (12.2%) | 67 (6.7%) |
| South Sudan | 2 (3.1%) | 0 (3.0%) | 0 (6.3%) | 1 (1.6%) | 0 (5.8%) | 8 (5.0%) | 2 (1.2%) | 1 (0.9%) | 1 (0.9%) | 2 (1.4%) | 2 (3.0%) | 1 (9.6%) | 4 (7.5%) | 32 (4.3%) | 0 (0.0%) | 0 (0.6%) | 2 (5.3%) | 1 (1.7%) |
| Spain | 350 (24.4%) | 66 (29.7%) | 121 (55.0%) | 21 (22.7%) | 39 (54.6%) | 95 (24.3%) | 328 (11.3%) | 1076 (10.0%) | 502 (11.3%) | 212 (11.1%) | 1017 (22.8%) | 184 (47.1%) | 4975 (59.3%) | 599 (29.7%) | 46 (1.3%) | 381 (14.0%) | 881 (20.0%) | 444 (17.4%) |
| Sri Lanka | 23 (4.1%) | 2 (2.9%) | 3 (8.0%) | 0 (2.6%) | 6 (7.7%) | 34 (4.5%) | 4 (1.4%) | 8 (1.3%) | 9 (1.3%) | 2 (1.7%) | 4 (3.4%) | 11 (10.3%) | 53 (9.4%) | 71 (4.5%) | 0 (0.0%) | 1 (1.4%) | 6 (4.6%) | 8 (2.2%) |
| Sudan | 4 (1.9%) | 1 (2.3%) | 1 (6.1%) | 3 (1.6%) | 2 (4.0%) | 9 (2.4%) | 3 (1.1%) | 3 (0.7%) | 4 (0.8%) | 4 (0.8%) | 3 (2.1%) | 4 (11.3%) | 24 (8.9%) | 46 (3.8%) | 0 (0.0%) | 2 (0.7%) | 6 (3.3%) | 8 (1.3%) |
| Suriname | 0 (12.3%) | 0 (0.0%) | 0 (0.0%) | 0 (0.0%) | 0 (0.0%) | 0 (0.0%) | 1 (5.9%) | 3 (5.5%) | 1 (5.2%) | 1 (5.8%) | 2 (13.8%) | 0 (0.0%) | 14 (34.4%) | 12 (14.6%) | 0 (0.7%) | 0 (6.6%) | 0 (9.4%) | 3 (10.5%) |
| Sweden | 126 (33.3%) | 9 (29.9%) | 27 (49.4%) | 2 (21.3%) | 9 (52.4%) | 59 (31.8%) | 59 (17.2%) | 385 (14.7%) | 134 (15.1%) | 66 (19.0%) | 388 (30.4%) | 17 (64.7%) | 1655 (67.2%) | 159 (28.3%) | 9 (1.2%) | 101 (17.7%) | 256 (30.6%) | 175 (25.9%) |
| Switzerland | 66 (34.0%) | 13 (34.3%) | 52 (50.2%) | 3 (22.0%) | 17 (50.9%) | 60 (33.9%) | 55 (14.2%) | 182 (11.3%) | 93 (12.5%) | 50 (14.7%) | 283 (27.8%) | 30 (66.0%) | 1454 (65.1%) | 87 (32.2%) | 8 (1.2%) | 45 (14.8%) | 230 (30.3%) | 117 (22.1%) |
| Syrian Arab Republic | 9 (9.6%) | 3 (8.9%) | 1 (18.8%) | 1 (3.2%) | 0 (11.5%) | 4 (7.9%) | 8 (3.0%) | 16 (2.7%) | 7 (2.4%) | 6 (3.2%) | 17 (7.7%) | 19 (20.2%) | 140 (21.5%) | 21 (10.1%) | 1 (0.2%) | 4 (2.6%) | 10 (7.9%) | 30 (4.7%) |
| Tajikistan | 1 (3.5%) | 0 (1.9%) | 1 (6.7%) | 0 (1.6%) | 1 (6.5%) | 2 (2.7%) | 7 (1.5%) | 1 (1.2%) | 1 (1.2%) | 2 (1.5%) | 1 (2.9%) | 1 (9.5%) | 13 (9.9%) | 11 (4.0%) | 0 (0.0%) | 0 (1.0%) | 1 (4.5%) | 2 (1.5%) |
| Tanzania, United Republic of | 18 (8.3%) | 7 (8.9%) | 4 (16.8%) | 10 (6.2%) | 10 (21.8%) | 139 (13.2%) | 21 (5.1%) | 14 (3.8%) | 27 (5.1%) | 30 (6.7%) | 22 (11.3%) | 6 (14.5%) | 51 (13.2%) | 1529 (14.1%) | 0 (0.0%) | 8 (2.3%) | 72 (13.8%) | 14 (5.1%) |
| Thailand | 175 (8.5%) | 17 (6.4%) | 22 (12.2%) | 24 (3.6%) | 11 (13.3%) | 48 (8.2%) | 44 (2.4%) | 123 (2.4%) | 104 (2.3%) | 257 (2.9%) | 84 (6.5%) | 30 (17.4%) | 1485 (17.9%) | 587 (6.8%) | 33 (0.8%) | 17 (2.5%) | 112 (8.3%) | 88 (4.1%) |
| The Netherlands | 267 (37.8%) | 30 (35.0%) | 73 (55.7%) | 6 (25.8%) | 27 (55.5%) | 255 (36.4%) | 138 (18.6%) | 898 (16.6%) | 331 (16.6%) | 125 (19.5%) | 595 (34.6%) | 85 (64.9%) | 4827 (68.8%) | 236 (31.3%) | 29 (2.0%) | 206 (19.6%) | 707 (34.0%) | 335 (28.4%) |
| The Republic of the Gambia | 0 (0.0%) | 0 (0.7%) | 0 (0.0%) | 0 (0.0%) | 0 (0.0%) | 0 (1.9%) | 0 (0.6%) | 0 (0.2%) | 0 (0.5%) | 0 (0.5%) | 0 (1.5%) | 0 (4.1%) | 0 (4.5%) | 5 (1.4%) | 0 (0.0%) | 0 (0.1%) | 0 (1.8%) | 0 (0.4%) |
| Timor-Leste | 0 (7.3%) | 0 (0.0%) | 0 (0.0%) | 0 (2.8%) | 0 (0.0%) | 0 (0.0%) | 0 (2.1%) | 0 (1.5%) | 0 (1.6%) | 0 (2.3%) | 0 (5.6%) | 0 (0.0%) | 4 (12.6%) | 4 (4.6%) | 0 (0.1%) | 0 (2.4%) | 0 (7.3%) | 0 (1.8%) |
| Togo | 2 (5.6%) | 2 (5.3%) | 1 (8.3%) | 0 (2.6%) | 0 (4.4%) | 5 (6.7%) | 2 (2.0%) | 1 (1.7%) | 1 (1.6%) | 2 (1.9%) | 1 (5.4%) | 0 (9.4%) | 3 (14.9%) | 33 (6.5%) | 0 (0.0%) | 0 (1.0%) | 1 (5.8%) | 1 (2.3%) |
| Trinidad and Tobago | 2 (11.5%) | 1 (10.2%) | 1 (19.8%) | 0 (8.1%) | 0 (0.0%) | 1 (10.9%) | 2 (4.6%) | 5 (4.4%) | 3 (4.3%) | 2 (5.9%) | 5 (10.1%) | 0 (0.0%) | 18 (27.4%) | 23 (11.9%) | 0 (0.1%) | 2 (4.8%) | 2 (10.8%) | 3 (6.6%) |
| Tunisia | 6 (5.9%) | 1 (4.5%) | 1 (12.4%) | 3 (2.5%) | 2 (7.7%) | 3 (5.6%) | 4 (1.9%) | 8 (1.6%) | 6 (1.6%) | 6 (2.1%) | 10 (4.9%) | 5 (16.0%) | 52 (14.2%) | 26 (6.2%) | 0 (0.0%) | 2 (1.8%) | 10 (5.7%) | 8 (2.7%) |
| Turkmenistan | 3 (7.1%) | 0 (7.2%) | 2 (12.1%) | 0 (4.1%) | 2 (13.0%) | 11 (5.8%) | 5 (2.6%) | 1 (2.4%) | 2 (2.4%) | 3 (2.6%) | 3 (5.9%) | 1 (12.0%) | 23 (17.7%) | 28 (6.1%) | 0 (0.0%) | 2 (2.3%) | 1 (4.5%) | 4 (3.6%) |
| T�rkiye | 145 (18.4%) | 44 (17.4%) | 16 (28.8%) | 31 (11.6%) | 30 (32.3%) | 104 (16.9%) | 319 (6.8%) | 402 (5.9%) | 205 (6.5%) | 123 (6.9%) | 485 (13.4%) | 94 (35.2%) | 3200 (40.0%) | 521 (20.1%) | 44 (1.1%) | 150 (7.6%) | 256 (13.1%) | 289 (10.4%) |
| Uganda | 8 (5.5%) | 1 (3.8%) | 2 (10.3%) | 5 (2.2%) | 0 (2.7%) | 67 (7.0%) | 5 (1.7%) | 5 (1.6%) | 4 (1.6%) | 14 (1.7%) | 9 (4.7%) | 2 (6.8%) | 27 (9.9%) | 368 (5.3%) | 0 (0.0%) | 1 (0.4%) | 11 (7.5%) | 6 (1.9%) |
| Ukraine | 79 (12.2%) | 28 (13.3%) | 49 (24.3%) | 8 (9.8%) | 12 (24.8%) | 22 (9.9%) | 132 (4.2%) | 239 (4.0%) | 181 (4.2%) | 36 (4.3%) | 240 (9.5%) | 22 (19.7%) | 831 (25.5%) | 664 (12.9%) | 9 (0.2%) | 123 (5.1%) | 66 (6.7%) | 148 (9.0%) |
| United Arab Emirates | 3 (8.7%) | 0 (5.1%) | 1 (14.2%) | 0 (4.4%) | 0 (0.0%) | 1 (8.6%) | 1 (2.6%) | 3 (2.4%) | 1 (2.3%) | 1 (2.7%) | 2 (7.0%) | 1 (18.7%) | 13 (19.8%) | 11 (7.9%) | 0 (0.0%) | 1 (2.5%) | 3 (7.3%) | 4 (3.5%) |
| United Kingdom | 871 (38.2%) | 120 (34.8%) | 380 (55.0%) | 20 (26.4%) | 98 (54.0%) | 1150 (37.1%) | 408 (18.9%) | 2283 (15.3%) | 1052 (15.9%) | 640 (19.4%) | 1876 (33.7%) | 282 (65.4%) | 17380 (69.6%) | 883 (27.3%) | 110 (1.7%) | 984 (19.7%) | 1949 (32.0%) | 1172 (27.6%) |
| United States of America | 2920 (33.7%) | 657 (30.8%) | 1235 (50.6%) | 139 (23.7%) | 240 (50.3%) | 1488 (37.3%) | 1663 (16.4%) | 6614 (12.8%) | 2495 (13.4%) | 2197 (17.6%) | 8887 (31.2%) | 1659 (67.7%) | 77286 (68.0%) | 4333 (31.1%) | 394 (1.9%) | 4258 (16.9%) | 5581 (29.8%) | 6188 (24.1%) |
| Uruguay | 13 (24.1%) | 4 (28.2%) | 4 (44.3%) | 1 (21.3%) | 2 (51.9%) | 16 (18.6%) | 25 (10.2%) | 76 (9.7%) | 26 (10.4%) | 6 (11.6%) | 93 (20.5%) | 9 (40.4%) | 283 (53.1%) | 101 (26.9%) | 3 (1.1%) | 35 (13.1%) | 23 (16.3%) | 23 (16.5%) |
| Uzbekistan | 8 (3.2%) | 2 (3.2%) | 5 (5.7%) | 1 (1.6%) | 4 (5.8%) | 30 (3.8%) | 15 (1.3%) | 8 (1.3%) | 7 (1.2%) | 9 (1.5%) | 15 (2.9%) | 3 (6.2%) | 51 (7.5%) | 96 (3.6%) | 0 (0.0%) | 3 (1.0%) | 4 (3.1%) | 12 (1.6%) |
| Vanuatu | 0 (3.1%) | 0 (2.7%) | 0 (0.0%) | 0 (0.0%) | 0 (0.0%) | 0 (5.0%) | 0 (1.6%) | 0 (2.3%) | 0 (1.3%) | 0 (1.4%) | 0 (0.0%) | 0 (6.9%) | 0 (13.0%) | 1 (3.9%) | 0 (0.0%) | 0 (0.0%) | 0 (4.1%) | 0 (0.8%) |
| Venezuela | 35 (15.3%) | 9 (12.6%) | 18 (25.8%) | 4 (9.2%) | 0 (21.4%) | 11 (15.0%) | 45 (5.6%) | 112 (5.4%) | 35 (5.0%) | 42 (6.4%) | 101 (13.3%) | 19 (26.2%) | 732 (32.0%) | 531 (13.4%) | 8 (0.7%) | 40 (5.4%) | 57 (13.6%) | 64 (7.8%) |
| Viet Nam | 28 (5.2%) | 7 (4.0%) | 9 (8.0%) | 40 (2.5%) | 40 (9.7%) | 23 (6.0%) | 101 (1.6%) | 43 (1.5%) | 63 (1.5%) | 108 (2.0%) | 20 (4.3%) | 37 (11.9%) | 821 (11.1%) | 229 (5.0%) | 13 (0.9%) | 13 (1.2%) | 22 (5.9%) | 63 (2.2%) |
| Yemen | 25 (14.9%) | 13 (12.9%) | 11 (30.3%) | 7 (5.7%) | 1 (12.4%) | 85 (16.0%) | 21 (5.1%) | 24 (4.8%) | 9 (4.0%) | 12 (4.6%) | 19 (11.5%) | 6 (33.7%) | 83 (25.2%) | 34 (16.2%) | 1 (0.2%) | 1 (1.7%) | 10 (14.5%) | 25 (5.0%) |
| Zambia | 3 (7.2%) | 2 (6.5%) | 1 (21.2%) | 1 (3.5%) | 0 (2.9%) | 19 (9.2%) | 5 (2.8%) | 1 (1.4%) | 1 (1.1%) | 4 (2.4%) | 3 (6.7%) | 3 (13.5%) | 11 (11.0%) | 233 (6.4%) | 0 (0.0%) | 0 (0.7%) | 12 (12.2%) | 3 (2.8%) |
| Zimbabwe | 4 (8.6%) | 1 (5.9%) | 1 (9.7%) | 0 (1.2%) | 1 (22.8%) | 50 (10.6%) | 18 (3.8%) | 5 (2.4%) | 4 (2.7%) | 9 (3.0%) | 9 (8.4%) | 2 (20.6%) | 43 (24.6%) | 277 (7.9%) | 0 (0.0%) | 1 (1.4%) | 12 (11.3%) | 5 (3.8%) |

**Table 5.2.3**. Proportion and number of cancer cases attributable to smoking by cancer site in men

| **Country** | **Lip, oral cavity** | **Salivary glands** | **Oropharynx** | **Nasopharynx** | **Hypopharynx** | **Oesophagus** | **Stomach** | **Colon** | **Rectum** | **Liver and intrahepatic bile ducts** | **Pancreas** | **Larynx** | **Trachea, bronchus and lung** | **Kidney** | **Bladder** | **Leukaemia** |
| --- | --- | --- | --- | --- | --- | --- | --- | --- | --- | --- | --- | --- | --- | --- | --- | --- |
| **N (PAF)** | **N (PAF)** | **N (PAF)** | **N (PAF)** | **N (PAF)** | **N (PAF)** | **N (PAF)** | **N (PAF)** | **N (PAF)** | **N (PAF)** | **N (PAF)** | **N (PAF)** | **N (PAF)** | **N (PAF)** | **N (PAF)** | **N (PAF)** |
| Afghanistan | 175 (25.3%) | 8 (23.0%) | 37 (38.2%) | 8 (9.7%) | 32 (36.2%) | 146 (28.1%) | 157 (12.4%) | 24 (9.5%) | 28 (9.4%) | 64 (12.1%) | 26 (12.5%) | 114 (57.9%) | 541 (53.1%) | 37 (10.0%) | 111 (29.4%) | 46 (6.8%) |
| Albania | 38 (59.1%) | 8 (56.0%) | 11 (71.3%) | 13 (43.6%) | 6 (72.1%) | 37 (66.0%) | 153 (32.5%) | 37 (23.8%) | 35 (22.9%) | 31 (28.4%) | 69 (35.8%) | 127 (88.5%) | 960 (84.7%) | 39 (29.9%) | 250 (60.3%) | 68 (36.7%) |
| Algeria | 102 (44.9%) | 41 (42.7%) | 42 (59.3%) | 300 (27.1%) | 32 (60.8%) | 73 (50.1%) | 392 (23.2%) | 438 (18.5%) | 295 (18.1%) | 94 (22.3%) | 185 (26.6%) | 719 (80.5%) | 3281 (76.1%) | 79 (18.8%) | 1400 (50.6%) | 215 (21.9%) |
| Angola | 75 (26.7%) | 10 (18.6%) | 78 (42.6%) | 5 (7.2%) | 2 (47.9%) | 211 (31.0%) | 32 (10.5%) | 12 (6.3%) | 16 (9.2%) | 71 (9.9%) | 22 (10.9%) | 146 (58.8%) | 115 (51.7%) | 15 (5.0%) | 62 (29.9%) | 18 (7.3%) |
| Argentina | 339 (42.5%) | 80 (41.1%) | 192 (59.4%) | 30 (26.7%) | 44 (59.6%) | 570 (39.8%) | 614 (21.4%) | 1289 (18.9%) | 317 (18.7%) | 346 (22.5%) | 615 (22.8%) | 734 (68.3%) | 6064 (70.6%) | 755 (22.1%) | 963 (34.0%) | 432 (25.5%) |
| Armenia | 36 (62.2%) | 6 (62.4%) | 4 (74.3%) | 4 (41.0%) | 8 (74.1%) | 25 (63.7%) | 123 (34.0%) | 101 (26.3%) | 30 (26.1%) | 94 (30.4%) | 94 (36.5%) | 108 (87.6%) | 973 (85.0%) | 40 (31.7%) | 184 (59.1%) | 37 (39.0%) |
| Australia | 577 (32.1%) | 64 (27.6%) | 430 (50.3%) | 29 (22.0%) | 86 (45.8%) | 330 (25.6%) | 240 (13.7%) | 621 (10.9%) | 376 (12.5%) | 405 (16.5%) | 273 (14.3%) | 261 (50.9%) | 4322 (58.8%) | 457 (15.2%) | 598 (17.4%) | 754 (21.1%) |
| Austria | 201 (47.4%) | 38 (44.1%) | 169 (63.1%) | 12 (34.1%) | 82 (63.4%) | 187 (48.3%) | 173 (24.3%) | 312 (19.1%) | 183 (20.0%) | 187 (24.2%) | 285 (26.1%) | 225 (77.9%) | 2304 (76.7%) | 217 (24.0%) | 619 (40.6%) | 225 (32.7%) |
| Azerbaijan | 79 (53.8%) | 38 (57.9%) | 17 (64.9%) | 11 (29.3%) | 20 (70.3%) | 284 (60.1%) | 440 (30.9%) | 113 (23.8%) | 80 (24.2%) | 88 (28.0%) | 66 (32.6%) | 278 (84.2%) | 1649 (82.3%) | 60 (26.6%) | 305 (57.5%) | 76 (23.4%) |
| Bahamas | 2 (26.8%) | 0 (0.0%) | 1 (43.5%) | 0 (0.0%) | 0 (0.0%) | 2 (26.7%) | 3 (11.9%) | 4 (10.6%) | 2 (10.8%) | 2 (13.9%) | 1 (12.1%) | 5 (51.4%) | 16 (52.2%) | 1 (12.7%) | 1 (30.4%) | 2 (11.7%) |
| Bahrain | 7 (35.5%) | 0 (0.0%) | 1 (52.2%) | 1 (23.6%) | 0 (0.0%) | 3 (45.2%) | 4 (18.8%) | 10 (15.1%) | 4 (13.7%) | 4 (17.2%) | 3 (20.3%) | 10 (77.4%) | 45 (70.9%) | 4 (16.8%) | 24 (44.2%) | 7 (16.1%) |
| Bangladesh | 4639 (43.0%) | 229 (41.5%) | 2145 (56.8%) | 182 (26.4%) | 4155 (57.1%) | 7704 (46.5%) | 1137 (20.1%) | 257 (16.4%) | 206 (14.5%) | 510 (21.5%) | 171 (21.5%) | 3583 (68.7%) | 6863 (68.4%) | 190 (21.8%) | 658 (48.1%) | 327 (18.6%) |
| Barbados | 2 (26.6%) | 0 (0.0%) | 3 (38.8%) | 0 (19.2%) | 3 (40.5%) | 1 (26.8%) | 3 (11.4%) | 5 (9.7%) | 3 (9.8%) | 1 (12.8%) | 3 (12.6%) | 5 (60.4%) | 17 (50.6%) | 2 (10.7%) | 2 (28.5%) | 3 (19.2%) |
| Belarus | 426 (56.7%) | 36 (55.1%) | 307 (69.3%) | 9 (41.0%) | 256 (69.5%) | 312 (58.9%) | 545 (31.6%) | 429 (25.7%) | 355 (25.9%) | 123 (29.4%) | 255 (33.4%) | 579 (85.4%) | 3313 (82.7%) | 452 (29.3%) | 705 (59.0%) | 251 (40.2%) |
| Belgium | 332 (46.1%) | 36 (41.4%) | 237 (61.6%) | 16 (30.2%) | 126 (61.8%) | 405 (48.1%) | 222 (24.1%) | 540 (18.9%) | 260 (19.2%) | 221 (24.5%) | 306 (25.8%) | 300 (76.5%) | 4203 (76.8%) | 302 (23.9%) | 1140 (39.6%) | 390 (32.9%) |
| Belize | 0 (0.0%) | 0 (0.0%) | 0 (0.0%) | 0 (0.0%) | 0 (0.0%) | 1 (38.6%) | 2 (13.9%) | 1 (15.2%) | 0 (0.0%) | 3 (18.4%) | 0 (14.1%) | 4 (62.7%) | 14 (64.7%) | 1 (18.6%) | 0 (0.0%) | 1 (9.0%) |
| Benin | 6 (17.7%) | 8 (19.0%) | 7 (35.9%) | 4 (11.0%) | 2 (33.7%) | 22 (19.7%) | 21 (7.7%) | 12 (6.9%) | 7 (7.0%) | 28 (6.7%) | 11 (9.5%) | 9 (34.1%) | 21 (35.0%) | 4 (7.4%) | 10 (19.4%) | 13 (7.4%) |
| Bhutan | 4 (22.7%) | 0 (0.0%) | 2 (35.2%) | 1 (13.7%) | 4 (35.6%) | 7 (24.5%) | 8 (10.3%) | 1 (9.9%) | 1 (8.2%) | 3 (10.0%) | 1 (11.4%) | 6 (55.3%) | 13 (51.2%) | 0 (10.0%) | 1 (29.7%) | 1 (10.1%) |
| Bolivia | 10 (23.3%) | 9 (15.8%) | 18 (34.8%) | 1 (16.3%) | 0 (0.0%) | 33 (27.3%) | 65 (10.6%) | 31 (10.5%) | 6 (10.0%) | 51 (12.7%) | 25 (13.5%) | 51 (45.4%) | 369 (48.0%) | 22 (11.0%) | 22 (26.6%) | 36 (9.4%) |
| Bosnia Herzegovina | 70 (58.7%) | 10 (54.3%) | 22 (71.5%) | 3 (43.3%) | 30 (71.9%) | 46 (59.9%) | 143 (32.6%) | 139 (25.3%) | 133 (25.2%) | 82 (30.0%) | 93 (34.9%) | 200 (85.3%) | 1563 (83.9%) | 68 (30.5%) | 271 (55.4%) | 68 (41.1%) |
| Botswana | 23 (37.3%) | 2 (40.3%) | 4 (53.0%) | 1 (13.3%) | 4 (52.6%) | 38 (41.2%) | 2 (16.6%) | 3 (12.8%) | 2 (12.1%) | 2 (15.9%) | 1 (18.2%) | 21 (67.0%) | 28 (61.3%) | 1 (11.0%) | 2 (44.7%) | 2 (12.2%) |
| Brazil | 2826 (34.2%) | 344 (32.3%) | 2368 (49.7%) | 146 (22.5%) | 678 (51.5%) | 2875 (32.6%) | 2614 (17.8%) | 2589 (15.8%) | 1995 (15.7%) | 1548 (19.5%) | 1463 (19.5%) | 4297 (59.8%) | 16294 (65.7%) | 1272 (18.1%) | 3672 (30.4%) | 1503 (22.7%) |
| Brunei Darussalam | 0 (0.0%) | 1 (41.8%) | 0 (0.0%) | 7 (29.9%) | 0 (0.0%) | 2 (47.0%) | 5 (20.5%) | 7 (16.1%) | 8 (16.0%) | 6 (20.0%) | 2 (23.7%) | 1 (79.5%) | 42 (72.9%) | 2 (19.3%) | 4 (42.5%) | 3 (24.2%) |
| Bulgaria | 160 (55.7%) | 23 (52.4%) | 65 (70.3%) | 29 (43.5%) | 57 (70.4%) | 102 (55.2%) | 275 (30.9%) | 433 (23.3%) | 258 (24.2%) | 124 (28.5%) | 224 (32.7%) | 314 (80.5%) | 2431 (83.4%) | 152 (29.8%) | 567 (44.3%) | 130 (37.5%) |
| Burkina Faso | 21 (15.0%) | 2 (7.2%) | 5 (21.3%) | 0 (0.0%) | 0 (0.0%) | 29 (17.9%) | 9 (7.0%) | 3 (3.4%) | 1 (2.7%) | 69 (6.2%) | 17 (7.2%) | 18 (29.3%) | 29 (29.7%) | 3 (2.0%) | 83 (18.1%) | 19 (5.7%) |
| Burundi | 14 (20.2%) | 3 (15.8%) | 7 (35.1%) | 4 (9.8%) | 5 (39.8%) | 74 (26.1%) | 14 (8.8%) | 6 (7.2%) | 6 (7.8%) | 17 (8.1%) | 4 (9.0%) | 20 (43.2%) | 37 (38.5%) | 2 (2.7%) | 13 (23.2%) | 8 (7.6%) |
| Cambodia | 136 (53.8%) | 14 (24.6%) | 56 (60.7%) | 75 (33.1%) | 54 (68.2%) | 167 (59.4%) | 83 (26.8%) | 98 (22.3%) | 88 (25.4%) | 598 (25.0%) | 30 (28.6%) | 128 (84.2%) | 1052 (76.6%) | 15 (10.4%) | 116 (58.4%) | 86 (24.2%) |
| Cameroon | 34 (22.4%) | 23 (18.8%) | 53 (35.2%) | 26 (11.6%) | 46 (33.2%) | 20 (25.1%) | 19 (8.6%) | 18 (7.5%) | 14 (7.2%) | 48 (6.5%) | 14 (10.4%) | 12 (42.9%) | 110 (42.6%) | 5 (4.0%) | 25 (21.5%) | 16 (7.9%) |
| Canada | 876 (39.3%) | 173 (36.7%) | 611 (55.7%) | 79 (28.2%) | 107 (55.5%) | 947 (41.5%) | 555 (20.4%) | 1304 (15.5%) | 713 (16.0%) | 691 (21.5%) | 791 (22.2%) | 617 (71.6%) | 11416 (71.8%) | 1109 (20.5%) | 3756 (33.8%) | 1487 (29.2%) |
| Cape Verde | 2 (19.1%) | 0 (0.0%) | 0 (37.6%) | 0 (0.0%) | 1 (35.8%) | 3 (22.5%) | 1 (8.6%) | 1 (7.0%) | 0 (8.9%) | 0 (6.7%) | 0 (6.9%) | 2 (41.8%) | 1 (44.1%) | 0 (3.7%) | 1 (10.8%) | 0 (6.5%) |
| Central African Republic | 4 (18.7%) | 2 (19.2%) | 2 (25.3%) | 3 (10.9%) | 0 (0.0%) | 4 (22.2%) | 3 (8.2%) | 2 (5.5%) | 2 (6.0%) | 8 (6.8%) | 2 (10.0%) | 4 (39.8%) | 11 (39.4%) | 1 (3.3%) | 5 (21.1%) | 5 (9.4%) |
| Chad | 6 (16.8%) | 4 (9.4%) | 0 (0.0%) | 3 (15.6%) | 0 (0.0%) | 9 (21.2%) | 9 (6.3%) | 2 (3.2%) | 5 (6.4%) | 72 (7.5%) | 6 (10.0%) | 10 (29.0%) | 45 (33.7%) | 3 (3.3%) | 43 (20.2%) | 4 (8.8%) |
| Chile | 78 (35.5%) | 26 (32.7%) | 42 (50.7%) | 3 (19.4%) | 20 (44.2%) | 132 (24.5%) | 539 (16.1%) | 333 (15.8%) | 194 (16.3%) | 165 (18.5%) | 155 (17.8%) | 98 (45.4%) | 1514 (57.8%) | 278 (18.7%) | 261 (23.4%) | 158 (21.5%) |
| China | 13670 (56.6%) | 3191 (53.1%) | 4437 (68.6%) | 13720 (37.4%) | 6282 (69.9%) | 99663 (59.5%) | 75001 (30.4%) | 36929 (24.1%) | 36781 (24.3%) | 70859 (26.4%) | 21909 (32.6%) | 23276 (85.7%) | 541601 (82.2%) | 13000 (27.5%) | 42254 (57.7%) | 16033 (34.1%) |
| Colombia | 98 (24.8%) | 61 (22.6%) | 158 (37.6%) | 18 (15.2%) | 37 (40.5%) | 147 (21.3%) | 580 (10.7%) | 373 (10.2%) | 166 (10.0%) | 157 (12.5%) | 163 (12.1%) | 307 (38.2%) | 2005 (48.0%) | 133 (10.6%) | 293 (18.9%) | 236 (13.0%) |
| Comoros | 2 (34.6%) | 0 (33.6%) | 1 (41.6%) | 0 (0.0%) | 0 (0.0%) | 9 (31.5%) | 1 (12.8%) | 1 (12.5%) | 0 (13.5%) | 2 (7.6%) | 0 (12.8%) | 1 (55.8%) | 3 (53.4%) | 0 (0.0%) | 4 (34.3%) | 1 (8.5%) |
| Congo, Democratic Republic of | 59 (19.1%) | 30 (17.4%) | 26 (29.2%) | 37 (11.4%) | 27 (33.4%) | 196 (23.7%) | 71 (7.6%) | 37 (6.1%) | 38 (6.1%) | 143 (6.6%) | 29 (8.6%) | 79 (35.6%) | 207 (34.8%) | 13 (3.2%) | 96 (20.7%) | 65 (8.2%) |
| Congo, Republic of | 3 (23.3%) | 1 (19.6%) | 1 (29.4%) | 1 (12.8%) | 0 (0.0%) | 2 (29.1%) | 5 (9.6%) | 3 (7.9%) | 3 (7.5%) | 14 (7.5%) | 2 (11.0%) | 5 (50.2%) | 13 (47.3%) | 1 (2.9%) | 3 (26.4%) | 6 (10.1%) |
| Costa Rica | 20 (30.9%) | 6 (29.6%) | 13 (47.6%) | 2 (13.7%) | 4 (48.6%) | 16 (30.3%) | 117 (15.4%) | 42 (13.7%) | 24 (13.3%) | 41 (17.1%) | 27 (16.3%) | 43 (58.4%) | 216 (60.1%) | 18 (14.9%) | 61 (29.3%) | 39 (19.0%) |
| Croatia | 110 (51.9%) | 15 (49.5%) | 93 (66.7%) | 6 (38.2%) | 69 (66.6%) | 93 (54.0%) | 162 (28.2%) | 328 (21.6%) | 212 (22.1%) | 100 (26.8%) | 119 (30.3%) | 203 (82.5%) | 2019 (81.0%) | 147 (27.0%) | 429 (49.8%) | 134 (35.8%) |
| Cuba | 395 (49.9%) | 57 (50.4%) | 410 (63.8%) | 49 (36.6%) | 114 (66.5%) | 397 (49.3%) | 225 (26.0%) | 360 (21.4%) | 83 (21.3%) | 132 (25.1%) | 157 (27.8%) | 1198 (77.2%) | 3460 (78.2%) | 110 (25.2%) | 486 (44.2%) | 193 (32.6%) |
| Cyprus | 15 (54.9%) | 4 (53.2%) | 4 (70.7%) | 1 (32.2%) | 1 (71.3%) | 8 (55.2%) | 28 (28.9%) | 53 (23.4%) | 22 (23.7%) | 24 (29.3%) | 35 (32.2%) | 34 (83.2%) | 373 (81.7%) | 20 (30.2%) | 130 (49.6%) | 48 (37.5%) |
| Czechia | 291 (48.4%) | 37 (45.2%) | 258 (63.3%) | 12 (32.9%) | 83 (63.8%) | 271 (49.1%) | 193 (26.2%) | 514 (21.1%) | 396 (21.6%) | 168 (25.6%) | 336 (27.7%) | 323 (77.9%) | 2913 (78.5%) | 518 (25.8%) | 999 (43.5%) | 338 (36.5%) |
| C�te d'Ivoire | 25 (25.5%) | 11 (19.5%) | 9 (38.8%) | 7 (13.8%) | 3 (34.0%) | 15 (27.4%) | 38 (11.5%) | 38 (9.6%) | 14 (10.0%) | 85 (9.7%) | 21 (12.8%) | 63 (48.7%) | 121 (49.9%) | 7 (5.4%) | 19 (26.3%) | 29 (13.3%) |
| Denmark | 134 (45.5%) | 20 (42.4%) | 197 (60.6%) | 5 (31.1%) | 61 (61.5%) | 217 (48.6%) | 118 (24.7%) | 512 (19.9%) | 233 (20.0%) | 108 (24.9%) | 173 (26.9%) | 148 (78.2%) | 1858 (77.2%) | 195 (23.7%) | 814 (44.4%) | 242 (34.4%) |
| Djibouti | 3 (41.3%) | 0 (0.0%) | 0 (0.0%) | 2 (27.7%) | 0 (0.0%) | 5 (45.9%) | 2 (16.3%) | 2 (13.7%) | 2 (11.8%) | 4 (16.6%) | 1 (22.5%) | 4 (65.2%) | 9 (57.8%) | 1 (13.7%) | 6 (44.4%) | 5 (20.2%) |
| Dominican Republic | 30 (32.0%) | 7 (30.6%) | 72 (48.2%) | 8 (18.4%) | 8 (53.5%) | 46 (37.3%) | 70 (16.9%) | 107 (13.8%) | 16 (13.0%) | 78 (17.2%) | 59 (17.7%) | 167 (67.9%) | 594 (66.3%) | 10 (11.1%) | 63 (37.4%) | 62 (16.4%) |
| Ecuador | 33 (27.8%) | 12 (24.0%) | 23 (41.3%) | 3 (19.7%) | 6 (48.0%) | 42 (28.2%) | 196 (12.6%) | 98 (11.6%) | 31 (11.1%) | 78 (14.8%) | 47 (14.1%) | 61 (48.5%) | 351 (52.8%) | 39 (11.3%) | 140 (26.2%) | 83 (13.0%) |
| Egypt | 352 (50.5%) | 128 (49.6%) | 63 (60.9%) | 77 (31.9%) | 80 (61.7%) | 471 (55.2%) | 409 (25.1%) | 347 (18.6%) | 153 (18.2%) | 4530 (25.5%) | 595 (29.1%) | 1344 (83.1%) | 4447 (79.4%) | 287 (22.0%) | 5710 (54.8%) | 797 (23.9%) |
| El Salvador | 7 (16.1%) | 2 (15.7%) | 6 (35.2%) | 0 (9.9%) | 2 (34.3%) | 11 (20.7%) | 32 (9.2%) | 21 (9.3%) | 5 (7.7%) | 23 (11.0%) | 11 (9.8%) | 15 (41.8%) | 75 (41.3%) | 9 (10.3%) | 12 (20.3%) | 30 (11.5%) |
| Equatorial Guinea | 3 (25.1%) | 0 (13.4%) | 2 (36.4%) | 1 (13.1%) | 0 (0.0%) | 2 (31.1%) | 1 (7.8%) | 1 (6.4%) | 1 (6.3%) | 3 (5.5%) | 1 (11.3%) | 4 (48.8%) | 4 (39.1%) | 0 (4.0%) | 2 (32.6%) | 0 (2.1%) |
| Eritrea | 4 (18.5%) | 1 (18.7%) | 0 (34.2%) | 2 (10.9%) | 0 (0.0%) | 5 (18.8%) | 2 (7.2%) | 3 (6.2%) | 2 (6.2%) | 5 (8.6%) | 1 (8.3%) | 6 (39.6%) | 15 (38.9%) | 2 (6.0%) | 7 (19.5%) | 6 (8.6%) |
| Estonia | 37 (53.1%) | 3 (52.8%) | 24 (68.1%) | 1 (39.9%) | 20 (68.3%) | 39 (51.5%) | 60 (28.1%) | 72 (22.0%) | 44 (22.5%) | 24 (27.8%) | 38 (30.2%) | 42 (76.6%) | 452 (80.3%) | 44 (27.8%) | 97 (40.8%) | 48 (37.2%) |
| Eswatini | 1 (19.1%) | 0 (0.0%) | 1 (28.6%) | 0 (3.8%) | 0 (0.0%) | 2 (19.6%) | 0 (6.5%) | 0 (4.4%) | 0 (5.6%) | 1 (5.8%) | 0 (7.2%) | 1 (36.7%) | 6 (29.0%) | 0 (0.0%) | 1 (21.5%) | 0 (4.2%) |
| Ethiopia | 43 (8.8%) | 20 (9.9%) | 15 (14.8%) | 23 (4.1%) | 6 (11.9%) | 82 (14.4%) | 39 (3.4%) | 57 (3.3%) | 41 (2.8%) | 72 (4.4%) | 22 (4.7%) | 102 (25.5%) | 251 (20.5%) | 28 (2.7%) | 162 (14.5%) | 86 (3.3%) |
| Fiji | 5 (39.2%) | 2 (37.7%) | 1 (54.2%) | 1 (30.3%) | 0 (0.0%) | 4 (36.8%) | 4 (16.1%) | 4 (15.4%) | 4 (16.7%) | 12 (18.3%) | 3 (20.8%) | 6 (58.2%) | 22 (58.3%) | 0 (19.1%) | 8 (42.8%) | 5 (13.3%) |
| Finland | 114 (38.4%) | 15 (35.0%) | 49 (56.0%) | 3 (28.4%) | 20 (55.8%) | 101 (37.1%) | 64 (19.0%) | 197 (15.7%) | 139 (16.3%) | 94 (20.6%) | 147 (20.4%) | 70 (66.2%) | 1257 (68.8%) | 134 (19.7%) | 320 (30.3%) | 136 (28.0%) |
| France (metropolitan) | 2058 (43.4%) | 180 (38.4%) | 1737 (59.9%) | 68 (28.0%) | 1264 (59.9%) | 1595 (43.1%) | 1068 (21.2%) | 3081 (18.0%) | 1734 (18.7%) | 2029 (23.3%) | 1827 (23.1%) | 2000 (71.2%) | 23467 (71.5%) | 2031 (22.0%) | 5802 (36.2%) | 2382 (31.7%) |
| France, Guadeloupe | 9 (44.0%) | 0 (0.0%) | 10 (57.2%) | 0 (32.7%) | 6 (61.5%) | 11 (43.4%) | 13 (18.6%) | 12 (17.1%) | 5 (16.6%) | 5 (18.7%) | 8 (21.1%) | 15 (73.6%) | 51 (72.0%) | 3 (21.1%) | 10 (39.3%) | 7 (27.3%) |
| France, La R�union | 14 (24.7%) | 0 (0.0%) | 15 (37.1%) | 1 (17.4%) | 11 (39.4%) | 15 (29.9%) | 11 (10.9%) | 9 (8.8%) | 6 (8.4%) | 7 (10.8%) | 7 (12.3%) | 17 (44.1%) | 115 (43.2%) | 3 (8.3%) | 17 (25.4%) | 7 (14.0%) |
| France, Martinique | 7 (45.3%) | 0 (0.0%) | 7 (58.9%) | 0 (32.7%) | 3 (63.1%) | 6 (42.9%) | 13 (19.4%) | 12 (16.5%) | 5 (16.4%) | 4 (18.5%) | 7 (21.1%) | 6 (73.8%) | 40 (72.7%) | 4 (21.1%) | 8 (37.5%) | 9 (31.6%) |
| French Guyana | 1 (34.0%) | 0 (41.1%) | 3 (50.7%) | 0 (23.5%) | 0 (0.0%) | 1 (35.8%) | 2 (14.7%) | 3 (15.8%) | 1 (15.6%) | 2 (17.4%) | 2 (17.8%) | 3 (58.6%) | 20 (61.6%) | 1 (16.5%) | 5 (33.2%) | 2 (15.4%) |
| French Polynesia | 3 (30.8%) | 0 (0.0%) | 0 (0.0%) | 1 (16.8%) | 0 (0.0%) | 4 (35.5%) | 4 (26.5%) | 4 (22.2%) | 2 (21.6%) | 5 (20.9%) | 2 (16.4%) | 4 (46.4%) | 88 (79.1%) | 3 (25.2%) | 6 (49.8%) | 2 (17.9%) |
| Gabon | 8 (21.5%) | 1 (19.5%) | 4 (35.4%) | 1 (12.4%) | 0 (37.1%) | 4 (26.2%) | 2 (7.6%) | 2 (6.7%) | 1 (6.7%) | 6 (6.5%) | 2 (9.8%) | 13 (44.0%) | 10 (39.7%) | 1 (5.4%) | 4 (25.9%) | 1 (3.6%) |
| Gaza Strip and West Bank | 13 (50.6%) | 4 (49.3%) | 3 (67.6%) | 6 (26.5%) | 0 (0.0%) | 7 (54.5%) | 23 (24.0%) | 38 (20.4%) | 21 (20.0%) | 22 (24.0%) | 23 (28.7%) | 59 (82.2%) | 383 (78.9%) | 15 (21.3%) | 84 (51.6%) | 30 (22.1%) |
| Georgia | 91 (56.1%) | 13 (54.2%) | 27 (69.3%) | 9 (39.6%) | 43 (68.4%) | 33 (55.7%) | 126 (28.5%) | 63 (22.5%) | 70 (22.4%) | 87 (26.4%) | 55 (30.6%) | 238 (83.4%) | 1106 (81.2%) | 56 (27.6%) | 249 (52.3%) | 68 (37.9%) |
| Germany | 1627 (46.2%) | 258 (41.8%) | 2095 (62.2%) | 97 (32.4%) | 1013 (62.0%) | 2652 (47.2%) | 2001 (24.0%) | 3524 (18.0%) | 2425 (19.5%) | 1620 (24.2%) | 2784 (25.4%) | 2387 (75.5%) | 27956 (75.8%) | 3112 (24.1%) | 8480 (39.6%) | 2822 (33.6%) |
| Ghana | 23 (14.1%) | 3 (11.3%) | 16 (24.8%) | 6 (4.0%) | 5 (22.1%) | 32 (15.9%) | 28 (5.6%) | 7 (5.1%) | 10 (3.7%) | 97 (3.6%) | 12 (7.3%) | 50 (30.9%) | 83 (27.6%) | 5 (2.8%) | 44 (16.6%) | 11 (4.5%) |
| Greece | 239 (55.9%) | 47 (56.9%) | 38 (71.5%) | 68 (45.4%) | 13 (71.9%) | 123 (60.3%) | 381 (32.5%) | 894 (24.3%) | 141 (25.0%) | 332 (30.2%) | 430 (35.1%) | 664 (84.3%) | 5384 (84.7%) | 384 (30.8%) | 2224 (52.2%) | 430 (39.9%) |
| Guam | 1 (34.9%) | 0 (0.0%) | 1 (58.4%) | 2 (25.0%) | 0 (0.0%) | 1 (39.7%) | 1 (16.2%) | 2 (14.9%) | 1 (15.9%) | 5 (16.8%) | 1 (17.6%) | 1 (61.7%) | 34 (62.5%) | 1 (16.9%) | 1 (33.3%) | 1 (29.3%) |
| Guatemala | 12 (23.7%) | 2 (27.1%) | 11 (42.7%) | 2 (17.1%) | 2 (45.2%) | 22 (24.9%) | 74 (10.3%) | 36 (9.6%) | 3 (8.2%) | 120 (12.2%) | 21 (11.8%) | 29 (43.2%) | 130 (44.2%) | 13 (8.7%) | 17 (25.6%) | 44 (8.2%) |
| Guinea | 11 (25.2%) | 2 (25.2%) | 3 (39.3%) | 1 (19.5%) | 2 (38.4%) | 6 (25.6%) | 22 (12.2%) | 4 (9.8%) | 3 (10.0%) | 115 (12.3%) | 4 (14.9%) | 20 (49.0%) | 73 (45.6%) | 2 (7.0%) | 10 (31.4%) | 4 (10.2%) |
| Guinea-Bissau | 1 (13.9%) | 0 (17.4%) | 0 (0.0%) | 0 (6.7%) | 0 (0.0%) | 1 (17.8%) | 2 (5.4%) | 1 (4.5%) | 0 (5.1%) | 4 (5.2%) | 0 (6.8%) | 1 (36.2%) | 4 (26.0%) | 0 (2.9%) | 2 (17.2%) | 0 (1.9%) |
| Guyana | 3 (31.9%) | 0 (0.0%) | 1 (47.5%) | 0 (0.0%) | 0 (46.7%) | 1 (25.4%) | 3 (12.9%) | 4 (11.0%) | 1 (13.4%) | 2 (12.3%) | 1 (13.1%) | 6 (51.9%) | 13 (51.8%) | 1 (15.8%) | 1 (22.8%) | 1 (5.8%) |
| Haiti | 13 (12.7%) | 13 (16.0%) | 18 (32.5%) | 3 (10.0%) | 1 (33.8%) | 18 (18.1%) | 41 (6.8%) | 22 (6.3%) | 2 (6.8%) | 38 (8.1%) | 14 (8.9%) | 15 (29.6%) | 74 (31.9%) | 7 (6.3%) | 21 (15.0%) | 19 (7.6%) |
| Honduras | 19 (32.5%) | 6 (30.6%) | 2 (50.3%) | 2 (19.1%) | 3 (34.6%) | 25 (34.1%) | 69 (14.6%) | 21 (13.2%) | 12 (12.3%) | 35 (12.6%) | 26 (16.3%) | 150 (63.7%) | 186 (59.6%) | 11 (11.8%) | 34 (33.7%) | 38 (10.5%) |
| Hungary | 425 (51.6%) | 56 (49.3%) | 328 (65.9%) | 22 (39.4%) | 320 (65.8%) | 238 (50.9%) | 280 (27.4%) | 722 (21.4%) | 487 (21.9%) | 169 (26.4%) | 334 (29.4%) | 540 (78.7%) | 4582 (80.3%) | 315 (25.8%) | 1002 (44.2%) | 268 (35.8%) |
| Iceland | 5 (38.4%) | 0 (0.0%) | 2 (56.9%) | 0 (0.0%) | 0 (0.0%) | 8 (44.6%) | 3 (22.1%) | 12 (16.3%) | 5 (16.0%) | 5 (21.9%) | 7 (23.3%) | 5 (75.2%) | 68 (73.8%) | 9 (22.0%) | 26 (35.9%) | 7 (28.2%) |
| India | 33389 (31.0%) | 1146 (30.4%) | 9919 (50.7%) | 842 (19.7%) | 12139 (50.5%) | 15753 (34.5%) | 6584 (15.3%) | 2651 (12.3%) | 2241 (11.9%) | 4138 (15.1%) | 1401 (16.1%) | 18539 (58.9%) | 34686 (58.8%) | 1436 (12.9%) | 6246 (35.4%) | 3972 (13.5%) |
| Indonesia | 2117 (52.8%) | 648 (42.3%) | 723 (65.2%) | 5001 (34.5%) | 127 (66.8%) | 558 (53.6%) | 762 (25.1%) | 2444 (22.1%) | 2292 (22.1%) | 4448 (24.3%) | 901 (28.5%) | 2820 (75.7%) | 21696 (74.5%) | 442 (22.3%) | 3249 (52.3%) | 1926 (22.7%) |
| Iran, Islamic Republic of | 291 (39.0%) | 62 (35.7%) | 31 (55.8%) | 43 (25.6%) | 31 (53.7%) | 813 (40.9%) | 2212 (20.5%) | 775 (15.8%) | 359 (15.5%) | 597 (18.7%) | 483 (22.1%) | 1626 (72.0%) | 5282 (69.7%) | 237 (18.2%) | 2210 (40.2%) | 931 (23.5%) |
| Iraq | 65 (46.4%) | 27 (44.5%) | 10 (56.7%) | 37 (27.3%) | 5 (57.8%) | 72 (53.4%) | 168 (24.5%) | 162 (18.6%) | 75 (18.1%) | 98 (23.8%) | 142 (28.2%) | 353 (83.1%) | 1853 (78.4%) | 99 (20.5%) | 609 (53.1%) | 235 (19.7%) |
| Ireland | 101 (40.4%) | 15 (40.8%) | 52 (55.8%) | 9 (30.9%) | 28 (57.1%) | 147 (41.6%) | 72 (20.5%) | 175 (16.5%) | 117 (16.9%) | 71 (20.7%) | 84 (22.7%) | 116 (71.6%) | 1136 (72.9%) | 116 (19.8%) | 261 (36.5%) | 106 (29.0%) |
| Israel | 44 (40.3%) | 24 (39.4%) | 11 (58.7%) | 11 (26.6%) | 6 (58.5%) | 47 (42.4%) | 98 (21.4%) | 202 (16.9%) | 78 (17.1%) | 44 (21.1%) | 143 (23.3%) | 123 (73.3%) | 1333 (73.3%) | 124 (20.3%) | 576 (38.0%) | 148 (28.1%) |
| Italy | 1224 (42.4%) | 302 (41.3%) | 620 (58.8%) | 114 (29.6%) | 288 (59.2%) | 768 (44.2%) | 1760 (22.8%) | 3590 (17.9%) | 1532 (18.0%) | 1805 (22.3%) | 1804 (24.1%) | 2659 (72.6%) | 21155 (74.4%) | 2036 (22.4%) | 10367 (38.1%) | 1912 (31.1%) |
| Jamaica | 5 (30.6%) | 3 (35.5%) | 10 (51.8%) | 3 (22.0%) | 2 (59.2%) | 18 (33.0%) | 32 (16.9%) | 51 (14.3%) | 16 (14.7%) | 9 (16.6%) | 14 (18.6%) | 32 (62.0%) | 227 (64.8%) | 3 (12.4%) | 23 (31.9%) | 17 (20.3%) |
| Japan | 3146 (48.1%) | 563 (47.3%) | 1541 (63.6%) | 193 (34.5%) | 2694 (63.6%) | 7381 (47.1%) | 21169 (25.2%) | 9449 (19.2%) | 6048 (19.8%) | 6771 (23.6%) | 6370 (27.0%) | 3668 (76.4%) | 74553 (77.9%) | 3557 (23.9%) | 10168 (40.5%) | 2672 (32.9%) |
| Jordan | 35 (53.4%) | 10 (53.0%) | 5 (69.7%) | 25 (33.3%) | 4 (68.7%) | 28 (58.9%) | 79 (28.2%) | 107 (23.0%) | 33 (22.2%) | 29 (26.1%) | 56 (31.8%) | 178 (84.8%) | 692 (81.2%) | 42 (25.8%) | 324 (57.1%) | 82 (25.4%) |
| Kazakhstan | 236 (54.3%) | 38 (50.6%) | 76 (67.6%) | 21 (33.2%) | 36 (67.1%) | 282 (50.7%) | 495 (26.7%) | 204 (21.8%) | 180 (21.9%) | 178 (24.9%) | 174 (29.2%) | 366 (78.4%) | 3015 (78.9%) | 157 (24.8%) | 280 (47.3%) | 92 (27.2%) |
| Kenya | 85 (23.2%) | 11 (20.4%) | 27 (41.4%) | 79 (12.4%) | 24 (33.7%) | 435 (26.9%) | 83 (9.5%) | 79 (8.8%) | 44 (8.3%) | 38 (8.1%) | 47 (12.2%) | 146 (45.4%) | 192 (45.5%) | 11 (4.5%) | 89 (26.4%) | 82 (9.5%) |
| Korea, Democratic People Republic of | 117 (54.3%) | 29 (48.8%) | 47 (67.8%) | 87 (36.3%) | 61 (68.2%) | 726 (54.7%) | 976 (28.1%) | 383 (23.0%) | 479 (23.0%) | 1050 (25.3%) | 270 (30.7%) | 397 (81.5%) | 6290 (80.0%) | 179 (25.7%) | 577 (51.9%) | 192 (27.0%) |
| Korea, Republic of | 601 (52.5%) | 159 (49.8%) | 476 (66.8%) | 130 (36.6%) | 332 (66.8%) | 1163 (54.2%) | 5437 (27.6%) | 2093 (21.4%) | 1579 (21.3%) | 2906 (25.7%) | 1313 (30.3%) | 971 (82.1%) | 17190 (81.1%) | 862 (25.8%) | 2405 (50.0%) | 761 (32.6%) |
| Kuwait | 20 (44.3%) | 5 (45.0%) | 3 (60.5%) | 9 (30.6%) | 5 (59.0%) | 11 (46.3%) | 12 (21.4%) | 30 (17.5%) | 14 (17.4%) | 22 (21.0%) | 17 (23.5%) | 32 (77.2%) | 115 (74.2%) | 14 (20.8%) | 56 (45.1%) | 36 (26.0%) |
| Kyrgyzstan | 38 (54.3%) | 13 (50.3%) | 10 (70.5%) | 8 (33.1%) | 17 (60.6%) | 66 (58.2%) | 181 (28.3%) | 21 (21.6%) | 26 (22.1%) | 73 (26.7%) | 40 (31.1%) | 60 (85.1%) | 481 (80.7%) | 21 (25.4%) | 51 (55.3%) | 27 (19.6%) |
| Lao People's Democratic Republic | 51 (45.1%) | 8 (42.4%) | 13 (53.3%) | 44 (29.2%) | 32 (62.5%) | 123 (52.6%) | 93 (23.8%) | 45 (19.8%) | 39 (21.0%) | 225 (23.1%) | 11 (24.8%) | 49 (77.1%) | 502 (72.2%) | 10 (21.1%) | 44 (55.1%) | 29 (15.9%) |
| Latvia | 64 (54.9%) | 12 (53.4%) | 38 (68.4%) | 1 (42.1%) | 40 (68.6%) | 55 (52.7%) | 90 (28.5%) | 67 (23.4%) | 61 (23.9%) | 32 (28.1%) | 62 (29.8%) | 78 (78.5%) | 626 (80.7%) | 83 (28.2%) | 177 (45.5%) | 54 (38.9%) |
| Lebanon | 31 (53.6%) | 12 (55.8%) | 3 (69.7%) | 9 (33.1%) | 1 (71.8%) | 19 (59.0%) | 46 (28.7%) | 103 (22.3%) | 35 (22.7%) | 28 (27.7%) | 60 (32.7%) | 103 (85.6%) | 827 (82.4%) | 53 (27.5%) | 294 (55.9%) | 102 (33.6%) |
| Lesotho | 9 (45.2%) | 0 (0.0%) | 4 (59.0%) | 0 (17.8%) | 0 (0.0%) | 27 (45.3%) | 2 (19.7%) | 5 (16.1%) | 3 (15.4%) | 6 (17.5%) | 3 (21.5%) | 8 (73.7%) | 21 (68.1%) | 1 (20.7%) | 4 (44.8%) | 1 (17.1%) |
| Liberia | 3 (15.4%) | 1 (16.7%) | 1 (26.8%) | 0 (8.3%) | 0 (32.1%) | 2 (18.8%) | 5 (7.3%) | 3 (6.4%) | 1 (6.6%) | 22 (7.1%) | 2 (9.4%) | 8 (36.3%) | 19 (29.9%) | 1 (4.2%) | 2 (23.4%) | 2 (7.9%) |
| Libya | 19 (50.8%) | 3 (45.4%) | 3 (66.9%) | 29 (32.3%) | 3 (59.9%) | 23 (53.1%) | 27 (24.0%) | 52 (18.4%) | 30 (18.7%) | 39 (22.7%) | 34 (27.3%) | 124 (81.3%) | 650 (77.8%) | 28 (22.1%) | 209 (49.3%) | 41 (25.9%) |
| Lithuania | 104 (50.0%) | 10 (46.6%) | 62 (63.6%) | 6 (35.4%) | 74 (64.7%) | 97 (48.0%) | 113 (24.7%) | 91 (20.9%) | 68 (21.1%) | 47 (24.1%) | 73 (26.2%) | 136 (76.6%) | 847 (76.7%) | 99 (24.4%) | 199 (45.6%) | 75 (34.5%) |
| Luxembourg | 5 (42.6%) | 1 (37.3%) | 4 (59.5%) | 1 (30.7%) | 4 (59.1%) | 10 (41.1%) | 5 (20.4%) | 22 (17.8%) | 9 (18.2%) | 10 (23.1%) | 14 (23.8%) | 14 (76.3%) | 154 (73.6%) | 8 (21.5%) | 25 (33.5%) | 12 (32.1%) |
| Madagascar | 54 (18.3%) | 11 (17.8%) | 48 (27.0%) | 6 (11.4%) | 37 (32.6%) | 101 (22.1%) | 29 (7.7%) | 9 (5.6%) | 9 (6.0%) | 33 (5.4%) | 10 (8.1%) | 31 (34.3%) | 72 (36.0%) | 3 (2.7%) | 80 (19.6%) | 25 (6.7%) |
| Malawi | 18 (18.6%) | 10 (14.5%) | 1 (53.3%) | 3 (7.4%) | 0 (0.0%) | 275 (27.7%) | 15 (9.2%) | 8 (7.9%) | 11 (9.0%) | 19 (6.7%) | 2 (11.5%) | 27 (55.2%) | 38 (44.7%) | 1 (1.3%) | 114 (29.8%) | 4 (5.6%) |
| Malaysia | 199 (46.0%) | 63 (36.8%) | 70 (59.2%) | 478 (29.2%) | 61 (60.6%) | 139 (44.5%) | 217 (21.2%) | 372 (18.0%) | 321 (18.0%) | 351 (20.2%) | 126 (23.2%) | 415 (72.9%) | 3030 (72.2%) | 147 (20.2%) | 338 (44.3%) | 230 (20.5%) |
| Maldives | 2 (48.9%) | 1 (21.4%) | 0 (0.0%) | 8 (29.2%) | 0 (0.0%) | 0 (0.0%) | 1 (32.4%) | 3 (18.8%) | 3 (17.7%) | 6 (22.0%) | 2 (28.1%) | 4 (79.1%) | 27 (73.3%) | 0 (25.9%) | 4 (59.7%) | 3 (20.3%) |
| Mali | 17 (17.6%) | 5 (17.7%) | 5 (33.4%) | 2 (9.3%) | 2 (27.5%) | 30 (23.2%) | 57 (7.9%) | 12 (6.6%) | 12 (5.6%) | 42 (7.3%) | 14 (9.6%) | 25 (40.9%) | 70 (36.3%) | 5 (3.0%) | 105 (24.2%) | 6 (6.1%) |
| Malta | 7 (45.2%) | 1 (41.7%) | 3 (62.6%) | 2 (37.7%) | 1 (63.3%) | 7 (42.7%) | 10 (21.9%) | 18 (17.2%) | 9 (17.1%) | 8 (21.7%) | 13 (24.7%) | 16 (75.2%) | 122 (74.5%) | 14 (23.0%) | 34 (35.1%) | 9 (30.8%) |
| Mauritania | 7 (26.8%) | 4 (26.1%) | 2 (49.2%) | 2 (18.8%) | 0 (46.0%) | 8 (28.1%) | 8 (11.1%) | 5 (9.5%) | 3 (9.1%) | 19 (10.6%) | 4 (13.6%) | 7 (47.3%) | 18 (48.4%) | 2 (6.8%) | 10 (26.2%) | 4 (11.6%) |
| Mauritius | 15 (41.4%) | 2 (44.9%) | 8 (55.7%) | 2 (27.2%) | 3 (54.8%) | 13 (43.3%) | 14 (18.2%) | 23 (17.0%) | 11 (16.6%) | 9 (18.8%) | 8 (20.8%) | 23 (70.6%) | 84 (67.3%) | 4 (18.4%) | 24 (45.7%) | 7 (22.9%) |
| Mexico | 229 (28.7%) | 70 (27.5%) | 123 (43.0%) | 32 (18.0%) | 54 (45.5%) | 336 (31.2%) | 617 (12.3%) | 684 (11.3%) | 236 (11.0%) | 616 (14.5%) | 420 (14.9%) | 495 (51.1%) | 2723 (53.8%) | 487 (11.3%) | 885 (31.8%) | 477 (11.8%) |
| Moldova | 136 (55.2%) | 7 (55.3%) | 138 (69.2%) | 13 (41.3%) | 79 (69.8%) | 72 (57.8%) | 123 (30.6%) | 152 (23.6%) | 105 (23.9%) | 128 (28.5%) | 91 (31.7%) | 277 (83.9%) | 974 (82.6%) | 63 (28.7%) | 216 (51.3%) | 50 (35.0%) |
| Mongolia | 11 (50.2%) | 3 (40.5%) | 7 (62.3%) | 4 (32.3%) | 4 (64.5%) | 111 (50.5%) | 142 (21.4%) | 14 (17.7%) | 4 (17.6%) | 313 (21.7%) | 20 (25.2%) | 22 (75.2%) | 303 (72.4%) | 13 (19.5%) | 18 (49.4%) | 4 (15.3%) |
| Montenegro | 7 (59.1%) | 1 (60.4%) | 3 (69.2%) | 0 (49.5%) | 5 (71.8%) | 10 (59.8%) | 12 (34.3%) | 24 (25.9%) | 15 (25.6%) | 11 (31.3%) | 15 (36.1%) | 32 (84.9%) | 262 (84.5%) | 9 (32.2%) | 45 (53.0%) | 10 (36.8%) |
| Morocco | 155 (38.5%) | 30 (32.7%) | 39 (50.7%) | 141 (21.6%) | 29 (46.3%) | 88 (35.2%) | 239 (17.0%) | 206 (14.5%) | 174 (14.6%) | 102 (17.1%) | 139 (19.1%) | 737 (67.1%) | 5303 (67.3%) | 61 (14.9%) | 680 (35.6%) | 147 (17.3%) |
| Mozambique | 26 (17.4%) | 7 (17.4%) | 24 (23.4%) | 0 (3.8%) | 0 (0.0%) | 143 (25.1%) | 6 (8.6%) | 4 (5.7%) | 9 (6.0%) | 42 (4.8%) | 8 (9.3%) | 23 (39.8%) | 56 (39.6%) | 1 (0.7%) | 100 (25.5%) | 10 (3.8%) |
| Myanmar | 677 (40.9%) | 60 (34.9%) | 333 (55.7%) | 352 (25.1%) | 683 (54.7%) | 1290 (43.6%) | 746 (19.9%) | 233 (16.8%) | 227 (16.7%) | 761 (19.0%) | 89 (21.9%) | 753 (66.9%) | 3362 (67.5%) | 71 (19.0%) | 308 (46.3%) | 188 (17.3%) |
| Namibia | 16 (24.0%) | 2 (20.3%) | 5 (37.8%) | 1 (11.7%) | 2 (38.2%) | 9 (29.2%) | 2 (8.7%) | 3 (6.9%) | 2 (7.1%) | 3 (7.6%) | 1 (10.6%) | 14 (47.8%) | 21 (40.5%) | 2 (6.2%) | 9 (30.6%) | 4 (10.0%) |
| Nepal | 251 (36.0%) | 42 (40.3%) | 25 (50.4%) | 5 (19.0%) | 44 (51.2%) | 61 (39.1%) | 170 (15.9%) | 57 (12.5%) | 24 (11.5%) | 65 (15.2%) | 25 (16.7%) | 193 (59.0%) | 879 (57.5%) | 10 (11.5%) | 130 (41.4%) | 44 (12.5%) |
| New Caledonia | 4 (36.9%) | 1 (34.8%) | 5 (51.2%) | 1 (27.8%) | 1 (49.5%) | 4 (35.5%) | 3 (12.8%) | 4 (12.7%) | 2 (12.5%) | 4 (15.5%) | 3 (17.0%) | 5 (53.5%) | 65 (56.9%) | 2 (13.5%) | 9 (30.4%) | 3 (21.6%) |
| New Zealand | 78 (32.3%) | 7 (32.8%) | 41 (50.6%) | 6 (22.1%) | 13 (50.7%) | 83 (31.3%) | 48 (16.8%) | 210 (14.9%) | 122 (15.0%) | 45 (19.0%) | 59 (17.5%) | 70 (61.0%) | 1053 (63.5%) | 83 (17.6%) | 144 (29.0%) | 124 (25.8%) |
| Nicaragua | 5 (27.1%) | 3 (20.0%) | 7 (38.6%) | 3 (16.0%) | 3 (45.0%) | 11 (28.9%) | 38 (12.1%) | 24 (11.3%) | 7 (10.5%) | 43 (13.7%) | 16 (13.9%) | 33 (56.2%) | 99 (52.8%) | 12 (12.1%) | 15 (31.0%) | 25 (8.8%) |
| Niger | 10 (12.1%) | 3 (8.3%) | 4 (21.8%) | 3 (9.2%) | 1 (26.8%) | 15 (13.7%) | 11 (3.9%) | 8 (3.7%) | 4 (3.0%) | 41 (5.0%) | 15 (5.6%) | 16 (26.8%) | 25 (25.8%) | 4 (2.8%) | 30 (15.3%) | 8 (5.1%) |
| Nigeria | 104 (12.8%) | 47 (10.6%) | 21 (13.2%) | 75 (7.2%) | 8 (16.6%) | 43 (13.2%) | 39 (4.7%) | 89 (4.5%) | 73 (4.4%) | 123 (4.9%) | 44 (5.9%) | 174 (25.6%) | 228 (28.1%) | 13 (1.5%) | 100 (10.5%) | 99 (9.2%) |
| North Macedonia | 24 (59.3%) | 4 (59.5%) | 9 (71.9%) | 3 (44.4%) | 4 (70.2%) | 18 (58.4%) | 79 (31.8%) | 67 (24.5%) | 63 (25.2%) | 37 (29.5%) | 46 (34.7%) | 91 (84.2%) | 728 (83.4%) | 20 (31.4%) | 126 (53.9%) | 28 (38.4%) |
| Norway | 94 (35.0%) | 14 (31.8%) | 62 (53.0%) | 2 (24.6%) | 14 (52.5%) | 77 (28.1%) | 53 (15.5%) | 237 (13.0%) | 135 (14.0%) | 51 (16.6%) | 92 (15.9%) | 49 (53.0%) | 1134 (63.0%) | 131 (16.6%) | 292 (22.1%) | 135 (24.3%) |
| Oman | 14 (24.5%) | 2 (21.3%) | 4 (35.7%) | 4 (15.1%) | 4 (38.3%) | 7 (29.6%) | 21 (11.5%) | 16 (8.1%) | 9 (8.5%) | 13 (11.4%) | 9 (12.1%) | 24 (59.2%) | 66 (53.2%) | 6 (9.0%) | 44 (31.4%) | 18 (10.1%) |
| Pakistan | 3692 (34.4%) | 167 (31.4%) | 406 (49.5%) | 89 (16.0%) | 672 (48.8%) | 1794 (37.6%) | 543 (15.8%) | 376 (12.3%) | 253 (12.1%) | 597 (17.5%) | 165 (20.1%) | 2174 (65.2%) | 5169 (68.3%) | 227 (14.4%) | 1740 (39.4%) | 357 (7.9%) |
| Panama | 8 (26.2%) | 2 (13.8%) | 12 (37.0%) | 2 (17.4%) | 6 (40.4%) | 10 (23.5%) | 31 (10.5%) | 24 (9.0%) | 11 (9.4%) | 13 (11.0%) | 11 (11.6%) | 17 (53.0%) | 125 (52.7%) | 12 (9.7%) | 19 (24.7%) | 20 (11.4%) |
| Papua New Guinea | 256 (35.9%) | 7 (35.6%) | 46 (51.0%) | 4 (27.0%) | 4 (50.6%) | 42 (31.5%) | 34 (12.3%) | 22 (11.8%) | 18 (11.8%) | 59 (13.5%) | 10 (15.8%) | 49 (51.6%) | 207 (53.9%) | 6 (13.6%) | 33 (31.3%) | 21 (11.4%) |
| Paraguay | 41 (38.7%) | 10 (35.9%) | 78 (55.8%) | 3 (27.4%) | 17 (53.0%) | 79 (45.4%) | 63 (21.5%) | 120 (19.1%) | 26 (17.6%) | 25 (21.6%) | 45 (24.2%) | 82 (74.3%) | 537 (72.6%) | 28 (20.5%) | 72 (48.1%) | 51 (21.9%) |
| Peru | 40 (13.1%) | 13 (11.2%) | 38 (24.3%) | 6 (9.1%) | 18 (25.3%) | 38 (14.1%) | 237 (6.6%) | 118 (7.1%) | 32 (6.6%) | 84 (8.9%) | 58 (7.3%) | 46 (25.7%) | 404 (28.0%) | 90 (7.0%) | 87 (13.7%) | 140 (8.5%) |
| Philippines | 540 (50.4%) | 174 (45.2%) | 259 (64.0%) | 814 (32.1%) | 123 (66.3%) | 528 (49.7%) | 596 (25.7%) | 1595 (22.5%) | 920 (22.1%) | 2105 (23.9%) | 567 (28.1%) | 1302 (76.7%) | 12555 (75.7%) | 463 (24.1%) | 720 (49.1%) | 690 (18.8%) |
| Poland | 1367 (48.3%) | 164 (46.2%) | 842 (63.4%) | 46 (31.6%) | 613 (63.4%) | 779 (49.3%) | 1178 (26.4%) | 1810 (21.5%) | 1508 (21.8%) | 391 (25.2%) | 804 (28.0%) | 1970 (76.8%) | 15098 (78.6%) | 875 (25.9%) | 3811 (42.6%) | 976 (35.5%) |
| Portugal | 396 (42.5%) | 29 (39.8%) | 317 (59.5%) | 24 (29.6%) | 203 (58.8%) | 251 (42.2%) | 448 (20.7%) | 656 (17.1%) | 378 (17.4%) | 268 (21.1%) | 241 (21.9%) | 471 (68.4%) | 3051 (71.7%) | 227 (21.6%) | 824 (31.0%) | 266 (28.8%) |
| Puerto Rico | 38 (29.4%) | 5 (28.4%) | 41 (44.7%) | 4 (20.5%) | 9 (44.9%) | 35 (30.0%) | 17 (14.4%) | 88 (12.8%) | 36 (13.1%) | 51 (16.8%) | 32 (15.3%) | 69 (58.9%) | 276 (58.6%) | 24 (15.1%) | 76 (27.6%) | 38 (22.8%) |
| Qatar | 9 (31.5%) | 2 (26.5%) | 2 (52.1%) | 2 (23.0%) | 2 (53.0%) | 4 (36.9%) | 6 (14.0%) | 9 (12.7%) | 6 (12.3%) | 8 (16.5%) | 4 (17.6%) | 12 (69.1%) | 48 (62.6%) | 4 (14.0%) | 18 (37.6%) | 14 (16.9%) |
| Romania | 849 (50.3%) | 51 (49.8%) | 892 (65.4%) | 85 (32.9%) | 479 (65.7%) | 301 (48.0%) | 643 (25.3%) | 945 (21.2%) | 754 (21.7%) | 586 (24.7%) | 492 (26.7%) | 1279 (76.2%) | 6583 (77.5%) | 408 (24.9%) | 1769 (43.4%) | 381 (34.8%) |
| Russian Federation | 3858 (58.5%) | 394 (55.5%) | 2599 (70.8%) | 168 (39.8%) | 1770 (71.6%) | 4055 (57.1%) | 6893 (32.3%) | 6270 (26.7%) | 4136 (26.9%) | 2074 (30.0%) | 3612 (34.2%) | 5432 (83.1%) | 46747 (83.4%) | 5166 (30.6%) | 7889 (53.8%) | 2827 (38.7%) |
| Rwanda | 19 (29.8%) | 4 (23.5%) | 13 (43.3%) | 4 (14.9%) | 2 (53.0%) | 38 (36.8%) | 35 (11.8%) | 8 (9.7%) | 12 (10.5%) | 32 (11.4%) | 5 (13.4%) | 43 (63.7%) | 76 (47.3%) | 1 (3.0%) | 11 (37.2%) | 10 (9.3%) |
| Saint Lucia | 3 (34.7%) | 0 (0.0%) | 0 (31.3%) | 0 (0.0%) | 0 (0.0%) | 1 (34.9%) | 3 (15.1%) | 2 (13.4%) | 1 (15.1%) | 1 (16.8%) | 1 (16.9%) | 2 (59.5%) | 13 (59.6%) | 0 (12.6%) | 0 (24.2%) | 2 (26.1%) |
| Samoa | 2 (55.9%) | 0 (0.0%) | 0 (0.0%) | 1 (34.3%) | 0 (0.0%) | 2 (56.2%) | 3 (28.0%) | 3 (23.5%) | 3 (22.9%) | 2 (26.5%) | 1 (31.3%) | 3 (83.8%) | 30 (79.0%) | 2 (28.3%) | 3 (54.3%) | 1 (29.9%) |
| Sao Tome and Principe | 0 (0.0%) | 0 (0.0%) | 0 (0.0%) | 0 (0.0%) | 0 (0.0%) | 0 (25.8%) | 1 (6.9%) | 0 (9.7%) | 0 (9.4%) | 1 (5.7%) | 0 (4.2%) | 1 (40.0%) | 3 (33.0%) | 0 (0.0%) | 1 (23.7%) | 0 (0.0%) |
| Saudi Arabia | 104 (37.0%) | 13 (32.4%) | 7 (51.4%) | 109 (23.9%) | 10 (51.3%) | 67 (40.0%) | 84 (16.5%) | 171 (12.8%) | 145 (12.8%) | 150 (16.0%) | 77 (18.7%) | 142 (71.2%) | 640 (68.2%) | 86 (15.1%) | 292 (36.7%) | 146 (16.8%) |
| Senegal | 16 (21.1%) | 6 (20.9%) | 5 (41.1%) | 3 (14.3%) | 2 (34.1%) | 17 (21.6%) | 34 (9.9%) | 12 (8.7%) | 9 (7.6%) | 65 (9.8%) | 11 (11.5%) | 20 (41.1%) | 75 (42.8%) | 5 (5.4%) | 33 (21.8%) | 8 (9.3%) |
| Serbia | 265 (52.2%) | 25 (52.8%) | 92 (67.8%) | 12 (38.5%) | 113 (69.1%) | 107 (52.9%) | 238 (28.5%) | 375 (23.2%) | 410 (23.7%) | 139 (27.2%) | 221 (30.4%) | 466 (80.1%) | 3786 (81.1%) | 176 (27.6%) | 826 (47.9%) | 178 (33.8%) |
| Sierra Leone | 0 (35.6%) | 0 (0.0%) | 0 (0.0%) | 0 (0.0%) | 0 (0.0%) | 0 (20.1%) | 10 (9.8%) | 0 (5.1%) | 0 (7.7%) | 16 (6.7%) | 0 (15.9%) | 0 (0.0%) | 24 (46.7%) | 0 (0.0%) | 1 (24.1%) | 0 (29.8%) |
| Singapore | 60 (35.7%) | 14 (34.5%) | 29 (50.4%) | 92 (22.1%) | 22 (51.0%) | 70 (34.4%) | 96 (16.3%) | 183 (13.5%) | 126 (13.5%) | 178 (16.3%) | 97 (18.0%) | 106 (64.0%) | 1311 (66.2%) | 86 (15.8%) | 110 (31.5%) | 81 (21.2%) |
| Slovakia | 224 (46.1%) | 12 (46.0%) | 238 (60.5%) | 4 (33.3%) | 152 (60.9%) | 122 (45.1%) | 111 (23.7%) | 278 (20.6%) | 223 (20.7%) | 82 (24.1%) | 128 (24.8%) | 205 (75.3%) | 1391 (75.6%) | 182 (23.7%) | 493 (45.0%) | 132 (34.5%) |
| Slovenia | 50 (46.7%) | 5 (45.5%) | 53 (63.1%) | 1 (41.5%) | 35 (62.4%) | 40 (48.4%) | 66 (23.8%) | 97 (17.7%) | 75 (18.5%) | 56 (23.5%) | 67 (26.0%) | 84 (76.1%) | 804 (77.2%) | 66 (24.4%) | 171 (34.8%) | 65 (30.8%) |
| Solomon Islands | 4 (45.3%) | 1 (41.4%) | 1 (56.1%) | 1 (30.6%) | 0 (0.0%) | 2 (38.1%) | 1 (23.3%) | 0 (19.7%) | 1 (21.7%) | 8 (19.6%) | 1 (24.8%) | 3 (66.2%) | 13 (63.1%) | 0 (0.0%) | 3 (53.1%) | 2 (9.4%) |
| Somalia | 21 (21.8%) | 5 (21.9%) | 6 (37.3%) | 12 (10.8%) | 3 (31.7%) | 47 (27.8%) | 17 (9.1%) | 17 (8.3%) | 11 (7.5%) | 16 (9.5%) | 8 (11.6%) | 36 (45.9%) | 62 (42.5%) | 6 (5.5%) | 31 (27.1%) | 23 (7.6%) |
| South Africa | 417 (39.5%) | 61 (35.3%) | 185 (51.6%) | 17 (16.4%) | 70 (53.0%) | 728 (38.1%) | 179 (15.4%) | 250 (13.2%) | 216 (12.4%) | 203 (13.8%) | 236 (18.0%) | 497 (60.9%) | 3830 (63.3%) | 110 (13.3%) | 529 (32.6%) | 181 (17.8%) |
| South Sudan | 14 (21.7%) | 5 (23.7%) | 5 (35.1%) | 8 (11.9%) | 3 (38.5%) | 51 (27.8%) | 11 (9.0%) | 8 (7.5%) | 6 (6.9%) | 18 (8.2%) | 6 (11.4%) | 24 (45.9%) | 30 (41.4%) | 4 (5.4%) | 19 (26.6%) | 5 (9.2%) |
| Spain | 1343 (52.2%) | 139 (48.7%) | 602 (68.2%) | 126 (38.7%) | 407 (68.0%) | 921 (50.7%) | 1213 (28.5%) | 3456 (22.6%) | 1927 (23.3%) | 1268 (28.1%) | 1338 (30.7%) | 2060 (77.7%) | 17531 (81.0%) | 1702 (28.6%) | 7366 (43.3%) | 1249 (36.4%) |
| Sri Lanka | 726 (36.5%) | 38 (32.4%) | 222 (51.9%) | 12 (22.3%) | 182 (52.2%) | 443 (39.6%) | 92 (16.4%) | 75 (15.7%) | 90 (15.5%) | 53 (18.7%) | 30 (18.6%) | 411 (59.4%) | 994 (59.7%) | 42 (15.9%) | 218 (40.3%) | 125 (20.6%) |
| Sudan | 148 (44.2%) | 31 (50.5%) | 12 (61.6%) | 93 (28.7%) | 23 (55.1%) | 206 (48.8%) | 78 (22.9%) | 67 (14.6%) | 52 (14.1%) | 186 (23.2%) | 43 (28.4%) | 208 (77.0%) | 293 (72.0%) | 50 (16.4%) | 203 (50.2%) | 174 (26.2%) |
| Suriname | 3 (43.7%) | 0 (0.0%) | 1 (51.5%) | 2 (31.9%) | 0 (0.0%) | 1 (43.2%) | 4 (21.2%) | 9 (19.5%) | 2 (17.8%) | 5 (18.9%) | 3 (22.4%) | 4 (65.6%) | 51 (69.2%) | 1 (18.0%) | 4 (34.0%) | 4 (20.7%) |
| Sweden | 146 (33.3%) | 19 (30.3%) | 88 (48.1%) | 4 (21.9%) | 28 (51.3%) | 176 (38.8%) | 96 (18.2%) | 366 (14.6%) | 221 (14.9%) | 128 (19.1%) | 220 (19.3%) | 94 (70.6%) | 1345 (68.0%) | 201 (17.6%) | 844 (33.0%) | 248 (25.8%) |
| Switzerland | 221 (43.8%) | 35 (44.0%) | 141 (59.6%) | 9 (29.1%) | 84 (59.4%) | 229 (47.4%) | 147 (22.5%) | 314 (17.7%) | 187 (18.1%) | 176 (22.7%) | 231 (24.6%) | 143 (76.7%) | 2099 (75.1%) | 169 (22.2%) | 1070 (43.8%) | 241 (31.2%) |
| Syrian Arab Republic | 52 (50.3%) | 20 (45.9%) | 7 (67.1%) | 26 (31.2%) | 3 (63.2%) | 30 (50.7%) | 110 (25.0%) | 107 (20.8%) | 33 (18.6%) | 51 (24.1%) | 112 (28.5%) | 260 (78.6%) | 1502 (75.6%) | 69 (23.7%) | 292 (49.4%) | 201 (27.1%) |
| Tajikistan | 16 (36.7%) | 1 (43.8%) | 8 (56.5%) | 1 (17.5%) | 4 (57.1%) | 31 (41.8%) | 137 (19.6%) | 12 (12.0%) | 13 (12.0%) | 24 (16.0%) | 7 (18.0%) | 8 (75.2%) | 146 (66.7%) | 14 (14.5%) | 18 (35.3%) | 13 (15.0%) |
| Tanzania, United Republic of | 137 (32.1%) | 34 (24.8%) | 33 (44.7%) | 35 (18.5%) | 83 (49.5%) | 824 (33.2%) | 114 (14.2%) | 51 (10.3%) | 31 (12.5%) | 83 (12.1%) | 48 (15.2%) | 118 (52.8%) | 176 (43.1%) | 20 (5.4%) | 195 (31.4%) | 50 (12.3%) |
| Thailand | 1154 (47.0%) | 127 (44.7%) | 525 (60.2%) | 513 (30.4%) | 460 (62.2%) | 1308 (47.7%) | 507 (22.9%) | 1150 (20.9%) | 946 (20.8%) | 4379 (22.9%) | 518 (25.6%) | 1123 (73.7%) | 11129 (73.2%) | 304 (22.9%) | 1593 (49.0%) | 645 (28.0%) |
| The Netherlands | 381 (44.2%) | 46 (42.6%) | 182 (60.6%) | 16 (28.5%) | 108 (60.7%) | 915 (44.9%) | 262 (23.8%) | 1282 (19.8%) | 690 (20.0%) | 233 (24.5%) | 451 (25.5%) | 395 (74.7%) | 5868 (75.3%) | 454 (23.6%) | 2369 (41.1%) | 658 (33.7%) |
| The Republic of the Gambia | 1 (25.7%) | 0 (0.0%) | 0 (0.0%) | 0 (0.0%) | 0 (0.0%) | 4 (25.2%) | 2 (11.3%) | 0 (9.4%) | 1 (9.0%) | 17 (8.0%) | 1 (15.7%) | 3 (51.6%) | 26 (52.7%) | 0 (0.0%) | 4 (27.5%) | 0 (2.6%) |
| Timor-Leste | 2 (56.4%) | 1 (21.2%) | 0 (0.0%) | 11 (32.2%) | 0 (0.0%) | 2 (53.4%) | 4 (22.7%) | 5 (20.0%) | 4 (19.9%) | 9 (22.5%) | 2 (27.1%) | 4 (74.2%) | 45 (71.9%) | 2 (21.5%) | 6 (49.8%) | 3 (14.0%) |
| Togo | 8 (22.9%) | 11 (23.8%) | 12 (43.3%) | 3 (13.9%) | 1 (45.2%) | 24 (27.1%) | 17 (11.1%) | 12 (9.1%) | 5 (9.0%) | 11 (8.8%) | 5 (13.1%) | 29 (55.6%) | 30 (47.7%) | 4 (8.0%) | 11 (29.2%) | 8 (9.9%) |
| Trinidad and Tobago | 8 (37.1%) | 1 (37.9%) | 6 (51.9%) | 1 (24.6%) | 4 (56.3%) | 9 (35.1%) | 10 (17.0%) | 21 (15.3%) | 11 (14.9%) | 7 (18.9%) | 12 (18.5%) | 17 (58.7%) | 125 (62.6%) | 8 (15.3%) | 22 (34.3%) | 10 (20.6%) |
| Tunisia | 96 (53.9%) | 11 (53.1%) | 19 (68.1%) | 103 (34.6%) | 14 (67.9%) | 30 (57.1%) | 93 (28.0%) | 112 (22.3%) | 87 (22.4%) | 92 (26.8%) | 97 (31.3%) | 380 (84.1%) | 2216 (80.8%) | 47 (25.9%) | 698 (56.6%) | 124 (30.1%) |
| Turkmenistan | 49 (44.3%) | 3 (47.9%) | 19 (59.2%) | 6 (23.7%) | 18 (58.9%) | 90 (43.4%) | 93 (22.5%) | 9 (16.3%) | 14 (16.2%) | 37 (19.8%) | 19 (24.0%) | 41 (72.5%) | 277 (74.4%) | 25 (19.3%) | 45 (35.7%) | 24 (20.8%) |
| T�rkiye | 774 (53.2%) | 160 (50.1%) | 127 (68.4%) | 213 (36.2%) | 109 (67.2%) | 392 (54.0%) | 2410 (29.7%) | 1647 (23.7%) | 1099 (23.9%) | 925 (28.5%) | 1608 (32.0%) | 3028 (81.7%) | 26847 (81.3%) | 960 (28.1%) | 5535 (49.6%) | 1065 (29.9%) |
| Uganda | 54 (16.9%) | 8 (14.0%) | 20 (24.7%) | 29 (9.6%) | 20 (32.4%) | 328 (22.1%) | 20 (6.7%) | 25 (5.8%) | 15 (5.6%) | 64 (5.7%) | 8 (7.7%) | 75 (34.9%) | 86 (29.5%) | 5 (2.0%) | 37 (19.8%) | 24 (5.0%) |
| Ukraine | 1504 (56.9%) | 155 (55.5%) | 858 (69.9%) | 59 (38.6%) | 827 (70.4%) | 1211 (53.8%) | 1496 (30.8%) | 1352 (25.5%) | 1275 (25.7%) | 372 (28.8%) | 970 (32.6%) | 1990 (80.3%) | 11223 (82.2%) | 1004 (29.2%) | 2200 (49.5%) | 720 (38.5%) |
| United Arab Emirates | 22 (34.9%) | 3 (31.3%) | 4 (51.5%) | 6 (23.3%) | 1 (52.0%) | 8 (33.2%) | 17 (15.7%) | 30 (14.0%) | 17 (13.7%) | 9 (16.2%) | 9 (17.4%) | 30 (62.4%) | 117 (63.8%) | 13 (15.9%) | 62 (32.9%) | 39 (22.3%) |
| United Kingdom | 1725 (43.3%) | 170 (39.5%) | 1339 (59.7%) | 61 (30.5%) | 367 (59.4%) | 2811 (43.2%) | 880 (22.7%) | 2961 (18.1%) | 1808 (18.7%) | 1182 (24.0%) | 1405 (24.3%) | 1366 (71.8%) | 18908 (73.5%) | 2029 (23.3%) | 6253 (35.6%) | 2078 (31.9%) |
| United States of America | 8018 (42.4%) | 1176 (39.8%) | 6887 (58.2%) | 441 (31.0%) | 1077 (58.6%) | 7044 (47.7%) | 3356 (21.8%) | 8860 (16.5%) | 4607 (16.9%) | 7095 (22.9%) | 7704 (24.4%) | 7262 (74.7%) | 84594 (75.3%) | 10087 (21.7%) | 21500 (34.9%) | 11115 (29.7%) |
| Uruguay | 55 (45.9%) | 8 (42.6%) | 32 (62.1%) | 5 (34.2%) | 17 (61.1%) | 79 (40.7%) | 82 (22.6%) | 130 (19.2%) | 63 (19.7%) | 33 (24.0%) | 87 (24.1%) | 108 (70.2%) | 893 (73.2%) | 122 (23.7%) | 161 (35.2%) | 46 (28.7%) |
| Uzbekistan | 308 (40.2%) | 23 (36.8%) | 59 (50.4%) | 27 (17.8%) | 43 (51.6%) | 263 (37.4%) | 350 (18.5%) | 89 (15.5%) | 111 (15.2%) | 176 (17.8%) | 118 (19.5%) | 71 (63.2%) | 1258 (67.8%) | 76 (15.5%) | 243 (37.8%) | 103 (14.6%) |
| Vanuatu | 1 (31.0%) | 0 (0.0%) | 0 (0.0%) | 0 (0.0%) | 0 (0.0%) | 0 (0.0%) | 1 (14.3%) | 0 (13.4%) | 1 (14.1%) | 3 (14.8%) | 0 (16.9%) | 1 (48.6%) | 6 (52.9%) | 0 (0.0%) | 1 (38.0%) | 0 (11.1%) |
| Venezuela | 125 (30.4%) | 24 (29.3%) | 137 (45.9%) | 15 (17.5%) | 27 (47.9%) | 110 (31.3%) | 239 (13.1%) | 273 (12.4%) | 130 (12.0%) | 109 (14.5%) | 107 (14.9%) | 382 (54.0%) | 1740 (54.7%) | 183 (12.8%) | 254 (30.8%) | 158 (15.3%) |
| Viet Nam | 951 (50.1%) | 115 (45.9%) | 377 (64.3%) | 1333 (33.3%) | 1270 (64.9%) | 1721 (52.2%) | 2465 (24.5%) | 944 (21.5%) | 1046 (21.9%) | 4586 (24.2%) | 213 (26.9%) | 1453 (77.3%) | 12635 (74.3%) | 228 (21.1%) | 841 (52.6%) | 668 (22.6%) |
| Yemen | 55 (47.0%) | 24 (33.9%) | 4 (37.0%) | 46 (17.0%) | 3 (63.7%) | 168 (51.0%) | 120 (23.1%) | 68 (15.9%) | 63 (16.2%) | 103 (22.4%) | 39 (23.6%) | 231 (78.8%) | 286 (64.6%) | 8 (7.9%) | 129 (48.6%) | 75 (15.0%) |
| Zambia | 16 (21.0%) | 8 (22.0%) | 7 (35.2%) | 4 (13.4%) | 1 (49.1%) | 89 (27.3%) | 12 (8.8%) | 7 (7.2%) | 9 (7.3%) | 20 (7.6%) | 6 (10.5%) | 30 (42.0%) | 55 (42.4%) | 1 (2.0%) | 41 (26.7%) | 6 (4.5%) |
| Zimbabwe | 24 (39.3%) | 8 (31.7%) | 7 (55.6%) | 6 (20.4%) | 4 (60.8%) | 188 (44.6%) | 60 (20.5%) | 29 (15.8%) | 19 (15.6%) | 56 (15.7%) | 22 (22.7%) | 60 (73.7%) | 175 (68.7%) | 11 (13.7%) | 40 (44.2%) | 20 (13.9%) |

## Alcohol consumption

**Table 5.3.1.** Proportion and number of cancer cases attributable to alcohol consumption, women and men

| **Country** | **Women** | | | **Men** | | |
| --- | --- | --- | --- | --- | --- | --- |
| **N** | **PAF alcohol** | **PAF all** | **N** | **PAF alcohol** | **PAF all** |
| Afghanistan | 6 | 0.1% | 0% | 40 | 1.5% | 0.0% |
| Albania | 54 | 3.9% | 0% | 135 | 19.2% | 0.4% |
| Algeria | 35 | 0.2% | 0% | 95 | 1.6% | 0.0% |
| Angola | 288 | 6.6% | 0% | 822 | 33.0% | 1.0% |
| Argentina | 1684 | 5.4% | 0% | 2636 | 19.1% | 0.5% |
| Armenia | 52 | 2.8% | 0% | 156 | 14.9% | 0.4% |
| Australia | 2416 | 7.5% | 0% | 3868 | 24.5% | 0.6% |
| Austria | 628 | 7.3% | 0% | 1200 | 24.9% | 0.6% |
| Azerbaijan | 65 | 1.6% | 0% | 229 | 10.8% | 0.3% |
| Bahamas | 4 | 1.9% | 0% | 9 | 9.4% | 0.2% |
| Bahrain | 2 | 0.6% | 0% | 5 | 3.4% | 0.1% |
| Bangladesh | 70 | 0.2% | 0% | 985 | 2.0% | 0.1% |
| Barbados | 8 | 3.6% | 0% | 20 | 16.8% | 0.4% |
| Belarus | 883 | 10.2% | 0% | 2055 | 33.0% | 1.1% |
| Belgium | 1115 | 6.9% | 0% | 1833 | 23.9% | 0.6% |
| Belize | 3 | 3.3% | 0% | 6 | 17.4% | 0.4% |
| Benin | 29 | 1.5% | 0% | 84 | 9.4% | 0.3% |
| Bhutan | 2 | 2.9% | 0% | 14 | 11.6% | 0.5% |
| Bolivia | 81 | 3.1% | 0% | 177 | 16.3% | 0.3% |
| Bosnia Herzegovina | 87 | 3.3% | 0% | 313 | 16.9% | 0.5% |
| Botswana | 19 | 5.1% | 0% | 81 | 32.2% | 1.1% |
| Brazil | 6388 | 4.7% | 0% | 16204 | 24.0% | 0.7% |
| Brunei Darussalam | 1 | 0.3% | 0% | 1 | 0.7% | 0.0% |
| Bulgaria | 399 | 6.5% | 0% | 1030 | 23.4% | 0.8% |
| Burkina Faso | 132 | 4.9% | 0% | 405 | 25.0% | 0.9% |
| Burundi | 73 | 5.3% | 0% | 235 | 29.4% | 0.9% |
| Cambodia | 140 | 3.1% | 0% | 796 | 19.7% | 1.1% |
| Cameroon | 218 | 4.3% | 0% | 451 | 26.4% | 0.7% |
| Canada | 2671 | 5.8% | 0% | 4717 | 20.8% | 0.5% |
| Cape Verde | 4 | 4.3% | 0% | 17 | 30.5% | 1.0% |
| Central African Republic | 15 | 2.0% | 0% | 36 | 15.0% | 0.4% |
| Chad | 60 | 3.4% | 0% | 232 | 19.0% | 0.5% |
| Chile | 565 | 5.5% | 0% | 1179 | 22.3% | 0.5% |
| China | 34398 | 4.7% | 0% | 199025 | 24.7% | 1.0% |
| Colombia | 574 | 2.3% | 0% | 1051 | 11.7% | 0.2% |
| Comoros | 0 | 0.2% | 0% | 1 | 2.2% | 0.1% |
| Congo, Democratic Republic of | 173 | 1.7% | 0% | 597 | 12.1% | 0.3% |
| Congo, Republic of | 24 | 3.4% | 0% | 37 | 12.8% | 0.4% |
| Costa Rica | 44 | 2.0% | 0% | 105 | 11.0% | 0.2% |
| Croatia | 310 | 6.1% | 0% | 840 | 22.6% | 0.7% |
| Cuba | 211 | 2.3% | 0% | 947 | 14.4% | 0.5% |
| Cyprus | 80 | 6.0% | 0% | 98 | 19.9% | 0.4% |
| Czechia | 957 | 8.1% | 0% | 1778 | 25.3% | 0.7% |
| C�te d'Ivoire | 195 | 4.0% | 0% | 407 | 23.5% | 0.5% |
| Denmark | 549 | 6.1% | 0% | 1141 | 20.6% | 0.6% |
| Djibouti | 1 | 0.3% | 0% | 3 | 3.9% | 0.1% |
| Dominican Republic | 155 | 3.2% | 0% | 317 | 16.0% | 0.4% |
| Ecuador | 179 | 3.0% | 0% | 289 | 13.7% | 0.3% |
| Egypt | 62 | 0.1% | 0% | 463 | 1.9% | 0.1% |
| El Salvador | 36 | 1.5% | 0% | 52 | 8.0% | 0.2% |
| Equatorial Guinea | 12 | 5.7% | 0% | 33 | 27.9% | 1.0% |
| Eritrea | 4 | 0.6% | 0% | 10 | 4.7% | 0.1% |
| Estonia | 102 | 6.7% | 0% | 225 | 25.8% | 0.7% |
| Eswatini | 5 | 3.6% | 0% | 11 | 24.2% | 0.4% |
| Ethiopia | 368 | 1.6% | 0% | 749 | 11.6% | 0.4% |
| Fiji | 5 | 1.4% | 0% | 16 | 10.9% | 0.3% |
| Finland | 586 | 7.5% | 0% | 777 | 23.2% | 0.5% |
| France (metropolitan) | 7093 | 7.3% | 0% | 13470 | 26.2% | 0.7% |
| France, Guadeloupe | 14 | 3.8% | 0% | 48 | 21.8% | 0.5% |
| France, La R�union | 13 | 2.2% | 0% | 75 | 16.5% | 0.5% |
| France, Martinique | 16 | 3.9% | 0% | 36 | 19.9% | 0.4% |
| French Guyana | 4 | 3.8% | 0% | 11 | 19.6% | 0.4% |
| French Polynesia | 1 | 0.7% | 0% | 7 | 7.1% | 0.2% |
| Gabon | 31 | 6.9% | 0% | 75 | 31.2% | 1.3% |
| Gaza Strip and West Bank | 9 | 0.8% | 0% | 24 | 4.9% | 0.1% |
| Georgia | 150 | 6.0% | 0% | 384 | 25.1% | 0.7% |
| Germany | 8240 | 7.4% | 0% | 13670 | 24.4% | 0.6% |
| Ghana | 232 | 3.4% | 0% | 811 | 21.9% | 0.9% |
| Greece | 750 | 5.6% | 0% | 1435 | 21.0% | 0.5% |
| Guam | 1 | 0.7% | 0% | 4 | 6.7% | 0.2% |
| Guatemala | 67 | 1.7% | 0% | 145 | 8.8% | 0.2% |
| Guinea | 6 | 0.4% | 0% | 40 | 3.5% | 0.2% |
| Guinea-Bissau | 7 | 2.3% | 0% | 23 | 18.7% | 0.7% |
| Guyana | 7 | 2.6% | 0% | 13 | 15.5% | 0.3% |
| Haiti | 79 | 3.0% | 0% | 184 | 15.8% | 0.3% |
| Honduras | 32 | 1.8% | 0% | 89 | 9.8% | 0.2% |
| Hungary | 865 | 6.8% | 0% | 2309 | 25.1% | 0.9% |
| Iceland | 11 | 3.4% | 0% | 27 | 15.3% | 0.4% |
| India | 8422 | 2.8% | 0% | 58314 | 19.7% | 1.1% |
| Indonesia | 204 | 0.2% | 0% | 999 | 2.0% | 0.1% |
| Iran, Islamic Republic of | 96 | 0.4% | 0% | 363 | 2.3% | 0.1% |
| Iraq | 18 | 0.2% | 0% | 40 | 1.7% | 0.0% |
| Ireland | 403 | 7.3% | 0% | 672 | 22.4% | 0.6% |
| Israel | 91 | 1.4% | 0% | 116 | 5.1% | 0.1% |
| Italy | 3379 | 3.8% | 0% | 7486 | 16.1% | 0.4% |
| Jamaica | 31 | 1.8% | 0% | 61 | 9.1% | 0.2% |
| Japan | 7251 | 4.0% | 0% | 26559 | 18.7% | 0.6% |
| Jordan | 7 | 0.2% | 0% | 22 | 2.1% | 0.0% |
| Kazakhstan | 424 | 5.7% | 0% | 1013 | 24.8% | 0.8% |
| Kenya | 382 | 3.4% | 0% | 941 | 21.7% | 0.7% |
| Korea, Democratic People Republic of | 196 | 1.6% | 0% | 1363 | 13.5% | 0.6% |
| Korea, Republic of | 2253 | 5.5% | 0% | 8039 | 23.5% | 0.8% |
| Kuwait | 0 | 0.0% | 0% | 0 | 0.0% | 0.0% |
| Kyrgyzstan | 62 | 4.6% | 0% | 171 | 21.8% | 0.7% |
| Lao People's Democratic Republic | 82 | 4.2% | 0% | 462 | 24.7% | 1.3% |
| Latvia | 137 | 6.8% | 0% | 295 | 27.0% | 0.6% |
| Lebanon | 21 | 0.8% | 0% | 46 | 5.0% | 0.1% |
| Lesotho | 17 | 5.3% | 0% | 47 | 26.3% | 0.8% |
| Liberia | 28 | 3.1% | 0% | 88 | 20.2% | 0.7% |
| Libya | 0 | 0.0% | 0% | 1 | 0.1% | 0.0% |
| Lithuania | 244 | 9.3% | 0% | 577 | 32.9% | 0.8% |
| Luxembourg | 51 | 6.8% | 0% | 61 | 21.5% | 0.5% |
| Madagascar | 50 | 1.2% | 0% | 228 | 11.0% | 0.3% |
| Malawi | 101 | 3.5% | 0% | 371 | 22.6% | 0.6% |
| Malaysia | 69 | 0.5% | 0% | 242 | 3.4% | 0.1% |
| Maldives | 1 | 0.6% | 0% | 4 | 5.5% | 0.2% |
| Mali | 16 | 0.5% | 0% | 66 | 5.2% | 0.2% |
| Malta | 20 | 3.5% | 0% | 36 | 14.2% | 0.3% |
| Mauritania | 0 | 0.0% | 0% | 1 | 0.3% | 0.0% |
| Mauritius | 14 | 1.8% | 0% | 36 | 9.9% | 0.4% |
| Mexico | 1430 | 3.2% | 0% | 2258 | 14.4% | 0.3% |
| Moldova | 266 | 10.0% | 0% | 829 | 32.5% | 1.4% |
| Mongolia | 109 | 6.2% | 0% | 473 | 25.8% | 1.7% |
| Montenegro | 38 | 6.6% | 0% | 61 | 23.0% | 0.6% |
| Morocco | 59 | 0.4% | 0% | 146 | 2.9% | 0.1% |
| Mozambique | 74 | 1.8% | 0% | 193 | 9.8% | 0.2% |
| Myanmar | 254 | 1.7% | 0% | 1952 | 13.6% | 0.7% |
| Namibia | 41 | 5.7% | 0% | 72 | 28.2% | 0.6% |
| Nepal | 38 | 1.1% | 0% | 211 | 8.8% | 0.3% |
| New Caledonia | 2 | 0.7% | 0% | 8 | 6.3% | 0.2% |
| New Zealand | 405 | 6.7% | 0% | 655 | 20.5% | 0.6% |
| Nicaragua | 40 | 2.1% | 0% | 85 | 11.6% | 0.3% |
| Niger | 3 | 0.1% | 0% | 19 | 1.3% | 0.0% |
| Nigeria | 2279 | 5.9% | 0% | 2125 | 26.0% | 0.6% |
| North Macedonia | 48 | 3.0% | 0% | 125 | 14.7% | 0.4% |
| Norway | 369 | 4.8% | 0% | 639 | 16.5% | 0.4% |
| Oman | 2 | 0.2% | 0% | 7 | 1.3% | 0.0% |
| Pakistan | 58 | 0.1% | 0% | 351 | 1.2% | 0.1% |
| Panama | 59 | 3.5% | 0% | 102 | 15.5% | 0.3% |
| Papua New Guinea | 23 | 0.9% | 0% | 130 | 7.1% | 0.3% |
| Paraguay | 114 | 4.0% | 0% | 306 | 21.0% | 0.6% |
| Peru | 530 | 4.4% | 0% | 747 | 18.3% | 0.3% |
| Philippines | 1710 | 3.6% | 0% | 4494 | 18.4% | 0.7% |
| Poland | 2457 | 6.3% | 0% | 6327 | 24.2% | 0.7% |
| Portugal | 1072 | 7.5% | 0% | 2779 | 26.8% | 1.0% |
| Puerto Rico | 114 | 3.9% | 0% | 315 | 18.1% | 0.5% |
| Qatar | 1 | 0.4% | 0% | 7 | 2.9% | 0.1% |
| Romania | 1790 | 8.9% | 0% | 4905 | 29.9% | 1.1% |
| Russian Federation | 11805 | 8.8% | 0% | 22228 | 30.8% | 1.0% |
| Rwanda | 75 | 6.6% | 0% | 222 | 29.6% | 0.9% |
| Saint Lucia | 4 | 4.7% | 0% | 10 | 22.8% | 0.5% |
| Samoa | 1 | 1.4% | 0% | 4 | 8.3% | 0.2% |
| Sao Tome and Principe | 1 | 5.4% | 0% | 4 | 25.0% | 0.7% |
| Saudi Arabia | 2 | 0.0% | 0% | 13 | 0.3% | 0.0% |
| Senegal | 7 | 0.2% | 0% | 32 | 2.8% | 0.1% |
| Serbia | 505 | 6.6% | 0% | 1224 | 22.5% | 0.7% |
| Sierra Leone | 11 | 3.0% | 0% | 56 | 23.2% | 0.8% |
| Singapore | 63 | 1.1% | 0% | 169 | 4.2% | 0.2% |
| Slovakia | 390 | 6.7% | 0% | 1158 | 26.1% | 0.9% |
| Slovenia | 162 | 6.4% | 0% | 380 | 23.3% | 0.6% |
| Solomon Islands | 1 | 0.6% | 0% | 3 | 5.2% | 0.2% |
| Somalia | 9 | 0.3% | 0% | 21 | 2.3% | 0.1% |
| South Africa | 1294 | 6.0% | 0% | 2753 | 29.3% | 0.7% |
| South Sudan | 54 | 3.3% | 0% | 148 | 20.4% | 0.7% |
| Spain | 3101 | 5.7% | 0% | 7857 | 21.4% | 0.7% |
| Sri Lanka | 202 | 2.7% | 0% | 1035 | 17.5% | 0.8% |
| Sudan | 17 | 0.2% | 0% | 69 | 2.5% | 0.1% |
| Suriname | 7 | 2.7% | 0% | 14 | 14.4% | 0.3% |
| Sweden | 629 | 5.3% | 0% | 1100 | 18.6% | 0.4% |
| Switzerland | 666 | 6.7% | 0% | 1189 | 23.2% | 0.6% |
| Syrian Arab Republic | 14 | 0.3% | 0% | 21 | 1.5% | 0.0% |
| Tajikistan | 13 | 1.1% | 0% | 45 | 8.9% | 0.2% |
| Tanzania, United Republic of | 488 | 6.8% | 0% | 1680 | 35.0% | 1.2% |
| Thailand | 1567 | 3.6% | 0% | 7225 | 19.3% | 1.0% |
| The Netherlands | 1525 | 5.9% | 0% | 2679 | 18.1% | 0.6% |
| The Republic of the Gambia | 3 | 1.8% | 0% | 34 | 12.9% | 0.8% |
| Timor-Leste | 0 | 0.1% | 0% | 1 | 0.7% | 0.0% |
| Togo | 19 | 1.4% | 0% | 48 | 9.1% | 0.3% |
| Trinidad and Tobago | 27 | 3.3% | 0% | 53 | 15.6% | 0.3% |
| Tunisia | 21 | 0.5% | 0% | 75 | 3.8% | 0.1% |
| Turkmenistan | 65 | 4.2% | 0% | 181 | 23.5% | 0.8% |
| T�rkiye | 311 | 0.8% | 0% | 1170 | 5.6% | 0.1% |
| Uganda | 620 | 11.1% | 0% | 1498 | 37.5% | 1.2% |
| Ukraine | 2444 | 8.0% | 0% | 6513 | 30.5% | 1.1% |
| United Arab Emirates | 10 | 0.7% | 0% | 32 | 5.9% | 0.2% |
| United Kingdom | 6597 | 7.3% | 0% | 10116 | 21.9% | 0.6% |
| United States of America | 20020 | 5.3% | 0% | 35667 | 21.1% | 0.5% |
| Uruguay | 190 | 5.5% | 0% | 373 | 22.1% | 0.6% |
| Uzbekistan | 151 | 1.9% | 0% | 540 | 13.2% | 0.4% |
| Vanuatu | 0 | 0.5% | 0% | 1 | 3.6% | 0.1% |
| Venezuela | 517 | 4.2% | 0% | 1143 | 19.5% | 0.5% |
| Viet Nam | 999 | 2.6% | 0% | 7298 | 19.3% | 1.0% |
| Yemen | 7 | 0.1% | 0% | 24 | 1.2% | 0.0% |
| Zambia | 60 | 3.5% | 0% | 223 | 22.6% | 0.4% |
| Zimbabwe | 70 | 2.3% | 0% | 227 | 18.3% | 0.4% |

**Table 5.3.2.** Proportion and number of cancer cases attributable to alcohol consumption, women

| **Country** | **Lip, oral cavity** | **Oropharynx** | **Hypopharynx** | **Oesophagus** | **Colon** | **Rectum** | **Liver and intrahepatic bile ducts** | **Larynx** | **Breast** |
| --- | --- | --- | --- | --- | --- | --- | --- | --- | --- |
| **N (PAF)** | **N (PAF)** | **N (PAF)** | **N (PAF)** | **N (PAF)** | **N (PAF)** | **N (PAF)** | **N (PAF)** | **N (PAF)** |
| Afghanistan | 1 (0.2%) | 0 (0.2%) | 0 (0.2%) | 2 (0.4%) | 0 (0.0%) | 0 (0.0%) | 0 (0.1%) | 0 (0.1%) | 2 (0.1%) |
| Albania | 2 (7.0%) | 0 (5.7%) | 0 (4.5%) | 2 (10.8%) | 2 (2.2%) | 2 (2.5%) | 3 (4.0%) | 1 (4.1%) | 40 (3.9%) |
| Algeria | 1 (0.5%) | 0 (0.4%) | 0 (0.4%) | 1 (1.0%) | 2 (0.1%) | 1 (0.1%) | 0 (0.1%) | 0 (0.2%) | 29 (0.2%) |
| Angola | 34 (11.6%) | 6 (10.3%) | 0 (0.0%) | 57 (21.8%) | 9 (3.8%) | 5 (3.6%) | 38 (9.0%) | 4 (6.0%) | 134 (4.6%) |
| Argentina | 50 (11.3%) | 11 (9.8%) | 1 (10.0%) | 133 (18.7%) | 174 (3.0%) | 41 (3.1%) | 39 (4.1%) | 13 (6.8%) | 1222 (5.6%) |
| Armenia | 1 (7.1%) | 0 (0.0%) | 0 (0.0%) | 2 (11.6%) | 6 (1.3%) | 2 (1.4%) | 7 (3.2%) | 1 (3.7%) | 33 (3.3%) |
| Australia | 147 (15.7%) | 24 (14.7%) | 6 (14.0%) | 98 (20.9%) | 261 (4.5%) | 97 (4.9%) | 67 (7.7%) | 5 (9.4%) | 1711 (7.8%) |
| Austria | 33 (15.8%) | 13 (14.2%) | 4 (14.6%) | 22 (20.8%) | 56 (4.4%) | 25 (4.7%) | 18 (6.1%) | 5 (9.7%) | 454 (7.6%) |
| Azerbaijan | 2 (2.6%) | 0 (2.7%) | 0 (2.6%) | 24 (4.9%) | 4 (0.7%) | 2 (0.7%) | 5 (1.3%) | 1 (1.6%) | 27 (1.2%) |
| Bahamas | 0 (0.0%) | 0 (0.0%) | 0 (0.0%) | 0 (0.0%) | 0 (0.7%) | 0 (0.7%) | 0 (2.3%) | 0 (0.0%) | 4 (2.2%) |
| Bahrain | 0 (1.5%) | 0 (0.0%) | 0 (0.0%) | 0 (3.1%) | 0 (0.1%) | 0 (0.1%) | 0 (0.4%) | 0 (0.0%) | 2 (0.7%) |
| Bangladesh | 10 (0.2%) | 1 (0.2%) | 2 (0.2%) | 45 (0.5%) | 0 (0.0%) | 0 (0.0%) | 1 (0.1%) | 1 (0.1%) | 10 (0.1%) |
| Barbados | 0 (5.6%) | 0 (0.0%) | 0 (0.0%) | 0 (0.0%) | 1 (2.5%) | 0 (2.4%) | 0 (2.9%) | 0 (0.0%) | 6 (4.2%) |
| Belarus | 33 (21.3%) | 7 (20.2%) | 2 (19.5%) | 17 (30.7%) | 152 (7.8%) | 81 (7.7%) | 19 (9.9%) | 4 (13.6%) | 567 (10.9%) |
| Belgium | 56 (14.8%) | 19 (13.4%) | 7 (13.5%) | 61 (20.2%) | 105 (3.9%) | 33 (4.1%) | 30 (7.1%) | 6 (9.1%) | 797 (7.1%) |
| Belize | 0 (0.0%) | 0 (0.0%) | 0 (0.0%) | 0 (0.0%) | 0 (2.2%) | 0 (0.0%) | 0 (2.8%) | 0 (0.0%) | 3 (3.5%) |
| Benin | 1 (2.5%) | 0 (2.8%) | 0 (2.2%) | 7 (6.8%) | 0 (0.3%) | 0 (0.3%) | 4 (2.2%) | 0 (0.9%) | 14 (1.1%) |
| Bhutan | 0 (2.9%) | 0 (1.8%) | 0 (2.5%) | 1 (6.9%) | 0 (0.3%) | 0 (0.2%) | 0 (1.2%) | 0 (1.4%) | 0 (1.1%) |
| Bolivia | 2 (6.4%) | 2 (7.1%) | 0 (0.0%) | 6 (13.9%) | 4 (1.5%) | 1 (1.5%) | 16 (3.2%) | 2 (5.0%) | 48 (2.9%) |
| Bosnia Herzegovina | 2 (7.2%) | 1 (6.8%) | 0 (6.4%) | 3 (13.0%) | 9 (2.0%) | 7 (2.1%) | 8 (3.5%) | 1 (4.1%) | 56 (3.6%) |
| Botswana | 1 (8.6%) | 0 (7.6%) | 0 (0.0%) | 7 (15.8%) | 1 (2.8%) | 0 (3.1%) | 1 (4.5%) | 0 (5.5%) | 9 (3.6%) |
| Brazil | 250 (9.1%) | 71 (8.0%) | 13 (8.5%) | 390 (18.0%) | 499 (2.9%) | 328 (3.0%) | 232 (4.1%) | 96 (5.8%) | 4509 (4.8%) |
| Brunei Darussalam | 0 (0.9%) | 0 (0.0%) | 0 (0.0%) | 0 (0.0%) | 0 (0.0%) | 0 (0.0%) | 0 (0.6%) | 0 (0.0%) | 1 (0.4%) |
| Bulgaria | 18 (14.6%) | 3 (12.6%) | 1 (13.1%) | 9 (21.8%) | 60 (4.3%) | 31 (4.5%) | 25 (8.9%) | 4 (9.1%) | 248 (7.0%) |
| Burkina Faso | 6 (7.4%) | 0 (0.0%) | 1 (5.3%) | 21 (13.0%) | 5 (2.9%) | 1 (3.0%) | 56 (6.8%) | 1 (3.5%) | 40 (2.9%) |
| Burundi | 2 (6.5%) | 0 (7.6%) | 0 (7.8%) | 27 (15.6%) | 2 (2.8%) | 2 (2.5%) | 10 (6.9%) | 1 (4.1%) | 29 (3.4%) |
| Cambodia | 16 (5.8%) | 1 (4.3%) | 1 (5.6%) | 12 (11.4%) | 9 (1.6%) | 6 (1.7%) | 39 (3.5%) | 0 (2.7%) | 57 (2.7%) |
| Cameroon | 10 (11.3%) | 3 (10.1%) | 1 (10.1%) | 15 (18.3%) | 7 (3.1%) | 5 (3.4%) | 22 (9.1%) | 1 (6.5%) | 154 (3.7%) |
| Canada | 145 (12.2%) | 43 (11.2%) | 5 (10.9%) | 117 (13.7%) | 238 (3.4%) | 105 (3.6%) | 96 (5.5%) | 9 (7.3%) | 1913 (6.0%) |
| Cape Verde | 0 (7.3%) | 0 (0.0%) | 0 (0.0%) | 1 (15.0%) | 0 (2.1%) | 0 (2.3%) | 0 (7.9%) | 0 (5.8%) | 2 (3.7%) |
| Central African Republic | 1 (4.7%) | 0 (0.0%) | 0 (0.0%) | 2 (10.2%) | 0 (0.9%) | 0 (0.9%) | 2 (3.3%) | 0 (0.0%) | 10 (1.8%) |
| Chad | 6 (5.1%) | 1 (4.6%) | 1 (5.2%) | 8 (10.9%) | 1 (1.5%) | 0 (1.6%) | 28 (4.1%) | 1 (2.8%) | 14 (1.9%) |
| Chile | 14 (10.6%) | 4 (10.0%) | 2 (10.5%) | 64 (21.1%) | 78 (3.1%) | 25 (3.2%) | 62 (8.4%) | 2 (6.2%) | 314 (5.6%) |
| China | 1074 (8.2%) | 105 (7.2%) | 39 (6.9%) | 9398 (16.6%) | 2294 (2.0%) | 1912 (2.1%) | 5254 (5.3%) | 106 (4.6%) | 14215 (4.0%) |
| Colombia | 24 (4.8%) | 7 (4.7%) | 2 (4.7%) | 29 (8.8%) | 46 (1.2%) | 16 (1.2%) | 29 (2.2%) | 4 (2.8%) | 417 (2.4%) |
| Comoros | 0 (0.0%) | 0 (0.0%) | 0 (0.0%) | 0 (0.5%) | 0 (0.1%) | 0 (0.1%) | 0 (0.2%) | 0 (0.0%) | 0 (0.1%) |
| Congo, Democratic Republic of | 6 (2.9%) | 1 (2.8%) | 1 (3.0%) | 36 (7.4%) | 2 (0.4%) | 2 (0.3%) | 24 (2.3%) | 1 (1.7%) | 100 (1.4%) |
| Congo, Republic of | 1 (8.4%) | 0 (0.0%) | 0 (0.0%) | 1 (17.8%) | 1 (2.2%) | 1 (1.9%) | 2 (2.2%) | 0 (5.0%) | 19 (3.5%) |
| Costa Rica | 2 (4.4%) | 0 (3.3%) | 0 (0.0%) | 1 (7.3%) | 4 (0.9%) | 2 (1.0%) | 3 (1.8%) | 0 (2.6%) | 31 (2.3%) |
| Croatia | 11 (13.6%) | 2 (12.8%) | 2 (13.1%) | 8 (23.0%) | 42 (3.9%) | 24 (4.0%) | 10 (5.6%) | 2 (8.3%) | 210 (6.8%) |
| Cuba | 14 (5.1%) | 3 (4.1%) | 0 (4.9%) | 13 (7.9%) | 20 (0.9%) | 5 (1.0%) | 9 (2.0%) | 9 (3.2%) | 137 (2.7%) |
| Cyprus | 2 (12.1%) | 0 (0.0%) | 0 (0.0%) | 1 (17.5%) | 7 (4.0%) | 2 (3.9%) | 2 (3.7%) | 0 (7.7%) | 67 (6.5%) |
| Czechia | 63 (17.7%) | 28 (15.8%) | 3 (16.4%) | 26 (22.3%) | 111 (5.3%) | 52 (5.5%) | 22 (5.6%) | 5 (10.5%) | 647 (8.4%) |
| C�te d'Ivoire | 9 (8.7%) | 1 (7.7%) | 0 (3.5%) | 6 (16.4%) | 8 (2.8%) | 4 (3.0%) | 32 (7.8%) | 0 (3.4%) | 133 (3.4%) |
| Denmark | 22 (13.9%) | 16 (12.6%) | 2 (12.2%) | 27 (16.7%) | 81 (3.6%) | 27 (3.8%) | 12 (5.1%) | 4 (8.3%) | 358 (6.8%) |
| Djibouti | 0 (0.7%) | 0 (0.0%) | 0 (0.0%) | 0 (1.3%) | 0 (0.2%) | 0 (0.2%) | 0 (0.5%) | 0 (0.0%) | 0 (0.2%) |
| Dominican Republic | 4 (6.4%) | 2 (5.2%) | 1 (6.0%) | 9 (10.2%) | 15 (1.9%) | 2 (2.3%) | 12 (2.9%) | 3 (4.4%) | 108 (3.3%) |
| Ecuador | 8 (6.6%) | 2 (5.5%) | 0 (4.1%) | 4 (9.3%) | 11 (1.2%) | 5 (1.3%) | 22 (3.9%) | 1 (3.6%) | 126 (3.2%) |
| Egypt | 2 (0.2%) | 0 (0.2%) | 0 (0.3%) | 4 (0.6%) | 0 (0.0%) | 0 (0.0%) | 23 (0.2%) | 0 (0.2%) | 32 (0.1%) |
| El Salvador | 2 (3.1%) | 0 (4.0%) | 0 (0.0%) | 2 (6.2%) | 2 (0.6%) | 0 (0.6%) | 3 (1.3%) | 0 (1.5%) | 26 (1.6%) |
| Equatorial Guinea | 1 (14.1%) | 0 (13.6%) | 0 (0.0%) | 1 (29.7%) | 0 (3.8%) | 0 (4.6%) | 2 (10.3%) | 0 (0.0%) | 8 (4.8%) |
| Eritrea | 0 (1.0%) | 0 (0.0%) | 0 (0.0%) | 1 (2.9%) | 0 (0.1%) | 0 (0.1%) | 0 (0.9%) | 0 (0.4%) | 2 (0.4%) |
| Estonia | 5 (15.3%) | 1 (16.0%) | 0 (0.0%) | 4 (25.1%) | 16 (4.5%) | 8 (4.6%) | 3 (4.7%) | 1 (8.8%) | 64 (7.5%) |
| Eswatini | 0 (7.7%) | 0 (0.0%) | 0 (0.0%) | 1 (11.1%) | 0 (2.9%) | 0 (3.4%) | 1 (5.9%) | 0 (0.0%) | 3 (2.9%) |
| Ethiopia | 18 (3.3%) | 1 (2.7%) | 1 (3.2%) | 68 (7.3%) | 17 (1.0%) | 12 (0.9%) | 29 (2.5%) | 2 (1.8%) | 221 (1.3%) |
| Fiji | 1 (3.3%) | 0 (3.1%) | 0 (0.0%) | 0 (5.3%) | 0 (0.6%) | 0 (0.6%) | 0 (1.4%) | 0 (1.9%) | 4 (1.3%) |
| Finland | 32 (14.8%) | 5 (13.9%) | 1 (14.3%) | 23 (21.2%) | 59 (4.5%) | 26 (4.7%) | 15 (6.5%) | 1 (9.3%) | 425 (7.9%) |
| France (metropolitan) | 378 (15.4%) | 140 (14.3%) | 40 (14.2%) | 300 (24.1%) | 687 (4.3%) | 325 (4.4%) | 242 (7.0%) | 44 (9.5%) | 4938 (7.5%) |
| France, Guadeloupe | 0 (7.6%) | 0 (9.0%) | 0 (0.0%) | 0 (0.0%) | 2 (2.4%) | 1 (2.7%) | 0 (3.4%) | 0 (0.0%) | 10 (4.4%) |
| France, La R�union | 1 (4.3%) | 0 (4.3%) | 0 (0.0%) | 1 (13.4%) | 1 (1.3%) | 1 (1.8%) | 1 (2.3%) | 0 (4.0%) | 9 (2.2%) |
| France, Martinique | 0 (10.0%) | 0 (0.0%) | 0 (0.0%) | 0 (0.0%) | 2 (2.3%) | 1 (2.6%) | 1 (4.1%) | 0 (0.0%) | 13 (4.4%) |
| French Guyana | 0 (0.0%) | 0 (0.0%) | 0 (0.0%) | 0 (0.0%) | 0 (2.5%) | 0 (2.6%) | 0 (0.0%) | 0 (0.0%) | 4 (4.2%) |
| French Polynesia | 0 (1.1%) | 0 (0.0%) | 0 (0.0%) | 0 (0.0%) | 0 (0.3%) | 0 (0.2%) | 0 (0.8%) | 0 (0.0%) | 1 (0.7%) |
| Gabon | 2 (13.9%) | 1 (12.9%) | 0 (11.7%) | 3 (28.5%) | 1 (4.8%) | 0 (5.0%) | 6 (10.5%) | 0 (6.4%) | 17 (5.4%) |
| Gaza Strip and West Bank | 0 (1.6%) | 0 (0.0%) | 0 (0.0%) | 0 (3.1%) | 1 (0.6%) | 1 (0.6%) | 1 (0.9%) | 0 (1.1%) | 7 (0.8%) |
| Georgia | 6 (12.0%) | 1 (8.6%) | 0 (7.2%) | 5 (18.4%) | 11 (4.1%) | 10 (4.1%) | 9 (6.3%) | 1 (6.4%) | 108 (6.2%) |
| Germany | 341 (16.1%) | 176 (14.3%) | 36 (14.2%) | 349 (20.7%) | 817 (4.5%) | 444 (4.7%) | 227 (7.0%) | 53 (9.8%) | 5795 (7.8%) |
| Ghana | 4 (7.2%) | 1 (6.6%) | 0 (0.0%) | 33 (12.1%) | 2 (1.5%) | 3 (1.7%) | 55 (5.1%) | 2 (3.6%) | 131 (2.6%) |
| Greece | 29 (11.1%) | 2 (10.8%) | 0 (7.9%) | 9 (19.5%) | 99 (3.4%) | 18 (3.4%) | 35 (6.1%) | 5 (7.4%) | 553 (6.2%) |
| Guam | 0 (1.3%) | 0 (0.0%) | 0 (0.0%) | 0 (0.0%) | 0 (0.3%) | 0 (0.2%) | 0 (1.2%) | 0 (0.0%) | 0 (0.8%) |
| Guatemala | 3 (3.6%) | 1 (2.5%) | 0 (0.0%) | 4 (7.4%) | 3 (0.7%) | 0 (0.7%) | 17 (1.5%) | 0 (2.1%) | 38 (1.7%) |
| Guinea | 0 (0.6%) | 0 (0.7%) | 0 (0.0%) | 0 (0.0%) | 0 (0.0%) | 0 (0.0%) | 3 (0.5%) | 0 (0.4%) | 2 (0.3%) |
| Guinea-Bissau | 0 (4.9%) | 0 (0.0%) | 0 (0.0%) | 0 (7.0%) | 0 (1.1%) | 0 (1.3%) | 3 (3.9%) | 0 (0.0%) | 3 (1.8%) |
| Guyana | 0 (3.1%) | 0 (0.0%) | 0 (6.8%) | 0 (0.0%) | 0 (1.4%) | 0 (1.5%) | 0 (2.9%) | 0 (0.0%) | 6 (2.7%) |
| Haiti | 2 (6.4%) | 2 (4.9%) | 0 (5.9%) | 10 (9.1%) | 9 (1.8%) | 3 (2.3%) | 11 (2.5%) | 2 (3.9%) | 40 (3.0%) |
| Honduras | 1 (2.7%) | 0 (3.5%) | 0 (2.3%) | 3 (7.3%) | 2 (0.9%) | 1 (0.8%) | 3 (1.6%) | 1 (2.6%) | 22 (1.9%) |
| Hungary | 47 (15.0%) | 22 (13.9%) | 12 (13.9%) | 23 (22.5%) | 115 (4.3%) | 56 (4.4%) | 29 (9.2%) | 12 (9.4%) | 549 (7.1%) |
| Iceland | 0 (7.4%) | 0 (0.0%) | 0 (0.0%) | 0 (0.0%) | 1 (1.6%) | 0 (1.8%) | 0 (3.5%) | 0 (5.4%) | 9 (4.3%) |
| India | 1546 (4.3%) | 124 (3.4%) | 238 (3.7%) | 2488 (9.9%) | 141 (1.1%) | 131 (1.1%) | 219 (1.9%) | 99 (2.3%) | 3437 (1.8%) |
| Indonesia | 14 (0.5%) | 2 (0.5%) | 0 (0.5%) | 4 (1.2%) | 2 (0.0%) | 2 (0.0%) | 14 (0.3%) | 1 (0.3%) | 166 (0.2%) |
| Iran, Islamic Republic of | 4 (0.8%) | 0 (0.6%) | 0 (0.7%) | 25 (1.6%) | 10 (0.3%) | 4 (0.3%) | 5 (0.2%) | 2 (0.3%) | 45 (0.3%) |
| Iraq | 1 (0.4%) | 0 (0.4%) | 0 (0.4%) | 1 (0.8%) | 0 (0.1%) | 0 (0.1%) | 1 (0.2%) | 0 (0.2%) | 15 (0.2%) |
| Ireland | 14 (15.6%) | 4 (14.6%) | 1 (12.8%) | 33 (19.8%) | 38 (4.5%) | 22 (4.7%) | 9 (4.0%) | 4 (9.5%) | 278 (7.5%) |
| Israel | 4 (3.1%) | 0 (3.2%) | 0 (2.7%) | 4 (6.3%) | 2 (0.2%) | 1 (0.2%) | 2 (1.4%) | 1 (2.2%) | 78 (1.7%) |
| Italy | 162 (8.1%) | 36 (7.5%) | 8 (7.5%) | 106 (14.3%) | 320 (1.7%) | 111 (1.8%) | 174 (4.6%) | 32 (5.2%) | 2431 (4.2%) |
| Jamaica | 1 (3.6%) | 0 (3.7%) | 0 (3.4%) | 1 (6.4%) | 2 (0.8%) | 1 (0.8%) | 1 (1.6%) | 0 (2.3%) | 25 (1.9%) |
| Japan | 382 (8.4%) | 36 (7.9%) | 32 (7.8%) | 838 (19.6%) | 741 (1.6%) | 301 (1.7%) | 803 (6.3%) | 19 (5.3%) | 4099 (4.5%) |
| Jordan | 0 (0.5%) | 0 (0.3%) | 0 (0.0%) | 0 (1.0%) | 0 (0.1%) | 0 (0.1%) | 0 (0.2%) | 0 (0.3%) | 6 (0.2%) |
| Kazakhstan | 17 (10.4%) | 4 (9.7%) | 3 (11.2%) | 80 (20.5%) | 33 (3.5%) | 27 (3.5%) | 26 (5.3%) | 3 (6.5%) | 233 (5.1%) |
| Kenya | 18 (4.5%) | 1 (3.0%) | 3 (3.8%) | 179 (10.4%) | 11 (1.2%) | 7 (1.4%) | 14 (3.3%) | 1 (2.8%) | 149 (2.1%) |
| Korea, Democratic People Republic of | 4 (3.4%) | 0 (2.9%) | 0 (2.4%) | 20 (7.0%) | 8 (0.5%) | 9 (0.5%) | 45 (2.2%) | 2 (2.0%) | 108 (1.8%) |
| Korea, Republic of | 68 (12.3%) | 9 (11.4%) | 4 (11.0%) | 74 (25.4%) | 243 (3.1%) | 132 (3.2%) | 264 (7.5%) | 5 (7.2%) | 1454 (5.9%) |
| Kuwait | 0 (0.0%) | 0 (0.0%) | 0 (0.0%) | 0 (0.0%) | 0 (0.0%) | 0 (0.0%) | 0 (0.0%) | 0 (0.0%) | 0 (0.0%) |
| Kyrgyzstan | 4 (10.4%) | 0 (7.5%) | 2 (9.3%) | 10 (15.6%) | 3 (3.0%) | 3 (3.2%) | 7 (4.2%) | 1 (5.2%) | 32 (3.8%) |
| Lao People's Democratic Republic | 8 (8.2%) | 1 (5.8%) | 0 (7.7%) | 3 (16.0%) | 6 (2.7%) | 4 (2.8%) | 21 (5.1%) | 0 (4.5%) | 38 (3.7%) |
| Latvia | 5 (13.9%) | 2 (13.6%) | 0 (14.0%) | 10 (25.4%) | 14 (4.2%) | 10 (4.3%) | 4 (5.9%) | 1 (8.7%) | 90 (7.1%) |
| Lebanon | 1 (1.6%) | 0 (1.7%) | 0 (0.0%) | 0 (2.8%) | 1 (0.4%) | 0 (0.3%) | 0 (0.3%) | 0 (1.1%) | 18 (0.8%) |
| Lesotho | 1 (7.8%) | 0 (0.0%) | 0 (0.0%) | 9 (14.3%) | 1 (2.3%) | 0 (2.4%) | 1 (5.6%) | 0 (0.0%) | 5 (2.9%) |
| Liberia | 1 (6.0%) | 0 (6.2%) | 0 (0.0%) | 1 (12.3%) | 1 (1.4%) | 0 (1.4%) | 10 (5.1%) | 0 (3.8%) | 15 (2.4%) |
| Libya | 0 (0.0%) | 0 (0.0%) | 0 (0.1%) | 0 (0.1%) | 0 (0.0%) | 0 (0.0%) | 0 (0.0%) | 0 (0.0%) | 0 (0.0%) |
| Lithuania | 10 (19.8%) | 2 (18.4%) | 1 (18.6%) | 11 (33.7%) | 30 (6.4%) | 16 (6.4%) | 6 (6.4%) | 1 (12.0%) | 167 (9.7%) |
| Luxembourg | 2 (14.4%) | 0 (14.0%) | 0 (13.2%) | 1 (22.2%) | 4 (3.9%) | 2 (4.4%) | 1 (7.3%) | 0 (9.4%) | 40 (7.1%) |
| Madagascar | 2 (1.8%) | 0 (2.2%) | 0 (2.0%) | 12 (5.3%) | 0 (0.2%) | 0 (0.2%) | 7 (1.5%) | 0 (1.1%) | 28 (1.0%) |
| Malawi | 2 (2.8%) | 0 (0.0%) | 0 (0.0%) | 73 (8.3%) | 1 (0.8%) | 1 (0.7%) | 4 (2.3%) | 0 (2.2%) | 20 (1.3%) |
| Malaysia | 5 (1.2%) | 0 (0.9%) | 0 (1.1%) | 4 (3.6%) | 1 (0.0%) | 0 (0.0%) | 6 (0.9%) | 0 (0.8%) | 53 (0.6%) |
| Maldives | 0 (0.0%) | 0 (0.0%) | 0 (0.0%) | 0 (0.0%) | 0 (0.4%) | 0 (0.6%) | 0 (0.6%) | 0 (0.0%) | 1 (0.6%) |
| Mali | 1 (0.8%) | 0 (0.9%) | 0 (1.0%) | 3 (2.2%) | 0 (0.2%) | 0 (0.2%) | 2 (0.7%) | 0 (0.5%) | 8 (0.4%) |
| Malta | 1 (7.3%) | 0 (0.0%) | 0 (0.0%) | 0 (0.0%) | 2 (1.7%) | 1 (1.7%) | 0 (2.5%) | 0 (5.4%) | 15 (4.0%) |
| Mauritania | 0 (0.0%) | 0 (0.1%) | 0 (0.0%) | 0 (0.1%) | 0 (0.0%) | 0 (0.0%) | 0 (0.0%) | 0 (0.0%) | 0 (0.0%) |
| Mauritius | 1 (4.0%) | 0 (2.0%) | 0 (3.4%) | 1 (8.2%) | 1 (0.5%) | 0 (0.6%) | 0 (1.4%) | 0 (2.3%) | 11 (2.0%) |
| Mexico | 54 (7.1%) | 7 (5.5%) | 2 (5.4%) | 45 (12.8%) | 120 (2.0%) | 32 (2.1%) | 123 (2.8%) | 6 (3.8%) | 1040 (3.4%) |
| Moldova | 6 (20.2%) | 1 (17.6%) | 0 (19.8%) | 3 (26.4%) | 35 (7.4%) | 23 (7.8%) | 29 (13.9%) | 1 (13.3%) | 168 (10.3%) |
| Mongolia | 2 (8.4%) | 0 (6.0%) | 0 (6.4%) | 30 (16.3%) | 2 (2.1%) | 1 (2.2%) | 67 (5.5%) | 0 (5.2%) | 8 (3.7%) |
| Montenegro | 2 (11.8%) | 0 (12.3%) | 0 (13.5%) | 1 (21.1%) | 3 (4.2%) | 1 (4.3%) | 2 (5.9%) | 1 (7.8%) | 28 (6.7%) |
| Morocco | 2 (0.7%) | 0 (0.7%) | 0 (0.7%) | 3 (1.5%) | 4 (0.2%) | 3 (0.3%) | 2 (0.3%) | 0 (0.4%) | 45 (0.4%) |
| Mozambique | 1 (1.4%) | 0 (1.9%) | 0 (1.4%) | 47 (4.9%) | 0 (0.2%) | 0 (0.1%) | 9 (1.2%) | 0 (1.1%) | 16 (0.8%) |
| Myanmar | 26 (3.1%) | 2 (2.7%) | 3 (2.8%) | 67 (6.5%) | 6 (0.4%) | 5 (0.4%) | 38 (1.8%) | 2 (1.5%) | 105 (1.4%) |
| Namibia | 5 (12.3%) | 1 (11.5%) | 0 (0.0%) | 3 (20.1%) | 2 (4.7%) | 1 (4.6%) | 2 (6.2%) | 0 (7.4%) | 27 (4.9%) |
| Nepal | 7 (2.5%) | 0 (1.8%) | 1 (2.1%) | 6 (6.1%) | 1 (0.3%) | 1 (0.3%) | 1 (0.9%) | 2 (1.5%) | 20 (0.9%) |
| New Caledonia | 0 (1.5%) | 0 (0.0%) | 0 (0.0%) | 0 (0.0%) | 0 (0.3%) | 0 (0.2%) | 0 (0.9%) | 0 (0.0%) | 1 (0.8%) |
| New Zealand | 17 (14.7%) | 2 (13.9%) | 1 (11.4%) | 22 (17.2%) | 51 (4.0%) | 23 (4.4%) | 10 (6.6%) | 2 (8.6%) | 278 (7.2%) |
| Nicaragua | 1 (4.9%) | 0 (0.0%) | 0 (5.8%) | 1 (9.0%) | 3 (1.2%) | 1 (1.4%) | 6 (2.0%) | 1 (2.5%) | 28 (2.3%) |
| Niger | 0 (0.2%) | 0 (0.1%) | 0 (0.2%) | 0 (0.0%) | 0 (0.0%) | 0 (0.0%) | 1 (0.2%) | 0 (0.1%) | 2 (0.1%) |
| Nigeria | 82 (13.3%) | 12 (12.0%) | 5 (11.9%) | 57 (23.6%) | 79 (4.7%) | 74 (4.9%) | 191 (10.2%) | 12 (7.2%) | 1769 (5.5%) |
| North Macedonia | 1 (5.8%) | 0 (3.3%) | 0 (5.9%) | 1 (11.0%) | 3 (1.6%) | 3 (1.8%) | 3 (3.3%) | 0 (4.1%) | 36 (3.3%) |
| Norway | 23 (10.8%) | 4 (10.3%) | 0 (10.0%) | 12 (13.2%) | 54 (2.5%) | 16 (2.7%) | 7 (3.9%) | 2 (6.9%) | 251 (5.6%) |
| Oman | 0 (0.6%) | 0 (0.0%) | 0 (0.0%) | 0 (1.4%) | 0 (0.0%) | 0 (0.0%) | 0 (0.3%) | 0 (0.4%) | 1 (0.2%) |
| Pakistan | 9 (0.2%) | 0 (0.1%) | 1 (0.2%) | 19 (0.4%) | 1 (0.0%) | 0 (0.0%) | 3 (0.1%) | 1 (0.1%) | 25 (0.1%) |
| Panama | 2 (8.0%) | 0 (4.2%) | 0 (0.0%) | 2 (13.8%) | 8 (2.3%) | 2 (2.4%) | 4 (3.1%) | 0 (4.3%) | 41 (3.8%) |
| Papua New Guinea | 7 (1.6%) | 0 (1.5%) | 0 (1.6%) | 3 (3.8%) | 0 (0.2%) | 0 (0.2%) | 2 (0.8%) | 0 (1.0%) | 10 (0.6%) |
| Paraguay | 1 (5.6%) | 1 (7.1%) | 0 (0.0%) | 5 (15.8%) | 14 (2.7%) | 3 (2.9%) | 4 (4.1%) | 1 (5.0%) | 86 (4.1%) |
| Peru | 37 (9.6%) | 4 (8.9%) | 4 (9.6%) | 18 (18.1%) | 49 (2.3%) | 11 (2.5%) | 56 (4.9%) | 4 (6.2%) | 347 (4.5%) |
| Philippines | 64 (7.6%) | 10 (6.7%) | 3 (6.3%) | 26 (7.7%) | 141 (2.2%) | 67 (2.3%) | 187 (5.0%) | 10 (4.5%) | 1201 (3.6%) |
| Poland | 166 (13.3%) | 47 (12.6%) | 17 (12.5%) | 107 (24.3%) | 271 (3.8%) | 158 (4.0%) | 74 (6.8%) | 36 (8.5%) | 1582 (6.5%) |
| Portugal | 56 (15.6%) | 6 (14.9%) | 4 (16.0%) | 23 (25.0%) | 155 (5.2%) | 73 (5.3%) | 19 (3.9%) | 4 (10.0%) | 732 (8.2%) |
| Puerto Rico | 4 (7.9%) | 0 (7.4%) | 0 (6.3%) | 3 (12.1%) | 14 (2.3%) | 5 (2.6%) | 5 (3.7%) | 0 (5.0%) | 81 (4.3%) |
| Qatar | 0 (0.9%) | 0 (0.0%) | 0 (0.0%) | 0 (0.0%) | 0 (0.1%) | 0 (0.1%) | 0 (0.7%) | 0 (0.0%) | 1 (0.4%) |
| Romania | 57 (17.7%) | 34 (16.8%) | 7 (17.0%) | 37 (27.1%) | 203 (6.0%) | 124 (6.2%) | 162 (12.3%) | 14 (11.4%) | 1152 (9.1%) |
| Russian Federation | 586 (18.7%) | 134 (17.5%) | 59 (17.5%) | 604 (27.0%) | 1863 (6.2%) | 889 (6.5%) | 628 (13.0%) | 72 (11.3%) | 6969 (8.8%) |
| Rwanda | 3 (11.1%) | 0 (11.6%) | 0 (0.0%) | 11 (20.5%) | 3 (4.7%) | 3 (4.6%) | 12 (10.6%) | 0 (6.7%) | 42 (5.2%) |
| Saint Lucia | 0 (14.2%) | 0 (12.1%) | 0 (0.0%) | 0 (0.0%) | 0 (3.6%) | 0 (4.4%) | 0 (0.0%) | 0 (0.0%) | 3 (4.7%) |
| Samoa | 0 (0.0%) | 0 (0.0%) | 0 (0.0%) | 0 (0.0%) | 0 (0.7%) | 0 (1.0%) | 0 (3.1%) | 0 (0.0%) | 1 (1.5%) |
| Sao Tome and Principe | 0 (0.0%) | 0 (0.0%) | 0 (0.0%) | 0 (0.0%) | 0 (3.4%) | 0 (0.0%) | 0 (10.1%) | 0 (0.0%) | 1 (5.4%) |
| Saudi Arabia | 0 (0.1%) | 0 (0.1%) | 0 (0.1%) | 0 (0.2%) | 0 (0.0%) | 0 (0.0%) | 0 (0.0%) | 0 (0.1%) | 2 (0.0%) |
| Senegal | 0 (0.4%) | 0 (0.5%) | 0 (0.0%) | 1 (1.1%) | 0 (0.0%) | 0 (0.0%) | 2 (0.4%) | 0 (0.3%) | 3 (0.2%) |
| Serbia | 29 (14.5%) | 3 (12.0%) | 3 (13.2%) | 11 (22.4%) | 53 (4.7%) | 42 (4.7%) | 17 (5.2%) | 5 (8.4%) | 343 (7.0%) |
| Sierra Leone | 0 (4.9%) | 0 (0.0%) | 0 (0.0%) | 0 (0.0%) | 0 (1.9%) | 0 (1.8%) | 6 (4.4%) | 0 (0.0%) | 4 (2.0%) |
| Singapore | 3 (3.0%) | 0 (2.7%) | 0 (2.5%) | 2 (7.6%) | 0 (0.0%) | 0 (0.0%) | 5 (1.3%) | 0 (1.8%) | 53 (1.5%) |
| Slovakia | 19 (14.6%) | 9 (13.6%) | 2 (12.9%) | 11 (23.1%) | 47 (4.3%) | 26 (4.4%) | 10 (5.1%) | 3 (9.3%) | 263 (7.2%) |
| Slovenia | 7 (14.0%) | 2 (13.4%) | 0 (12.2%) | 7 (23.8%) | 15 (3.9%) | 9 (3.9%) | 6 (4.7%) | 1 (8.9%) | 114 (6.9%) |
| Solomon Islands | 0 (1.6%) | 0 (0.0%) | 0 (0.0%) | 0 (0.0%) | 0 (0.2%) | 0 (0.2%) | 0 (0.8%) | 0 (1.1%) | 1 (0.6%) |
| Somalia | 1 (0.7%) | 0 (0.5%) | 0 (0.5%) | 3 (1.2%) | 0 (0.2%) | 0 (0.2%) | 1 (0.5%) | 0 (0.3%) | 4 (0.2%) |
| South Africa | 69 (11.6%) | 11 (10.3%) | 5 (9.7%) | 297 (21.1%) | 62 (3.7%) | 58 (3.9%) | 106 (9.0%) | 11 (6.5%) | 675 (4.6%) |
| South Sudan | 3 (4.7%) | 0 (0.0%) | 0 (4.3%) | 19 (11.4%) | 1 (1.5%) | 1 (1.9%) | 7 (5.2%) | 0 (4.0%) | 22 (2.1%) |
| Spain | 167 (11.7%) | 25 (11.5%) | 9 (12.5%) | 78 (20.0%) | 371 (3.4%) | 159 (3.6%) | 115 (6.1%) | 32 (8.2%) | 2143 (6.2%) |
| Sri Lanka | 22 (3.9%) | 2 (3.7%) | 3 (3.5%) | 76 (9.9%) | 4 (0.7%) | 5 (0.7%) | 2 (1.6%) | 2 (2.1%) | 87 (1.9%) |
| Sudan | 1 (0.4%) | 0 (0.4%) | 0 (0.4%) | 3 (0.9%) | 0 (0.1%) | 0 (0.1%) | 1 (0.3%) | 0 (0.2%) | 11 (0.2%) |
| Suriname | 0 (6.4%) | 0 (0.0%) | 0 (0.0%) | 0 (0.0%) | 1 (1.6%) | 0 (1.7%) | 1 (2.9%) | 0 (0.0%) | 5 (3.1%) |
| Sweden | 41 (10.9%) | 6 (10.9%) | 2 (10.2%) | 27 (14.5%) | 74 (2.8%) | 26 (3.0%) | 19 (5.5%) | 2 (7.1%) | 431 (5.8%) |
| Switzerland | 27 (13.8%) | 13 (12.6%) | 4 (12.2%) | 34 (19.2%) | 61 (3.8%) | 30 (4.1%) | 23 (6.7%) | 4 (8.2%) | 470 (7.1%) |
| Syrian Arab Republic | 1 (0.7%) | 0 (0.5%) | 0 (0.6%) | 0 (1.0%) | 1 (0.2%) | 1 (0.2%) | 1 (0.3%) | 0 (0.3%) | 10 (0.2%) |
| Tajikistan | 1 (2.1%) | 0 (1.9%) | 0 (2.1%) | 3 (4.8%) | 0 (0.6%) | 0 (0.7%) | 1 (0.9%) | 0 (1.5%) | 7 (0.9%) |
| Tanzania, United Republic of | 18 (8.3%) | 2 (10.3%) | 5 (10.1%) | 193 (18.3%) | 16 (4.3%) | 17 (3.3%) | 37 (8.3%) | 2 (4.5%) | 197 (4.4%) |
| Thailand | 152 (7.4%) | 12 (6.4%) | 6 (7.0%) | 94 (15.9%) | 103 (2.0%) | 99 (2.2%) | 240 (2.7%) | 7 (4.3%) | 854 (4.0%) |
| The Netherlands | 89 (12.7%) | 15 (11.6%) | 6 (11.5%) | 95 (13.6%) | 183 (3.4%) | 71 (3.6%) | 28 (4.3%) | 10 (7.9%) | 1028 (6.5%) |
| The Republic of the Gambia | 0 (0.0%) | 0 (0.0%) | 0 (0.0%) | 0 (0.0%) | 0 (1.1%) | 0 (1.1%) | 2 (3.2%) | 0 (2.9%) | 1 (1.2%) |
| Timor-Leste | 0 (0.4%) | 0 (0.0%) | 0 (0.0%) | 0 (0.0%) | 0 (0.0%) | 0 (0.0%) | 0 (0.2%) | 0 (0.0%) | 0 (0.2%) |
| Togo | 1 (2.4%) | 0 (2.5%) | 0 (1.8%) | 5 (5.9%) | 0 (0.2%) | 0 (0.2%) | 2 (2.1%) | 0 (1.0%) | 11 (1.1%) |
| Trinidad and Tobago | 2 (8.6%) | 0 (8.3%) | 0 (0.0%) | 0 (0.0%) | 2 (1.7%) | 1 (1.9%) | 0 (1.4%) | 0 (0.0%) | 21 (3.7%) |
| Tunisia | 1 (1.0%) | 0 (0.7%) | 0 (1.2%) | 1 (2.1%) | 2 (0.4%) | 1 (0.4%) | 1 (0.4%) | 0 (0.6%) | 13 (0.5%) |
| Turkmenistan | 3 (7.7%) | 1 (6.7%) | 1 (6.7%) | 26 (14.0%) | 1 (2.4%) | 2 (2.6%) | 4 (3.2%) | 0 (3.8%) | 26 (2.6%) |
| T�rkiye | 14 (1.8%) | 1 (1.5%) | 2 (1.9%) | 22 (3.6%) | 40 (0.6%) | 20 (0.6%) | 15 (0.8%) | 3 (1.0%) | 194 (0.8%) |
| Uganda | 19 (13.3%) | 3 (11.9%) | 1 (14.8%) | 265 (27.8%) | 17 (5.8%) | 17 (6.0%) | 111 (13.3%) | 2 (8.3%) | 184 (6.2%) |
| Ukraine | 111 (17.1%) | 33 (16.4%) | 8 (16.5%) | 59 (26.2%) | 356 (6.0%) | 263 (6.1%) | 64 (7.7%) | 12 (11.0%) | 1538 (8.5%) |
| United Arab Emirates | 1 (1.9%) | 0 (1.6%) | 0 (0.0%) | 0 (2.9%) | 1 (0.4%) | 0 (0.4%) | 0 (0.7%) | 0 (0.8%) | 8 (0.7%) |
| United Kingdom | 356 (15.6%) | 101 (14.6%) | 24 (13.1%) | 499 (16.1%) | 664 (4.5%) | 313 (4.7%) | 159 (4.8%) | 40 (9.3%) | 4442 (7.6%) |
| United States of America | 972 (11.2%) | 252 (10.3%) | 48 (10.1%) | 496 (12.4%) | 1523 (3.0%) | 610 (3.3%) | 802 (6.4%) | 171 (7.0%) | 15146 (5.5%) |
| Uruguay | 6 (11.1%) | 1 (10.4%) | 0 (10.8%) | 17 (19.8%) | 25 (3.2%) | 9 (3.4%) | 3 (6.6%) | 2 (7.4%) | 127 (5.8%) |
| Uzbekistan | 8 (3.2%) | 2 (2.8%) | 2 (2.9%) | 55 (7.0%) | 6 (0.9%) | 6 (1.0%) | 8 (1.2%) | 1 (1.9%) | 63 (1.3%) |
| Vanuatu | 0 (1.0%) | 0 (0.0%) | 0 (0.0%) | 0 (0.0%) | 0 (0.1%) | 0 (0.1%) | 0 (0.9%) | 0 (0.0%) | 0 (0.5%) |
| Venezuela | 21 (9.0%) | 6 (8.5%) | 0 (4.9%) | 12 (15.7%) | 58 (2.8%) | 21 (3.0%) | 27 (4.2%) | 4 (5.4%) | 369 (4.4%) |
| Viet Nam | 26 (4.8%) | 5 (4.5%) | 18 (4.3%) | 37 (9.6%) | 30 (1.1%) | 48 (1.1%) | 253 (4.6%) | 8 (2.7%) | 572 (2.3%) |
| Yemen | 0 (0.3%) | 0 (0.2%) | 0 (0.3%) | 2 (0.5%) | 0 (0.1%) | 0 (0.1%) | 0 (0.1%) | 0 (0.1%) | 3 (0.1%) |
| Zambia | 2 (4.8%) | 0 (2.5%) | 0 (5.8%) | 24 (11.6%) | 1 (1.4%) | 2 (1.6%) | 6 (3.9%) | 0 (1.8%) | 24 (2.2%) |
| Zimbabwe | 2 (3.3%) | 0 (2.5%) | 0 (3.4%) | 30 (6.5%) | 2 (1.0%) | 1 (0.9%) | 7 (2.6%) | 0 (1.7%) | 27 (1.5%) |

**Table 5.3.3.** Proportion and number of cancer cases attributable to alcohol consumption, men

| **Country** | **Lip, oral cavity** | **Oropharynx** | **Hypopharynx** | **Oesophagus** | **Colon** | **Rectum** | **Liver and intrahepatic bile ducts** | **Larynx** |
| --- | --- | --- | --- | --- | --- | --- | --- | --- |
| **N (PAF)** | **N (PAF)** | **N (PAF)** | **N (PAF)** | **N (PAF)** | **N (PAF)** | **N (PAF)** | **N (PAF)** |
| Afghanistan | 11 (1.6%) | 1 (1.3%) | 1 (1.4%) | 17 (3.2%) | 1 (0.5%) | 2 (0.5%) | 5 (1.0%) | 2 (0.9%) |
| Albania | 19 (29.8%) | 4 (29.0%) | 2 (25.9%) | 16 (28.5%) | 20 (12.8%) | 21 (13.6%) | 25 (22.9%) | 28 (19.5%) |
| Algeria | 9 (3.8%) | 2 (2.9%) | 2 (2.9%) | 7 (4.7%) | 29 (1.2%) | 20 (1.2%) | 8 (1.9%) | 18 (2.1%) |
| Angola | 101 (35.9%) | 61 (33.3%) | 2 (33.0%) | 341 (50.0%) | 31 (15.6%) | 28 (15.5%) | 206 (28.7%) | 54 (21.5%) |
| Argentina | 289 (36.2%) | 103 (31.9%) | 23 (31.4%) | 444 (31.0%) | 994 (14.5%) | 249 (14.7%) | 301 (19.6%) | 233 (21.7%) |
| Armenia | 15 (26.1%) | 1 (22.5%) | 3 (23.8%) | 10 (25.7%) | 38 (9.8%) | 11 (9.7%) | 58 (18.9%) | 19 (15.7%) |
| Australia | 754 (42.0%) | 322 (37.7%) | 69 (36.8%) | 237 (18.4%) | 1014 (17.8%) | 549 (18.3%) | 790 (32.1%) | 132 (25.9%) |
| Austria | 180 (42.5%) | 101 (37.6%) | 48 (37.6%) | 126 (32.4%) | 292 (17.8%) | 167 (18.3%) | 210 (27.2%) | 76 (26.2%) |
| Azerbaijan | 22 (15.2%) | 4 (15.1%) | 4 (15.0%) | 81 (17.1%) | 28 (6.0%) | 20 (6.1%) | 37 (11.9%) | 32 (9.6%) |
| Bahamas | 1 (20.6%) | 0 (17.0%) | 0 (0.0%) | 2 (19.2%) | 2 (6.2%) | 1 (6.2%) | 1 (9.0%) | 1 (10.6%) |
| Bahrain | 2 (7.7%) | 0 (7.3%) | 0 (0.0%) | 0 (4.6%) | 1 (1.8%) | 1 (1.8%) | 1 (5.2%) | 1 (4.1%) |
| Bangladesh | 159 (1.5%) | 49 (1.3%) | 94 (1.3%) | 609 (3.7%) | 5 (0.3%) | 5 (0.3%) | 21 (0.9%) | 44 (0.9%) |
| Barbados | 3 (33.7%) | 2 (30.6%) | 2 (29.2%) | 0 (0.0%) | 6 (13.2%) | 4 (13.9%) | 1 (15.4%) | 2 (17.5%) |
| Belarus | 368 (49.0%) | 194 (43.8%) | 161 (43.7%) | 304 (57.5%) | 376 (22.6%) | 310 (22.6%) | 129 (30.9%) | 212 (31.3%) |
| Belgium | 296 (41.2%) | 140 (36.4%) | 75 (36.5%) | 230 (27.3%) | 486 (17.0%) | 234 (17.3%) | 273 (30.3%) | 99 (25.2%) |
| Belize | 0 (0.0%) | 0 (0.0%) | 0 (0.0%) | 1 (35.6%) | 1 (12.2%) | 0 (0.0%) | 2 (16.6%) | 1 (17.8%) |
| Benin | 3 (7.9%) | 2 (8.9%) | 1 (11.0%) | 21 (19.1%) | 6 (3.5%) | 3 (3.6%) | 46 (10.9%) | 2 (6.5%) |
| Bhutan | 2 (10.3%) | 1 (12.7%) | 1 (10.4%) | 6 (23.4%) | 0 (4.2%) | 0 (3.8%) | 2 (8.0%) | 1 (7.2%) |
| Bolivia | 11 (26.6%) | 12 (23.1%) | 0 (0.0%) | 39 (32.2%) | 30 (10.0%) | 6 (10.2%) | 62 (15.6%) | 17 (14.6%) |
| Bosnia Herzegovina | 37 (31.2%) | 9 (27.6%) | 12 (27.7%) | 23 (29.9%) | 67 (12.1%) | 64 (12.2%) | 59 (21.3%) | 43 (18.4%) |
| Botswana | 21 (34.8%) | 2 (29.3%) | 2 (29.0%) | 41 (44.4%) | 3 (14.2%) | 2 (13.7%) | 3 (22.2%) | 6 (19.3%) |
| Brazil | 2894 (35.0%) | 1447 (30.4%) | 405 (30.8%) | 4060 (46.1%) | 2295 (14.0%) | 1802 (14.2%) | 1814 (22.8%) | 1486 (20.7%) |
| Brunei Darussalam | 0 (0.0%) | 0 (0.0%) | 0 (0.0%) | 0 (5.4%) | 0 (0.0%) | 0 (0.0%) | 1 (2.2%) | 0 (1.8%) |
| Bulgaria | 120 (41.7%) | 34 (37.0%) | 30 (36.9%) | 89 (48.3%) | 328 (17.6%) | 190 (17.8%) | 140 (32.2%) | 100 (25.7%) |
| Burkina Faso | 41 (29.6%) | 3 (11.9%) | 0 (0.0%) | 66 (40.7%) | 9 (11.7%) | 4 (8.7%) | 271 (24.4%) | 11 (18.1%) |
| Burundi | 21 (29.0%) | 6 (28.7%) | 4 (27.9%) | 127 (44.6%) | 10 (12.5%) | 9 (12.4%) | 50 (24.2%) | 8 (17.7%) |
| Cambodia | 69 (27.3%) | 20 (21.3%) | 19 (23.8%) | 111 (39.3%) | 46 (10.4%) | 37 (10.7%) | 472 (19.7%) | 23 (15.4%) |
| Cameroon | 50 (32.8%) | 47 (31.2%) | 45 (32.7%) | 41 (50.0%) | 34 (14.1%) | 27 (14.4%) | 201 (27.6%) | 6 (22.1%) |
| Canada | 850 (38.1%) | 375 (34.2%) | 63 (33.1%) | 347 (15.2%) | 1302 (15.5%) | 713 (16.1%) | 869 (27.0%) | 197 (22.8%) |
| Cape Verde | 5 (34.9%) | 0 (31.4%) | 1 (31.6%) | 7 (46.9%) | 2 (13.0%) | 0 (12.3%) | 1 (28.2%) | 1 (20.4%) |
| Central African Republic | 4 (19.2%) | 1 (18.3%) | 0 (0.0%) | 6 (36.2%) | 3 (7.5%) | 2 (7.2%) | 18 (15.6%) | 1 (12.7%) |
| Chad | 8 (24.8%) | 0 (0.0%) | 0 (0.0%) | 16 (38.1%) | 6 (9.5%) | 8 (9.2%) | 189 (19.6%) | 5 (14.9%) |
| Chile | 78 (35.2%) | 26 (31.8%) | 14 (30.5%) | 258 (47.8%) | 309 (14.7%) | 177 (14.9%) | 271 (30.3%) | 46 (21.3%) |
| China | 7703 (31.9%) | 1807 (27.9%) | 2524 (28.1%) | 77331 (46.2%) | 19132 (12.5%) | 19350 (12.8%) | 65977 (24.6%) | 5200 (19.1%) |
| Colombia | 90 (22.8%) | 88 (20.9%) | 17 (18.9%) | 127 (18.3%) | 310 (8.5%) | 143 (8.7%) | 170 (13.6%) | 105 (13.1%) |
| Comoros | 0 (2.1%) | 0 (0.0%) | 0 (0.0%) | 1 (3.4%) | 0 (0.6%) | 0 (0.6%) | 0 (1.4%) | 0 (0.0%) |
| Congo, Democratic Republic of | 43 (13.8%) | 11 (12.6%) | 10 (12.9%) | 224 (27.2%) | 27 (4.4%) | 26 (4.2%) | 238 (11.0%) | 17 (7.9%) |
| Congo, Republic of | 3 (30.7%) | 1 (26.9%) | 0 (0.0%) | 3 (43.3%) | 4 (12.1%) | 4 (11.5%) | 20 (10.4%) | 2 (15.7%) |
| Costa Rica | 14 (21.4%) | 5 (18.3%) | 2 (17.4%) | 10 (19.1%) | 23 (7.3%) | 13 (7.6%) | 30 (12.4%) | 9 (12.0%) |
| Croatia | 87 (40.9%) | 51 (36.2%) | 37 (35.9%) | 78 (45.6%) | 256 (16.9%) | 165 (17.2%) | 105 (28.2%) | 62 (25.0%) |
| Cuba | 186 (23.5%) | 129 (20.1%) | 34 (19.9%) | 188 (23.3%) | 130 (7.7%) | 32 (8.1%) | 38 (7.3%) | 210 (13.5%) |
| Cyprus | 11 (40.6%) | 2 (36.2%) | 0 (0.0%) | 4 (30.1%) | 38 (17.0%) | 16 (17.2%) | 15 (18.6%) | 10 (25.0%) |
| Czechia | 267 (44.4%) | 160 (39.3%) | 51 (39.3%) | 189 (34.2%) | 468 (19.2%) | 359 (19.5%) | 170 (25.9%) | 115 (27.7%) |
| C�te d'Ivoire | 30 (29.7%) | 7 (30.0%) | 2 (17.2%) | 24 (46.1%) | 52 (13.2%) | 18 (12.7%) | 250 (28.3%) | 24 (18.6%) |
| Denmark | 117 (39.7%) | 115 (35.3%) | 35 (34.8%) | 106 (23.8%) | 419 (16.3%) | 193 (16.6%) | 111 (25.5%) | 46 (24.2%) |
| Djibouti | 0 (5.6%) | 0 (0.0%) | 0 (0.0%) | 1 (10.5%) | 0 (1.8%) | 0 (1.6%) | 1 (4.1%) | 0 (2.9%) |
| Dominican Republic | 28 (29.6%) | 39 (25.9%) | 4 (26.6%) | 33 (26.7%) | 88 (11.4%) | 15 (12.2%) | 67 (14.9%) | 43 (17.5%) |
| Ecuador | 29 (23.8%) | 12 (22.2%) | 2 (18.2%) | 41 (27.6%) | 75 (8.9%) | 25 (8.8%) | 87 (16.5%) | 18 (14.3%) |
| Egypt | 16 (2.3%) | 2 (1.7%) | 2 (1.7%) | 27 (3.1%) | 11 (0.6%) | 5 (0.5%) | 380 (2.1%) | 20 (1.3%) |
| El Salvador | 6 (14.3%) | 2 (12.1%) | 1 (11.4%) | 8 (15.3%) | 13 (5.4%) | 4 (6.0%) | 16 (7.9%) | 3 (9.0%) |
| Equatorial Guinea | 5 (39.4%) | 2 (34.9%) | 0 (0.0%) | 2 (47.8%) | 2 (14.5%) | 2 (15.1%) | 17 (29.9%) | 2 (24.4%) |
| Eritrea | 1 (5.9%) | 0 (0.0%) | 0 (0.0%) | 4 (14.3%) | 1 (1.6%) | 1 (1.4%) | 3 (4.9%) | 1 (3.8%) |
| Estonia | 29 (42.3%) | 13 (37.7%) | 11 (37.3%) | 40 (52.4%) | 59 (17.9%) | 35 (18.0%) | 23 (27.5%) | 14 (26.2%) |
| Eswatini | 1 (31.7%) | 1 (27.1%) | 0 (0.0%) | 3 (39.2%) | 1 (11.7%) | 0 (12.4%) | 5 (25.3%) | 0 (16.8%) |
| Ethiopia | 77 (15.6%) | 15 (14.8%) | 4 (9.1%) | 176 (30.9%) | 122 (7.0%) | 94 (6.5%) | 221 (13.4%) | 41 (10.2%) |
| Fiji | 2 (17.5%) | 0 (16.0%) | 0 (0.0%) | 2 (19.7%) | 1 (5.4%) | 1 (5.9%) | 8 (12.2%) | 1 (9.1%) |
| Finland | 124 (41.7%) | 33 (37.6%) | 13 (37.2%) | 68 (25.1%) | 225 (17.9%) | 155 (18.2%) | 132 (29.2%) | 28 (26.1%) |
| France (metropolitan) | 2017 (42.6%) | 1097 (37.8%) | 790 (37.4%) | 1325 (35.8%) | 3057 (17.9%) | 1682 (18.2%) | 2769 (31.8%) | 733 (26.1%) |
| France, Guadeloupe | 7 (33.5%) | 5 (28.3%) | 3 (28.2%) | 12 (47.8%) | 9 (12.5%) | 4 (13.5%) | 5 (19.3%) | 4 (17.7%) |
| France, La R�union | 13 (23.3%) | 8 (19.4%) | 6 (21.8%) | 19 (38.1%) | 8 (8.3%) | 6 (7.9%) | 9 (13.6%) | 6 (14.3%) |
| France, Martinique | 5 (33.5%) | 3 (28.7%) | 1 (28.1%) | 6 (47.0%) | 9 (12.4%) | 4 (12.8%) | 5 (23.4%) | 1 (17.9%) |
| French Guyana | 1 (35.3%) | 2 (30.1%) | 0 (0.0%) | 1 (35.6%) | 3 (13.5%) | 1 (14.6%) | 2 (18.6%) | 1 (20.0%) |
| French Polynesia | 1 (9.6%) | 1 (9.2%) | 0 (1.8%) | 2 (15.4%) | 1 (3.1%) | 0 (2.9%) | 2 (8.1%) | 0 (5.3%) |
| Gabon | 15 (40.3%) | 4 (34.5%) | 0 (37.2%) | 8 (53.1%) | 6 (16.7%) | 3 (16.5%) | 31 (33.8%) | 7 (25.0%) |
| Gaza Strip and West Bank | 3 (10.4%) | 1 (13.0%) | 0 (0.0%) | 1 (10.5%) | 6 (3.1%) | 4 (3.4%) | 6 (6.8%) | 4 (6.1%) |
| Georgia | 64 (39.6%) | 13 (34.5%) | 22 (35.4%) | 19 (32.8%) | 47 (16.9%) | 53 (16.7%) | 96 (29.3%) | 69 (24.1%) |
| Germany | 1519 (43.1%) | 1287 (38.2%) | 622 (38.1%) | 1619 (28.8%) | 3512 (17.9%) | 2305 (18.5%) | 1973 (29.5%) | 833 (26.4%) |
| Ghana | 46 (27.9%) | 16 (24.5%) | 6 (24.6%) | 80 (40.0%) | 13 (9.4%) | 28 (9.9%) | 597 (22.5%) | 25 (15.3%) |
| Greece | 167 (39.1%) | 18 (34.7%) | 6 (33.5%) | 71 (34.8%) | 589 (16.0%) | 92 (16.3%) | 303 (27.6%) | 188 (23.9%) |
| Guam | 0 (8.7%) | 0 (7.7%) | 0 (0.0%) | 0 (13.5%) | 1 (3.2%) | 0 (3.2%) | 2 (8.4%) | 0 (5.4%) |
| Guatemala | 9 (16.8%) | 3 (12.9%) | 1 (14.8%) | 15 (16.6%) | 22 (5.9%) | 3 (6.7%) | 86 (8.7%) | 6 (9.4%) |
| Guinea | 1 (3.3%) | 0 (2.8%) | 0 (4.1%) | 2 (8.1%) | 0 (1.0%) | 0 (0.7%) | 34 (3.7%) | 1 (2.3%) |
| Guinea-Bissau | 1 (24.2%) | 0 (0.0%) | 0 (0.0%) | 2 (31.4%) | 1 (8.5%) | 1 (8.8%) | 18 (20.1%) | 0 (13.8%) |
| Guyana | 2 (27.4%) | 0 (23.7%) | 0 (23.7%) | 2 (35.6%) | 4 (9.7%) | 1 (9.1%) | 3 (17.1%) | 2 (16.1%) |
| Haiti | 29 (28.2%) | 14 (25.2%) | 1 (25.7%) | 26 (26.0%) | 36 (10.6%) | 4 (11.3%) | 66 (13.8%) | 8 (16.3%) |
| Honduras | 10 (17.5%) | 1 (17.0%) | 1 (14.8%) | 13 (17.5%) | 11 (6.6%) | 7 (6.9%) | 22 (8.2%) | 25 (10.6%) |
| Hungary | 346 (41.9%) | 185 (37.1%) | 180 (37.1%) | 226 (48.3%) | 597 (17.7%) | 399 (18.0%) | 199 (31.0%) | 177 (25.8%) |
| Iceland | 4 (28.9%) | 1 (26.6%) | 0 (0.0%) | 4 (20.7%) | 8 (11.2%) | 4 (11.5%) | 5 (19.0%) | 1 (17.2%) |
| India | 23406 (21.7%) | 3687 (18.9%) | 4398 (18.3%) | 15764 (34.6%) | 1709 (7.9%) | 1516 (8.0%) | 3939 (14.4%) | 3895 (12.4%) |
| Indonesia | 148 (3.7%) | 34 (3.1%) | 6 (3.1%) | 83 (7.9%) | 94 (0.9%) | 88 (0.9%) | 467 (2.5%) | 80 (2.2%) |
| Iran, Islamic Republic of | 30 (4.0%) | 2 (2.9%) | 2 (3.6%) | 129 (6.5%) | 65 (1.3%) | 31 (1.3%) | 60 (1.9%) | 45 (2.0%) |
| Iraq | 4 (3.1%) | 0 (2.7%) | 0 (2.9%) | 6 (4.2%) | 9 (1.0%) | 4 (1.0%) | 9 (2.2%) | 7 (1.7%) |
| Ireland | 105 (41.8%) | 35 (37.6%) | 18 (37.2%) | 70 (19.9%) | 189 (17.8%) | 125 (18.1%) | 87 (25.3%) | 42 (25.9%) |
| Israel | 14 (12.7%) | 2 (11.9%) | 1 (11.1%) | 13 (11.5%) | 39 (3.2%) | 16 (3.4%) | 18 (8.5%) | 13 (7.9%) |
| Italy | 858 (29.7%) | 282 (26.8%) | 128 (26.3%) | 502 (28.9%) | 2266 (11.3%) | 974 (11.5%) | 1817 (22.5%) | 659 (18.0%) |
| Jamaica | 3 (18.8%) | 3 (17.5%) | 1 (17.9%) | 11 (19.7%) | 24 (6.7%) | 8 (7.1%) | 5 (9.3%) | 6 (11.2%) |
| Japan | 1863 (28.5%) | 611 (25.2%) | 1058 (25.0%) | 7085 (45.2%) | 5218 (10.6%) | 3334 (10.9%) | 6570 (22.9%) | 820 (17.1%) |
| Jordan | 3 (4.3%) | 0 (3.5%) | 0 (3.4%) | 3 (5.4%) | 6 (1.3%) | 2 (1.5%) | 3 (2.4%) | 5 (2.4%) |
| Kazakhstan | 161 (36.9%) | 36 (32.5%) | 17 (32.2%) | 274 (49.3%) | 143 (15.3%) | 126 (15.4%) | 152 (21.3%) | 104 (22.3%) |
| Kenya | 74 (20.3%) | 13 (19.9%) | 14 (19.4%) | 602 (37.2%) | 75 (8.3%) | 46 (8.7%) | 74 (15.8%) | 43 (13.5%) |
| Korea, Democratic People Republic of | 40 (18.4%) | 11 (16.1%) | 14 (16.2%) | 433 (32.7%) | 100 (6.0%) | 127 (6.1%) | 586 (14.1%) | 52 (10.7%) |
| Korea, Republic of | 414 (36.2%) | 233 (32.6%) | 159 (31.9%) | 1172 (54.6%) | 1476 (15.1%) | 1131 (15.3%) | 3188 (28.3%) | 265 (22.4%) |
| Kuwait | 0 (0.0%) | 0 (0.0%) | 0 (0.0%) | 0 (0.1%) | 0 (0.0%) | 0 (0.0%) | 0 (0.0%) | 0 (0.0%) |
| Kyrgyzstan | 22 (30.8%) | 4 (25.7%) | 7 (25.1%) | 47 (40.9%) | 12 (12.0%) | 14 (12.1%) | 54 (19.9%) | 12 (16.9%) |
| Lao People's Democratic Republic | 36 (32.2%) | 7 (27.3%) | 15 (29.6%) | 105 (44.7%) | 30 (12.9%) | 24 (13.2%) | 232 (23.9%) | 13 (19.7%) |
| Latvia | 49 (42.0%) | 21 (37.0%) | 21 (36.8%) | 52 (49.2%) | 50 (17.4%) | 45 (17.5%) | 32 (27.5%) | 26 (25.8%) |
| Lebanon | 6 (11.2%) | 0 (9.8%) | 0 (10.0%) | 4 (13.1%) | 17 (3.7%) | 6 (3.8%) | 4 (4.4%) | 8 (6.4%) |
| Lesotho | 6 (30.0%) | 2 (25.7%) | 0 (0.0%) | 24 (40.7%) | 3 (10.9%) | 2 (10.5%) | 8 (25.3%) | 2 (16.5%) |
| Liberia | 5 (23.7%) | 1 (23.5%) | 0 (0.0%) | 4 (39.1%) | 5 (9.4%) | 2 (9.0%) | 69 (22.0%) | 3 (14.7%) |
| Libya | 0 (0.3%) | 0 (0.2%) | 0 (0.1%) | 0 (0.4%) | 0 (0.0%) | 0 (0.0%) | 0 (0.2%) | 0 (0.2%) |
| Lithuania | 98 (47.1%) | 41 (41.8%) | 48 (41.9%) | 118 (58.3%) | 91 (20.8%) | 67 (20.8%) | 63 (31.7%) | 53 (29.6%) |
| Luxembourg | 5 (41.1%) | 2 (36.2%) | 3 (36.3%) | 6 (23.9%) | 20 (16.5%) | 9 (17.0%) | 12 (28.2%) | 5 (24.9%) |
| Madagascar | 32 (11.0%) | 18 (10.0%) | 11 (10.0%) | 100 (21.7%) | 5 (2.9%) | 4 (2.8%) | 52 (8.4%) | 5 (6.0%) |
| Malawi | 13 (13.9%) | 0 (15.4%) | 0 (0.0%) | 303 (30.6%) | 7 (6.3%) | 7 (6.0%) | 36 (13.1%) | 4 (9.1%) |
| Malaysia | 26 (6.1%) | 7 (5.6%) | 5 (5.1%) | 44 (14.1%) | 25 (1.2%) | 22 (1.3%) | 92 (5.3%) | 21 (3.6%) |
| Maldives | 1 (12.7%) | 0 (0.0%) | 0 (0.0%) | 0 (0.0%) | 1 (3.5%) | 1 (3.8%) | 2 (6.9%) | 0 (6.2%) |
| Mali | 5 (5.4%) | 1 (5.1%) | 1 (6.2%) | 17 (13.0%) | 4 (2.2%) | 5 (2.2%) | 32 (5.5%) | 2 (3.7%) |
| Malta | 5 (30.3%) | 1 (27.1%) | 1 (27.3%) | 3 (17.0%) | 11 (11.1%) | 6 (11.3%) | 6 (15.1%) | 4 (17.6%) |
| Mauritania | 0 (0.3%) | 0 (0.3%) | 0 (0.2%) | 0 (0.9%) | 0 (0.0%) | 0 (0.0%) | 0 (0.3%) | 0 (0.2%) |
| Mauritius | 7 (18.2%) | 2 (16.7%) | 1 (16.5%) | 7 (22.3%) | 8 (5.7%) | 4 (6.0%) | 4 (9.0%) | 4 (10.6%) |
| Mexico | 228 (28.5%) | 68 (24.0%) | 28 (23.3%) | 260 (24.2%) | 686 (11.3%) | 245 (11.4%) | 586 (13.8%) | 156 (16.1%) |
| Moldova | 119 (48.4%) | 86 (43.2%) | 49 (43.3%) | 65 (52.6%) | 144 (22.4%) | 99 (22.5%) | 165 (36.6%) | 102 (30.9%) |
| Mongolia | 6 (30.2%) | 3 (26.2%) | 2 (27.5%) | 98 (44.7%) | 10 (11.9%) | 3 (12.2%) | 346 (24.0%) | 5 (17.8%) |
| Montenegro | 5 (41.2%) | 2 (37.3%) | 3 (35.8%) | 6 (37.2%) | 16 (17.0%) | 11 (17.6%) | 10 (28.6%) | 10 (25.2%) |
| Morocco | 24 (6.0%) | 4 (4.6%) | 2 (3.8%) | 16 (6.4%) | 27 (1.9%) | 23 (1.9%) | 17 (2.8%) | 33 (3.0%) |
| Mozambique | 12 (8.4%) | 7 (7.3%) | 0 (0.0%) | 106 (18.6%) | 1 (2.2%) | 3 (2.4%) | 59 (6.7%) | 3 (5.3%) |
| Myanmar | 250 (15.1%) | 79 (13.2%) | 166 (13.3%) | 795 (26.9%) | 65 (4.7%) | 64 (4.7%) | 435 (10.9%) | 98 (8.7%) |
| Namibia | 24 (37.5%) | 5 (33.1%) | 2 (32.4%) | 14 (47.8%) | 7 (16.1%) | 4 (15.3%) | 9 (22.4%) | 7 (22.2%) |
| Nepal | 86 (12.3%) | 5 (10.7%) | 9 (10.0%) | 36 (22.9%) | 15 (3.3%) | 7 (3.5%) | 30 (7.1%) | 23 (7.1%) |
| New Caledonia | 1 (8.4%) | 1 (9.2%) | 0 (5.9%) | 2 (15.1%) | 1 (3.1%) | 1 (3.1%) | 2 (7.5%) | 0 (4.9%) |
| New Zealand | 99 (40.9%) | 29 (36.7%) | 9 (35.1%) | 37 (14.1%) | 239 (16.9%) | 142 (17.4%) | 71 (29.7%) | 28 (25.0%) |
| Nicaragua | 5 (24.9%) | 4 (20.2%) | 1 (16.2%) | 8 (20.4%) | 18 (8.6%) | 6 (9.1%) | 35 (11.3%) | 8 (13.3%) |
| Niger | 1 (1.6%) | 0 (1.6%) | 0 (1.7%) | 5 (4.1%) | 1 (0.2%) | 0 (0.2%) | 11 (1.3%) | 1 (1.0%) |
| Nigeria | 313 (38.7%) | 54 (34.3%) | 18 (35.2%) | 164 (50.5%) | 332 (16.9%) | 285 (17.2%) | 801 (31.8%) | 158 (23.2%) |
| North Macedonia | 11 (27.6%) | 3 (24.0%) | 1 (22.3%) | 9 (28.4%) | 30 (10.9%) | 28 (11.1%) | 25 (19.8%) | 18 (16.9%) |
| Norway | 92 (34.0%) | 36 (30.9%) | 8 (30.5%) | 42 (15.4%) | 247 (13.6%) | 134 (13.9%) | 63 (20.4%) | 19 (20.7%) |
| Oman | 2 (3.1%) | 0 (2.7%) | 0 (2.5%) | 1 (4.6%) | 0 (0.2%) | 0 (0.2%) | 2 (2.0%) | 1 (1.9%) |
| Pakistan | 134 (1.3%) | 8 (1.0%) | 14 (1.0%) | 121 (2.5%) | 11 (0.4%) | 8 (0.4%) | 33 (1.0%) | 22 (0.7%) |
| Panama | 9 (29.3%) | 9 (26.1%) | 4 (23.4%) | 11 (25.8%) | 32 (12.1%) | 14 (12.3%) | 17 (14.5%) | 6 (17.5%) |
| Papua New Guinea | 64 (9.0%) | 7 (7.3%) | 1 (7.7%) | 19 (13.9%) | 5 (2.8%) | 4 (2.7%) | 26 (5.9%) | 5 (5.1%) |
| Paraguay | 37 (34.7%) | 43 (30.8%) | 9 (29.3%) | 66 (38.0%) | 84 (13.2%) | 21 (14.0%) | 25 (21.1%) | 22 (19.9%) |
| Peru | 98 (31.9%) | 44 (28.2%) | 19 (26.7%) | 89 (32.8%) | 209 (12.5%) | 62 (12.7%) | 192 (20.4%) | 34 (18.7%) |
| Philippines | 337 (31.5%) | 112 (27.8%) | 50 (27.1%) | 283 (26.7%) | 882 (12.5%) | 530 (12.7%) | 1988 (22.6%) | 311 (18.3%) |
| Poland | 1137 (40.2%) | 474 (35.7%) | 343 (35.5%) | 743 (47.0%) | 1421 (16.9%) | 1179 (17.0%) | 396 (25.5%) | 633 (24.7%) |
| Portugal | 417 (44.8%) | 213 (39.9%) | 138 (40.1%) | 308 (51.9%) | 741 (19.4%) | 426 (19.6%) | 343 (27.0%) | 193 (28.0%) |
| Puerto Rico | 42 (32.2%) | 26 (28.2%) | 6 (26.6%) | 33 (28.1%) | 84 (12.3%) | 36 (13.2%) | 67 (22.1%) | 21 (18.2%) |
| Qatar | 2 (6.0%) | 0 (5.8%) | 0 (5.5%) | 1 (7.2%) | 1 (1.5%) | 1 (1.6%) | 1 (2.7%) | 1 (3.7%) |
| Romania | 776 (46.0%) | 561 (41.1%) | 299 (41.0%) | 321 (51.2%) | 909 (20.4%) | 714 (20.5%) | 836 (35.3%) | 488 (29.0%) |
| Russian Federation | 3109 (47.1%) | 1534 (41.8%) | 1032 (41.8%) | 3764 (53.0%) | 4921 (21.0%) | 3267 (21.3%) | 2676 (38.7%) | 1924 (29.4%) |
| Rwanda | 22 (35.7%) | 10 (34.3%) | 1 (27.6%) | 51 (49.8%) | 15 (17.0%) | 19 (16.7%) | 89 (31.5%) | 15 (22.0%) |
| Saint Lucia | 4 (39.0%) | 0 (33.8%) | 0 (0.0%) | 1 (28.6%) | 2 (14.2%) | 1 (13.7%) | 1 (20.4%) | 1 (21.0%) |
| Samoa | 1 (19.8%) | 0 (0.0%) | 0 (0.0%) | 0 (0.0%) | 1 (6.7%) | 1 (6.7%) | 1 (14.4%) | 0 (6.1%) |
| Sao Tome and Principe | 0 (0.0%) | 0 (0.0%) | 0 (0.0%) | 0 (0.0%) | 0 (16.3%) | 0 (16.0%) | 3 (32.9%) | 0 (19.7%) |
| Saudi Arabia | 2 (0.7%) | 0 (0.6%) | 0 (0.6%) | 2 (1.2%) | 1 (0.1%) | 1 (0.1%) | 5 (0.5%) | 1 (0.4%) |
| Senegal | 2 (2.9%) | 0 (3.4%) | 0 (1.9%) | 6 (7.3%) | 1 (0.9%) | 1 (0.9%) | 20 (3.0%) | 1 (2.1%) |
| Serbia | 207 (40.8%) | 49 (36.5%) | 61 (37.3%) | 74 (36.4%) | 289 (17.9%) | 313 (18.1%) | 81 (15.9%) | 150 (25.7%) |
| Sierra Leone | 0 (23.2%) | 0 (0.0%) | 0 (0.0%) | 0 (44.9%) | 0 (11.5%) | 0 (10.1%) | 54 (23.3%) | 0 (0.0%) |
| Singapore | 15 (9.0%) | 5 (7.9%) | 3 (7.7%) | 37 (18.3%) | 16 (1.2%) | 11 (1.2%) | 72 (6.6%) | 9 (5.5%) |
| Slovakia | 203 (41.7%) | 146 (37.0%) | 92 (37.0%) | 131 (48.4%) | 237 (17.6%) | 192 (17.9%) | 86 (25.2%) | 70 (25.9%) |
| Slovenia | 43 (40.2%) | 30 (35.8%) | 20 (35.4%) | 36 (44.4%) | 92 (16.7%) | 69 (17.0%) | 62 (26.4%) | 27 (24.7%) |
| Solomon Islands | 1 (7.4%) | 0 (0.0%) | 0 (0.0%) | 0 (0.0%) | 0 (2.5%) | 0 (2.9%) | 2 (6.1%) | 0 (5.1%) |
| Somalia | 3 (2.7%) | 0 (2.4%) | 0 (2.0%) | 9 (5.5%) | 2 (1.0%) | 1 (1.0%) | 4 (2.1%) | 1 (1.5%) |
| South Africa | 396 (37.5%) | 117 (32.8%) | 41 (31.2%) | 1030 (53.9%) | 284 (15.0%) | 269 (15.4%) | 437 (29.7%) | 179 (21.9%) |
| South Sudan | 13 (20.8%) | 2 (17.8%) | 2 (19.0%) | 68 (37.0%) | 9 (8.6%) | 7 (7.9%) | 41 (18.5%) | 7 (14.0%) |
| Spain | 995 (38.7%) | 306 (34.7%) | 208 (34.7%) | 629 (34.6%) | 2454 (16.0%) | 1348 (16.3%) | 1282 (28.4%) | 634 (23.9%) |
| Sri Lanka | 375 (18.8%) | 71 (16.5%) | 56 (16.1%) | 361 (32.3%) | 30 (6.3%) | 36 (6.2%) | 32 (11.2%) | 75 (10.8%) |
| Sudan | 11 (3.3%) | 1 (2.7%) | 1 (2.8%) | 19 (4.6%) | 5 (1.1%) | 4 (1.0%) | 23 (2.8%) | 5 (1.9%) |
| Suriname | 2 (28.7%) | 0 (22.2%) | 0 (0.0%) | 1 (30.5%) | 5 (10.4%) | 1 (10.9%) | 4 (16.9%) | 1 (13.4%) |
| Sweden | 156 (35.6%) | 60 (32.4%) | 17 (31.0%) | 84 (18.6%) | 361 (14.4%) | 219 (14.7%) | 175 (26.2%) | 29 (21.6%) |
| Switzerland | 202 (40.1%) | 84 (35.6%) | 50 (35.3%) | 116 (24.0%) | 295 (16.6%) | 175 (16.9%) | 221 (28.6%) | 46 (24.7%) |
| Syrian Arab Republic | 3 (3.0%) | 0 (2.3%) | 0 (2.4%) | 2 (3.3%) | 5 (0.9%) | 2 (1.0%) | 4 (2.0%) | 5 (1.4%) |
| Tajikistan | 5 (12.4%) | 2 (10.8%) | 1 (10.4%) | 15 (20.9%) | 5 (4.5%) | 5 (4.4%) | 12 (8.2%) | 1 (6.8%) |
| Tanzania, United Republic of | 124 (29.0%) | 23 (30.9%) | 51 (30.4%) | 1151 (46.4%) | 64 (13.0%) | 29 (11.9%) | 197 (28.6%) | 41 (18.4%) |
| Thailand | 771 (31.4%) | 248 (28.4%) | 205 (27.7%) | 1272 (46.3%) | 662 (12.0%) | 552 (12.2%) | 3242 (16.9%) | 272 (17.9%) |
| The Netherlands | 330 (38.3%) | 102 (34.0%) | 60 (33.7%) | 264 (13.0%) | 1017 (15.7%) | 554 (16.1%) | 227 (23.9%) | 124 (23.4%) |
| The Republic of the Gambia | 1 (12.6%) | 0 (0.0%) | 0 (0.0%) | 0 (0.0%) | 0 (7.1%) | 1 (7.5%) | 31 (14.4%) | 1 (11.2%) |
| Timor-Leste | 0 (1.5%) | 0 (0.0%) | 0 (0.0%) | 0 (4.5%) | 0 (0.0%) | 0 (0.0%) | 0 (1.1%) | 0 (0.8%) |
| Togo | 4 (10.0%) | 3 (9.7%) | 0 (8.0%) | 20 (22.9%) | 4 (3.1%) | 2 (3.4%) | 12 (9.3%) | 3 (6.4%) |
| Trinidad and Tobago | 6 (29.5%) | 3 (25.7%) | 2 (23.6%) | 10 (40.6%) | 15 (10.7%) | 8 (11.3%) | 4 (11.8%) | 5 (16.4%) |
| Tunisia | 12 (7.0%) | 2 (6.3%) | 1 (6.5%) | 4 (8.4%) | 13 (2.6%) | 10 (2.5%) | 16 (4.8%) | 17 (3.7%) |
| Turkmenistan | 30 (27.0%) | 7 (22.8%) | 7 (23.4%) | 80 (38.4%) | 6 (10.6%) | 9 (10.6%) | 33 (17.4%) | 8 (15.2%) |
| T�rkiye | 163 (11.2%) | 18 (9.4%) | 15 (9.0%) | 100 (13.8%) | 255 (3.7%) | 171 (3.7%) | 238 (7.3%) | 211 (5.7%) |
| Uganda | 130 (41.1%) | 29 (35.4%) | 23 (36.8%) | 800 (54.0%) | 77 (17.8%) | 50 (18.7%) | 332 (29.4%) | 55 (25.4%) |
| Ukraine | 1200 (45.4%) | 494 (40.3%) | 474 (40.3%) | 1243 (55.3%) | 1061 (20.0%) | 1002 (20.2%) | 339 (26.2%) | 701 (28.3%) |
| United Arab Emirates | 7 (11.5%) | 1 (9.9%) | 0 (8.1%) | 3 (13.4%) | 8 (3.9%) | 5 (4.0%) | 4 (7.7%) | 3 (6.4%) |
| United Kingdom | 1698 (42.6%) | 854 (38.1%) | 229 (37.2%) | 856 (13.2%) | 2922 (17.9%) | 1769 (18.3%) | 1291 (26.2%) | 496 (26.0%) |
| United States of America | 6763 (35.8%) | 3784 (32.0%) | 575 (31.3%) | 1879 (12.7%) | 7774 (14.5%) | 4120 (15.1%) | 8675 (28.0%) | 2097 (21.6%) |
| Uruguay | 45 (37.9%) | 18 (33.7%) | 9 (32.6%) | 74 (38.3%) | 103 (15.2%) | 50 (15.5%) | 39 (27.9%) | 35 (22.7%) |
| Uzbekistan | 126 (16.4%) | 17 (14.3%) | 12 (14.6%) | 182 (25.9%) | 36 (6.3%) | 47 (6.5%) | 109 (11.0%) | 10 (9.1%) |
| Vanuatu | 0 (3.9%) | 0 (0.0%) | 0 (0.0%) | 0 (0.0%) | 0 (1.6%) | 0 (1.8%) | 1 (4.1%) | 0 (3.6%) |
| Venezuela | 141 (34.1%) | 90 (30.2%) | 17 (29.7%) | 135 (38.6%) | 300 (13.6%) | 155 (14.2%) | 163 (21.7%) | 142 (20.1%) |
| Viet Nam | 454 (23.9%) | 124 (21.2%) | 396 (20.3%) | 1190 (36.1%) | 378 (8.6%) | 417 (8.7%) | 4079 (21.5%) | 260 (13.9%) |
| Yemen | 3 (2.3%) | 0 (0.9%) | 0 (1.8%) | 7 (2.1%) | 3 (0.6%) | 2 (0.6%) | 6 (1.3%) | 3 (1.0%) |
| Zambia | 18 (22.8%) | 4 (22.8%) | 0 (0.0%) | 122 (37.8%) | 9 (8.9%) | 12 (9.7%) | 48 (18.1%) | 9 (12.9%) |
| Zimbabwe | 12 (18.9%) | 2 (16.5%) | 1 (18.9%) | 126 (29.8%) | 13 (7.1%) | 9 (7.0%) | 56 (15.9%) | 9 (10.9%) |

## High Body Mass Index

**Table 5.4.1.** Proportion and number of high body mass index-related cancer cases attributable to high body mass index, women and men, 30+ years

| **Country** | **Women** | | | **Men** | | |
| --- | --- | --- | --- | --- | --- | --- |
| **N** | **PAF high BMI** | **PAF all** | **N** | **PAF high BMI** | **PAF all** |
| Afghanistan | 203 | 2.8% | 0.1% | 25 | 0.7% | 0.0% |
| Albania | 187 | 8.6% | 0.5% | 102 | 7.7% | 0.3% |
| Algeria | 1297 | 5.5% | 0.3% | 306 | 3.8% | 0.1% |
| Angola | 168 | 3.0% | 0.1% | 13 | 0.5% | 0.0% |
| Argentina | 4331 | 10.3% | 0.5% | 2457 | 11.5% | 0.4% |
| Armenia | 381 | 12.8% | 0.7% | 119 | 7.3% | 0.3% |
| Australia | 4114 | 9.8% | 0.5% | 2463 | 12.1% | 0.3% |
| Austria | 901 | 7.3% | 0.4% | 648 | 9.6% | 0.3% |
| Azerbaijan | 512 | 9.2% | 0.5% | 223 | 6.3% | 0.3% |
| Bahamas | 47 | 13.8% | 0.8% | 9 | 7.3% | 0.2% |
| Bahrain | 26 | 4.8% | 0.3% | 10 | 5.3% | 0.2% |
| Bangladesh | 5 | 0.0% | 0.0% | 0 | 0.0% | 0.0% |
| Barbados | 51 | 14.1% | 0.8% | 12 | 6.9% | 0.2% |
| Belarus | 1835 | 12.9% | 0.7% | 660 | 8.0% | 0.3% |
| Belgium | 1841 | 9.0% | 0.5% | 1080 | 10.9% | 0.3% |
| Belize | 14 | 10.9% | 0.6% | 4 | 8.3% | 0.2% |
| Benin | 93 | 3.9% | 0.2% | 14 | 1.1% | 0.0% |
| Bhutan | 3 | 2.4% | 0.1% | 3 | 1.7% | 0.1% |
| Bolivia | 479 | 10.1% | 0.4% | 124 | 5.4% | 0.2% |
| Bosnia Herzegovina | 325 | 8.3% | 0.4% | 183 | 7.5% | 0.3% |
| Botswana | 35 | 7.6% | 0.2% | 2 | 0.9% | 0.0% |
| Brazil | 14588 | 8.4% | 0.4% | 4784 | 6.1% | 0.2% |
| Brunei Darussalam | 23 | 7.5% | 0.4% | 11 | 6.6% | 0.3% |
| Bulgaria | 930 | 9.8% | 0.5% | 475 | 8.2% | 0.3% |
| Burkina Faso | 8 | 0.2% | 0.0% | 7 | 0.3% | 0.0% |
| Burundi | 0 | 0.0% | 0.0% | 1 | 0.1% | 0.0% |
| Cambodia | 22 | 0.4% | 0.0% | 5 | 0.1% | 0.0% |
| Cameroon | 222 | 3.7% | 0.2% | 46 | 2.6% | 0.1% |
| Canada | 7255 | 11.1% | 0.5% | 4024 | 12.2% | 0.4% |
| Cape Verde | 5 | 4.5% | 0.2% | 1 | 2.3% | 0.1% |
| Central African Republic | 19 | 2.0% | 0.1% | 1 | 0.3% | 0.0% |
| Chad | 3 | 0.1% | 0.0% | 13 | 0.9% | 0.0% |
| Chile | 1905 | 11.2% | 0.6% | 1118 | 9.7% | 0.4% |
| China | 40449 | 3.7% | 0.1% | 37941 | 3.4% | 0.2% |
| Colombia | 3046 | 8.4% | 0.4% | 877 | 5.4% | 0.2% |
| Comoros | 5 | 3.7% | 0.1% | 1 | 1.5% | 0.0% |
| Congo, Democratic Republic of | 97 | 0.7% | 0.0% | 0 | 0.0% | 0.0% |
| Congo, Republic of | 24 | 2.7% | 0.1% | 2 | 0.6% | 0.0% |
| Costa Rica | 361 | 10.5% | 0.5% | 112 | 5.9% | 0.2% |
| Croatia | 857 | 11.1% | 0.6% | 485 | 10.1% | 0.4% |
| Cuba | 1167 | 9.2% | 0.5% | 289 | 5.2% | 0.1% |
| Cyprus | 200 | 10.8% | 0.6% | 77 | 10.3% | 0.3% |
| Czechia | 2151 | 12.4% | 0.6% | 1247 | 12.6% | 0.4% |
| C�te d'Ivoire | 178 | 2.9% | 0.1% | 53 | 2.4% | 0.1% |
| Denmark | 718 | 6.1% | 0.3% | 656 | 9.4% | 0.3% |
| Djibouti | 11 | 3.8% | 0.2% | 2 | 2.6% | 0.1% |
| Dominican Republic | 403 | 7.0% | 0.4% | 132 | 5.5% | 0.1% |
| Ecuador | 837 | 9.1% | 0.4% | 254 | 6.0% | 0.2% |
| Egypt | 7102 | 14.1% | 0.8% | 4095 | 15.0% | 0.6% |
| El Salvador | 268 | 8.4% | 0.4% | 77 | 6.6% | 0.2% |
| Equatorial Guinea | 11 | 4.3% | 0.2% | 1 | 0.5% | 0.0% |
| Eritrea | 0 | 0.0% | 0.0% | 0 | 0.0% | 0.0% |
| Estonia | 249 | 10.2% | 0.6% | 107 | 8.6% | 0.3% |
| Eswatini | 14 | 8.1% | 0.2% | 2 | 4.3% | 0.1% |
| Ethiopia | 0 | 0.0% | 0.0% | 0 | 0.0% | 0.0% |
| Fiji | 61 | 11.7% | 0.5% | 14 | 8.3% | 0.2% |
| Finland | 1101 | 10.3% | 0.5% | 499 | 10.3% | 0.3% |
| France (metropolitan) | 9293 | 7.3% | 0.4% | 6439 | 10.0% | 0.3% |
| France, Guadeloupe | 0 | 0.0% | 0.0% | 0 | 0.0% | 0.0% |
| France, La R�union | 0 | 0.0% | 0.0% | 0 | 0.0% | 0.0% |
| France, Martinique | 0 | 0.0% | 0.0% | 0 | 0.0% | 0.0% |
| French Guyana | 0 | 0.0% | 0.0% | 0 | 0.0% | 0.0% |
| French Polynesia | 25 | 11.2% | 0.5% | 14 | 12.3% | 0.3% |
| Gabon | 38 | 6.4% | 0.3% | 9 | 3.7% | 0.1% |
| Gaza Strip and West Bank | 0 | 0.0% | 0.0% | 0 | 0.0% | 0.0% |
| Georgia | 499 | 12.5% | 0.7% | 175 | 9.4% | 0.3% |
| Germany | 16194 | 10.5% | 0.5% | 9744 | 12.0% | 0.4% |
| Ghana | 419 | 4.5% | 0.2% | 46 | 1.1% | 0.0% |
| Greece | 2241 | 11.9% | 0.7% | 1060 | 11.0% | 0.3% |
| Guam | 0 | 0.0% | 0.0% | 0 | 0.0% | 0.0% |
| Guatemala | 367 | 6.4% | 0.3% | 119 | 4.6% | 0.2% |
| Guinea | 44 | 2.3% | 0.1% | 11 | 0.9% | 0.0% |
| Guinea-Bissau | 11 | 3.2% | 0.1% | 2 | 1.5% | 0.1% |
| Guyana | 40 | 10.7% | 0.5% | 5 | 4.5% | 0.1% |
| Haiti | 80 | 2.1% | 0.1% | 106 | 5.7% | 0.2% |
| Honduras | 198 | 7.7% | 0.3% | 67 | 4.7% | 0.2% |
| Hungary | 1983 | 11.1% | 0.5% | 1082 | 10.5% | 0.4% |
| Iceland | 43 | 8.9% | 0.4% | 28 | 11.1% | 0.4% |
| India | 1431 | 0.4% | 0.0% | 88 | 0.0% | 0.0% |
| Indonesia | 2768 | 2.4% | 0.1% | 295 | 0.6% | 0.0% |
| Iran, Islamic Republic of | 2372 | 6.3% | 0.3% | 1390 | 5.0% | 0.2% |
| Iraq | 1337 | 10.0% | 0.5% | 377 | 9.7% | 0.3% |
| Ireland | 775 | 10.3% | 0.5% | 506 | 12.5% | 0.4% |
| Israel | 1042 | 11.2% | 0.6% | 438 | 11.2% | 0.3% |
| Italy | 10398 | 8.3% | 0.4% | 6449 | 9.7% | 0.3% |
| Jamaica | 358 | 14.0% | 0.8% | 44 | 4.6% | 0.1% |
| Japan | 2488 | 0.9% | 0.0% | 4735 | 1.9% | 0.1% |
| Jordan | 479 | 11.1% | 0.6% | 157 | 10.4% | 0.3% |
| Kazakhstan | 1197 | 10.2% | 0.6% | 424 | 6.8% | 0.3% |
| Kenya | 495 | 3.2% | 0.1% | 16 | 0.3% | 0.0% |
| Korea, Democratic People Republic of | 598 | 3.4% | 0.2% | 520 | 3.5% | 0.2% |
| Korea, Republic of | 1597 | 2.5% | 0.1% | 1634 | 2.7% | 0.1% |
| Kuwait | 192 | 13.3% | 0.7% | 81 | 12.8% | 0.4% |
| Kyrgyzstan | 213 | 9.3% | 0.5% | 91 | 6.1% | 0.3% |
| Lao People's Democratic Republic | 32 | 1.3% | 0.1% | 17 | 0.8% | 0.0% |
| Latvia | 409 | 12.0% | 0.6% | 149 | 9.1% | 0.3% |
| Lebanon | 380 | 10.6% | 0.5% | 150 | 10.4% | 0.3% |
| Lesotho | 27 | 7.0% | 0.2% | 2 | 1.1% | 0.0% |
| Liberia | 48 | 4.3% | 0.2% | 13 | 2.6% | 0.1% |
| Libya | 234 | 9.5% | 0.5% | 105 | 9.6% | 0.3% |
| Lithuania | 557 | 12.1% | 0.7% | 217 | 9.0% | 0.3% |
| Luxembourg | 80 | 8.5% | 0.5% | 45 | 11.6% | 0.3% |
| Madagascar | 0 | 0.0% | 0.0% | 0 | 0.0% | 0.0% |
| Malawi | 28 | 0.8% | 0.0% | 5 | 0.3% | 0.0% |
| Malaysia | 1115 | 6.4% | 0.3% | 419 | 4.9% | 0.2% |
| Maldives | 9 | 6.4% | 0.3% | 3 | 4.3% | 0.1% |
| Mali | 52 | 1.1% | 0.0% | 25 | 1.1% | 0.1% |
| Malta | 99 | 12.3% | 0.6% | 45 | 11.5% | 0.3% |
| Mauritania | 67 | 6.3% | 0.3% | 11 | 2.4% | 0.1% |
| Mauritius | 97 | 8.9% | 0.5% | 18 | 4.1% | 0.2% |
| Mexico | 6829 | 10.4% | 0.5% | 2563 | 9.4% | 0.3% |
| Moldova | 527 | 13.0% | 0.7% | 215 | 8.2% | 0.3% |
| Mongolia | 201 | 8.5% | 0.5% | 195 | 7.5% | 0.6% |
| Montenegro | 80 | 10.5% | 0.5% | 29 | 9.1% | 0.3% |
| Morocco | 1387 | 6.7% | 0.4% | 319 | 4.9% | 0.1% |
| Mozambique | 66 | 1.4% | 0.0% | 1 | 0.1% | 0.0% |
| Myanmar | 352 | 1.7% | 0.1% | 55 | 0.4% | 0.0% |
| Namibia | 47 | 5.7% | 0.2% | 4 | 1.7% | 0.0% |
| Nepal | 22 | 0.4% | 0.0% | 20 | 0.7% | 0.0% |
| New Caledonia | 0 | 0.0% | 0.0% | 0 | 0.0% | 0.0% |
| New Zealand | 773 | 10.0% | 0.5% | 472 | 11.5% | 0.4% |
| Nicaragua | 256 | 9.6% | 0.5% | 84 | 6.9% | 0.3% |
| Niger | 15 | 0.4% | 0.0% | 0 | 0.0% | 0.0% |
| Nigeria | 1371 | 3.0% | 0.1% | 89 | 0.9% | 0.0% |
| North Macedonia | 209 | 9.2% | 0.5% | 91 | 7.8% | 0.3% |
| Norway | 926 | 9.1% | 0.4% | 579 | 10.7% | 0.3% |
| Oman | 46 | 5.0% | 0.2% | 58 | 6.9% | 0.3% |
| Pakistan | 2256 | 4.0% | 0.2% | 356 | 1.7% | 0.0% |
| Panama | 254 | 10.0% | 0.5% | 67 | 5.9% | 0.2% |
| Papua New Guinea | 170 | 5.4% | 0.2% | 65 | 4.8% | 0.1% |
| Paraguay | 288 | 7.6% | 0.4% | 126 | 7.2% | 0.2% |
| Peru | 1512 | 7.7% | 0.3% | 588 | 6.0% | 0.2% |
| Philippines | 1490 | 2.3% | 0.1% | 340 | 1.2% | 0.0% |
| Poland | 6771 | 11.4% | 0.6% | 2668 | 8.7% | 0.3% |
| Portugal | 1571 | 8.0% | 0.4% | 995 | 7.8% | 0.3% |
| Puerto Rico | 504 | 12.7% | 0.7% | 205 | 10.4% | 0.3% |
| Qatar | 42 | 9.9% | 0.5% | 33 | 11.5% | 0.3% |
| Romania | 2868 | 10.3% | 0.5% | 1591 | 9.1% | 0.3% |
| Russian Federation | 26675 | 12.2% | 0.7% | 7985 | 7.7% | 0.3% |
| Rwanda | 6 | 0.3% | 0.0% | 0 | 0.0% | 0.0% |
| Saint Lucia | 13 | 10.9% | 0.6% | 5 | 9.3% | 0.2% |
| Samoa | 31 | 20.9% | 1.2% | 9 | 14.4% | 0.5% |
| Sao Tome and Principe | 2 | 5.6% | 0.3% | 1 | 2.5% | 0.1% |
| Saudi Arabia | 865 | 11.3% | 0.5% | 553 | 10.4% | 0.4% |
| Senegal | 121 | 3.3% | 0.1% | 8 | 0.5% | 0.0% |
| Serbia | 1078 | 9.7% | 0.5% | 468 | 7.2% | 0.2% |
| Sierra Leone | 8 | 1.7% | 0.1% | 1 | 0.2% | 0.0% |
| Singapore | 290 | 3.6% | 0.2% | 230 | 4.2% | 0.2% |
| Slovakia | 957 | 10.9% | 0.6% | 504 | 10.1% | 0.4% |
| Slovenia | 352 | 9.6% | 0.5% | 178 | 8.1% | 0.3% |
| Solomon Islands | 17 | 7.9% | 0.4% | 4 | 6.5% | 0.2% |
| Somalia | 93 | 2.7% | 0.1% | 8 | 0.7% | 0.0% |
| South Africa | 3144 | 11.4% | 0.5% | 544 | 4.9% | 0.1% |
| South Sudan | 0 | 0.0% | 0.0% | 0 | 0.0% | 0.0% |
| Spain | 6523 | 8.7% | 0.5% | 4813 | 10.3% | 0.4% |
| Sri Lanka | 252 | 2.6% | 0.1% | 15 | 0.4% | 0.0% |
| Sudan | 573 | 5.4% | 0.3% | 92 | 3.0% | 0.1% |
| Suriname | 25 | 8.1% | 0.4% | 8 | 5.8% | 0.2% |
| Sweden | 1330 | 8.1% | 0.4% | 861 | 10.1% | 0.3% |
| Switzerland | 794 | 5.9% | 0.3% | 743 | 10.8% | 0.3% |
| Syrian Arab Republic | 826 | 11.3% | 0.6% | 234 | 10.0% | 0.3% |
| Tajikistan | 130 | 6.4% | 0.3% | 61 | 4.7% | 0.2% |
| Tanzania, United Republic of | 220 | 2.4% | 0.1% | 26 | 0.5% | 0.0% |
| Thailand | 2626 | 4.8% | 0.2% | 950 | 2.4% | 0.1% |
| The Netherlands | 2537 | 7.8% | 0.4% | 1833 | 9.8% | 0.3% |
| The Republic of the Gambia | 8 | 3.1% | 0.1% | 5 | 1.9% | 0.1% |
| Timor-Leste | 0 | 0.0% | 0.0% | 0 | 0.0% | 0.0% |
| Togo | 60 | 3.6% | 0.2% | 5 | 0.7% | 0.0% |
| Trinidad and Tobago | 174 | 13.5% | 0.7% | 37 | 7.7% | 0.2% |
| Tunisia | 448 | 8.2% | 0.4% | 144 | 6.3% | 0.1% |
| Turkmenistan | 159 | 7.4% | 0.4% | 83 | 6.9% | 0.3% |
| T�rkiye | 8025 | 13.1% | 0.6% | 3078 | 9.1% | 0.3% |
| Uganda | 86 | 1.2% | 0.0% | 0 | 0.0% | 0.0% |
| Ukraine | 5483 | 10.7% | 0.6% | 1966 | 7.7% | 0.3% |
| United Arab Emirates | 206 | 11.5% | 0.6% | 69 | 9.6% | 0.3% |
| United Kingdom | 12584 | 10.5% | 0.5% | 7386 | 12.3% | 0.4% |
| United States of America | 77045 | 14.6% | 0.7% | 36719 | 15.3% | 0.4% |
| Uruguay | 538 | 10.8% | 0.6% | 276 | 10.3% | 0.4% |
| Uzbekistan | 935 | 8.2% | 0.4% | 391 | 6.5% | 0.3% |
| Vanuatu | 5 | 8.4% | 0.3% | 3 | 7.9% | 0.3% |
| Venezuela | 1513 | 8.9% | 0.4% | 660 | 7.6% | 0.3% |
| Viet Nam | 45 | 0.1% | 0.0% | 0 | 0.0% | 0.0% |
| Yemen | 96 | 1.8% | 0.1% | 58 | 2.4% | 0.1% |
| Zambia | 52 | 2.3% | 0.0% | 0 | 0.0% | 0.0% |
| Zimbabwe | 262 | 5.9% | 0.2% | 8 | 0.5% | 0.0% |

**Table 5.4.2.** Proportion and number of cancer cases by cancer site attributable to high body mass index, women, 30+ years, 2022

| **Country** | **Oesophagus** | **Stomach** | **Colon** | **Rectum** | **Liver and intrahepatic bile ducts** | **Gallbladder** | **Pancreas** | **Breast** | **Corpus uteri** | **Ovary** | **Kidney** | **Multiple myeloma** |
| --- | --- | --- | --- | --- | --- | --- | --- | --- | --- | --- | --- | --- |
|  | **N (PAF)** | **N (PAF)** | **N (PAF)** | **N (PAF)** | **N (PAF)** | **N (PAF)** | **N (PAF)** | **N (PAF)** | **N (PAF)** | **N (PAF)** | **N (PAF)** | **N (PAF)** |
| Afghanistan | 2 (0.6%) | 10 (1.3%) | 4 (1.4%) | 1 (0.3%) | 11 (3.0%) | 8 (7.6%) | 5 (3.3%) | 77 (2.2%) | 64 (12.7%) | 8 (1.6%) | 11 (5.4%) | 1 (2.2%) |
| Albania | 1 (6.4%) | 3 (1.3%) | 4 (3.9%) | 1 (1.0%) | 7 (9.9%) | 2 (18.9%) | 10 (9.2%) | 74 (7.2%) | 63 (28.0%) | 10 (5.3%) | 9 (18.4%) | 2 (5.9%) |
| Algeria | 10 (6.9%) | 7 (0.7%) | 69 (3.2%) | 12 (0.8%) | 14 (4.1%) | 133 (15.7%) | 33 (7.1%) | 743 (5.1%) | 161 (27.1%) | 55 (4.8%) | 44 (14.0%) | 17 (4.7%) |
| Angola | 5 (1.9%) | 4 (1.0%) | 4 (1.5%) | 1 (0.3%) | 23 (5.4%) | 2 (8.9%) | 4 (4.3%) | 73 (2.5%) | 47 (13.0%) | 3 (0.8%) | 2 (0.6%) | 2 (2.7%) |
| Argentina | 57 (8.1%) | 21 (1.3%) | 273 (4.8%) | 16 (1.2%) | 75 (7.8%) | 129 (22.1%) | 314 (11.0%) | 2028 (9.4%) | 896 (33.4%) | 142 (6.5%) | 346 (23.1%) | 34 (7.1%) |
| Armenia | 1 (7.0%) | 9 (3.7%) | 26 (5.4%) | 2 (1.4%) | 29 (12.6%) | 10 (24.7%) | 26 (12.3%) | 116 (11.5%) | 130 (35.2%) | 9 (7.0%) | 21 (25.5%) | 1 (7.7%) |
| Australia | 43 (9.2%) | 41 (3.8%) | 225 (3.9%) | 21 (1.0%) | 83 (9.4%) | 47 (19.8%) | 199 (9.6%) | 2017 (9.2%) | 1023 (30.5%) | 104 (5.8%) | 246 (20.6%) | 65 (6.1%) |
| Austria | 8 (7.8%) | 7 (1.5%) | 37 (2.9%) | 4 (0.8%) | 18 (5.9%) | 16 (15.2%) | 76 (7.1%) | 394 (6.6%) | 219 (22.7%) | 31 (4.1%) | 80 (15.3%) | 12 (4.5%) |
| Azerbaijan | 34 (6.9%) | 21 (3.5%) | 27 (5.0%) | 4 (1.3%) | 42 (11.9%) | 10 (22.9%) | 18 (11.3%) | 188 (8.6%) | 121 (35.5%) | 23 (5.9%) | 21 (20.0%) | 4 (6.9%) |
| Bahamas | 0 (18.5%) | 0 (1.6%) | 2 (5.4%) | 0 (1.4%) | 1 (11.1%) | 1 (26.6%) | 1 (12.2%) | 17 (9.6%) | 22 (38.7%) | 2 (7.4%) | 0 (24.0%) | 1 (8.0%) |
| Bahrain | 0 (3.9%) | 0 (1.1%) | 1 (2.0%) | 0 (0.5%) | 0 (3.0%) | 1 (11.6%) | 1 (4.8%) | 12 (3.8%) | 8 (18.3%) | 1 (3.0%) | 1 (12.3%) | 0 (3.3%) |
| Bangladesh | 0 (0.0%) | 0 (0.0%) | 0 (0.0%) | 0 (0.0%) | 0 (0.0%) | 2 (0.0%) | 0 (0.0%) | 0 (0.0%) | 1 (0.1%) | 0 (0.0%) | 0 (0.0%) | 0 (0.0%) |
| Barbados | 0 (10.1%) | 0 (2.2%) | 2 (4.9%) | 0 (1.3%) | 1 (8.4%) | 1 (25.5%) | 2 (11.6%) | 15 (10.0%) | 26 (37.5%) | 2 (7.4%) | 1 (25.9%) | 1 (7.5%) |
| Belarus | 5 (9.3%) | 13 (1.2%) | 100 (5.2%) | 14 (1.4%) | 19 (10.2%) | 33 (24.3%) | 69 (11.7%) | 561 (10.8%) | 783 (34.1%) | 45 (6.1%) | 176 (23.9%) | 15 (7.4%) |
| Belgium | 27 (9.1%) | 17 (3.3%) | 103 (3.8%) | 8 (1.0%) | 41 (9.5%) | 11 (18.9%) | 103 (9.0%) | 937 (8.3%) | 398 (28.5%) | 44 (5.3%) | 125 (18.9%) | 27 (5.6%) |
| Belize | 0 (0.0%) | 0 (0.0%) | 1 (5.6%) | 0 (0.0%) | 1 (10.8%) | 0 (28.0%) | 1 (11.9%) | 9 (10.8%) | 1 (42.8%) | 0 (5.8%) | 1 (28.4%) | 0 (0.0%) |
| Benin | 1 (1.2%) | 1 (0.8%) | 2 (1.5%) | 0 (0.4%) | 9 (4.4%) | 1 (5.1%) | 3 (3.1%) | 43 (3.3%) | 26 (15.2%) | 3 (2.5%) | 3 (7.8%) | 1 (2.8%) |
| Bhutan | 0 (0.6%) | 0 (1.1%) | 0 (1.5%) | 0 (0.4%) | 0 (3.9%) | 1 (7.8%) | 0 (2.5%) | 0 (2.2%) | 1 (15.8%) | 0 (2.2%) | 0 (0.0%) | 0 (0.0%) |
| Bolivia | 3 (6.0%) | 5 (1.1%) | 10 (4.0%) | 1 (1.1%) | 39 (8.1%) | 109 (18.2%) | 18 (8.7%) | 87 (5.2%) | 161 (29.8%) | 10 (5.7%) | 34 (17.8%) | 1 (6.7%) |
| Bosnia Herzegovina | 1 (6.7%) | 3 (1.2%) | 16 (3.7%) | 3 (0.9%) | 20 (9.4%) | 14 (18.1%) | 20 (8.5%) | 120 (7.8%) | 92 (25.8%) | 13 (4.6%) | 20 (17.9%) | 2 (5.5%) |
| Botswana | 2 (3.7%) | 0 (3.3%) | 1 (3.2%) | 0 (0.8%) | 2 (11.4%) | 0 (0.0%) | 1 (7.8%) | 15 (5.9%) | 12 (28.2%) | 1 (4.7%) | 1 (12.4%) | 1 (5.6%) |
| Brazil | 115 (5.3%) | 84 (1.0%) | 648 (3.8%) | 109 (1.0%) | 421 (7.4%) | 297 (18.5%) | 636 (8.9%) | 7310 (7.7%) | 3667 (29.1%) | 393 (5.1%) | 759 (18.8%) | 148 (5.7%) |
| Brunei Darussalam | 0 (0.0%) | 0 (0.7%) | 1 (3.6%) | 0 (1.0%) | 1 (10.0%) | 0 (19.2%) | 1 (8.5%) | 9 (6.6%) | 7 (28.5%) | 2 (4.7%) | 2 (20.9%) | 0 (0.0%) |
| Bulgaria | 3 (6.9%) | 10 (1.8%) | 57 (4.1%) | 7 (1.1%) | 33 (11.9%) | 10 (19.6%) | 55 (9.3%) | 311 (8.7%) | 344 (29.0%) | 36 (5.4%) | 56 (19.8%) | 6 (5.9%) |
| Burkina Faso | 0 (0.0%) | 0 (0.0%) | 0 (0.1%) | 0 (0.0%) | 2 (0.2%) | 0 (0.0%) | 1 (0.3%) | 2 (0.1%) | 1 (0.4%) | 1 (0.1%) | 1 (0.4%) | 0 (0.2%) |
| Burundi | 0 (0.0%) | 0 (0.0%) | 0 (0.0%) | 0 (0.0%) | 0 (0.0%) | 0 (0.0%) | 0 (0.0%) | 0 (0.0%) | 0 (0.0%) | 0 (0.0%) | 0 (0.0%) | 0 (0.0%) |
| Cambodia | 0 (0.3%) | 0 (0.0%) | 1 (0.2%) | 0 (0.1%) | 6 (0.5%) | 0 (0.5%) | 0 (0.4%) | 8 (0.4%) | 5 (1.8%) | 1 (0.1%) | 0 (0.6%) | 0 (0.2%) |
| Cameroon | 1 (1.7%) | 3 (1.2%) | 5 (2.2%) | 1 (0.5%) | 17 (7.0%) | 2 (11.7%) | 3 (5.0%) | 132 (3.1%) | 39 (19.1%) | 15 (3.0%) | 3 (5.5%) | 2 (3.6%) |
| Canada | 107 (12.5%) | 52 (3.8%) | 291 (4.1%) | 30 (1.0%) | 156 (8.9%) | 65 (19.5%) | 319 (9.4%) | 3004 (9.4%) | 2395 (30.3%) | 186 (5.6%) | 528 (20.5%) | 121 (6.0%) |
| Cape Verde | 0 (4.3%) | 0 (0.0%) | 0 (2.4%) | 0 (0.7%) | 0 (11.9%) | 0 (0.0%) | 0 (7.0%) | 3 (3.8%) | 1 (23.3%) | 0 (3.7%) | 0 (10.6%) | 0 (3.3%) |
| Central African Republic | 0 (1.0%) | 0 (0.7%) | 0 (0.9%) | 0 (0.2%) | 2 (3.7%) | 0 (6.6%) | 0 (2.9%) | 10 (1.8%) | 3 (10.8%) | 1 (1.4%) | 1 (3.8%) | 0 (1.8%) |
| Chad | 0 (0.0%) | 0 (0.0%) | 0 (0.0%) | 0 (0.0%) | 1 (0.2%) | 0 (0.0%) | 0 (0.1%) | 1 (0.1%) | 0 (0.4%) | 0 (0.1%) | 0 (0.2%) | 0 (0.2%) |
| Chile | 10 (3.3%) | 58 (3.6%) | 125 (4.9%) | 10 (1.3%) | 90 (12.3%) | 304 (23.2%) | 115 (11.2%) | 563 (10.0%) | 360 (35.1%) | 64 (6.9%) | 178 (24.0%) | 27 (7.1%) |
| China | 784 (1.4%) | 1221 (1.1%) | 1947 (1.7%) | 401 (0.4%) | 5141 (5.2%) | 1566 (8.5%) | 2031 (3.9%) | 12771 (3.6%) | 10492 (13.5%) | 1374 (2.3%) | 2369 (9.0%) | 351 (2.6%) |
| Colombia | 19 (5.9%) | 30 (0.9%) | 154 (3.8%) | 13 (1.0%) | 111 (8.3%) | 90 (18.7%) | 131 (8.9%) | 1250 (7.3%) | 885 (29.1%) | 119 (5.3%) | 211 (18.8%) | 32 (5.8%) |
| Comoros | 0 (1.7%) | 0 (0.0%) | 0 (2.7%) | 0 (0.6%) | 1 (6.3%) | 0 (0.0%) | 0 (6.8%) | 2 (3.7%) | 1 (21.3%) | 0 (3.5%) | 0 (0.0%) | 0 (0.0%) |
| Congo, Democratic Republic of | 2 (0.4%) | 2 (0.2%) | 2 (0.3%) | 1 (0.1%) | 12 (1.1%) | 1 (1.8%) | 3 (0.9%) | 50 (0.7%) | 16 (3.5%) | 5 (0.4%) | 3 (0.8%) | 1 (0.6%) |
| Congo, Republic of | 0 (2.2%) | 1 (0.9%) | 1 (1.6%) | 0 (0.4%) | 2 (1.9%) | 0 (8.2%) | 1 (4.2%) | 15 (2.8%) | 3 (14.1%) | 1 (2.1%) | 0 (2.0%) | 0 (2.4%) |
| Costa Rica | 1 (6.6%) | 5 (1.2%) | 20 (4.5%) | 2 (1.2%) | 17 (9.0%) | 9 (21.5%) | 18 (10.2%) | 129 (9.6%) | 130 (33.8%) | 9 (6.0%) | 17 (22.4%) | 4 (6.8%) |
| Croatia | 2 (5.3%) | 7 (1.7%) | 50 (4.7%) | 7 (1.2%) | 17 (9.6%) | 26 (22.4%) | 44 (10.9%) | 323 (10.4%) | 276 (33.5%) | 30 (6.4%) | 60 (18.5%) | 12 (6.9%) |
| Cuba | 14 (8.0%) | 5 (0.9%) | 73 (3.2%) | 4 (0.9%) | 29 (6.1%) | 8 (15.1%) | 39 (7.5%) | 408 (7.9%) | 513 (25.7%) | 22 (4.5%) | 42 (16.7%) | 11 (5.0%) |
| Cyprus | 0 (13.2%) | 1 (2.5%) | 8 (4.7%) | 1 (1.2%) | 3 (6.5%) | 2 (23.6%) | 12 (11.3%) | 93 (9.2%) | 60 (32.2%) | 8 (6.4%) | 8 (23.3%) | 3 (6.8%) |
| Czechia | 15 (12.8%) | 11 (2.3%) | 105 (5.0%) | 12 (1.3%) | 31 (7.9%) | 56 (24.5%) | 149 (11.8%) | 828 (10.7%) | 588 (34.5%) | 63 (6.8%) | 269 (25.0%) | 22 (7.3%) |
| C�te d'Ivoire | 0 (1.0%) | 2 (0.8%) | 5 (1.6%) | 1 (0.4%) | 24 (5.8%) | 6 (8.2%) | 5 (3.4%) | 83 (2.1%) | 38 (13.3%) | 7 (2.2%) | 5 (3.8%) | 2 (2.2%) |
| Denmark | 12 (7.6%) | 9 (3.5%) | 58 (2.6%) | 5 (0.7%) | 12 (4.9%) | 7 (12.8%) | 43 (6.1%) | 310 (5.9%) | 179 (19.7%) | 16 (3.6%) | 57 (13.0%) | 10 (3.8%) |
| Djibouti | 0 (1.4%) | 0 (1.5%) | 0 (2.1%) | 0 (0.5%) | 1 (8.2%) | 0 (11.8%) | 0 (5.8%) | 5 (3.1%) | 2 (18.4%) | 1 (3.0%) | 1 (10.5%) | 0 (3.8%) |
| Dominican Republic | 8 (9.1%) | 4 (1.1%) | 31 (4.0%) | 1 (1.1%) | 30 (7.6%) | 6 (18.0%) | 26 (8.9%) | 221 (6.8%) | 54 (26.0%) | 9 (5.2%) | 10 (14.8%) | 5 (6.1%) |
| Ecuador | 6 (12.9%) | 5 (0.4%) | 39 (4.2%) | 4 (1.1%) | 69 (12.0%) | 28 (19.9%) | 43 (9.6%) | 311 (8.0%) | 251 (32.0%) | 29 (5.7%) | 47 (19.9%) | 8 (6.5%) |
| Egypt | 77 (11.2%) | 52 (3.2%) | 113 (6.1%) | 17 (1.6%) | 2483 (24.4%) | 121 (29.3%) | 196 (15.0%) | 2577 (9.6%) | 926 (45.2%) | 261 (8.5%) | 248 (26.1%) | 31 (9.7%) |
| El Salvador | 2 (5.6%) | 4 (1.2%) | 12 (4.1%) | 1 (1.1%) | 22 (8.2%) | 13 (20.3%) | 10 (9.6%) | 138 (8.5%) | 40 (32.4%) | 11 (5.8%) | 14 (21.4%) | 2 (6.3%) |
| Equatorial Guinea | 0 (0.0%) | 0 (2.1%) | 0 (2.4%) | 0 (0.6%) | 1 (9.3%) | 0 (15.2%) | 0 (6.3%) | 5 (2.9%) | 3 (22.3%) | 1 (3.5%) | 0 (4.1%) | 0 (4.6%) |
| Eritrea | 0 (0.0%) | 0 (0.0%) | 0 (0.0%) | 0 (0.0%) | 0 (0.0%) | 0 (0.0%) | 0 (0.0%) | 0 (0.0%) | 0 (0.0%) | 0 (0.0%) | 0 (0.0%) | 0 (0.0%) |
| Estonia | 1 (5.4%) | 4 (1.9%) | 16 (4.4%) | 2 (1.2%) | 3 (6.6%) | 4 (21.2%) | 18 (10.2%) | 82 (9.6%) | 76 (29.8%) | 8 (5.8%) | 31 (21.8%) | 4 (6.4%) |
| Eswatini | 0 (5.1%) | 0 (0.0%) | 0 (5.1%) | 0 (1.2%) | 2 (13.6%) | 0 (0.0%) | 0 (12.4%) | 9 (8.2%) | 1 (37.9%) | 1 (5.9%) | 0 (5.7%) | 0 (8.5%) |
| Ethiopia | 0 (0.0%) | 0 (0.0%) | 0 (0.0%) | 0 (0.0%) | 0 (0.0%) | 0 (0.0%) | 0 (0.0%) | 0 (0.0%) | 0 (0.0%) | 0 (0.0%) | 0 (0.0%) | 0 (0.0%) |
| Fiji | 0 (0.0%) | 1 (4.6%) | 1 (5.0%) | 0 (1.4%) | 3 (11.2%) | 1 (24.7%) | 1 (11.2%) | 24 (8.4%) | 25 (37.6%) | 3 (6.1%) | 1 (18.7%) | 0 (8.1%) |
| Finland | 9 (8.4%) | 6 (2.4%) | 54 (4.1%) | 6 (1.1%) | 20 (8.8%) | 11 (19.6%) | 75 (9.7%) | 517 (9.6%) | 274 (30.1%) | 25 (5.6%) | 90 (20.7%) | 13 (6.1%) |
| France (metropolitan) | 59 (4.8%) | 62 (2.4%) | 492 (3.1%) | 57 (0.8%) | 249 (7.2%) | 59 (15.2%) | 578 (7.2%) | 4342 (6.6%) | 2279 (23.3%) | 245 (4.3%) | 756 (14.3%) | 113 (4.5%) |
| France, Guadeloupe | 0 (0.0%) | 0 (0.0%) | 0 (0.0%) | 0 (0.0%) | 0 (0.0%) | 0 (0.0%) | 0 (0.0%) | 0 (0.0%) | 0 (0.0%) | 0 (0.0%) | 0 (0.0%) | 0 (0.0%) |
| France, La R�union | 0 (0.0%) | 0 (0.0%) | 0 (0.0%) | 0 (0.0%) | 0 (0.0%) | 0 (0.0%) | 0 (0.0%) | 0 (0.0%) | 0 (0.0%) | 0 (0.0%) | 0 (0.0%) | 0 (0.0%) |
| France, Martinique | 0 (0.0%) | 0 (0.0%) | 0 (0.0%) | 0 (0.0%) | 0 (0.0%) | 0 (0.0%) | 0 (0.0%) | 0 (0.0%) | 0 (0.0%) | 0 (0.0%) | 0 (0.0%) | 0 (0.0%) |
| French Guyana | 0 (0.0%) | 0 (0.0%) | 0 (0.0%) | 0 (0.0%) | 0 (0.0%) | 0 (0.0%) | 0 (0.0%) | 0 (0.0%) | 0 (0.0%) | 0 (0.0%) | 0 (0.0%) | 0 (0.0%) |
| French Polynesia | 0 (0.0%) | 0 (2.8%) | 0 (4.9%) | 0 (1.2%) | 1 (11.5%) | 1 (21.6%) | 0 (8.5%) | 13 (9.3%) | 7 (38.3%) | 1 (7.8%) | 0 (28.5%) | 0 (7.4%) |
| Gabon | 0 (2.1%) | 0 (2.1%) | 1 (3.2%) | 0 (0.9%) | 6 (10.6%) | 1 (17.3%) | 2 (7.4%) | 14 (4.4%) | 8 (26.8%) | 3 (4.5%) | 2 (11.2%) | 0 (5.7%) |
| Gaza Strip and West Bank | 0 (0.0%) | 0 (0.0%) | 0 (0.0%) | 0 (0.0%) | 0 (0.0%) | 0 (0.0%) | 0 (0.0%) | 0 (0.0%) | 0 (0.0%) | 0 (0.0%) | 0 (0.0%) | 0 (0.0%) |
| Georgia | 2 (7.5%) | 12 (3.7%) | 14 (5.4%) | 3 (1.4%) | 19 (12.7%) | 19 (24.8%) | 30 (12.3%) | 196 (11.3%) | 154 (37.0%) | 28 (7.3%) | 19 (22.1%) | 3 (7.7%) |
| Germany | 180 (10.6%) | 170 (3.0%) | 812 (4.4%) | 108 (1.1%) | 302 (9.3%) | 239 (20.9%) | 1092 (10.0%) | 7357 (9.9%) | 3605 (30.6%) | 451 (6.0%) | 1672 (22.1%) | 205 (6.5%) |
| Ghana | 6 (2.2%) | 6 (1.3%) | 3 (2.2%) | 1 (0.6%) | 71 (6.6%) | 2 (11.3%) | 11 (6.2%) | 179 (3.6%) | 94 (19.4%) | 37 (3.1%) | 6 (4.3%) | 3 (3.6%) |
| Greece | 4 (8.1%) | 11 (1.5%) | 144 (5.0%) | 7 (1.3%) | 69 (12.0%) | 12 (23.6%) | 123 (11.4%) | 977 (10.9%) | 651 (33.4%) | 64 (6.6%) | 151 (24.1%) | 27 (7.3%) |
| Guam | 0 (0.0%) | 0 (0.0%) | 0 (0.0%) | 0 (0.0%) | 0 (0.0%) | 0 (0.0%) | 0 (0.0%) | 0 (0.0%) | 0 (0.0%) | 0 (0.0%) | 0 (0.0%) | 0 (0.0%) |
| Guatemala | 3 (4.7%) | 11 (1.0%) | 15 (3.5%) | 0 (1.0%) | 84 (7.4%) | 6 (17.9%) | 15 (8.5%) | 143 (6.4%) | 53 (28.7%) | 12 (4.9%) | 23 (18.3%) | 1 (5.8%) |
| Guinea | 0 (0.8%) | 1 (0.6%) | 0 (0.9%) | 0 (0.2%) | 21 (3.2%) | 0 (0.8%) | 1 (2.3%) | 13 (1.8%) | 6 (9.1%) | 2 (1.0%) | 1 (2.0%) | 0 (1.2%) |
| Guinea-Bissau | 0 (3.6%) | 0 (1.1%) | 0 (1.6%) | 0 (0.4%) | 3 (4.9%) | 0 (0.0%) | 0 (4.6%) | 5 (2.4%) | 2 (14.5%) | 1 (1.9%) | 0 (6.0%) | 0 (2.9%) |
| Guyana | 0 (0.0%) | 0 (1.0%) | 1 (4.3%) | 0 (1.2%) | 1 (9.6%) | 1 (22.1%) | 1 (10.5%) | 21 (9.0%) | 11 (33.9%) | 1 (6.9%) | 2 (24.9%) | 0 (7.2%) |
| Haiti | 3 (2.8%) | 1 (0.3%) | 5 (1.0%) | 0 (0.4%) | 8 (1.9%) | 4 (6.4%) | 3 (2.3%) | 28 (2.1%) | 17 (11.5%) | 5 (1.8%) | 3 (2.8%) | 2 (2.2%) |
| Honduras | 2 (4.0%) | 2 (1.1%) | 7 (3.9%) | 1 (1.0%) | 12 (7.5%) | 20 (19.0%) | 12 (9.1%) | 84 (6.9%) | 34 (31.2%) | 9 (4.8%) | 12 (13.5%) | 3 (6.0%) |
| Hungary | 9 (8.7%) | 19 (2.6%) | 125 (4.6%) | 15 (1.2%) | 44 (13.9%) | 31 (22.2%) | 137 (10.7%) | 790 (10.3%) | 565 (33.0%) | 61 (6.0%) | 174 (22.2%) | 14 (6.7%) |
| Iceland | 1 (8.4%) | 0 (1.2%) | 3 (3.4%) | 0 (0.9%) | 1 (7.4%) | 1 (16.8%) | 2 (8.1%) | 15 (7.5%) | 14 (25.4%) | 1 (5.1%) | 4 (17.7%) | 1 (5.1%) |
| India | 18 (0.1%) | 27 (0.1%) | 19 (0.2%) | 5 (0.0%) | 37 (0.3%) | 122 (0.8%) | 19 (0.4%) | 730 (0.4%) | 280 (1.6%) | 104 (0.2%) | 53 (0.8%) | 16 (0.2%) |
| Indonesia | 5 (1.5%) | 1 (0.2%) | 76 (1.0%) | 15 (0.3%) | 131 (2.4%) | 11 (5.0%) | 49 (1.9%) | 1357 (2.0%) | 830 (9.9%) | 239 (1.6%) | 41 (5.9%) | 13 (1.1%) |
| Iran, Islamic Republic of | 29 (1.8%) | 317 (5.0%) | 157 (4.1%) | 16 (1.1%) | 123 (4.6%) | 49 (19.7%) | 123 (9.5%) | 832 (5.4%) | 439 (30.6%) | 107 (5.3%) | 149 (19.6%) | 30 (6.1%) |
| Iraq | 10 (6.8%) | 21 (3.5%) | 31 (5.4%) | 6 (1.4%) | 50 (12.6%) | 27 (26.2%) | 33 (12.7%) | 724 (8.4%) | 268 (39.0%) | 70 (7.0%) | 83 (22.0%) | 15 (8.1%) |
| Ireland | 17 (9.9%) | 10 (5.5%) | 36 (4.3%) | 5 (1.1%) | 12 (5.3%) | 13 (20.6%) | 32 (9.9%) | 329 (8.9%) | 221 (31.5%) | 27 (6.1%) | 63 (21.2%) | 11 (6.3%) |
| Israel | 4 (6.9%) | 8 (2.3%) | 56 (4.7%) | 4 (1.2%) | 17 (10.1%) | 13 (23.0%) | 64 (11.2%) | 452 (9.8%) | 311 (34.0%) | 31 (6.4%) | 64 (22.7%) | 18 (7.0%) |
| Italy | 47 (6.3%) | 61 (1.1%) | 669 (3.6%) | 58 (0.9%) | 385 (10.1%) | 134 (17.5%) | 693 (8.4%) | 4515 (7.9%) | 2574 (25.2%) | 279 (4.6%) | 822 (18.0%) | 161 (5.3%) |
| Jamaica | 2 (11.3%) | 1 (1.4%) | 12 (5.1%) | 1 (1.3%) | 5 (9.3%) | 8 (24.6%) | 8 (11.7%) | 116 (8.8%) | 189 (38.2%) | 7 (7.0%) | 4 (18.6%) | 4 (7.7%) |
| Japan | 10 (0.2%) | 49 (0.1%) | 192 (0.4%) | 18 (0.1%) | 198 (1.6%) | 132 (2.1%) | 233 (1.0%) | 884 (1.0%) | 559 (3.1%) | 55 (0.5%) | 139 (2.2%) | 19 (0.6%) |
| Jordan | 2 (7.7%) | 3 (2.2%) | 27 (6.1%) | 3 (1.6%) | 9 (10.6%) | 13 (29.1%) | 16 (14.2%) | 239 (9.2%) | 117 (43.2%) | 19 (7.8%) | 23 (25.4%) | 7 (9.3%) |
| Kazakhstan | 8 (2.0%) | 38 (3.1%) | 43 (4.5%) | 9 (1.2%) | 51 (10.6%) | 18 (21.4%) | 62 (10.4%) | 422 (9.2%) | 409 (31.7%) | 52 (5.6%) | 80 (21.1%) | 5 (6.5%) |
| Kenya | 26 (1.5%) | 9 (0.9%) | 15 (1.6%) | 2 (0.4%) | 21 (5.1%) | 27 (8.9%) | 19 (3.9%) | 206 (2.9%) | 116 (14.0%) | 30 (2.4%) | 13 (4.5%) | 11 (2.4%) |
| Korea, Democratic People Republic of | 3 (1.1%) | 15 (0.8%) | 27 (1.6%) | 7 (0.4%) | 99 (4.9%) | 43 (7.8%) | 33 (3.5%) | 190 (3.2%) | 115 (13.2%) | 25 (2.2%) | 39 (8.4%) | 3 (2.4%) |
| Korea, Republic of | 2 (0.7%) | 20 (0.2%) | 107 (1.4%) | 14 (0.3%) | 143 (4.1%) | 117 (7.1%) | 147 (3.2%) | 583 (2.4%) | 300 (9.0%) | 45 (1.6%) | 100 (6.9%) | 21 (2.1%) |
| Kuwait | 1 (12.0%) | 1 (4.3%) | 8 (6.4%) | 1 (1.7%) | 5 (16.1%) | 4 (29.7%) | 6 (14.9%) | 95 (10.7%) | 54 (44.3%) | 7 (8.6%) | 7 (27.5%) | 2 (9.4%) |
| Kyrgyzstan | 1 (1.8%) | 12 (4.1%) | 5 (4.7%) | 1 (1.2%) | 16 (10.0%) | 9 (22.3%) | 14 (10.9%) | 64 (7.6%) | 64 (27.8%) | 14 (5.6%) | 12 (20.3%) | 1 (6.8%) |
| Lao People's Democratic Republic | 0 (1.3%) | 0 (0.1%) | 1 (0.6%) | 0 (0.2%) | 8 (1.9%) | 1 (3.0%) | 1 (1.5%) | 12 (1.2%) | 6 (6.5%) | 1 (0.7%) | 1 (2.9%) | 0 (1.1%) |
| Latvia | 1 (3.8%) | 3 (1.3%) | 16 (5.0%) | 3 (1.3%) | 7 (9.9%) | 6 (23.5%) | 28 (11.5%) | 131 (10.3%) | 133 (34.0%) | 19 (6.2%) | 57 (23.8%) | 4 (7.2%) |
| Lebanon | 1 (6.5%) | 3 (3.3%) | 13 (4.9%) | 1 (1.2%) | 4 (4.7%) | 8 (24.4%) | 14 (11.7%) | 188 (8.7%) | 105 (35.5%) | 16 (6.5%) | 20 (23.0%) | 7 (7.4%) |
| Lesotho | 2 (3.1%) | 0 (2.1%) | 1 (3.6%) | 0 (0.9%) | 2 (10.8%) | 0 (0.0%) | 1 (8.2%) | 13 (6.9%) | 6 (28.8%) | 1 (4.9%) | 0 (7.4%) | 0 (6.3%) |
| Liberia | 0 (1.7%) | 1 (1.1%) | 1 (2.2%) | 0 (0.5%) | 14 (7.3%) | 1 (11.0%) | 1 (5.0%) | 19 (3.1%) | 8 (16.1%) | 2 (2.7%) | 1 (6.0%) | 0 (3.3%) |
| Libya | 1 (9.9%) | 3 (2.2%) | 19 (5.4%) | 2 (1.4%) | 20 (21.1%) | 29 (26.3%) | 14 (13.6%) | 88 (7.5%) | 23 (41.7%) | 13 (7.2%) | 19 (26.2%) | 3 (8.0%) |
| Lithuania | 1 (3.3%) | 3 (0.9%) | 22 (4.8%) | 3 (1.2%) | 7 (7.6%) | 10 (22.6%) | 36 (11.1%) | 174 (10.1%) | 218 (31.9%) | 22 (6.1%) | 55 (22.8%) | 6 (6.8%) |
| Luxembourg | 1 (9.9%) | 1 (2.6%) | 4 (3.8%) | 0 (1.0%) | 2 (8.4%) | 0 (0.0%) | 3 (8.9%) | 46 (8.2%) | 13 (27.5%) | 3 (5.7%) | 7 (19.7%) | 1 (5.8%) |
| Madagascar | 0 (0.0%) | 0 (0.0%) | 0 (0.0%) | 0 (0.0%) | 0 (0.0%) | 0 (0.0%) | 0 (0.0%) | 0 (0.0%) | 0 (0.0%) | 0 (0.0%) | 0 (0.0%) | 0 (0.0%) |
| Malawi | 5 (0.5%) | 0 (0.3%) | 0 (0.4%) | 0 (0.2%) | 3 (1.4%) | 0 (4.0%) | 1 (1.8%) | 13 (0.9%) | 3 (6.2%) | 2 (0.7%) | 1 (0.8%) | 0 (0.8%) |
| Malaysia | 8 (6.6%) | 3 (0.6%) | 56 (2.9%) | 10 (0.8%) | 53 (8.4%) | 26 (15.0%) | 31 (6.7%) | 450 (5.4%) | 345 (23.0%) | 72 (3.9%) | 57 (14.4%) | 6 (4.1%) |
| Maldives | 0 (0.0%) | 0 (0.0%) | 0 (3.5%) | 0 (1.0%) | 0 (8.0%) | 0 (0.0%) | 0 (9.4%) | 5 (5.4%) | 2 (23.3%) | 1 (4.0%) | 0 (0.0%) | 0 (0.0%) |
| Mali | 1 (0.5%) | 3 (0.4%) | 1 (0.6%) | 0 (0.2%) | 7 (2.3%) | 0 (3.2%) | 2 (1.7%) | 23 (1.0%) | 9 (6.2%) | 3 (0.9%) | 2 (1.4%) | 0 (0.7%) |
| Malta | 1 (14.8%) | 1 (3.5%) | 5 (5.0%) | 0 (1.3%) | 1 (5.2%) | 1 (24.0%) | 6 (11.5%) | 42 (10.8%) | 32 (34.5%) | 3 (6.4%) | 7 (24.4%) | 1 (7.2%) |
| Mauritania | 1 (2.9%) | 1 (2.0%) | 2 (3.5%) | 0 (0.9%) | 13 (11.1%) | 2 (15.6%) | 1 (7.7%) | 30 (5.1%) | 11 (27.1%) | 4 (4.5%) | 2 (10.1%) | 1 (5.7%) |
| Mauritius | 1 (6.0%) | 1 (1.9%) | 4 (3.4%) | 0 (0.9%) | 2 (5.4%) | 2 (16.9%) | 3 (7.7%) | 39 (7.3%) | 38 (26.7%) | 3 (4.5%) | 2 (17.9%) | 1 (5.1%) |
| Mexico | 22 (6.2%) | 59 (1.3%) | 286 (4.8%) | 20 (1.3%) | 400 (9.2%) | 238 (22.9%) | 332 (11.0%) | 2650 (8.5%) | 1917 (35.9%) | 333 (6.4%) | 497 (23.4%) | 75 (7.2%) |
| Moldova | 1 (8.2%) | 7 (2.8%) | 25 (5.4%) | 4 (1.4%) | 32 (15.7%) | 5 (25.6%) | 32 (12.4%) | 174 (10.7%) | 197 (36.4%) | 14 (6.3%) | 33 (24.8%) | 3 (7.7%) |
| Mongolia | 5 (2.6%) | 6 (1.8%) | 3 (3.7%) | 0 (0.9%) | 142 (11.6%) | 1 (17.1%) | 6 (8.4%) | 13 (5.9%) | 8 (26.2%) | 5 (5.0%) | 12 (18.0%) | 0 (5.5%) |
| Montenegro | 0 (4.7%) | 0 (1.1%) | 3 (3.9%) | 0 (1.0%) | 3 (9.2%) | 2 (18.8%) | 3 (8.8%) | 36 (8.6%) | 28 (29.2%) | 2 (5.8%) | 4 (20.3%) | 0 (5.5%) |
| Morocco | 9 (5.2%) | 12 (1.3%) | 51 (3.5%) | 9 (0.9%) | 33 (6.4%) | 66 (16.9%) | 41 (8.3%) | 779 (6.1%) | 261 (28.4%) | 68 (5.0%) | 46 (13.3%) | 11 (5.2%) |
| Mozambique | 6 (0.7%) | 0 (0.4%) | 1 (0.7%) | 0 (0.2%) | 15 (1.9%) | 0 (6.0%) | 1 (1.7%) | 26 (1.3%) | 11 (7.2%) | 2 (1.1%) | 2 (1.1%) | 0 (1.4%) |
| Myanmar | 21 (2.0%) | 6 (0.2%) | 11 (0.8%) | 2 (0.2%) | 51 (2.5%) | 31 (4.2%) | 7 (2.1%) | 122 (1.6%) | 73 (8.0%) | 20 (1.1%) | 7 (3.7%) | 1 (1.0%) |
| Namibia | 0 (3.0%) | 0 (1.2%) | 1 (2.7%) | 0 (0.7%) | 1 (5.3%) | 1 (14.7%) | 0 (7.0%) | 27 (4.8%) | 12 (21.7%) | 2 (3.2%) | 2 (10.0%) | 0 (4.5%) |
| Nepal | 0 (0.1%) | 1 (0.2%) | 0 (0.2%) | 0 (0.0%) | 0 (0.4%) | 8 (0.9%) | 1 (0.4%) | 6 (0.3%) | 3 (1.5%) | 2 (0.2%) | 0 (0.9%) | 0 (0.3%) |
| New Caledonia | 0 (0.0%) | 0 (0.0%) | 0 (0.0%) | 0 (0.0%) | 0 (0.0%) | 0 (0.0%) | 0 (0.0%) | 0 (0.0%) | 0 (0.0%) | 0 (0.0%) | 0 (0.0%) | 0 (0.0%) |
| New Zealand | 13 (9.7%) | 9 (4.3%) | 55 (4.3%) | 6 (1.2%) | 14 (9.8%) | 10 (21.1%) | 33 (10.2%) | 377 (9.8%) | 176 (33.0%) | 24 (6.4%) | 44 (22.4%) | 11 (6.6%) |
| Nicaragua | 1 (7.2%) | 3 (1.2%) | 9 (4.0%) | 1 (1.1%) | 23 (8.2%) | 13 (20.3%) | 11 (9.4%) | 106 (8.8%) | 69 (31.9%) | 7 (5.8%) | 12 (19.0%) | 1 (6.8%) |
| Niger | 0 (0.1%) | 0 (0.1%) | 0 (0.2%) | 0 (0.1%) | 3 (0.7%) | 0 (2.2%) | 0 (0.4%) | 6 (0.3%) | 4 (2.3%) | 2 (0.3%) | 0 (0.4%) | 0 (0.2%) |
| Nigeria | 4 (1.5%) | 9 (0.8%) | 26 (1.5%) | 6 (0.4%) | 99 (5.3%) | 8 (6.3%) | 19 (3.2%) | 875 (2.7%) | 214 (13.2%) | 57 (2.0%) | 43 (5.7%) | 13 (2.5%) |
| North Macedonia | 1 (5.8%) | 1 (1.2%) | 7 (3.8%) | 2 (1.0%) | 8 (9.4%) | 5 (18.3%) | 11 (8.8%) | 83 (7.6%) | 79 (26.5%) | 5 (4.9%) | 6 (18.2%) | 1 (5.7%) |
| Norway | 11 (12.7%) | 5 (3.0%) | 85 (4.0%) | 6 (1.0%) | 13 (6.9%) | 5 (19.5%) | 55 (9.4%) | 396 (8.8%) | 243 (29.2%) | 26 (5.6%) | 65 (19.5%) | 14 (5.9%) |
| Oman | 0 (3.7%) | 1 (2.2%) | 2 (3.2%) | 0 (0.8%) | 2 (7.8%) | 2 (17.1%) | 1 (7.7%) | 19 (3.5%) | 11 (25.1%) | 2 (3.9%) | 4 (13.4%) | 1 (4.2%) |
| Pakistan | 33 (0.7%) | 8 (0.3%) | 39 (1.7%) | 6 (0.4%) | 180 (6.6%) | 186 (9.2%) | 13 (4.3%) | 998 (3.3%) | 519 (17.1%) | 124 (2.5%) | 122 (9.3%) | 29 (3.2%) |
| Panama | 1 (6.1%) | 2 (1.0%) | 14 (4.1%) | 1 (1.1%) | 9 (7.6%) | 7 (20.1%) | 8 (8.8%) | 80 (7.3%) | 113 (31.8%) | 6 (5.7%) | 12 (17.6%) | 2 (6.2%) |
| Papua New Guinea | 0 (0.0%) | 4 (2.0%) | 2 (2.3%) | 1 (0.6%) | 16 (5.2%) | 5 (13.0%) | 1 (4.9%) | 63 (3.8%) | 67 (20.3%) | 9 (3.4%) | 2 (11.0%) | 1 (3.6%) |
| Paraguay | 2 (5.7%) | 2 (1.0%) | 20 (3.8%) | 1 (1.0%) | 7 (7.7%) | 8 (18.0%) | 14 (8.5%) | 131 (6.3%) | 83 (26.9%) | 8 (4.9%) | 10 (19.4%) | 2 (5.8%) |
| Peru | 5 (5.1%) | 16 (0.6%) | 76 (3.6%) | 4 (0.9%) | 101 (8.9%) | 148 (17.9%) | 84 (8.3%) | 492 (6.3%) | 380 (28.6%) | 60 (5.2%) | 129 (17.8%) | 18 (5.5%) |
| Philippines | 12 (3.5%) | 3 (0.2%) | 53 (0.8%) | 6 (0.2%) | 98 (2.6%) | 10 (4.7%) | 38 (1.9%) | 645 (2.0%) | 480 (9.0%) | 90 (1.4%) | 46 (4.7%) | 7 (1.3%) |
| Poland | 52 (11.8%) | 60 (2.4%) | 318 (4.5%) | 47 (1.2%) | 115 (10.5%) | 169 (21.5%) | 315 (10.5%) | 2320 (9.5%) | 2517 (32.0%) | 274 (5.9%) | 499 (21.9%) | 85 (6.6%) |
| Portugal | 7 (7.4%) | 17 (1.1%) | 118 (3.9%) | 14 (1.0%) | 31 (6.6%) | 21 (18.9%) | 98 (9.3%) | 696 (7.8%) | 402 (28.7%) | 35 (5.1%) | 106 (18.5%) | 26 (5.8%) |
| Puerto Rico | 3 (12.4%) | 1 (1.4%) | 31 (5.0%) | 3 (1.3%) | 16 (11.4%) | 4 (23.5%) | 21 (11.2%) | 218 (11.7%) | 163 (36.2%) | 12 (7.2%) | 24 (24.7%) | 8 (7.4%) |
| Qatar | 1 (12.1%) | 0 (2.8%) | 3 (6.0%) | 0 (1.6%) | 2 (19.1%) | 2 (27.5%) | 2 (12.3%) | 19 (7.5%) | 8 (42.3%) | 2 (7.7%) | 3 (29.6%) | 0 (8.0%) |
| Romania | 11 (8.2%) | 11 (0.8%) | 148 (4.4%) | 23 (1.2%) | 178 (13.6%) | 25 (20.6%) | 157 (10.2%) | 1227 (9.7%) | 734 (32.2%) | 108 (6.0%) | 224 (22.1%) | 21 (6.5%) |
| Russian Federation | 156 (7.0%) | 523 (3.0%) | 1444 (4.8%) | 171 (1.3%) | 775 (16.1%) | 340 (22.4%) | 1240 (11.0%) | 8034 (10.2%) | 10051 (33.7%) | 888 (6.1%) | 2861 (23.4%) | 191 (7.0%) |
| Rwanda | 0 (0.2%) | 1 (0.1%) | 0 (0.3%) | 0 (0.1%) | 1 (0.6%) | 0 (0.0%) | 0 (0.6%) | 2 (0.3%) | 1 (2.3%) | 1 (0.5%) | 0 (0.5%) | 0 (0.4%) |
| Saint Lucia | 0 (0.0%) | 0 (3.0%) | 1 (5.8%) | 0 (1.6%) | 0 (0.0%) | 0 (28.2%) | 1 (12.4%) | 6 (8.3%) | 3 (39.2%) | 1 (8.7%) | 1 (29.3%) | 0 (7.4%) |
| Samoa | 0 (0.0%) | 1 (8.3%) | 1 (8.4%) | 0 (2.4%) | 0 (34.3%) | 0 (0.0%) | 1 (18.9%) | 12 (15.7%) | 12 (53.1%) | 1 (12.3%) | 3 (39.4%) | 0 (11.7%) |
| Sao Tome and Principe | 0 (0.0%) | 0 (0.0%) | 0 (3.2%) | 0 (0.0%) | 0 (13.2%) | 0 (16.2%) | 0 (7.8%) | 1 (4.0%) | 1 (25.6%) | 0 (4.3%) | 0 (0.0%) | 0 (0.0%) |
| Saudi Arabia | 7 (6.9%) | 6 (2.5%) | 36 (5.4%) | 7 (1.4%) | 50 (15.6%) | 33 (25.8%) | 21 (12.6%) | 243 (6.4%) | 362 (39.0%) | 30 (7.1%) | 62 (23.0%) | 8 (8.1%) |
| Senegal | 1 (1.5%) | 3 (1.0%) | 3 (1.7%) | 1 (0.4%) | 27 (5.6%) | 2 (7.2%) | 3 (4.2%) | 52 (2.8%) | 20 (15.4%) | 5 (2.0%) | 3 (4.2%) | 1 (2.9%) |
| Serbia | 3 (6.6%) | 9 (1.9%) | 46 (4.0%) | 9 (1.1%) | 23 (7.0%) | 27 (19.6%) | 67 (9.5%) | 445 (9.1%) | 336 (28.4%) | 39 (5.2%) | 62 (18.4%) | 11 (6.0%) |
| Sierra Leone | 0 (0.0%) | 0 (0.5%) | 0 (0.8%) | 0 (0.2%) | 3 (2.4%) | 0 (0.0%) | 1 (2.7%) | 3 (1.4%) | 0 (7.0%) | 1 (1.3%) | 0 (2.9%) | 0 (0.0%) |
| Singapore | 1 (4.5%) | 2 (0.6%) | 17 (1.5%) | 2 (0.4%) | 12 (3.5%) | 8 (8.0%) | 14 (3.6%) | 115 (3.2%) | 91 (10.6%) | 9 (1.8%) | 16 (7.8%) | 3 (2.3%) |
| Slovakia | 4 (8.2%) | 5 (1.4%) | 48 (4.4%) | 6 (1.1%) | 13 (7.2%) | 24 (20.8%) | 49 (10.0%) | 338 (9.3%) | 342 (28.9%) | 26 (5.1%) | 91 (21.8%) | 11 (6.5%) |
| Slovenia | 1 (4.6%) | 3 (1.9%) | 15 (3.8%) | 2 (1.0%) | 9 (6.3%) | 9 (17.9%) | 17 (8.6%) | 144 (8.7%) | 114 (29.0%) | 11 (5.4%) | 23 (19.5%) | 5 (5.4%) |
| Solomon Islands | 0 (0.0%) | 0 (2.7%) | 0 (3.1%) | 0 (0.9%) | 1 (7.5%) | 0 (17.8%) | 0 (5.4%) | 6 (4.9%) | 8 (28.4%) | 1 (4.2%) | 0 (12.6%) | 0 (6.0%) |
| Somalia | 3 (1.4%) | 2 (0.8%) | 3 (1.4%) | 0 (0.3%) | 6 (4.9%) | 4 (7.9%) | 3 (3.4%) | 43 (2.4%) | 17 (12.1%) | 6 (1.8%) | 4 (4.2%) | 1 (2.2%) |
| South Africa | 14 (1.0%) | 24 (3.2%) | 95 (5.6%) | 21 (1.4%) | 177 (15.0%) | 74 (25.8%) | 184 (12.6%) | 1549 (10.5%) | 728 (39.6%) | 116 (7.5%) | 111 (20.1%) | 50 (8.3%) |
| South Sudan | 0 (0.0%) | 0 (0.0%) | 0 (0.0%) | 0 (0.0%) | 0 (0.0%) | 0 (0.0%) | 0 (0.0%) | 0 (0.0%) | 0 (0.0%) | 0 (0.0%) | 0 (0.0%) | 0 (0.0%) |
| Spain | 28 (7.1%) | 41 (1.4%) | 434 (4.0%) | 45 (1.0%) | 183 (9.6%) | 87 (19.9%) | 408 (9.1%) | 2655 (7.6%) | 1849 (27.6%) | 169 (4.9%) | 527 (19.3%) | 97 (6.0%) |
| Sri Lanka | 3 (0.5%) | 3 (1.0%) | 7 (1.1%) | 2 (0.3%) | 3 (2.4%) | 4 (5.9%) | 3 (2.5%) | 120 (2.6%) | 76 (10.0%) | 22 (1.7%) | 6 (5.7%) | 4 (1.7%) |
| Sudan | 22 (5.6%) | 3 (1.1%) | 9 (2.3%) | 3 (0.6%) | 47 (11.0%) | 30 (14.8%) | 9 (6.5%) | 278 (4.2%) | 90 (25.0%) | 41 (4.1%) | 38 (12.6%) | 5 (4.7%) |
| Suriname | 0 (0.0%) | 0 (1.8%) | 2 (4.5%) | 0 (1.2%) | 2 (8.1%) | 1 (19.0%) | 1 (10.4%) | 13 (8.2%) | 4 (30.1%) | 1 (6.4%) | 0 (20.6%) | 0 (7.2%) |
| Sweden | 18 (9.5%) | 10 (2.9%) | 86 (3.3%) | 8 (0.9%) | 26 (7.6%) | 30 (16.1%) | 98 (7.7%) | 543 (7.3%) | 371 (24.6%) | 32 (4.4%) | 92 (16.0%) | 17 (4.8%) |
| Switzerland | 12 (6.6%) | 9 (2.2%) | 40 (2.5%) | 4 (0.6%) | 20 (5.9%) | 11 (12.5%) | 61 (6.0%) | 363 (5.5%) | 199 (18.1%) | 23 (3.4%) | 39 (12.9%) | 13 (3.7%) |
| Syrian Arab Republic | 3 (6.8%) | 11 (3.8%) | 34 (5.7%) | 5 (1.4%) | 25 (13.0%) | 19 (26.9%) | 30 (13.2%) | 362 (8.8%) | 259 (36.8%) | 27 (5.9%) | 38 (24.4%) | 13 (8.5%) |
| Tajikistan | 1 (1.5%) | 16 (3.2%) | 2 (3.2%) | 0 (0.8%) | 10 (7.2%) | 2 (19.1%) | 3 (7.7%) | 36 (4.4%) | 52 (22.1%) | 2 (3.1%) | 6 (12.0%) | 0 (4.1%) |
| Tanzania, United Republic of | 11 (1.1%) | 3 (0.7%) | 5 (1.3%) | 2 (0.3%) | 18 (4.1%) | 3 (5.0%) | 6 (3.2%) | 111 (2.5%) | 42 (11.2%) | 11 (1.6%) | 8 (2.4%) | 1 (2.0%) |
| Thailand | 12 (2.1%) | 8 (0.4%) | 104 (2.0%) | 25 (0.5%) | 309 (3.5%) | 80 (9.4%) | 59 (4.6%) | 1002 (4.6%) | 804 (18.9%) | 131 (3.2%) | 70 (10.5%) | 21 (3.0%) |
| The Netherlands | 87 (12.4%) | 20 (2.6%) | 187 (3.4%) | 18 (0.9%) | 37 (5.8%) | 22 (16.9%) | 138 (8.0%) | 1179 (7.4%) | 568 (25.7%) | 68 (4.7%) | 180 (17.1%) | 34 (5.1%) |
| The Republic of the Gambia | 0 (1.2%) | 0 (1.0%) | 0 (1.4%) | 0 (0.4%) | 3 (4.8%) | 0 (0.0%) | 1 (4.8%) | 2 (1.9%) | 2 (14.2%) | 0 (1.7%) | 0 (3.2%) | 0 (0.0%) |
| Timor-Leste | 0 (0.0%) | 0 (0.0%) | 0 (0.0%) | 0 (0.0%) | 0 (0.0%) | 0 (0.0%) | 0 (0.0%) | 0 (0.0%) | 0 (0.0%) | 0 (0.0%) | 0 (0.0%) | 0 (0.0%) |
| Togo | 1 (1.5%) | 1 (1.0%) | 1 (1.7%) | 0 (0.4%) | 5 (5.4%) | 1 (7.6%) | 1 (3.8%) | 25 (2.6%) | 19 (15.0%) | 3 (2.4%) | 2 (6.1%) | 0 (2.6%) |
| Trinidad and Tobago | 0 (0.0%) | 0 (1.3%) | 6 (4.9%) | 1 (1.3%) | 2 (5.5%) | 3 (21.7%) | 5 (11.2%) | 56 (9.8%) | 80 (36.8%) | 8 (6.9%) | 11 (24.8%) | 2 (7.6%) |
| Tunisia | 4 (7.7%) | 2 (0.7%) | 21 (4.1%) | 4 (1.1%) | 22 (7.7%) | 21 (19.4%) | 19 (9.6%) | 198 (7.0%) | 103 (32.1%) | 21 (5.8%) | 27 (18.9%) | 7 (6.3%) |
| Turkmenistan | 3 (1.7%) | 8 (3.7%) | 2 (4.0%) | 1 (1.0%) | 11 (8.3%) | 3 (20.4%) | 5 (9.0%) | 58 (5.8%) | 48 (29.0%) | 6 (4.4%) | 13 (16.0%) | 2 (5.7%) |
| T�rkiye | 40 (6.4%) | 186 (4.0%) | 381 (5.6%) | 47 (1.5%) | 239 (13.3%) | 140 (26.6%) | 470 (13.0%) | 2477 (9.8%) | 3114 (39.7%) | 300 (7.8%) | 522 (26.4%) | 111 (8.5%) |
| Uganda | 4 (0.4%) | 1 (0.3%) | 2 (0.6%) | 0 (0.2%) | 17 (2.1%) | 0 (3.9%) | 3 (1.4%) | 28 (0.9%) | 22 (5.5%) | 6 (0.8%) | 2 (0.9%) | 1 (1.0%) |
| Ukraine | 14 (6.3%) | 46 (1.4%) | 236 (4.0%) | 45 (1.0%) | 64 (7.8%) | 80 (18.9%) | 231 (9.1%) | 1552 (8.6%) | 2478 (29.3%) | 225 (5.3%) | 479 (19.8%) | 32 (5.8%) |
| United Arab Emirates | 1 (9.1%) | 2 (3.6%) | 8 (5.6%) | 1 (1.5%) | 4 (12.5%) | 3 (28.1%) | 4 (13.1%) | 104 (9.1%) | 60 (39.1%) | 8 (7.3%) | 11 (25.2%) | 2 (8.2%) |
| United Kingdom | 407 (13.1%) | 86 (4.0%) | 628 (4.2%) | 74 (1.1%) | 211 (6.4%) | 194 (20.1%) | 542 (9.7%) | 5580 (9.5%) | 3254 (31.2%) | 383 (6.0%) | 1058 (21.2%) | 167 (6.2%) |
| United States of America | 700 (17.5%) | 429 (4.2%) | 2681 (5.2%) | 258 (1.4%) | 1725 (13.8%) | 778 (24.6%) | 3449 (12.1%) | 32739 (11.9%) | 25068 (38.0%) | 1576 (7.4%) | 6547 (26.0%) | 1094 (7.8%) |
| Uruguay | 5 (6.2%) | 3 (1.3%) | 39 (5.0%) | 3 (1.3%) | 6 (13.1%) | 20 (23.3%) | 52 (11.5%) | 229 (10.5%) | 95 (34.8%) | 16 (6.6%) | 63 (23.8%) | 6 (7.3%) |
| Uzbekistan | 14 (1.8%) | 44 (3.8%) | 30 (4.6%) | 6 (1.1%) | 58 (9.3%) | 11 (21.6%) | 53 (10.1%) | 338 (6.7%) | 291 (32.6%) | 43 (5.0%) | 46 (17.6%) | 1 (6.0%) |
| Vanuatu | 0 (0.0%) | 0 (0.0%) | 0 (3.5%) | 0 (1.1%) | 0 (7.8%) | 0 (0.0%) | 0 (0.0%) | 2 (4.8%) | 3 (30.3%) | 0 (4.8%) | 0 (0.0%) | 0 (0.0%) |
| Venezuela | 4 (5.5%) | 8 (1.0%) | 81 (3.8%) | 7 (1.0%) | 52 (7.9%) | 25 (18.2%) | 67 (8.8%) | 622 (7.5%) | 435 (29.2%) | 57 (5.3%) | 143 (19.3%) | 13 (5.8%) |
| Viet Nam | 0 (0.1%) | 0 (0.0%) | 1 (0.0%) | 0 (0.0%) | 6 (0.1%) | 0 (0.2%) | 0 (0.1%) | 18 (0.1%) | 17 (0.3%) | 1 (0.0%) | 2 (0.1%) | 0 (0.1%) |
| Yemen | 11 (2.2%) | 4 (0.9%) | 8 (1.5%) | 1 (0.4%) | 8 (3.2%) | 1 (7.7%) | 6 (3.6%) | 47 (1.7%) | 2 (12.0%) | 5 (1.4%) | 2 (3.4%) | 0 (2.9%) |
| Zambia | 2 (1.1%) | 1 (0.8%) | 1 (1.4%) | 0 (0.3%) | 6 (4.0%) | 0 (5.8%) | 2 (3.5%) | 27 (2.5%) | 7 (12.3%) | 3 (1.5%) | 1 (1.9%) | 1 (1.5%) |
| Zimbabwe | 20 (4.2%) | 8 (1.7%) | 6 (2.7%) | 1 (0.7%) | 30 (10.3%) | 5 (13.5%) | 7 (6.5%) | 87 (4.8%) | 75 (22.2%) | 11 (3.6%) | 6 (7.2%) | 7 (4.2%) |

**Table 5.4.3.** Proportion and number of cancer cases by cancer site attributable to high body mass index, men, 30+ years, 2022

| **Country** | **Oesophagus** | **Stomach** | **Colon** | **Rectum** | **Liver and intrahepatic ducts** | **Gallbladder** | **Pancreas** | **Kidney** | **Multiple myeloma** |
| --- | --- | --- | --- | --- | --- | --- | --- | --- | --- |
| **N (PAF)** | **N (PAF)** | **N (PAF)** | **N (PAF)** | **N (PAF)** | **N (PAF)** | **N (PAF)** | **N (PAF)** | **N (PAF)** |
| Afghanistan | 2 (0.3%) | 5 (0.4%) | 2 (0.7%) | 0 (0.2%) | 6 (1.1%) | 1 (1.7%) | 2 (1.0%) | 7 (1.8%) | 1 (0.8%) |
| Albania | 6 (11.5%) | 13 (2.8%) | 13 (8.5%) | 3 (1.9%) | 13 (11.9%) | 5 (16.9%) | 21 (10.7%) | 25 (19.1%) | 3 (7.2%) |
| Algeria | 11 (7.5%) | 12 (0.7%) | 113 (4.7%) | 17 (1.0%) | 22 (5.1%) | 34 (9.7%) | 42 (6.0%) | 40 (9.7%) | 16 (4.0%) |
| Angola | 2 (0.3%) | 1 (0.3%) | 1 (0.4%) | 0 (0.1%) | 6 (0.8%) | 0 (0.7%) | 2 (0.8%) | 1 (0.5%) | 0 (0.3%) |
| Argentina | 221 (15.4%) | 61 (2.1%) | 711 (10.4%) | 40 (2.3%) | 175 (11.4%) | 45 (20.2%) | 352 (13.0%) | 803 (23.5%) | 50 (8.6%) |
| Armenia | 3 (8.5%) | 11 (3.0%) | 27 (7.0%) | 2 (1.6%) | 31 (10.1%) | 2 (13.7%) | 22 (8.6%) | 20 (15.8%) | 1 (5.8%) |
| Australia | 296 (23.0%) | 138 (7.9%) | 551 (9.7%) | 68 (2.2%) | 370 (15.1%) | 26 (19.2%) | 238 (12.5%) | 678 (22.5%) | 98 (8.3%) |
| Austria | 54 (13.8%) | 29 (4.0%) | 140 (8.6%) | 18 (1.9%) | 86 (11.1%) | 8 (17.1%) | 118 (10.8%) | 177 (19.5%) | 20 (7.1%) |
| Azerbaijan | 40 (8.5%) | 45 (3.2%) | 34 (7.3%) | 5 (1.6%) | 34 (10.7%) | 3 (13.4%) | 18 (9.0%) | 37 (16.2%) | 5 (5.9%) |
| Bahamas | 1 (11.5%) | 0 (1.5%) | 3 (8.8%) | 0 (2.0%) | 1 (8.7%) | 0 (15.3%) | 1 (11.1%) | 1 (21.4%) | 1 (7.4%) |
| Bahrain | 1 (9.1%) | 0 (2.0%) | 3 (4.6%) | 0 (1.1%) | 1 (6.8%) | 0 (11.2%) | 1 (5.8%) | 3 (12.2%) | 0 (3.8%) |
| Bangladesh | 0 (0.0%) | 0 (0.0%) | 0 (0.0%) | 0 (0.0%) | 0 (0.0%) | 0 (0.0%) | 0 (0.0%) | 0 (0.0%) | 0 (0.0%) |
| Barbados | 0 (11.6%) | 0 (1.3%) | 3 (7.2%) | 0 (1.7%) | 1 (6.9%) | 0 (0.0%) | 2 (9.2%) | 3 (17.5%) | 1 (6.2%) |
| Belarus | 22 (4.2%) | 25 (1.4%) | 144 (8.7%) | 27 (2.0%) | 45 (10.7%) | 5 (16.9%) | 82 (10.8%) | 298 (19.3%) | 12 (7.1%) |
| Belgium | 145 (17.2%) | 66 (7.2%) | 266 (9.3%) | 29 (2.1%) | 124 (13.7%) | 5 (18.0%) | 137 (11.6%) | 267 (21.1%) | 42 (7.7%) |
| Belize | 0 (10.5%) | 0 (1.4%) | 1 (8.8%) | 0 (0.0%) | 1 (9.4%) | 0 (0.0%) | 0 (10.4%) | 1 (22.1%) | 0 (0.0%) |
| Benin | 1 (1.1%) | 1 (0.4%) | 1 (0.8%) | 0 (0.2%) | 6 (1.4%) | 0 (1.6%) | 2 (1.4%) | 2 (3.3%) | 0 (1.4%) |
| Bhutan | 0 (1.0%) | 1 (1.1%) | 0 (2.0%) | 0 (0.5%) | 1 (3.0%) | 0 (5.1%) | 0 (3.0%) | 0 (7.2%) | 0 (2.4%) |
| Bolivia | 6 (4.8%) | 6 (1.0%) | 16 (5.2%) | 1 (1.3%) | 23 (5.9%) | 40 (9.8%) | 11 (6.2%) | 20 (10.1%) | 1 (4.5%) |
| Bosnia Herzegovina | 9 (11.1%) | 12 (2.7%) | 44 (8.1%) | 9 (1.8%) | 31 (11.4%) | 6 (15.6%) | 27 (10.1%) | 41 (18.4%) | 3 (6.5%) |
| Botswana | 1 (0.6%) | 0 (0.6%) | 0 (1.1%) | 0 (0.2%) | 0 (2.1%) | 0 (0.0%) | 0 (1.6%) | 0 (2.1%) | 0 (1.2%) |
| Brazil | 347 (3.9%) | 213 (1.4%) | 1161 (7.1%) | 203 (1.6%) | 754 (9.5%) | 89 (13.9%) | 669 (8.9%) | 1159 (16.4%) | 187 (5.9%) |
| Brunei Darussalam | 0 (9.3%) | 0 (1.1%) | 3 (7.9%) | 1 (1.8%) | 3 (11.4%) | 0 (0.0%) | 1 (9.2%) | 2 (19.2%) | 0 (6.7%) |
| Bulgaria | 12 (6.5%) | 21 (2.3%) | 167 (9.0%) | 22 (2.1%) | 60 (13.7%) | 4 (17.5%) | 77 (11.2%) | 104 (20.5%) | 8 (7.5%) |
| Burkina Faso | 0 (0.1%) | 0 (0.1%) | 0 (0.2%) | 0 (0.0%) | 5 (0.5%) | 0 (0.0%) | 1 (0.3%) | 0 (0.2%) | 0 (0.0%) |
| Burundi | 0 (0.0%) | 0 (0.0%) | 0 (0.1%) | 0 (0.0%) | 0 (0.2%) | 0 (0.3%) | 0 (0.2%) | 0 (0.1%) | 0 (0.1%) |
| Cambodia | 0 (0.0%) | 0 (0.0%) | 0 (0.1%) | 0 (0.0%) | 4 (0.1%) | 0 (0.1%) | 0 (0.1%) | 0 (0.1%) | 0 (0.0%) |
| Cameroon | 1 (1.4%) | 2 (1.1%) | 6 (2.7%) | 1 (0.6%) | 24 (3.4%) | 1 (6.3%) | 5 (3.6%) | 4 (3.0%) | 1 (2.4%) |
| Canada | 533 (23.3%) | 205 (7.6%) | 821 (9.8%) | 99 (2.2%) | 453 (14.1%) | 33 (19.0%) | 441 (12.4%) | 1210 (22.4%) | 227 (8.2%) |
| Cape Verde | 0 (1.5%) | 0 (1.2%) | 0 (2.9%) | 0 (0.7%) | 0 (5.3%) | 0 (5.9%) | 0 (2.2%) | 0 (5.1%) | 0 (2.9%) |
| Central African Republic | 0 (0.2%) | 0 (0.2%) | 0 (0.2%) | 0 (0.1%) | 1 (0.5%) | 0 (0.5%) | 0 (0.5%) | 0 (0.3%) | 0 (0.3%) |
| Chad | 0 (0.4%) | 0 (0.2%) | 0 (0.4%) | 0 (0.1%) | 11 (1.1%) | 0 (1.9%) | 1 (1.2%) | 1 (0.7%) | 0 (0.9%) |
| Chile | 19 (3.5%) | 136 (4.1%) | 209 (9.9%) | 27 (2.3%) | 122 (13.7%) | 116 (19.2%) | 108 (12.4%) | 338 (22.7%) | 42 (8.3%) |
| China | 2268 (1.4%) | 3688 (1.5%) | 5773 (3.8%) | 1284 (0.9%) | 15920 (5.9%) | 933 (7.4%) | 3182 (4.7%) | 4362 (9.2%) | 531 (3.2%) |
| Colombia | 86 (12.4%) | 63 (1.2%) | 238 (6.5%) | 24 (1.4%) | 100 (8.0%) | 24 (12.9%) | 109 (8.1%) | 189 (15.0%) | 44 (5.5%) |
| Comoros | 0 (0.9%) | 0 (1.2%) | 0 (2.2%) | 0 (0.3%) | 0 (2.5%) | 0 (0.0%) | 0 (3.2%) | 0 (0.0%) | 0 (0.0%) |
| Congo, Democratic Republic of | 0 (0.0%) | 0 (0.0%) | 0 (0.0%) | 0 (0.0%) | 0 (0.0%) | 0 (0.0%) | 0 (0.0%) | 0 (0.0%) | 0 (0.0%) |
| Congo, Republic of | 0 (0.6%) | 0 (0.4%) | 0 (1.0%) | 0 (0.2%) | 1 (0.5%) | 0 (0.0%) | 0 (1.3%) | 0 (0.6%) | 0 (0.9%) |
| Costa Rica | 7 (12.5%) | 11 (1.5%) | 24 (7.6%) | 3 (1.8%) | 23 (9.4%) | 2 (15.3%) | 16 (9.7%) | 22 (18.4%) | 4 (6.6%) |
| Croatia | 14 (8.1%) | 17 (2.9%) | 160 (10.6%) | 23 (2.4%) | 55 (14.8%) | 14 (20.3%) | 52 (13.3%) | 131 (24.0%) | 20 (8.8%) |
| Cuba | 65 (8.1%) | 9 (1.1%) | 85 (5.1%) | 5 (1.2%) | 18 (3.5%) | 2 (11.0%) | 37 (6.6%) | 57 (13.2%) | 10 (4.4%) |
| Cyprus | 2 (15.4%) | 4 (3.9%) | 24 (10.6%) | 2 (2.4%) | 8 (9.9%) | 1 (20.6%) | 14 (13.3%) | 16 (24.3%) | 5 (8.7%) |
| Czechia | 40 (7.2%) | 33 (4.4%) | 282 (11.6%) | 48 (2.6%) | 88 (13.4%) | 28 (22.6%) | 176 (14.5%) | 521 (25.9%) | 31 (9.6%) |
| C�te d'Ivoire | 1 (1.0%) | 3 (1.0%) | 9 (2.2%) | 1 (0.5%) | 30 (3.4%) | 1 (4.1%) | 5 (3.0%) | 3 (2.5%) | 2 (1.8%) |
| Denmark | 73 (16.4%) | 45 (9.5%) | 215 (8.4%) | 22 (1.9%) | 46 (10.7%) | 4 (16.5%) | 67 (10.5%) | 156 (19.0%) | 26 (6.9%) |
| Djibouti | 0 (1.1%) | 0 (0.8%) | 0 (2.5%) | 0 (0.5%) | 1 (4.5%) | 0 (0.0%) | 0 (3.2%) | 0 (5.4%) | 0 (2.4%) |
| Dominican Republic | 10 (8.4%) | 5 (1.1%) | 47 (6.1%) | 2 (1.3%) | 26 (5.8%) | 3 (11.3%) | 24 (7.2%) | 11 (12.2%) | 5 (5.0%) |
| Ecuador | 13 (8.6%) | 12 (0.8%) | 63 (7.5%) | 5 (1.6%) | 55 (10.4%) | 11 (15.3%) | 31 (9.3%) | 56 (16.0%) | 10 (6.3%) |
| Egypt | 127 (14.9%) | 63 (3.8%) | 165 (8.9%) | 16 (1.9%) | 3097 (17.4%) | 72 (19.3%) | 252 (12.3%) | 255 (19.5%) | 48 (8.1%) |
| El Salvador | 6 (11.8%) | 5 (1.5%) | 18 (7.7%) | 1 (1.7%) | 16 (7.6%) | 3 (14.0%) | 10 (9.3%) | 15 (17.7%) | 2 (6.5%) |
| Equatorial Guinea | 0 (0.5%) | 0 (0.2%) | 0 (0.5%) | 0 (0.1%) | 0 (0.5%) | 0 (0.1%) | 0 (1.0%) | 0 (1.0%) | 0 (0.3%) |
| Eritrea | 0 (0.0%) | 0 (0.0%) | 0 (0.0%) | 0 (0.0%) | 0 (0.0%) | 0 (0.0%) | 0 (0.0%) | 0 (0.0%) | 0 (0.0%) |
| Estonia | 3 (4.3%) | 4 (2.0%) | 31 (9.3%) | 4 (2.1%) | 10 (12.2%) | 1 (18.3%) | 15 (11.8%) | 34 (21.4%) | 4 (7.8%) |
| Eswatini | 0 (2.2%) | 0 (2.9%) | 0 (4.1%) | 0 (1.0%) | 1 (6.4%) | 0 (0.0%) | 0 (5.8%) | 0 (0.0%) | 0 (3.4%) |
| Ethiopia | 0 (0.0%) | 0 (0.0%) | 0 (0.0%) | 0 (0.0%) | 0 (0.0%) | 0 (0.0%) | 0 (0.0%) | 0 (0.0%) | 0 (0.0%) |
| Fiji | 0 (0.0%) | 1 (6.1%) | 2 (7.7%) | 0 (1.9%) | 7 (11.8%) | 1 (17.1%) | 1 (10.2%) | 0 (20.3%) | 0 (6.8%) |
| Finland | 49 (17.9%) | 15 (4.6%) | 114 (9.1%) | 17 (2.1%) | 57 (12.6%) | 6 (17.8%) | 83 (11.4%) | 140 (20.5%) | 18 (7.5%) |
| France (metropolitan) | 414 (11.2%) | 335 (6.7%) | 1490 (8.7%) | 180 (2.0%) | 1130 (13.0%) | 42 (17.1%) | 858 (10.8%) | 1780 (19.2%) | 208 (7.1%) |
| France, Guadeloupe | 0 (0.0%) | 0 (0.0%) | 0 (0.0%) | 0 (0.0%) | 0 (0.0%) | 0 (0.0%) | 0 (0.0%) | 0 (0.0%) | 0 (0.0%) |
| France, La R�union | 0 (0.0%) | 0 (0.0%) | 0 (0.0%) | 0 (0.0%) | 0 (0.0%) | 0 (0.0%) | 0 (0.0%) | 0 (0.0%) | 0 (0.0%) |
| France, Martinique | 0 (0.0%) | 0 (0.0%) | 0 (0.0%) | 0 (0.0%) | 0 (0.0%) | 0 (0.0%) | 0 (0.0%) | 0 (0.0%) | 0 (0.0%) |
| French Guyana | 0 (0.0%) | 0 (0.0%) | 0 (0.0%) | 0 (0.0%) | 0 (0.0%) | 0 (0.0%) | 0 (0.0%) | 0 (0.0%) | 0 (0.0%) |
| French Polynesia | 0 (0.0%) | 0 (2.9%) | 2 (12.3%) | 0 (2.8%) | 4 (17.8%) | 1 (23.4%) | 2 (15.2%) | 3 (28.6%) | 1 (10.5%) |
| Gabon | 0 (1.8%) | 0 (1.4%) | 1 (3.5%) | 0 (0.7%) | 4 (4.6%) | 0 (7.9%) | 1 (5.1%) | 1 (6.0%) | 0 (3.3%) |
| Gaza Strip and West Bank | 0 (0.0%) | 0 (0.0%) | 0 (0.0%) | 0 (0.0%) | 0 (0.0%) | 0 (0.0%) | 0 (0.0%) | 0 (0.0%) | 0 (0.0%) |
| Georgia | 6 (10.6%) | 18 (4.2%) | 27 (9.6%) | 7 (2.2%) | 45 (13.8%) | 3 (18.7%) | 21 (11.9%) | 44 (21.8%) | 3 (8.1%) |
| Germany | 1006 (17.9%) | 589 (7.1%) | 2024 (10.3%) | 293 (2.4%) | 948 (14.2%) | 104 (20.1%) | 1418 (12.9%) | 3041 (23.5%) | 321 (8.5%) |
| Ghana | 1 (0.5%) | 2 (0.4%) | 1 (0.8%) | 1 (0.2%) | 35 (1.3%) | 1 (3.1%) | 3 (1.6%) | 2 (1.1%) | 1 (1.3%) |
| Greece | 26 (13.0%) | 37 (3.2%) | 362 (9.9%) | 13 (2.3%) | 152 (13.9%) | 6 (19.6%) | 151 (12.3%) | 280 (22.4%) | 33 (8.2%) |
| Guam | 0 (0.0%) | 0 (0.0%) | 0 (0.0%) | 0 (0.0%) | 0 (0.0%) | 0 (0.0%) | 0 (0.0%) | 0 (0.0%) | 0 (0.0%) |
| Guatemala | 7 (7.5%) | 7 (1.0%) | 19 (4.9%) | 0 (1.2%) | 53 (5.3%) | 2 (9.5%) | 11 (6.5%) | 19 (13.3%) | 1 (4.9%) |
| Guinea | 0 (0.2%) | 0 (0.3%) | 0 (0.6%) | 0 (0.1%) | 10 (1.1%) | 0 (2.1%) | 0 (1.0%) | 0 (1.1%) | 0 (0.4%) |
| Guinea-Bissau | 0 (1.3%) | 0 (0.5%) | 0 (1.1%) | 0 (0.3%) | 2 (1.9%) | 0 (0.0%) | 0 (2.2%) | 0 (1.9%) | 0 (1.5%) |
| Guyana | 0 (3.6%) | 0 (1.0%) | 2 (4.5%) | 0 (1.1%) | 1 (6.0%) | 0 (10.7%) | 1 (6.0%) | 1 (13.3%) | 0 (0.0%) |
| Haiti | 10 (10.2%) | 8 (1.4%) | 23 (6.7%) | 1 (1.6%) | 30 (6.3%) | 3 (15.0%) | 14 (9.2%) | 16 (14.4%) | 1 (6.3%) |
| Honduras | 7 (9.2%) | 6 (1.2%) | 9 (5.7%) | 1 (1.4%) | 15 (5.3%) | 3 (10.8%) | 12 (7.7%) | 11 (12.5%) | 3 (5.3%) |
| Hungary | 36 (7.6%) | 32 (3.2%) | 372 (11.0%) | 55 (2.5%) | 104 (16.2%) | 13 (21.1%) | 156 (13.7%) | 295 (24.1%) | 18 (9.1%) |
| Iceland | 4 (18.5%) | 0 (2.6%) | 7 (9.3%) | 1 (2.1%) | 3 (12.0%) | 0 (0.0%) | 4 (11.5%) | 9 (21.4%) | 1 (7.7%) |
| India | 11 (0.0%) | 9 (0.0%) | 11 (0.1%) | 2 (0.0%) | 19 (0.1%) | 8 (0.1%) | 6 (0.1%) | 17 (0.2%) | 4 (0.0%) |
| Indonesia | 3 (0.3%) | 2 (0.1%) | 60 (0.5%) | 12 (0.1%) | 158 (0.9%) | 3 (0.8%) | 17 (0.5%) | 31 (1.6%) | 8 (0.4%) |
| Iran, Islamic Republic of | 58 (2.9%) | 411 (3.8%) | 288 (5.9%) | 30 (1.3%) | 194 (6.1%) | 34 (11.7%) | 164 (7.5%) | 171 (13.1%) | 40 (4.8%) |
| Iraq | 14 (10.5%) | 28 (4.0%) | 80 (9.2%) | 8 (2.0%) | 56 (13.6%) | 14 (18.9%) | 61 (12.2%) | 92 (19.1%) | 23 (7.9%) |
| Ireland | 83 (23.4%) | 31 (8.7%) | 114 (10.7%) | 17 (2.5%) | 44 (12.7%) | 5 (20.7%) | 50 (13.4%) | 140 (23.8%) | 24 (8.9%) |
| Israel | 13 (11.7%) | 20 (4.5%) | 123 (10.3%) | 11 (2.3%) | 29 (13.7%) | 4 (20.5%) | 81 (13.2%) | 138 (22.6%) | 20 (8.6%) |
| Italy | 222 (12.8%) | 197 (2.6%) | 1794 (8.9%) | 171 (2.0%) | 1065 (13.2%) | 72 (17.5%) | 838 (11.2%) | 1849 (20.3%) | 241 (7.4%) |
| Jamaica | 4 (8.0%) | 2 (0.9%) | 20 (5.7%) | 1 (1.4%) | 3 (5.7%) | 1 (9.8%) | 6 (7.6%) | 2 (10.4%) | 4 (4.9%) |
| Japan | 89 (0.6%) | 329 (0.4%) | 1174 (2.4%) | 171 (0.6%) | 1100 (3.8%) | 190 (4.2%) | 696 (3.0%) | 915 (6.2%) | 71 (1.9%) |
| Jordan | 5 (11.4%) | 9 (3.4%) | 50 (10.8%) | 4 (2.4%) | 14 (12.5%) | 4 (21.6%) | 24 (13.7%) | 37 (22.8%) | 9 (9.1%) |
| Kazakhstan | 18 (3.2%) | 56 (3.0%) | 78 (8.4%) | 15 (1.9%) | 69 (9.6%) | 5 (16.8%) | 62 (10.4%) | 117 (18.4%) | 5 (6.6%) |
| Kenya | 2 (0.1%) | 1 (0.2%) | 4 (0.4%) | 0 (0.1%) | 3 (0.5%) | 1 (0.9%) | 2 (0.5%) | 1 (0.6%) | 1 (0.4%) |
| Korea, Democratic People Republic of | 15 (1.1%) | 42 (1.2%) | 62 (3.7%) | 17 (0.8%) | 246 (5.9%) | 31 (7.5%) | 41 (4.7%) | 62 (9.0%) | 3 (3.1%) |
| Korea, Republic of | 7 (0.3%) | 68 (0.3%) | 317 (3.2%) | 56 (0.8%) | 596 (5.3%) | 100 (6.2%) | 177 (4.1%) | 283 (8.5%) | 30 (2.6%) |
| Kuwait | 6 (23.8%) | 3 (4.7%) | 19 (11.3%) | 2 (2.6%) | 17 (16.1%) | 3 (21.9%) | 10 (14.1%) | 17 (24.9%) | 4 (9.3%) |
| Kyrgyzstan | 4 (3.1%) | 23 (3.5%) | 7 (7.2%) | 2 (1.7%) | 27 (9.9%) | 3 (15.4%) | 12 (9.4%) | 14 (16.1%) | 0 (6.5%) |
| Lao People's Democratic Republic | 1 (0.4%) | 1 (0.1%) | 2 (0.7%) | 0 (0.2%) | 12 (1.2%) | 1 (1.5%) | 0 (0.9%) | 1 (1.7%) | 0 (0.7%) |
| Latvia | 6 (5.9%) | 5 (1.6%) | 27 (9.4%) | 5 (2.1%) | 14 (12.4%) | 1 (18.3%) | 24 (11.6%) | 62 (21.2%) | 5 (7.7%) |
| Lebanon | 4 (11.0%) | 7 (4.2%) | 45 (9.9%) | 4 (2.3%) | 8 (8.1%) | 6 (19.7%) | 23 (12.6%) | 43 (22.3%) | 11 (8.3%) |
| Lesotho | 0 (0.7%) | 0 (0.4%) | 0 (1.3%) | 0 (0.3%) | 1 (1.8%) | 0 (0.0%) | 0 (1.8%) | 0 (4.1%) | 0 (1.1%) |
| Liberia | 0 (0.6%) | 1 (0.8%) | 1 (1.9%) | 0 (0.4%) | 10 (3.3%) | 0 (0.0%) | 1 (2.7%) | 1 (3.1%) | 0 (1.8%) |
| Libya | 6 (14.1%) | 2 (2.2%) | 24 (8.4%) | 3 (1.9%) | 25 (14.6%) | 5 (17.2%) | 14 (10.9%) | 23 (18.3%) | 3 (7.2%) |
| Lithuania | 7 (3.3%) | 6 (1.3%) | 42 (9.7%) | 7 (2.2%) | 25 (12.6%) | 3 (18.9%) | 33 (11.9%) | 87 (21.6%) | 7 (7.9%) |
| Luxembourg | 5 (19.2%) | 2 (7.2%) | 12 (10.1%) | 1 (2.3%) | 6 (14.4%) | 1 (19.8%) | 8 (12.7%) | 8 (22.1%) | 1 (8.2%) |
| Madagascar | 0 (0.0%) | 0 (0.0%) | 0 (0.0%) | 0 (0.0%) | 0 (0.0%) | 0 (0.0%) | 0 (0.0%) | 0 (0.0%) | 0 (0.0%) |
| Malawi | 2 (0.2%) | 0 (0.2%) | 1 (0.5%) | 0 (0.1%) | 2 (0.6%) | 0 (0.0%) | 0 (0.4%) | 0 (0.3%) | 0 (0.5%) |
| Malaysia | 8 (2.5%) | 8 (0.8%) | 105 (5.1%) | 20 (1.1%) | 143 (8.2%) | 9 (7.8%) | 34 (6.3%) | 82 (11.3%) | 9 (4.1%) |
| Maldives | 0 (0.0%) | 0 (3.2%) | 1 (4.5%) | 0 (0.9%) | 1 (6.0%) | 0 (0.0%) | 0 (5.9%) | 0 (12.9%) | 0 (0.0%) |
| Mali | 1 (0.6%) | 4 (0.6%) | 2 (1.3%) | 0 (0.2%) | 12 (2.0%) | 0 (2.6%) | 3 (1.9%) | 2 (1.4%) | 0 (0.7%) |
| Malta | 4 (20.7%) | 3 (5.9%) | 11 (10.6%) | 1 (2.4%) | 3 (7.3%) | 0 (21.7%) | 7 (13.2%) | 15 (24.3%) | 1 (8.6%) |
| Mauritania | 0 (1.0%) | 1 (1.0%) | 1 (2.3%) | 0 (0.5%) | 6 (3.4%) | 0 (5.3%) | 1 (3.3%) | 1 (3.5%) | 0 (2.2%) |
| Mauritius | 2 (6.1%) | 1 (1.8%) | 6 (4.4%) | 1 (1.0%) | 2 (4.8%) | 1 (8.2%) | 2 (5.6%) | 2 (11.0%) | 1 (3.7%) |
| Mexico | 152 (14.1%) | 89 (1.8%) | 543 (9.0%) | 43 (2.0%) | 384 (9.0%) | 44 (17.5%) | 318 (11.3%) | 892 (20.7%) | 98 (7.6%) |
| Moldova | 7 (6.0%) | 10 (2.6%) | 57 (8.8%) | 9 (2.0%) | 57 (12.6%) | 1 (17.6%) | 30 (10.5%) | 42 (18.9%) | 3 (7.1%) |
| Mongolia | 4 (1.9%) | 14 (2.1%) | 5 (6.4%) | 0 (1.4%) | 153 (10.6%) | 1 (13.2%) | 7 (8.6%) | 10 (14.9%) | 0 (5.4%) |
| Montenegro | 2 (11.8%) | 1 (3.2%) | 9 (9.1%) | 1 (2.0%) | 5 (12.9%) | 1 (16.7%) | 5 (11.2%) | 6 (20.8%) | 0 (7.5%) |
| Morocco | 24 (9.6%) | 22 (1.6%) | 83 (5.8%) | 15 (1.3%) | 38 (6.4%) | 16 (12.0%) | 56 (7.6%) | 48 (11.6%) | 16 (4.9%) |
| Mozambique | 0 (0.0%) | 0 (0.0%) | 0 (0.0%) | 0 (0.0%) | 1 (0.1%) | 0 (0.0%) | 0 (0.1%) | 0 (0.0%) | 0 (0.1%) |
| Myanmar | 7 (0.3%) | 3 (0.1%) | 6 (0.4%) | 1 (0.1%) | 27 (0.7%) | 3 (1.0%) | 2 (0.6%) | 4 (1.0%) | 0 (0.4%) |
| Namibia | 0 (1.1%) | 0 (0.8%) | 1 (1.7%) | 0 (0.4%) | 1 (2.0%) | 0 (0.0%) | 0 (2.6%) | 1 (3.4%) | 0 (1.7%) |
| Nepal | 0 (0.3%) | 3 (0.3%) | 3 (0.6%) | 0 (0.1%) | 4 (1.0%) | 5 (1.5%) | 1 (1.0%) | 1 (1.6%) | 0 (0.6%) |
| New Caledonia | 0 (0.0%) | 0 (0.0%) | 0 (0.0%) | 0 (0.0%) | 0 (0.0%) | 0 (0.0%) | 0 (0.0%) | 0 (0.0%) | 0 (0.0%) |
| New Zealand | 63 (23.8%) | 24 (8.4%) | 148 (10.5%) | 19 (2.4%) | 36 (15.0%) | 5 (20.3%) | 44 (13.1%) | 113 (23.8%) | 21 (8.6%) |
| Nicaragua | 4 (11.5%) | 5 (1.5%) | 16 (7.5%) | 1 (1.7%) | 24 (7.8%) | 3 (15.4%) | 11 (9.7%) | 17 (17.0%) | 1 (6.7%) |
| Niger | 0 (0.0%) | 0 (0.0%) | 0 (0.0%) | 0 (0.0%) | 0 (0.0%) | 0 (0.0%) | 0 (0.0%) | 0 (0.0%) | 0 (0.0%) |
| Nigeria | 2 (0.5%) | 3 (0.4%) | 24 (1.2%) | 4 (0.3%) | 34 (1.4%) | 2 (1.6%) | 10 (1.4%) | 6 (0.6%) | 5 (0.9%) |
| North Macedonia | 4 (12.7%) | 8 (3.1%) | 25 (9.1%) | 5 (2.1%) | 16 (13.0%) | 2 (18.1%) | 15 (11.6%) | 14 (21.7%) | 1 (7.6%) |
| Norway | 61 (22.3%) | 24 (7.1%) | 172 (9.5%) | 21 (2.2%) | 34 (11.2%) | 3 (18.7%) | 68 (11.8%) | 170 (21.5%) | 25 (7.8%) |
| Oman | 2 (7.9%) | 6 (3.0%) | 13 (6.8%) | 2 (1.6%) | 13 (10.8%) | 4 (15.2%) | 6 (8.7%) | 10 (15.1%) | 3 (6.1%) |
| Pakistan | 34 (0.7%) | 10 (0.3%) | 53 (1.8%) | 8 (0.4%) | 112 (3.3%) | 33 (4.0%) | 20 (2.4%) | 68 (4.3%) | 18 (2.0%) |
| Panama | 4 (10.2%) | 4 (1.3%) | 17 (6.5%) | 2 (1.5%) | 7 (6.1%) | 2 (13.4%) | 7 (8.0%) | 20 (15.8%) | 3 (5.4%) |
| Papua New Guinea | 0 (0.0%) | 10 (3.7%) | 9 (4.6%) | 2 (1.1%) | 32 (7.3%) | 2 (6.9%) | 4 (6.1%) | 5 (11.7%) | 1 (4.0%) |
| Paraguay | 13 (7.3%) | 5 (1.6%) | 48 (7.5%) | 3 (1.7%) | 11 (9.7%) | 1 (14.8%) | 18 (9.6%) | 24 (17.6%) | 3 (6.4%) |
| Peru | 20 (7.5%) | 28 (0.8%) | 112 (6.7%) | 7 (1.5%) | 81 (8.6%) | 37 (13.3%) | 66 (8.4%) | 203 (15.8%) | 32 (5.7%) |
| Philippines | 21 (2.0%) | 4 (0.2%) | 74 (1.0%) | 10 (0.2%) | 144 (1.6%) | 3 (2.1%) | 26 (1.3%) | 54 (2.8%) | 4 (0.9%) |
| Poland | 124 (7.8%) | 107 (2.4%) | 833 (9.9%) | 155 (2.2%) | 191 (12.3%) | 59 (19.2%) | 354 (12.3%) | 752 (22.2%) | 94 (8.2%) |
| Portugal | 68 (11.4%) | 69 (3.2%) | 318 (8.3%) | 41 (1.9%) | 137 (10.8%) | 9 (16.3%) | 115 (10.4%) | 201 (19.1%) | 37 (6.9%) |
| Puerto Rico | 16 (13.8%) | 3 (2.8%) | 67 (9.8%) | 6 (2.2%) | 43 (14.1%) | 1 (18.2%) | 25 (12.1%) | 36 (22.5%) | 8 (7.9%) |
| Qatar | 3 (27.7%) | 2 (4.4%) | 8 (10.6%) | 1 (2.4%) | 8 (16.7%) | 1 (20.7%) | 3 (13.7%) | 6 (23.2%) | 2 (8.3%) |
| Romania | 42 (6.7%) | 34 (1.3%) | 447 (10.0%) | 79 (2.3%) | 355 (15.0%) | 20 (19.3%) | 227 (12.3%) | 354 (21.7%) | 33 (8.2%) |
| Russian Federation | 338 (4.8%) | 560 (2.6%) | 1818 (7.8%) | 266 (1.7%) | 859 (12.4%) | 93 (15.1%) | 1013 (9.6%) | 2904 (17.2%) | 134 (6.3%) |
| Rwanda | 0 (0.0%) | 0 (0.0%) | 0 (0.0%) | 0 (0.0%) | 0 (0.0%) | 0 (0.0%) | 0 (0.0%) | 0 (0.0%) | 0 (0.0%) |
| Saint Lucia | 1 (19.0%) | 0 (2.5%) | 2 (11.7%) | 0 (2.7%) | 0 (13.8%) | 0 (0.0%) | 1 (14.7%) | 1 (26.3%) | 0 (9.9%) |
| Samoa | 0 (0.0%) | 1 (13.0%) | 2 (15.3%) | 0 (3.5%) | 2 (23.7%) | 0 (0.0%) | 1 (19.4%) | 2 (33.3%) | 0 (11.8%) |
| Sao Tome and Principe | 0 (0.0%) | 0 (1.2%) | 0 (3.8%) | 0 (0.9%) | 0 (4.3%) | 0 (0.0%) | 0 (4.5%) | 0 (0.0%) | 0 (0.0%) |
| Saudi Arabia | 19 (11.1%) | 25 (5.0%) | 133 (10.0%) | 25 (2.3%) | 144 (15.4%) | 14 (19.8%) | 52 (12.7%) | 123 (21.6%) | 17 (8.2%) |
| Senegal | 0 (0.2%) | 1 (0.2%) | 1 (0.5%) | 0 (0.1%) | 4 (0.7%) | 0 (1.3%) | 1 (0.7%) | 1 (0.6%) | 0 (0.5%) |
| Serbia | 24 (11.7%) | 17 (2.0%) | 136 (8.4%) | 33 (1.9%) | 33 (6.4%) | 11 (16.6%) | 77 (10.6%) | 123 (19.3%) | 14 (7.1%) |
| Sierra Leone | 0 (0.0%) | 0 (0.1%) | 0 (0.2%) | 0 (0.0%) | 0 (0.2%) | 0 (0.0%) | 0 (0.4%) | 0 (0.0%) | 0 (0.0%) |
| Singapore | 4 (2.0%) | 10 (1.7%) | 54 (4.0%) | 8 (0.9%) | 65 (6.0%) | 4 (7.7%) | 27 (5.0%) | 53 (9.7%) | 5 (3.3%) |
| Slovakia | 18 (6.8%) | 12 (2.5%) | 140 (10.4%) | 25 (2.3%) | 43 (12.7%) | 9 (20.3%) | 66 (12.8%) | 176 (23.0%) | 14 (8.5%) |
| Slovenia | 5 (6.6%) | 9 (3.3%) | 44 (8.0%) | 7 (1.8%) | 25 (10.6%) | 4 (15.6%) | 26 (10.1%) | 51 (18.9%) | 6 (6.6%) |
| Solomon Islands | 0 (0.0%) | 0 (4.8%) | 0 (4.5%) | 0 (1.5%) | 3 (8.4%) | 0 (0.0%) | 0 (6.4%) | 0 (0.0%) | 0 (5.3%) |
| Somalia | 1 (0.4%) | 1 (0.3%) | 2 (0.8%) | 0 (0.2%) | 2 (1.3%) | 0 (1.7%) | 1 (1.0%) | 2 (1.3%) | 0 (0.7%) |
| South Africa | 13 (0.7%) | 29 (2.5%) | 114 (6.0%) | 22 (1.3%) | 126 (8.6%) | 8 (11.2%) | 101 (7.7%) | 101 (12.2%) | 29 (4.9%) |
| South Sudan | 0 (0.0%) | 0 (0.0%) | 0 (0.0%) | 0 (0.0%) | 0 (0.0%) | 0 (0.0%) | 0 (0.0%) | 0 (0.0%) | 0 (0.0%) |
| Spain | 238 (13.1%) | 155 (3.6%) | 1527 (10.0%) | 186 (2.3%) | 637 (14.1%) | 52 (19.3%) | 538 (12.4%) | 1332 (22.4%) | 148 (8.2%) |
| Sri Lanka | 2 (0.2%) | 1 (0.2%) | 2 (0.5%) | 1 (0.1%) | 2 (0.6%) | 1 (1.3%) | 1 (0.7%) | 4 (1.4%) | 1 (0.4%) |
| Sudan | 19 (4.4%) | 2 (0.7%) | 9 (1.9%) | 2 (0.5%) | 36 (4.4%) | 3 (5.6%) | 5 (3.4%) | 13 (4.4%) | 3 (1.9%) |
| Suriname | 0 (7.3%) | 0 (1.2%) | 3 (6.3%) | 0 (1.3%) | 2 (6.9%) | 0 (13.1%) | 1 (7.4%) | 1 (11.9%) | 0 (5.1%) |
| Sweden | 90 (19.9%) | 35 (6.6%) | 220 (8.8%) | 30 (2.0%) | 84 (12.5%) | 11 (17.0%) | 126 (11.0%) | 227 (19.8%) | 40 (7.3%) |
| Switzerland | 90 (18.6%) | 49 (7.4%) | 167 (9.4%) | 22 (2.1%) | 104 (13.4%) | 12 (18.4%) | 111 (11.8%) | 160 (21.0%) | 29 (7.9%) |
| Syrian Arab Republic | 6 (10.2%) | 17 (3.9%) | 47 (9.2%) | 3 (2.0%) | 28 (13.3%) | 11 (18.3%) | 46 (11.8%) | 59 (20.3%) | 15 (7.9%) |
| Tajikistan | 2 (2.6%) | 23 (3.3%) | 6 (5.9%) | 1 (1.3%) | 12 (8.1%) | 1 (13.5%) | 3 (7.4%) | 12 (12.5%) | 1 (5.3%) |
| Tanzania, United Republic of | 8 (0.3%) | 2 (0.3%) | 3 (0.5%) | 0 (0.1%) | 6 (0.9%) | 1 (1.5%) | 2 (0.8%) | 3 (0.7%) | 1 (0.6%) |
| Thailand | 25 (0.9%) | 9 (0.4%) | 134 (2.4%) | 25 (0.5%) | 555 (2.9%) | 44 (4.5%) | 60 (3.0%) | 83 (6.2%) | 15 (2.1%) |
| The Netherlands | 449 (22.1%) | 54 (4.9%) | 541 (8.4%) | 65 (1.9%) | 100 (10.5%) | 10 (16.4%) | 185 (10.5%) | 364 (18.9%) | 65 (6.9%) |
| The Republic of the Gambia | 0 (0.8%) | 0 (0.8%) | 0 (1.9%) | 0 (0.4%) | 5 (2.1%) | 0 (0.0%) | 0 (3.4%) | 0 (0.0%) | 0 (0.0%) |
| Timor-Leste | 0 (0.0%) | 0 (0.0%) | 0 (0.0%) | 0 (0.0%) | 0 (0.0%) | 0 (0.0%) | 0 (0.0%) | 0 (0.0%) | 0 (0.0%) |
| Togo | 0 (0.3%) | 1 (0.3%) | 1 (0.7%) | 0 (0.2%) | 1 (1.1%) | 0 (1.3%) | 0 (1.1%) | 1 (1.7%) | 0 (0.9%) |
| Trinidad and Tobago | 1 (4.7%) | 1 (1.6%) | 12 (8.4%) | 1 (1.9%) | 3 (7.7%) | 0 (16.0%) | 7 (10.6%) | 9 (18.5%) | 2 (7.1%) |
| Tunisia | 5 (10.2%) | 3 (1.0%) | 32 (6.3%) | 5 (1.4%) | 33 (9.5%) | 9 (13.0%) | 25 (8.1%) | 26 (14.1%) | 6 (5.3%) |
| Turkmenistan | 6 (3.1%) | 17 (4.1%) | 4 (7.9%) | 1 (1.7%) | 20 (10.4%) | 2 (16.3%) | 8 (10.4%) | 22 (16.8%) | 2 (6.7%) |
| T�rkiye | 67 (9.3%) | 331 (4.1%) | 654 (9.4%) | 98 (2.1%) | 450 (13.9%) | 49 (18.5%) | 599 (11.9%) | 715 (20.9%) | 114 (7.9%) |
| Uganda | 0 (0.0%) | 0 (0.0%) | 0 (0.0%) | 0 (0.0%) | 0 (0.0%) | 0 (0.0%) | 0 (0.0%) | 0 (0.0%) | 0 (0.0%) |
| Ukraine | 93 (4.1%) | 110 (2.3%) | 466 (8.8%) | 99 (2.0%) | 129 (9.9%) | 21 (16.9%) | 327 (11.0%) | 687 (20.0%) | 34 (7.3%) |
| United Arab Emirates | 3 (11.1%) | 5 (4.2%) | 22 (10.1%) | 3 (2.3%) | 8 (13.4%) | 2 (20.0%) | 7 (12.2%) | 18 (22.4%) | 4 (8.6%) |
| United Kingdom | 1676 (25.8%) | 258 (6.7%) | 1605 (9.8%) | 216 (2.2%) | 597 (12.1%) | 72 (19.0%) | 711 (12.3%) | 1942 (22.3%) | 309 (8.1%) |
| United States of America | 4231 (28.7%) | 1390 (9.0%) | 6177 (11.5%) | 727 (2.7%) | 5476 (17.6%) | 345 (22.1%) | 4544 (14.4%) | 12084 (26.0%) | 1743 (9.5%) |
| Uruguay | 19 (9.7%) | 7 (1.9%) | 61 (9.1%) | 7 (2.1%) | 19 (14.0%) | 7 (18.0%) | 42 (11.5%) | 109 (21.2%) | 6 (7.6%) |
| Uzbekistan | 21 (3.0%) | 72 (3.8%) | 45 (7.8%) | 13 (1.7%) | 100 (10.1%) | 5 (14.1%) | 58 (9.6%) | 77 (15.7%) | 1 (5.2%) |
| Vanuatu | 0 (0.0%) | 0 (6.9%) | 0 (7.2%) | 0 (1.6%) | 2 (9.5%) | 0 (0.0%) | 0 (9.3%) | 0 (0.0%) | 0 (6.1%) |
| Venezuela | 25 (7.1%) | 28 (1.5%) | 166 (7.5%) | 19 (1.7%) | 71 (9.5%) | 9 (14.4%) | 68 (9.5%) | 258 (18.1%) | 16 (6.4%) |
| Viet Nam | 0 (0.0%) | 0 (0.0%) | 0 (0.0%) | 0 (0.0%) | 0 (0.0%) | 0 (0.0%) | 0 (0.0%) | 0 (0.0%) | 0 (0.0%) |
| Yemen | 11 (3.5%) | 6 (1.2%) | 10 (2.3%) | 2 (0.5%) | 20 (4.4%) | 0 (6.0%) | 5 (2.9%) | 3 (2.6%) | 0 (2.1%) |
| Zambia | 0 (0.0%) | 0 (0.0%) | 0 (0.0%) | 0 (0.0%) | 0 (0.0%) | 0 (0.1%) | 0 (0.0%) | 0 (0.0%) | 0 (0.0%) |
| Zimbabwe | 1 (0.3%) | 1 (0.2%) | 1 (0.6%) | 0 (0.1%) | 3 (0.8%) | 0 (1.2%) | 1 (0.7%) | 1 (0.9%) | 0 (0.5%) |

## Insufficient physical activity

**Table 5.5.1.** Proportion and number of insufficient physical activity-related cancer cases attributable to insufficient physical activity, women and men, 20+ years

| **Country** | **Women** | | | **Men** | | |
| --- | --- | --- | --- | --- | --- | --- |
| **N** | **PAF insuff. PA** | **PAF all** | **N** | **PAF insuff. PA** | **PAF all** |
| Afghanistan | 344 | 7.9% | 0.9% | 10 | 3.9% | 0.1% |
| Albania | 81 | 6.0% | 0.8% | 6 | 3.9% | 0.1% |
| Algeria | 1294 | 7.5% | 1.2% | 98 | 4.1% | 0.3% |
| Angola | 162 | 4.6% | 0.4% | 6 | 3.1% | 0.1% |
| Argentina | 2488 | 8.3% | 1.2% | 507 | 7.4% | 0.8% |
| Armenia | 90 | 4.8% | 0.7% | 21 | 5.4% | 0.4% |
| Australia | 2089 | 6.7% | 1.0% | 289 | 5.1% | 0.4% |
| Austria | 570 | 6.9% | 0.9% | 87 | 5.3% | 0.4% |
| Azerbaijan | 157 | 5.1% | 0.6% | 22 | 4.7% | 0.2% |
| Bahamas | 22 | 8.5% | 1.6% | 2 | 5.4% | 0.4% |
| Bahrain | 33 | 8.1% | 1.5% | 5 | 7.7% | 0.8% |
| Bangladesh | 1004 | 6.6% | 0.5% | 54 | 3.4% | 0.1% |
| Barbados | 20 | 7.5% | 1.2% | 3 | 6.3% | 0.5% |
| Belarus | 270 | 2.9% | 0.4% | 57 | 3.4% | 0.2% |
| Belgium | 1402 | 9.1% | 1.4% | 191 | 6.7% | 0.5% |
| Belize | 10 | 10.0% | 1.6% | 1 | 11.1% | 0.6% |
| Benin | 66 | 4.1% | 0.6% | 6 | 3.4% | 0.2% |
| Bhutan | 1 | 3.8% | 0.1% | 0 | 0.0% | 0.0% |
| Bolivia | 134 | 5.4% | 0.5% | 12 | 4.0% | 0.2% |
| Bosnia Herzegovina | 117 | 5.0% | 0.6% | 18 | 3.3% | 0.2% |
| Botswana | 20 | 6.3% | 0.5% | 1 | 4.5% | 0.1% |
| Brazil | 10877 | 8.8% | 1.2% | 1170 | 7.1% | 0.4% |
| Brunei Darussalam | 15 | 8.0% | 1.0% | 2 | 4.8% | 0.5% |
| Bulgaria | 343 | 5.6% | 0.8% | 103 | 5.5% | 0.6% |
| Burkina Faso | 73 | 3.8% | 0.3% | 2 | 2.5% | 0.0% |
| Burundi | 36 | 3.6% | 0.3% | 3 | 3.6% | 0.1% |
| Cambodia | 105 | 3.6% | 0.3% | 12 | 2.7% | 0.1% |
| Cameroon | 244 | 5.3% | 0.7% | 10 | 4.1% | 0.1% |
| Canada | 3962 | 8.5% | 1.2% | 554 | 6.6% | 0.5% |
| Cape Verde | 5 | 6.3% | 0.8% | 1 | 8.3% | 0.5% |
| Central African Republic | 29 | 4.6% | 0.6% | 1 | 2.8% | 0.1% |
| Chad | 40 | 4.8% | 0.3% | 3 | 4.6% | 0.1% |
| Chile | 708 | 7.7% | 0.9% | 119 | 5.6% | 0.4% |
| China | 36898 | 6.7% | 0.5% | 8138 | 5.3% | 0.3% |
| Colombia | 1803 | 7.5% | 1.0% | 203 | 5.6% | 0.4% |
| Comoros | 3 | 4.1% | 0.3% | 0 | 0.0% | 0.0% |
| Congo, Democratic Republic of | 352 | 4.2% | 0.4% | 18 | 2.9% | 0.1% |
| Congo, Republic of | 29 | 5.0% | 0.6% | 1 | 2.9% | 0.1% |
| Costa Rica | 208 | 9.5% | 1.2% | 26 | 8.4% | 0.4% |
| Croatia | 240 | 4.8% | 0.6% | 65 | 4.3% | 0.4% |
| Cuba | 1176 | 12.5% | 1.9% | 138 | 8.2% | 0.6% |
| Cyprus | 137 | 9.9% | 1.5% | 18 | 8.0% | 0.6% |
| Czechia | 645 | 5.6% | 0.8% | 120 | 4.9% | 0.4% |
| C�te d'Ivoire | 252 | 5.7% | 0.7% | 15 | 3.8% | 0.2% |
| Denmark | 371 | 4.4% | 0.6% | 106 | 4.1% | 0.5% |
| Djibouti | 10 | 4.9% | 0.7% | 1 | 5.9% | 0.3% |
| Dominican Republic | 374 | 8.9% | 1.3% | 47 | 6.1% | 0.4% |
| Ecuador | 315 | 5.6% | 0.6% | 32 | 3.8% | 0.2% |
| Egypt | 2497 | 8.1% | 1.1% | 113 | 6.1% | 0.2% |
| El Salvador | 180 | 8.8% | 1.1% | 15 | 6.5% | 0.4% |
| Equatorial Guinea | 12 | 6.1% | 0.8% | 1 | 5.9% | 0.2% |
| Eritrea | 22 | 3.8% | 0.5% | 1 | 2.2% | 0.1% |
| Estonia | 43 | 2.9% | 0.4% | 11 | 3.4% | 0.3% |
| Eswatini | 7 | 6.0% | 0.3% | 0 | 0.0% | 0.0% |
| Ethiopia | 653 | 3.3% | 0.4% | 30 | 1.7% | 0.1% |
| Fiji | 19 | 5.0% | 0.7% | 1 | 3.9% | 0.2% |
| Finland | 263 | 3.5% | 0.5% | 49 | 3.9% | 0.3% |
| France (metropolitan) | 7123 | 7.8% | 1.2% | 1007 | 5.9% | 0.4% |
| France, Guadeloupe | 0 | 0.0% | 0.0% | 0 | 0.0% | 0.0% |
| France, La R�union | 0 | 0.0% | 0.0% | 0 | 0.0% | 0.0% |
| France, Martinique | 0 | 0.0% | 0.0% | 0 | 0.0% | 0.0% |
| French Guyana | 0 | 0.0% | 0.0% | 0 | 0.0% | 0.0% |
| French Polynesia | 0 | 0.0% | 0.0% | 0 | 0.0% | 0.0% |
| Gabon | 22 | 5.8% | 0.7% | 2 | 5.4% | 0.3% |
| Gaza Strip and West Bank | 94 | 8.5% | 1.3% | 12 | 6.4% | 0.5% |
| Georgia | 98 | 4.1% | 0.5% | 12 | 4.3% | 0.2% |
| Germany | 4108 | 3.9% | 0.5% | 691 | 3.5% | 0.2% |
| Ghana | 267 | 4.7% | 0.6% | 6 | 4.2% | 0.1% |
| Greece | 1036 | 7.5% | 1.2% | 239 | 6.5% | 0.7% |
| Guam | 0 | 0.0% | 0.0% | 0 | 0.0% | 0.0% |
| Guatemala | 165 | 5.8% | 0.6% | 16 | 4.2% | 0.2% |
| Guinea | 39 | 4.7% | 0.2% | 1 | 2.4% | 0.0% |
| Guinea-Bissau | 9 | 4.3% | 0.4% | 0 | 0.0% | 0.0% |
| Guyana | 22 | 7.6% | 1.1% | 2 | 5.4% | 0.4% |
| Haiti | 141 | 7.0% | 0.7% | 14 | 4.1% | 0.2% |
| Honduras | 130 | 8.6% | 0.8% | 10 | 6.2% | 0.2% |
| Hungary | 807 | 6.7% | 0.9% | 160 | 4.7% | 0.5% |
| Iceland | 26 | 7.6% | 1.1% | 4 | 5.3% | 0.5% |
| India | 20887 | 9.4% | 1.0% | 1456 | 6.7% | 0.2% |
| Indonesia | 3020 | 3.7% | 0.5% | 430 | 3.9% | 0.2% |
| Iran, Islamic Republic of | 2206 | 10.6% | 1.2% | 316 | 6.4% | 0.4% |
| Iraq | 1101 | 11.1% | 1.7% | 75 | 8.6% | 0.5% |
| Ireland | 433 | 8.3% | 1.2% | 60 | 5.7% | 0.4% |
| Israel | 490 | 7.3% | 1.0% | 71 | 5.9% | 0.5% |
| Italy | 8585 | 10.0% | 1.5% | 1621 | 8.1% | 0.8% |
| Jamaica | 149 | 7.3% | 1.3% | 22 | 6.1% | 0.6% |
| Japan | 14681 | 9.3% | 1.2% | 3546 | 7.2% | 0.6% |
| Jordan | 184 | 5.5% | 0.9% | 30 | 6.4% | 0.5% |
| Kazakhstan | 295 | 4.3% | 0.5% | 48 | 5.1% | 0.3% |
| Kenya | 227 | 2.5% | 0.3% | 19 | 2.1% | 0.1% |
| Korea, Democratic People Republic of | 826 | 9.7% | 0.9% | 77 | 4.6% | 0.3% |
| Korea, Republic of | 4090 | 11.4% | 1.3% | 807 | 8.2% | 0.6% |
| Kuwait | 138 | 12.1% | 2.1% | 22 | 12.8% | 1.0% |
| Kyrgyzstan | 53 | 4.4% | 0.5% | 3 | 3.1% | 0.1% |
| Lao People's Democratic Republic | 70 | 5.2% | 0.5% | 5 | 2.2% | 0.1% |
| Latvia | 71 | 3.6% | 0.4% | 11 | 3.8% | 0.2% |
| Lebanon | 297 | 10.9% | 1.6% | 48 | 10.4% | 0.8% |
| Lesotho | 5 | 2.1% | 0.1% | 1 | 3.1% | 0.1% |
| Liberia | 37 | 5.2% | 0.5% | 2 | 4.2% | 0.1% |
| Libya | 151 | 9.6% | 1.2% | 21 | 7.5% | 0.5% |
| Lithuania | 122 | 4.2% | 0.6% | 21 | 4.8% | 0.2% |
| Luxembourg | 36 | 5.1% | 0.8% | 5 | 4.1% | 0.3% |
| Madagascar | 114 | 3.5% | 0.3% | 4 | 2.5% | 0.0% |
| Malawi | 30 | 1.8% | 0.1% | 1 | 0.9% | 0.0% |
| Malaysia | 1071 | 9.1% | 1.3% | 164 | 7.9% | 0.7% |
| Maldives | 6 | 5.8% | 0.9% | 1 | 5.9% | 0.4% |
| Mali | 212 | 8.0% | 0.7% | 11 | 6.2% | 0.2% |
| Malta | 57 | 9.8% | 1.5% | 10 | 9.7% | 0.7% |
| Mauritania | 80 | 11.7% | 1.4% | 4 | 8.3% | 0.3% |
| Mauritius | 49 | 6.1% | 1.0% | 8 | 6.0% | 0.7% |
| Mexico | 2345 | 5.5% | 0.7% | 318 | 5.2% | 0.4% |
| Moldova | 66 | 2.5% | 0.4% | 19 | 3.0% | 0.3% |
| Mongolia | 15 | 4.5% | 0.2% | 3 | 3.8% | 0.1% |
| Montenegro | 30 | 5.2% | 0.8% | 4 | 4.3% | 0.3% |
| Morocco | 938 | 6.2% | 1.0% | 56 | 3.9% | 0.2% |
| Mozambique | 49 | 2.0% | 0.1% | 1 | 1.6% | 0.0% |
| Myanmar | 678 | 6.8% | 0.6% | 58 | 4.2% | 0.2% |
| Namibia | 50 | 7.7% | 0.9% | 2 | 4.7% | 0.1% |
| Nepal | 71 | 2.6% | 0.2% | 10 | 2.2% | 0.1% |
| New Caledonia | 0 | 0.0% | 0.0% | 0 | 0.0% | 0.0% |
| New Zealand | 295 | 5.2% | 0.8% | 57 | 4.0% | 0.4% |
| Nicaragua | 133 | 8.0% | 1.0% | 14 | 6.6% | 0.4% |
| Niger | 115 | 4.6% | 0.6% | 7 | 3.4% | 0.1% |
| Nigeria | 1733 | 4.9% | 0.7% | 77 | 3.9% | 0.2% |
| North Macedonia | 101 | 6.4% | 1.0% | 11 | 4.0% | 0.3% |
| Norway | 616 | 8.3% | 1.2% | 125 | 6.9% | 0.6% |
| Oman | 60 | 9.2% | 1.3% | 14 | 7.1% | 0.6% |
| Pakistan | 3516 | 9.8% | 1.2% | 172 | 5.6% | 0.2% |
| Panama | 168 | 9.5% | 1.4% | 23 | 8.6% | 0.6% |
| Papua New Guinea | 83 | 4.0% | 0.4% | 5 | 2.7% | 0.1% |
| Paraguay | 188 | 6.4% | 0.9% | 37 | 5.8% | 0.6% |
| Peru | 776 | 6.9% | 0.7% | 98 | 5.9% | 0.3% |
| Philippines | 3427 | 7.7% | 1.1% | 358 | 5.1% | 0.4% |
| Poland | 2873 | 7.3% | 1.0% | 512 | 6.1% | 0.5% |
| Portugal | 1421 | 10.6% | 1.6% | 351 | 9.2% | 1.0% |
| Puerto Rico | 233 | 7.9% | 1.3% | 50 | 7.3% | 0.7% |
| Qatar | 37 | 11.8% | 1.9% | 7 | 9.7% | 0.6% |
| Romania | 1173 | 6.4% | 0.9% | 254 | 5.7% | 0.5% |
| Russian Federation | 3719 | 2.7% | 0.4% | 751 | 3.2% | 0.3% |
| Rwanda | 32 | 3.5% | 0.3% | 2 | 2.3% | 0.1% |
| Saint Lucia | 4 | 4.7% | 0.7% | 1 | 7.1% | 0.4% |
| Samoa | 6 | 5.6% | 1.0% | 1 | 7.1% | 0.5% |
| Sao Tome and Principe | 1 | 4.5% | 0.5% | 0 | 0.0% | 0.0% |
| Saudi Arabia | 603 | 11.2% | 1.5% | 138 | 10.3% | 0.9% |
| Senegal | 111 | 5.2% | 0.5% | 4 | 2.9% | 0.1% |
| Serbia | 883 | 12.2% | 1.6% | 141 | 8.7% | 0.6% |
| Sierra Leone | 9 | 4.3% | 0.3% | 0 | 0.0% | 0.0% |
| Singapore | 275 | 5.0% | 0.8% | 71 | 5.2% | 0.5% |
| Slovakia | 301 | 5.1% | 0.8% | 70 | 5.2% | 0.4% |
| Slovenia | 125 | 5.1% | 0.7% | 21 | 3.8% | 0.3% |
| Solomon Islands | 9 | 5.6% | 0.7% | 0 | 0.0% | 0.0% |
| Somalia | 112 | 5.2% | 0.6% | 7 | 3.3% | 0.2% |
| South Africa | 2132 | 11.7% | 1.3% | 179 | 9.4% | 0.4% |
| South Sudan | 55 | 4.4% | 0.5% | 3 | 3.0% | 0.1% |
| Spain | 3767 | 7.2% | 1.1% | 934 | 6.1% | 0.6% |
| Sri Lanka | 416 | 7.0% | 0.8% | 23 | 4.8% | 0.1% |
| Sudan | 382 | 5.2% | 0.7% | 17 | 3.7% | 0.2% |
| Suriname | 24 | 10.6% | 1.5% | 4 | 8.5% | 0.7% |
| Sweden | 460 | 4.0% | 0.5% | 89 | 3.6% | 0.3% |
| Switzerland | 555 | 5.9% | 0.8% | 84 | 4.7% | 0.3% |
| Syrian Arab Republic | 445 | 8.2% | 1.3% | 34 | 6.6% | 0.3% |
| Tajikistan | 85 | 7.6% | 0.8% | 5 | 4.8% | 0.2% |
| Tanzania, United Republic of | 92 | 1.8% | 0.1% | 8 | 1.6% | 0.0% |
| Thailand | 1765 | 5.7% | 0.6% | 260 | 4.7% | 0.3% |
| The Netherlands | 905 | 3.8% | 0.5% | 186 | 2.9% | 0.3% |
| The Republic of the Gambia | 6 | 5.0% | 0.3% | 0 | 0.0% | 0.0% |
| Timor-Leste | 11 | 6.6% | 0.8% | 1 | 4.3% | 0.3% |
| Togo | 38 | 3.2% | 0.4% | 4 | 2.9% | 0.2% |
| Trinidad and Tobago | 76 | 8.3% | 1.3% | 10 | 7.2% | 0.5% |
| Tunisia | 255 | 7.0% | 1.0% | 27 | 5.4% | 0.2% |
| Turkmenistan | 43 | 3.5% | 0.4% | 2 | 3.5% | 0.1% |
| T�rkiye | 4157 | 10.4% | 1.3% | 495 | 7.1% | 0.4% |
| Uganda | 67 | 1.8% | 0.1% | 6 | 1.4% | 0.0% |
| Ukraine | 681 | 2.1% | 0.3% | 139 | 2.6% | 0.2% |
| United Arab Emirates | 180 | 12.6% | 2.1% | 25 | 11.6% | 1.0% |
| United Kingdom | 6220 | 7.4% | 1.0% | 906 | 5.6% | 0.4% |
| United States of America | 35406 | 9.0% | 1.3% | 3188 | 5.9% | 0.3% |
| Uruguay | 244 | 7.5% | 1.1% | 42 | 6.2% | 0.5% |
| Uzbekistan | 303 | 4.6% | 0.5% | 21 | 3.7% | 0.1% |
| Vanuatu | 1 | 2.0% | 0.2% | 0 | 0.0% | 0.0% |
| Venezuela | 1220 | 10.3% | 1.4% | 174 | 7.9% | 0.6% |
| Viet Nam | 1998 | 6.2% | 0.8% | 193 | 4.4% | 0.2% |
| Yemen | 227 | 6.7% | 0.8% | 20 | 4.7% | 0.3% |
| Zambia | 55 | 4.5% | 0.2% | 3 | 3.0% | 0.0% |
| Zimbabwe | 108 | 4.6% | 0.3% | 6 | 3.2% | 0.1% |

**Table 5.5.2.** Proportion and number of cancer cases attributable to insufficient physical activity by cancer site, women and men, 20+ years,

| **Country** | **Women** | | | **Men** |
| --- | --- | --- | --- | --- |
| **Colon** | **Breast** | **Corpus uteri** | **Colon** |
| **N (PAF)** | **N (PAF)** | **N (PAF)** | **N (PAF)** |
| Afghanistan | 12 (4.2%) | 300 (8.5%) | 32 (6.3%) | 10 (3.9%) |
| Albania | 3 (2.7%) | 60 (5.9%) | 18 (8.0%) | 6 (3.9%) |
| Algeria | 87 (4.1%) | 1151 (7.9%) | 57 (9.6%) | 98 (4.1%) |
| Angola | 6 (2.5%) | 150 (5.2%) | 6 (1.7%) | 6 (3.1%) |
| Argentina | 254 (4.4%) | 1854 (8.6%) | 380 (14.1%) | 507 (7.4%) |
| Armenia | 14 (2.9%) | 59 (5.8%) | 17 (4.6%) | 21 (5.4%) |
| Australia | 196 (3.4%) | 1483 (6.8%) | 410 (12.2%) | 289 (5.1%) |
| Austria | 41 (3.2%) | 377 (6.3%) | 152 (15.8%) | 87 (5.3%) |
| Azerbaijan | 16 (2.9%) | 122 (5.6%) | 19 (5.6%) | 22 (4.7%) |
| Bahamas | 2 (7.1%) | 18 (10.5%) | 2 (3.4%) | 2 (5.4%) |
| Bahrain | 2 (5.4%) | 29 (9.0%) | 2 (4.4%) | 5 (7.7%) |
| Bangladesh | 36 (3.1%) | 788 (6.1%) | 180 (18.1%) | 54 (3.4%) |
| Barbados | 3 (6.0%) | 15 (10.3%) | 2 (2.9%) | 3 (6.3%) |
| Belarus | 39 (2.0%) | 207 (4.0%) | 24 (1.0%) | 57 (3.4%) |
| Belgium | 123 (4.6%) | 998 (8.9%) | 281 (20.1%) | 191 (6.7%) |
| Belize | 1 (8.3%) | 8 (9.4%) | 1 (33.3%) | 1 (11.1%) |
| Benin | 3 (2.6%) | 61 (4.6%) | 2 (1.2%) | 6 (3.4%) |
| Bhutan | 0 (0.0%) | 0 (0.0%) | 1 (25.0%) | 0 (0.0%) |
| Bolivia | 8 (3.1%) | 102 (6.1%) | 24 (4.5%) | 12 (4.0%) |
| Bosnia Herzegovina | 11 (2.6%) | 77 (5.0%) | 29 (8.1%) | 18 (3.3%) |
| Botswana | 1 (5.0%) | 18 (7.0%) | 1 (2.4%) | 1 (4.5%) |
| Brazil | 777 (4.6%) | 8383 (8.9%) | 1717 (13.6%) | 1170 (7.1%) |
| Brunei Darussalam | 1 (3.1%) | 10 (7.6%) | 4 (16.7%) | 2 (4.8%) |
| Bulgaria | 46 (3.3%) | 229 (6.4%) | 68 (5.7%) | 103 (5.5%) |
| Burkina Faso | 4 (2.2%) | 58 (4.2%) | 11 (3.0%) | 2 (2.5%) |
| Burundi | 1 (1.5%) | 32 (3.7%) | 3 (4.2%) | 3 (3.6%) |
| Cambodia | 9 (1.7%) | 70 (3.3%) | 26 (10.0%) | 12 (2.7%) |
| Cameroon | 6 (2.7%) | 231 (5.5%) | 7 (3.4%) | 10 (4.1%) |
| Canada | 285 (4.0%) | 2485 (7.8%) | 1191 (15.1%) | 554 (6.6%) |
| Cape Verde | 0 (0.0%) | 5 (7.5%) | 0 (0.0%) | 1 (8.3%) |
| Central African Republic | 1 (2.9%) | 27 (4.7%) | 1 (4.0%) | 1 (2.8%) |
| Chad | 1 (2.0%) | 38 (5.1%) | 1 (2.5%) | 3 (4.6%) |
| Chile | 107 (4.2%) | 457 (8.1%) | 144 (14.0%) | 119 (5.6%) |
| China | 2642 (2.3%) | 16108 (4.5%) | 18148 (23.4%) | 8138 (5.3%) |
| Colombia | 168 (4.2%) | 1389 (8.2%) | 246 (8.1%) | 203 (5.6%) |
| Comoros | 0 (0.0%) | 3 (4.6%) | 0 (0.0%) | 0 (0.0%) |
| Congo, Democratic Republic of | 12 (2.2%) | 322 (4.4%) | 18 (3.8%) | 18 (2.9%) |
| Congo, Republic of | 1 (3.0%) | 27 (5.1%) | 1 (4.8%) | 1 (2.9%) |
| Costa Rica | 28 (6.2%) | 160 (11.9%) | 20 (5.2%) | 26 (8.4%) |
| Croatia | 27 (2.5%) | 155 (5.0%) | 58 (7.0%) | 65 (4.3%) |
| Cuba | 151 (6.7%) | 655 (12.7%) | 370 (18.6%) | 138 (8.2%) |
| Cyprus | 10 (5.7%) | 109 (10.7%) | 18 (9.6%) | 18 (8.0%) |
| Czechia | 61 (2.9%) | 442 (5.7%) | 142 (8.3%) | 120 (4.9%) |
| C�te d'Ivoire | 9 (3.1%) | 237 (6.1%) | 6 (2.1%) | 15 (3.8%) |
| Denmark | 47 (2.1%) | 218 (4.1%) | 106 (11.6%) | 106 (4.1%) |
| Djibouti | 0 (0.0%) | 9 (5.0%) | 1 (10.0%) | 1 (5.9%) |
| Dominican Republic | 34 (4.4%) | 278 (8.6%) | 62 (29.7%) | 47 (6.1%) |
| Ecuador | 29 (3.1%) | 243 (6.2%) | 43 (5.5%) | 32 (3.8%) |
| Egypt | 79 (4.3%) | 2247 (8.4%) | 171 (8.3%) | 113 (6.1%) |
| El Salvador | 14 (4.7%) | 147 (9.1%) | 19 (15.3%) | 15 (6.5%) |
| Equatorial Guinea | 0 (0.0%) | 11 (6.3%) | 1 (8.3%) | 1 (5.9%) |
| Eritrea | 1 (2.4%) | 20 (4.0%) | 1 (3.2%) | 1 (2.2%) |
| Estonia | 6 (1.7%) | 29 (3.4%) | 8 (3.2%) | 11 (3.4%) |
| Eswatini | 0 (0.0%) | 6 (5.7%) | 1 (50.0%) | 0 (0.0%) |
| Ethiopia | 30 (1.7%) | 580 (3.4%) | 43 (4.9%) | 30 (1.7%) |
| Fiji | 1 (4.3%) | 17 (5.9%) | 1 (1.5%) | 1 (3.9%) |
| Finland | 24 (1.8%) | 194 (3.6%) | 45 (4.9%) | 49 (3.9%) |
| France (metropolitan) | 642 (4.0%) | 5161 (7.9%) | 1320 (13.5%) | 1007 (5.9%) |
| France, Guadeloupe | 0 (0.0%) | 0 (0.0%) | 0 (0.0%) | 0 (0.0%) |
| France, La R�union | 0 (0.0%) | 0 (0.0%) | 0 (0.0%) | 0 (0.0%) |
| France, Martinique | 0 (0.0%) | 0 (0.0%) | 0 (0.0%) | 0 (0.0%) |
| French Guyana | 0 (0.0%) | 0 (0.0%) | 0 (0.0%) | 0 (0.0%) |
| French Polynesia | 0 (0.0%) | 0 (0.0%) | 0 (0.0%) | 0 (0.0%) |
| Gabon | 1 (3.6%) | 20 (6.2%) | 1 (3.4%) | 2 (5.4%) |
| Gaza Strip and West Bank | 8 (4.6%) | 77 (9.3%) | 9 (8.4%) | 12 (6.4%) |
| Georgia | 6 (2.2%) | 82 (4.7%) | 10 (2.4%) | 12 (4.3%) |
| Germany | 350 (1.9%) | 2805 (3.8%) | 953 (8.1%) | 691 (3.5%) |
| Ghana | 4 (2.7%) | 252 (5.0%) | 11 (2.3%) | 6 (4.2%) |
| Greece | 122 (4.2%) | 732 (8.2%) | 181 (9.3%) | 239 (6.5%) |
| Guam | 0 (0.0%) | 0 (0.0%) | 0 (0.0%) | 0 (0.0%) |
| Guatemala | 13 (3.0%) | 137 (6.1%) | 15 (8.1%) | 16 (4.2%) |
| Guinea | 1 (2.6%) | 34 (4.7%) | 4 (6.1%) | 1 (2.4%) |
| Guinea-Bissau | 0 (0.0%) | 9 (4.8%) | 0 (0.0%) | 0 (0.0%) |
| Guyana | 1 (3.4%) | 20 (8.7%) | 1 (3.1%) | 2 (5.4%) |
| Haiti | 19 (3.6%) | 98 (7.2%) | 24 (16.6%) | 14 (4.1%) |
| Honduras | 8 (4.2%) | 104 (8.6%) | 18 (16.4%) | 10 (6.2%) |
| Hungary | 83 (3.1%) | 468 (6.1%) | 256 (14.9%) | 160 (4.7%) |
| Iceland | 3 (3.7%) | 15 (7.3%) | 8 (14.0%) | 4 (5.3%) |
| India | 609 (4.9%) | 18127 (9.4%) | 2151 (12.3%) | 1456 (6.7%) |
| Indonesia | 145 (1.9%) | 2505 (3.8%) | 370 (4.4%) | 430 (3.9%) |
| Iran, Islamic Republic of | 213 (5.5%) | 1638 (10.6%) | 355 (24.8%) | 316 (6.4%) |
| Iraq | 36 (6.3%) | 1012 (11.7%) | 53 (7.7%) | 75 (8.6%) |
| Ireland | 33 (3.9%) | 283 (7.7%) | 117 (16.7%) | 60 (5.7%) |
| Israel | 46 (3.9%) | 353 (7.6%) | 91 (10.0%) | 71 (5.9%) |
| Italy | 1004 (5.4%) | 5984 (10.4%) | 1598 (15.7%) | 1621 (8.1%) |
| Jamaica | 11 (4.8%) | 120 (9.0%) | 18 (3.6%) | 22 (6.1%) |
| Japan | 2270 (4.8%) | 8585 (9.3%) | 3825 (20.9%) | 3546 (7.2%) |
| Jordan | 14 (3.1%) | 158 (6.1%) | 12 (4.4%) | 30 (6.4%) |
| Kazakhstan | 25 (2.6%) | 238 (5.2%) | 32 (2.5%) | 48 (5.1%) |
| Kenya | 13 (1.4%) | 201 (2.8%) | 13 (1.6%) | 19 (2.1%) |
| Korea, Democratic People Republic of | 52 (3.0%) | 358 (6.0%) | 416 (47.8%) | 77 (4.6%) |
| Korea, Republic of | 429 (5.5%) | 2596 (10.5%) | 1065 (32.1%) | 807 (8.2%) |
| Kuwait | 9 (7.4%) | 122 (13.7%) | 7 (5.7%) | 22 (12.8%) |
| Kyrgyzstan | 3 (2.8%) | 41 (4.8%) | 9 (3.9%) | 3 (3.1%) |
| Lao People's Democratic Republic | 5 (2.4%) | 52 (5.0%) | 13 (13.0%) | 5 (2.2%) |
| Latvia | 7 (2.1%) | 54 (4.3%) | 10 (2.6%) | 11 (3.8%) |
| Lebanon | 14 (5.3%) | 225 (10.4%) | 58 (19.7%) | 48 (10.4%) |
| Lesotho | 0 (0.0%) | 4 (2.1%) | 1 (4.5%) | 1 (3.1%) |
| Liberia | 1 (2.7%) | 35 (5.6%) | 1 (2.1%) | 2 (4.2%) |
| Libya | 19 (5.4%) | 122 (10.4%) | 10 (18.2%) | 21 (7.5%) |
| Lithuania | 12 (2.5%) | 90 (5.2%) | 20 (2.9%) | 21 (4.8%) |
| Luxembourg | 2 (2.0%) | 27 (4.8%) | 7 (15.2%) | 5 (4.1%) |
| Madagascar | 3 (1.6%) | 106 (3.7%) | 5 (3.2%) | 4 (2.5%) |
| Malawi | 1 (1.2%) | 28 (1.8%) | 1 (1.9%) | 1 (0.9%) |
| Malaysia | 101 (5.2%) | 839 (10.0%) | 131 (8.7%) | 164 (7.9%) |
| Maldives | 0 (0.0%) | 5 (5.9%) | 1 (10.0%) | 1 (5.9%) |
| Mali | 10 (4.3%) | 193 (8.5%) | 9 (6.0%) | 11 (6.2%) |
| Malta | 6 (5.8%) | 44 (11.4%) | 7 (7.6%) | 10 (9.7%) |
| Mauritania | 3 (6.7%) | 75 (12.5%) | 2 (5.1%) | 4 (8.3%) |
| Mauritius | 5 (4.0%) | 39 (7.3%) | 5 (3.5%) | 8 (6.0%) |
| Mexico | 192 (3.2%) | 1953 (6.3%) | 201 (3.8%) | 318 (5.2%) |
| Moldova | 7 (1.5%) | 50 (3.1%) | 9 (1.7%) | 19 (3.0%) |
| Mongolia | 2 (2.6%) | 9 (4.0%) | 4 (12.9%) | 3 (3.8%) |
| Montenegro | 2 (2.9%) | 22 (5.3%) | 6 (6.3%) | 4 (4.3%) |
| Morocco | 48 (3.3%) | 829 (6.5%) | 61 (6.6%) | 56 (3.9%) |
| Mozambique | 2 (1.0%) | 45 (2.2%) | 2 (1.3%) | 1 (1.6%) |
| Myanmar | 39 (2.8%) | 424 (5.6%) | 215 (23.8%) | 58 (4.2%) |
| Namibia | 2 (5.0%) | 45 (8.1%) | 3 (5.7%) | 2 (4.7%) |
| Nepal | 2 (0.9%) | 49 (2.2%) | 20 (10.0%) | 10 (2.2%) |
| New Caledonia | 0 (0.0%) | 0 (0.0%) | 0 (0.0%) | 0 (0.0%) |
| New Zealand | 33 (2.6%) | 202 (5.2%) | 60 (11.2%) | 57 (4.0%) |
| Nicaragua | 11 (4.7%) | 109 (9.0%) | 13 (6.0%) | 14 (6.6%) |
| Niger | 5 (2.7%) | 110 (5.1%) | 0 (0.0%) | 7 (3.4%) |
| Nigeria | 43 (2.5%) | 1646 (5.1%) | 44 (2.7%) | 77 (3.9%) |
| North Macedonia | 7 (3.7%) | 75 (6.8%) | 19 (6.4%) | 11 (4.0%) |
| Norway | 91 (4.3%) | 374 (8.3%) | 151 (18.2%) | 125 (6.9%) |
| Oman | 3 (5.0%) | 54 (9.8%) | 3 (6.8%) | 14 (7.1%) |
| Pakistan | 119 (5.3%) | 3200 (10.4%) | 197 (6.5%) | 172 (5.6%) |
| Panama | 21 (6.3%) | 131 (12.0%) | 16 (4.5%) | 23 (8.6%) |
| Papua New Guinea | 2 (2.1%) | 71 (4.3%) | 10 (3.0%) | 5 (2.7%) |
| Paraguay | 21 (3.9%) | 154 (7.4%) | 13 (4.2%) | 37 (5.8%) |
| Peru | 81 (3.9%) | 584 (7.5%) | 111 (8.4%) | 98 (5.9%) |
| Philippines | 258 (4.1%) | 2607 (7.9%) | 563 (10.5%) | 358 (5.1%) |
| Poland | 264 (3.8%) | 1790 (7.3%) | 819 (10.4%) | 512 (6.1%) |
| Portugal | 180 (6.0%) | 1024 (11.4%) | 217 (15.5%) | 351 (9.2%) |
| Puerto Rico | 31 (4.9%) | 175 (9.4%) | 27 (6.0%) | 50 (7.3%) |
| Qatar | 3 (6.4%) | 32 (12.9%) | 2 (11.1%) | 7 (9.7%) |
| Romania | 114 (3.4%) | 845 (6.7%) | 214 (9.4%) | 254 (5.7%) |
| Russian Federation | 517 (1.7%) | 2712 (3.4%) | 490 (1.6%) | 751 (3.2%) |
| Rwanda | 1 (1.4%) | 29 (3.6%) | 2 (4.0%) | 2 (2.3%) |
| Saint Lucia | 0 (0.0%) | 4 (6.1%) | 0 (0.0%) | 1 (7.1%) |
| Samoa | 0 (0.0%) | 5 (6.7%) | 1 (4.5%) | 1 (7.1%) |
| Sao Tome and Principe | 0 (0.0%) | 1 (6.3%) | 0 (0.0%) | 0 (0.0%) |
| Saudi Arabia | 48 (7.2%) | 517 (13.7%) | 38 (4.1%) | 138 (10.3%) |
| Senegal | 4 (2.6%) | 102 (5.6%) | 5 (3.9%) | 4 (2.9%) |
| Serbia | 69 (6.0%) | 561 (11.5%) | 253 (21.4%) | 141 (8.7%) |
| Sierra Leone | 0 (0.0%) | 9 (4.4%) | 0 (0.0%) | 0 (0.0%) |
| Singapore | 30 (2.7%) | 193 (5.4%) | 52 (6.1%) | 71 (5.2%) |
| Slovakia | 33 (3.0%) | 220 (6.0%) | 48 (4.1%) | 70 (5.2%) |
| Slovenia | 10 (2.5%) | 81 (4.9%) | 34 (8.6%) | 21 (3.8%) |
| Solomon Islands | 0 (0.0%) | 9 (7.0%) | 0 (0.0%) | 0 (0.0%) |
| Somalia | 6 (2.9%) | 99 (5.5%) | 7 (4.9%) | 7 (3.3%) |
| South Africa | 100 (5.9%) | 1651 (11.2%) | 381 (20.7%) | 179 (9.4%) |
| South Sudan | 2 (2.1%) | 50 (4.7%) | 3 (3.6%) | 3 (3.0%) |
| Spain | 430 (4.0%) | 2688 (7.7%) | 649 (9.7%) | 934 (6.1%) |
| Sri Lanka | 24 (3.9%) | 349 (7.7%) | 43 (5.7%) | 23 (4.8%) |
| Sudan | 10 (2.7%) | 358 (5.4%) | 14 (3.9%) | 17 (3.7%) |
| Suriname | 3 (5.6%) | 17 (10.8%) | 4 (28.6%) | 4 (8.5%) |
| Sweden | 54 (2.1%) | 305 (4.1%) | 101 (6.7%) | 89 (3.6%) |
| Switzerland | 47 (2.9%) | 380 (5.7%) | 128 (11.7%) | 84 (4.7%) |
| Syrian Arab Republic | 27 (4.5%) | 361 (8.8%) | 57 (8.1%) | 34 (6.6%) |
| Tajikistan | 3 (5.0%) | 71 (8.7%) | 11 (4.7%) | 5 (4.8%) |
| Tanzania, United Republic of | 3 (0.8%) | 82 (1.8%) | 7 (1.9%) | 8 (1.6%) |
| Thailand | 143 (2.7%) | 1172 (5.4%) | 450 (10.6%) | 260 (4.7%) |
| The Netherlands | 96 (1.8%) | 562 (3.5%) | 247 (11.2%) | 186 (2.9%) |
| The Republic of the Gambia | 0 (0.0%) | 6 (5.9%) | 0 (0.0%) | 0 (0.0%) |
| Timor-Leste | 1 (4.0%) | 8 (6.1%) | 2 (18.2%) | 1 (4.3%) |
| Togo | 1 (1.2%) | 36 (3.7%) | 1 (0.8%) | 4 (2.9%) |
| Trinidad and Tobago | 7 (5.6%) | 62 (10.9%) | 7 (3.2%) | 10 (7.2%) |
| Tunisia | 19 (3.7%) | 209 (7.4%) | 27 (8.4%) | 27 (5.4%) |
| Turkmenistan | 1 (1.8%) | 37 (3.7%) | 5 (3.0%) | 2 (3.5%) |
| T�rkiye | 398 (5.9%) | 2856 (11.3%) | 904 (11.5%) | 495 (7.1%) |
| Uganda | 3 (1.0%) | 59 (2.0%) | 5 (1.3%) | 6 (1.4%) |
| Ukraine | 83 (1.4%) | 507 (2.8%) | 91 (1.1%) | 139 (2.6%) |
| United Arab Emirates | 10 (7.4%) | 161 (14.1%) | 9 (5.9%) | 25 (11.6%) |
| United Kingdom | 518 (3.5%) | 4001 (6.8%) | 1701 (16.3%) | 906 (5.6%) |
| United States of America | 2265 (4.4%) | 23432 (8.5%) | 9710 (14.7%) | 3188 (5.9%) |
| Uruguay | 31 (4.0%) | 171 (7.8%) | 42 (15.4%) | 42 (6.2%) |
| Uzbekistan | 17 (2.6%) | 252 (5.0%) | 34 (3.8%) | 21 (3.7%) |
| Vanuatu | 0 (0.0%) | 1 (2.7%) | 0 (0.0%) | 0 (0.0%) |
| Venezuela | 114 (5.4%) | 867 (10.4%) | 239 (16.1%) | 174 (7.9%) |
| Viet Nam | 85 (3.0%) | 1469 (6.0%) | 444 (9.0%) | 193 (4.4%) |
| Yemen | 17 (3.4%) | 194 (6.8%) | 16 (100.0%) | 20 (4.7%) |
| Zambia | 1 (1.9%) | 50 (4.5%) | 4 (7.5%) | 3 (3.0%) |
| Zimbabwe | 6 (2.7%) | 93 (5.2%) | 9 (2.6%) | 6 (3.2%) |

## Smokeless Tobacco and Areca Nut

**Table 5.6.1.** Proportion and number of lip, oral cavity cancer cases attributable to smokeless tobacco, women and men

| **Country** | **Women** | | | **Men** | | |
| --- | --- | --- | --- | --- | --- | --- |
| **N** | **PAF smokeless** | **PAF all** | **N** | **PAF smokeless** | **PAF all** |
| Afghanistan | 119 | 37.1% | 0.9% | 566 | 82.0% | 5.2% |
| Albania | 0 | 0.6% | 0.0% | 1 | 1.2% | 0.0% |
| Algeria | 3 | 2.6% | 0.0% | 53 | 23.4% | 0.2% |
| Angola | 2 | 0.5% | 0.0% | 17 | 6.1% | 0.2% |
| Argentina | 3 | 0.6% | 0.0% | 2 | 0.3% | 0.0% |
| Armenia | 0 | 0.0% | 0.0% | 0 | 0.6% | 0.0% |
| Australia | 8 | 0.9% | 0.0% | 31 | 1.7% | 0.0% |
| Austria | 0 | 0.1% | 0.0% | 21 | 4.8% | 0.1% |
| Azerbaijan | 0 | 0.0% | 0.0% | 1 | 0.4% | 0.0% |
| Bahamas | 0 | 0.0% | 0.0% | 0 | 2.1% | 0.0% |
| Bahrain | 0 | 0.7% | 0.0% | 1 | 5.7% | 0.2% |
| Bangladesh | 3220 | 60.8% | 4.5% | 6434 | 59.7% | 6.8% |
| Barbados | 0 | 6.1% | 0.0% | 0 | 0.0% | 0.0% |
| Belarus | 0 | 0.0% | 0.0% | 4 | 0.5% | 0.0% |
| Belgium | 0 | 0.0% | 0.0% | 21 | 2.9% | 0.1% |
| Belize | 0 | 0.0% | 0.0% | 0 | 0.0% | 0.0% |
| Benin | 5 | 11.6% | 0.1% | 8 | 23.3% | 0.2% |
| Bhutan | 2 | 36.8% | 0.7% | 9 | 50.5% | 2.5% |
| Bolivia | 0 | 0.9% | 0.0% | 0 | 0.9% | 0.0% |
| Bosnia Herzegovina | 1 | 1.8% | 0.0% | 3 | 2.4% | 0.0% |
| Botswana | 3 | 24.2% | 0.2% | 4 | 7.2% | 0.5% |
| Brazil | 62 | 2.3% | 0.0% | 229 | 2.8% | 0.1% |
| Brunei Darussalam | 1 | 31.4% | 0.1% | 0 | 0.0% | 0.0% |
| Bulgaria | 0 | 0.0% | 0.0% | 0 | 0.0% | 0.0% |
| Burkina Faso | 29 | 35.5% | 0.3% | 16 | 11.6% | 0.3% |
| Burundi | 2 | 6.6% | 0.0% | 0 | 0.3% | 0.0% |
| Cambodia | 129 | 47.8% | 1.2% | 14 | 5.4% | 0.2% |
| Cameroon | 3 | 4.0% | 0.0% | 17 | 11.5% | 0.2% |
| Canada | 0 | 0.0% | 0.0% | 47 | 2.1% | 0.0% |
| Cape Verde | 1 | 23.4% | 0.6% | 2 | 16.3% | 1.0% |
| Central African Republic | 4 | 20.7% | 0.2% | 6 | 28.7% | 0.5% |
| Chad | 1 | 0.8% | 0.0% | 1 | 3.7% | 0.0% |
| Chile | 1 | 0.7% | 0.0% | 1 | 0.6% | 0.0% |
| China | 57 | 0.4% | 0.0% | 3098 | 12.8% | 0.1% |
| Colombia | 41 | 8.3% | 0.1% | 33 | 8.3% | 0.1% |
| Comoros | 0 | 0.0% | 0.0% | 4 | 59.0% | 1.8% |
| Congo, Democratic Republic of | 52 | 24.0% | 0.2% | 96 | 31.0% | 0.4% |
| Congo, Republic of | 0 | 4.3% | 0.0% | 2 | 19.6% | 0.2% |
| Costa Rica | 0 | 0.2% | 0.0% | 1 | 2.3% | 0.0% |
| Croatia | 1 | 1.6% | 0.0% | 5 | 2.3% | 0.0% |
| Cuba | 1 | 0.3% | 0.0% | 146 | 18.5% | 0.6% |
| Cyprus | 0 | 0.0% | 0.0% | 2 | 5.6% | 0.1% |
| Czechia | 11 | 3.2% | 0.0% | 38 | 6.4% | 0.1% |
| C�te d'Ivoire | 4 | 3.6% | 0.0% | 2 | 1.6% | 0.0% |
| Denmark | 2 | 1.2% | 0.0% | 8 | 2.9% | 0.0% |
| Djibouti | 0 | 1.4% | 0.0% | 1 | 19.4% | 0.4% |
| Dominican Republic | 1 | 0.8% | 0.0% | 5 | 5.2% | 0.0% |
| Ecuador | 0 | 0.0% | 0.0% | 0 | 0.0% | 0.0% |
| Egypt | 0 | 0.0% | 0.0% | 11 | 1.6% | 0.0% |
| El Salvador | 0 | 0.5% | 0.0% | 0 | 0.6% | 0.0% |
| Equatorial Guinea | 0 | 4.5% | 0.0% | 1 | 7.5% | 0.2% |
| Eritrea | 0 | 0.3% | 0.0% | 5 | 24.5% | 0.6% |
| Estonia | 0 | 1.2% | 0.0% | 4 | 6.5% | 0.1% |
| Eswatini | 0 | 11.0% | 0.0% | 1 | 14.1% | 0.2% |
| Ethiopia | 11 | 2.0% | 0.0% | 22 | 4.5% | 0.1% |
| Fiji | 0 | 0.6% | 0.0% | 2 | 17.5% | 0.4% |
| Finland | 1 | 0.4% | 0.0% | 18 | 6.1% | 0.1% |
| France (metropolitan) | 104 | 4.2% | 0.1% | 187 | 4.0% | 0.1% |
| France, Guadeloupe | 0 | 0.6% | 0.0% | 0 | 2.1% | 0.0% |
| France, La R�union | 5 | 39.1% | 0.4% | 35 | 61.4% | 2.0% |
| France, Martinique | 0 | 1.1% | 0.0% | 0 | 1.9% | 0.0% |
| French Guyana | 0 | 0.0% | 0.0% | 0 | 1.7% | 0.0% |
| French Polynesia | 0 | 3.3% | 0.0% | 1 | 5.8% | 0.1% |
| Gabon | 1 | 4.6% | 0.1% | 1 | 3.4% | 0.2% |
| Gaza Strip and West Bank | 0 | 1.4% | 0.0% | 1 | 3.0% | 0.0% |
| Georgia | 0 | 0.4% | 0.0% | 5 | 3.0% | 0.1% |
| Germany | 18 | 0.9% | 0.0% | 329 | 9.3% | 0.1% |
| Ghana | 1 | 1.0% | 0.0% | 11 | 6.6% | 0.1% |
| Greece | 2 | 0.6% | 0.0% | 2 | 0.6% | 0.0% |
| Guam | 0 | 27.8% | 0.1% | 1 | 22.0% | 0.4% |
| Guatemala | 0 | 0.5% | 0.0% | 0 | 0.8% | 0.0% |
| Guinea | 1 | 3.8% | 0.0% | 2 | 3.7% | 0.1% |
| Guinea-Bissau | 0 | 3.4% | 0.0% | 0 | 2.4% | 0.0% |
| Guyana | 0 | 11.7% | 0.0% | 1 | 11.7% | 0.2% |
| Haiti | 3 | 8.3% | 0.0% | 7 | 6.9% | 0.1% |
| Honduras | 0 | 0.4% | 0.0% | 1 | 0.9% | 0.0% |
| Hungary | 1 | 0.3% | 0.0% | 2 | 0.2% | 0.0% |
| Iceland | 0 | 0.0% | 0.0% | 1 | 5.7% | 0.1% |
| India | 18506 | 51.5% | 2.6% | 64860 | 60.2% | 9.5% |
| Indonesia | 419 | 16.7% | 0.2% | 570 | 14.2% | 0.3% |
| Iran, Islamic Republic of | 8 | 1.5% | 0.0% | 96 | 12.9% | 0.1% |
| Iraq | 0 | 0.1% | 0.0% | 1 | 0.4% | 0.0% |
| Ireland | 2 | 2.6% | 0.0% | 11 | 4.5% | 0.1% |
| Israel | 2 | 1.4% | 0.0% | 3 | 2.9% | 0.0% |
| Italy | 29 | 1.4% | 0.0% | 66 | 2.3% | 0.0% |
| Jamaica | 1 | 4.5% | 0.0% | 2 | 12.3% | 0.1% |
| Japan | 65 | 1.4% | 0.0% | 94 | 1.4% | 0.0% |
| Jordan | 0 | 0.0% | 0.0% | 1 | 1.2% | 0.0% |
| Kazakhstan | 61 | 36.3% | 0.3% | 285 | 65.5% | 1.8% |
| Kenya | 67 | 17.4% | 0.2% | 66 | 18.1% | 0.4% |
| Korea, Democratic People Republic of | 0 | 0.0% | 0.0% | 0 | 0.0% | 0.0% |
| Korea, Republic of | 8 | 1.4% | 0.0% | 16 | 1.4% | 0.0% |
| Kuwait | 0 | 0.0% | 0.0% | 1 | 1.4% | 0.0% |
| Kyrgyzstan | 1 | 2.6% | 0.0% | 30 | 43.1% | 0.9% |
| Lao People's Democratic Republic | 38 | 38.7% | 0.8% | 0 | 0.0% | 0.0% |
| Latvia | 0 | 0.0% | 0.0% | 0 | 0.2% | 0.0% |
| Lebanon | 2 | 5.6% | 0.0% | 5 | 8.4% | 0.1% |
| Lesotho | 4 | 40.8% | 0.3% | 3 | 16.9% | 0.5% |
| Liberia | 2 | 12.4% | 0.1% | 1 | 2.9% | 0.0% |
| Libya | 0 | 0.7% | 0.0% | 2 | 5.1% | 0.0% |
| Lithuania | 0 | 0.6% | 0.0% | 6 | 3.1% | 0.1% |
| Luxembourg | 0 | 3.4% | 0.0% | 0 | 4.5% | 0.0% |
| Madagascar | 26 | 29.8% | 0.2% | 164 | 55.8% | 2.0% |
| Malawi | 10 | 11.7% | 0.1% | 6 | 6.2% | 0.1% |
| Malaysia | 10 | 2.5% | 0.0% | 16 | 3.7% | 0.1% |
| Maldives | 0 | 0.0% | 0.0% | 1 | 22.4% | 0.4% |
| Mali | 1 | 0.5% | 0.0% | 3 | 3.3% | 0.1% |
| Malta | 1 | 4.5% | 0.1% | 2 | 13.5% | 0.1% |
| Mauritania | 12 | 50.2% | 0.6% | 3 | 11.4% | 0.2% |
| Mauritius | 10 | 38.7% | 0.7% | 23 | 61.6% | 1.9% |
| Mexico | 5 | 0.7% | 0.0% | 11 | 1.3% | 0.0% |
| Moldova | 0 | 0.0% | 0.0% | 1 | 0.2% | 0.0% |
| Mongolia | 0 | 0.5% | 0.0% | 1 | 4.9% | 0.0% |
| Montenegro | 0 | 0.6% | 0.0% | 0 | 1.2% | 0.0% |
| Morocco | 1 | 0.2% | 0.0% | 43 | 10.8% | 0.1% |
| Mozambique | 12 | 12.8% | 0.1% | 10 | 6.7% | 0.1% |
| Myanmar | 431 | 51.3% | 1.1% | 1167 | 70.6% | 3.3% |
| Namibia | 3 | 6.2% | 0.1% | 3 | 5.0% | 0.2% |
| Nepal | 60 | 22.9% | 0.5% | 423 | 60.8% | 4.4% |
| New Caledonia | 0 | 1.6% | 0.0% | 1 | 9.9% | 0.2% |
| New Zealand | 1 | 0.5% | 0.0% | 13 | 5.3% | 0.1% |
| Nicaragua | 0 | 0.6% | 0.0% | 0 | 2.1% | 0.0% |
| Niger | 4 | 4.5% | 0.1% | 7 | 7.9% | 0.1% |
| Nigeria | 14 | 2.3% | 0.0% | 58 | 7.2% | 0.1% |
| North Macedonia | 0 | 0.4% | 0.0% | 0 | 0.6% | 0.0% |
| Norway | 0 | 0.0% | 0.0% | 0 | 0.0% | 0.0% |
| Oman | 0 | 0.5% | 0.0% | 3 | 4.7% | 0.1% |
| Pakistan | 2014 | 38.9% | 2.1% | 6837 | 63.6% | 8.1% |
| Panama | 0 | 1.4% | 0.0% | 1 | 2.9% | 0.0% |
| Papua New Guinea | 368 | 83.8% | 5.7% | 600 | 84.1% | 11.9% |
| Paraguay | 2 | 13.2% | 0.0% | 8 | 7.9% | 0.1% |
| Peru | 11 | 2.8% | 0.0% | 10 | 3.3% | 0.0% |
| Philippines | 90 | 10.6% | 0.1% | 142 | 13.2% | 0.2% |
| Poland | 0 | 0.0% | 0.0% | 53 | 1.9% | 0.1% |
| Portugal | 0 | 0.0% | 0.0% | 0 | 0.0% | 0.0% |
| Puerto Rico | 0 | 0.9% | 0.0% | 7 | 5.3% | 0.1% |
| Qatar | 0 | 0.0% | 0.0% | 2 | 6.4% | 0.2% |
| Romania | 2 | 0.7% | 0.0% | 17 | 1.0% | 0.0% |
| Russian Federation | 17 | 0.5% | 0.0% | 118 | 1.8% | 0.0% |
| Rwanda | 4 | 14.6% | 0.1% | 1 | 1.2% | 0.0% |
| Saint Lucia | 0 | 0.0% | 0.0% | 0 | 4.3% | 0.2% |
| Samoa | 0 | 0.0% | 0.0% | 0 | 8.2% | 0.1% |
| Sao Tome and Principe | 0 | 0.0% | 0.0% | 0 | 0.0% | 0.0% |
| Saudi Arabia | 3 | 1.6% | 0.0% | 14 | 5.0% | 0.1% |
| Senegal | 3 | 2.6% | 0.0% | 1 | 0.8% | 0.0% |
| Serbia | 1 | 0.6% | 0.0% | 4 | 0.9% | 0.0% |
| Sierra Leone | 0 | 14.1% | 0.0% | 0 | 7.1% | 0.0% |
| Singapore | 2 | 2.5% | 0.0% | 6 | 3.7% | 0.0% |
| Slovakia | 3 | 2.3% | 0.0% | 26 | 5.3% | 0.2% |
| Slovenia | 1 | 2.1% | 0.0% | 4 | 3.4% | 0.0% |
| Solomon Islands | 1 | 14.7% | 0.1% | 2 | 18.9% | 0.5% |
| Somalia | 10 | 10.3% | 0.1% | 11 | 11.7% | 0.3% |
| South Africa | 85 | 14.2% | 0.2% | 33 | 3.1% | 0.1% |
| South Sudan | 0 | 0.6% | 0.0% | 18 | 28.9% | 0.7% |
| Spain | 112 | 7.8% | 0.1% | 149 | 5.8% | 0.1% |
| Sri Lanka | 158 | 27.9% | 0.9% | 1144 | 57.5% | 7.4% |
| Sudan | 1 | 0.6% | 0.0% | 103 | 30.6% | 0.9% |
| Suriname | 0 | 7.6% | 0.1% | 1 | 7.5% | 0.1% |
| Sweden | 0 | 0.0% | 0.0% | 0 | 0.0% | 0.0% |
| Switzerland | 7 | 3.4% | 0.0% | 65 | 12.8% | 0.2% |
| Syrian Arab Republic | 0 | 0.0% | 0.0% | 0 | 0.0% | 0.0% |
| Tajikistan | 1 | 1.9% | 0.0% | 32 | 75.1% | 1.1% |
| Tanzania, United Republic of | 30 | 13.7% | 0.1% | 36 | 8.3% | 0.2% |
| Thailand | 615 | 29.8% | 0.7% | 171 | 7.0% | 0.2% |
| The Netherlands | 2 | 0.3% | 0.0% | 7 | 0.9% | 0.0% |
| The Republic of the Gambia | 0 | 0.0% | 0.0% | 0 | 1.9% | 0.0% |
| Timor-Leste | 4 | 71.3% | 0.9% | 3 | 63.6% | 0.7% |
| Togo | 3 | 11.5% | 0.1% | 6 | 17.5% | 0.3% |
| Trinidad and Tobago | 0 | 0.4% | 0.0% | 0 | 1.4% | 0.0% |
| Tunisia | 4 | 3.9% | 0.0% | 16 | 9.2% | 0.1% |
| Turkmenistan | 0 | 0.6% | 0.0% | 40 | 36.1% | 1.4% |
| T�rkiye | 4 | 0.5% | 0.0% | 22 | 1.5% | 0.0% |
| Uganda | 22 | 15.4% | 0.1% | 45 | 14.1% | 0.3% |
| Ukraine | 0 | 0.0% | 0.0% | 26 | 1.0% | 0.0% |
| United Arab Emirates | 0 | 1.0% | 0.0% | 3 | 4.8% | 0.1% |
| United Kingdom | 103 | 4.5% | 0.1% | 165 | 4.1% | 0.1% |
| United States of America | 68 | 0.8% | 0.0% | 2238 | 11.8% | 0.2% |
| Uruguay | 0 | 0.1% | 0.0% | 0 | 0.4% | 0.0% |
| Uzbekistan | 13 | 5.1% | 0.1% | 596 | 77.9% | 3.8% |
| Vanuatu | 0 | 0.7% | 0.0% | 0 | 9.4% | 0.2% |
| Venezuela | 8 | 3.5% | 0.0% | 61 | 14.8% | 0.2% |
| Viet Nam | 49 | 8.9% | 0.1% | 24 | 1.3% | 0.0% |
| Yemen | 37 | 21.6% | 0.4% | 47 | 40.4% | 0.7% |
| Zambia | 9 | 19.1% | 0.1% | 6 | 7.3% | 0.1% |
| Zimbabwe | 2 | 3.8% | 0.0% | 5 | 8.7% | 0.1% |
|  |  |  |  |  |  |  |

## Suboptimal breastfeeding

**Table 5.7.1.** Proportion and number of breast cancer cases attributable to suboptimal breastfeeding, women

| **Country** | **N** | **PAF suboptimal** | **PAF all** |
| --- | --- | --- | --- |
| Afghanistan | 102 | 2.9% | 0.8% |
| Albania | 62 | 6.1% | 1.9% |
| Algeria | 1037 | 7.1% | 3.0% |
| Angola | 105 | 3.6% | 0.8% |
| Argentina | 1449 | 6.7% | 2.2% |
| Armenia | 79 | 7.8% | 1.8% |
| Australia | 1053 | 4.8% | 1.5% |
| Austria | 0 | 0.0% | 0.0% |
| Azerbaijan | 178 | 8.1% | 2.1% |
| Bahamas | 0 | 0.0% | 0.0% |
| Bahrain | 0 | 0.0% | 0.0% |
| Bangladesh | 114 | 0.9% | 0.2% |
| Barbados | 5 | 3.4% | 0.9% |
| Belarus | 471 | 9.1% | 2.3% |
| Belgium | 0 | 0.0% | 0.0% |
| Belize | 5 | 5.9% | 2.4% |
| Benin | 47 | 3.5% | 1.2% |
| Bhutan | 0 | 0.0% | 0.0% |
| Bolivia | 71 | 4.2% | 0.7% |
| Bosnia Herzegovina | 149 | 9.7% | 2.4% |
| Botswana | 24 | 9.3% | 1.8% |
| Brazil | 5873 | 6.2% | 2.0% |
| Brunei Darussalam | 0 | 0.0% | 0.0% |
| Bulgaria | 0 | 0.0% | 0.0% |
| Burkina Faso | 14 | 1.0% | 0.2% |
| Burundi | 11 | 1.3% | 0.2% |
| Cambodia | 97 | 4.6% | 0.9% |
| Cameroon | 218 | 5.2% | 1.9% |
| Canada | 0 | 0.0% | 0.0% |
| Cape Verde | 4 | 6.0% | 1.9% |
| Central African Republic | 21 | 3.7% | 1.3% |
| Chad | 19 | 2.5% | 0.4% |
| Chile | 0 | 0.0% | 0.0% |
| China | 30537 | 8.6% | 1.3% |
| Colombia | 1033 | 6.1% | 1.7% |
| Comoros | 2 | 3.1% | 0.5% |
| Congo, Democratic Republic of | 146 | 2.0% | 0.5% |
| Congo, Republic of | 33 | 6.2% | 2.1% |
| Costa Rica | 89 | 6.6% | 1.5% |
| Croatia | 0 | 0.0% | 0.0% |
| Cuba | 445 | 8.6% | 2.1% |
| Cyprus | 0 | 0.0% | 0.0% |
| Czechia | 0 | 0.0% | 0.0% |
| C�te d'Ivoire | 149 | 3.8% | 1.3% |
| Denmark | 0 | 0.0% | 0.0% |
| Djibouti | 0 | 0.0% | 0.0% |
| Dominican Republic | 286 | 8.8% | 3.1% |
| Ecuador | 202 | 5.2% | 1.2% |
| Egypt | 1463 | 5.4% | 1.9% |
| El Salvador | 59 | 3.7% | 1.1% |
| Equatorial Guinea | 13 | 7.5% | 2.6% |
| Eritrea | 8 | 1.6% | 0.5% |
| Estonia | 0 | 0.0% | 0.0% |
| Eswatini | 8 | 7.5% | 1.1% |
| Ethiopia | 188 | 1.1% | 0.4% |
| Fiji | 17 | 5.9% | 1.8% |
| Finland | 0 | 0.0% | 0.0% |
| France (metropolitan) | 0 | 0.0% | 0.0% |
| France, Guadeloupe | 0 | 0.0% | 0.0% |
| France, La R�union | 0 | 0.0% | 0.0% |
| France, Martinique | 0 | 0.0% | 0.0% |
| French Guyana | 0 | 0.0% | 0.0% |
| French Polynesia | 0 | 0.0% | 0.0% |
| Gabon | 27 | 8.4% | 2.4% |
| Gaza Strip and West Bank | 63 | 7.6% | 2.5% |
| Georgia | 142 | 8.2% | 2.3% |
| Germany | 0 | 0.0% | 0.0% |
| Ghana | 172 | 3.4% | 1.1% |
| Greece | 0 | 0.0% | 0.0% |
| Guam | 0 | 0.0% | 0.0% |
| Guatemala | 69 | 3.1% | 0.7% |
| Guinea | 11 | 1.5% | 0.2% |
| Guinea-Bissau | 5 | 2.7% | 0.7% |
| Guyana | 7 | 3.1% | 1.0% |
| Haiti | 62 | 4.6% | 0.9% |
| Honduras | 55 | 4.5% | 1.0% |
| Hungary | 0 | 0.0% | 0.0% |
| Iceland | 0 | 0.0% | 0.0% |
| India | 4301 | 2.2% | 0.6% |
| Indonesia | 2386 | 3.6% | 1.1% |
| Iran, Islamic Republic of | 0 | 0.0% | 0.0% |
| Iraq | 593 | 6.9% | 2.8% |
| Ireland | 0 | 0.0% | 0.0% |
| Israel | 0 | 0.0% | 0.0% |
| Italy | 0 | 0.0% | 0.0% |
| Jamaica | 91 | 6.9% | 2.4% |
| Japan | 0 | 0.0% | 0.0% |
| Jordan | 207 | 8.0% | 3.2% |
| Kazakhstan | 324 | 7.1% | 1.8% |
| Kenya | 196 | 2.7% | 0.7% |
| Korea, Democratic People Republic of | 0 | 0.0% | 0.0% |
| Korea, Republic of | 0 | 0.0% | 0.0% |
| Kuwait | 0 | 0.0% | 0.0% |
| Kyrgyzstan | 41 | 4.8% | 1.1% |
| Lao People's Democratic Republic | 49 | 4.7% | 1.1% |
| Latvia | 0 | 0.0% | 0.0% |
| Lebanon | 186 | 8.6% | 2.9% |
| Lesotho | 10 | 5.4% | 0.8% |
| Liberia | 21 | 3.4% | 0.9% |
| Libya | 0 | 0.0% | 0.0% |
| Lithuania | 0 | 0.0% | 0.0% |
| Luxembourg | 0 | 0.0% | 0.0% |
| Madagascar | 65 | 2.3% | 0.5% |
| Malawi | 18 | 1.2% | 0.1% |
| Malaysia | 0 | 0.0% | 0.0% |
| Maldives | 3 | 3.5% | 1.3% |
| Mali | 71 | 3.1% | 0.8% |
| Malta | 0 | 0.0% | 0.0% |
| Mauritania | 22 | 3.7% | 1.1% |
| Mauritius | 0 | 0.0% | 0.0% |
| Mexico | 2182 | 7.0% | 2.0% |
| Moldova | 130 | 8.0% | 2.1% |
| Mongolia | 8 | 3.5% | 0.3% |
| Montenegro | 39 | 9.4% | 3.2% |
| Morocco | 911 | 7.1% | 2.8% |
| Mozambique | 55 | 2.7% | 0.3% |
| Myanmar | 181 | 2.4% | 0.4% |
| Namibia | 32 | 5.8% | 1.8% |
| Nepal | 16 | 0.7% | 0.1% |
| New Caledonia | 0 | 0.0% | 0.0% |
| New Zealand | 0 | 0.0% | 0.0% |
| Nicaragua | 63 | 5.2% | 1.4% |
| Niger | 51 | 2.4% | 0.8% |
| Nigeria | 1291 | 4.0% | 1.7% |
| North Macedonia | 87 | 7.9% | 2.7% |
| Norway | 0 | 0.0% | 0.0% |
| Oman | 0 | 0.0% | 0.0% |
| Pakistan | 1009 | 3.3% | 1.0% |
| Panama | 38 | 3.5% | 0.9% |
| Papua New Guinea | 39 | 2.3% | 0.6% |
| Paraguay | 153 | 7.4% | 2.3% |
| Peru | 293 | 3.8% | 0.8% |
| Philippines | 1786 | 5.4% | 1.7% |
| Poland | 0 | 0.0% | 0.0% |
| Portugal | 0 | 0.0% | 0.0% |
| Puerto Rico | 0 | 0.0% | 0.0% |
| Qatar | 8 | 3.2% | 1.3% |
| Romania | 0 | 0.0% | 0.0% |
| Russian Federation | 0 | 0.0% | 0.0% |
| Rwanda | 9 | 1.1% | 0.2% |
| Saint Lucia | 5 | 7.6% | 2.7% |
| Samoa | 2 | 2.7% | 1.0% |
| Sao Tome and Principe | 1 | 6.3% | 1.5% |
| Saudi Arabia | 0 | 0.0% | 0.0% |
| Senegal | 39 | 2.1% | 0.5% |
| Serbia | 453 | 9.2% | 2.4% |
| Sierra Leone | 6 | 2.9% | 0.6% |
| Singapore | 0 | 0.0% | 0.0% |
| Slovakia | 0 | 0.0% | 0.0% |
| Slovenia | 0 | 0.0% | 0.0% |
| Solomon Islands | 4 | 3.1% | 1.0% |
| Somalia | 110 | 6.1% | 1.7% |
| South Africa | 1074 | 7.3% | 2.0% |
| South Sudan | 45 | 4.2% | 1.1% |
| Spain | 0 | 0.0% | 0.0% |
| Sri Lanka | 53 | 1.2% | 0.3% |
| Sudan | 201 | 3.0% | 1.2% |
| Suriname | 14 | 8.9% | 2.6% |
| Sweden | 0 | 0.0% | 0.0% |
| Switzerland | 0 | 0.0% | 0.0% |
| Syrian Arab Republic | 250 | 6.1% | 2.2% |
| Tajikistan | 32 | 3.9% | 0.9% |
| Tanzania, United Republic of | 116 | 2.6% | 0.4% |
| Thailand | 1763 | 8.2% | 1.9% |
| The Netherlands | 0 | 0.0% | 0.0% |
| The Republic of the Gambia | 2 | 2.0% | 0.3% |
| Timor-Leste | 6 | 4.6% | 1.3% |
| Togo | 19 | 2.0% | 0.6% |
| Trinidad and Tobago | 23 | 4.0% | 1.2% |
| Tunisia | 205 | 7.3% | 2.3% |
| Turkmenistan | 62 | 6.2% | 1.7% |
| T�rkiye | 1379 | 5.5% | 1.3% |
| Uganda | 102 | 3.4% | 0.5% |
| Ukraine | 1375 | 7.6% | 1.8% |
| United Arab Emirates | 0 | 0.0% | 0.0% |
| United Kingdom | 0 | 0.0% | 0.0% |
| United States of America | 15063 | 5.5% | 1.7% |
| Uruguay | 72 | 3.3% | 0.9% |
| Uzbekistan | 236 | 4.7% | 1.2% |
| Vanuatu | 2 | 5.4% | 1.4% |
| Venezuela | 0 | 0.0% | 0.0% |
| Viet Nam | 1540 | 6.3% | 1.8% |
| Yemen | 118 | 4.1% | 1.3% |
| Zambia | 35 | 3.2% | 0.4% |
| Zimbabwe | 98 | 5.4% | 0.9% |

## Air pollution

**Table 5.8.1.** Proportion and number of trachea, bronchus and lung cancer cases attributable to air pollution, women and men

| **Country** | **Women** | | | **Men** | | |
| --- | --- | --- | --- | --- | --- | --- |
| **N** | **PAF air pollution** | **PAF all** | **N** | **PAF air pollution** | **PAF all** |
| Afghanistan | 148 | 39.6% | 1.2% | 402 | 39.4% | 3.7% |
| Albania | 29 | 9.5% | 0.9% | 109 | 9.6% | 2.5% |
| Algeria | 76 | 10.4% | 0.2% | 449 | 10.4% | 1.6% |
| Angola | 13 | 11.3% | 0.1% | 25 | 11.2% | 0.2% |
| Argentina | 111 | 2.5% | 0.2% | 216 | 2.5% | 0.3% |
| Armenia | 75 | 26.5% | 1.7% | 305 | 26.6% | 6.1% |
| Australia | 0 | 0.0% | 0.0% | 0 | 0.0% | 0.0% |
| Austria | 87 | 3.6% | 0.4% | 108 | 3.6% | 0.4% |
| Azerbaijan | 64 | 18.5% | 0.8% | 369 | 18.4% | 3.8% |
| Bahamas | 0 | 0.0% | 0.0% | 0 | 0.0% | 0.0% |
| Bahrain | 8 | 32.0% | 1.1% | 20 | 31.3% | 3.1% |
| Bangladesh | 880 | 29.7% | 1.2% | 2975 | 29.6% | 3.2% |
| Barbados | 0 | 0.0% | 0.0% | 0 | 0.0% | 0.0% |
| Belarus | 36 | 6.1% | 0.2% | 246 | 6.1% | 1.0% |
| Belgium | 124 | 3.9% | 0.4% | 214 | 3.9% | 0.6% |
| Belize | 0 | 0.0% | 0.0% | 0 | 0.0% | 0.0% |
| Benin | 8 | 18.2% | 0.2% | 10 | 16.7% | 0.3% |
| Bhutan | 4 | 16.0% | 1.4% | 4 | 15.4% | 1.1% |
| Bolivia | 52 | 13.2% | 0.5% | 101 | 13.1% | 1.4% |
| Bosnia Herzegovina | 107 | 18.6% | 1.7% | 349 | 18.7% | 4.6% |
| Botswana | 0 | 0.0% | 0.0% | 1 | 2.2% | 0.1% |
| Brazil | 679 | 3.5% | 0.2% | 868 | 3.5% | 0.3% |
| Brunei Darussalam | 0 | 0.0% | 0.0% | 0 | 0.0% | 0.0% |
| Bulgaria | 105 | 10.0% | 0.7% | 291 | 10.0% | 1.7% |
| Burkina Faso | 59 | 23.4% | 0.7% | 23 | 23.2% | 0.4% |
| Burundi | 12 | 14.1% | 0.3% | 14 | 14.4% | 0.4% |
| Cambodia | 54 | 6.9% | 0.5% | 94 | 6.8% | 1.0% |
| Cameroon | 43 | 32.1% | 0.4% | 84 | 32.4% | 1.1% |
| Canada | 0 | 0.0% | 0.0% | 0 | 0.0% | 0.0% |
| Cape Verde | 1 | 16.7% | 0.5% | 1 | 33.3% | 0.5% |
| Central African Republic | 3 | 16.7% | 0.2% | 4 | 14.3% | 0.4% |
| Chad | 6 | 24.0% | 0.1% | 33 | 24.6% | 0.6% |
| Chile | 174 | 9.8% | 0.7% | 258 | 9.8% | 0.8% |
| China | 125461 | 31.2% | 5.5% | 205653 | 31.2% | 8.2% |
| Colombia | 181 | 6.0% | 0.3% | 251 | 6.0% | 0.5% |
| Comoros | 0 | 0.0% | 0.0% | 0 | 0.0% | 0.0% |
| Congo, Democratic Republic of | 70 | 17.3% | 0.2% | 103 | 17.3% | 0.5% |
| Congo, Republic of | 2 | 15.4% | 0.1% | 4 | 14.8% | 0.3% |
| Costa Rica | 12 | 7.2% | 0.2% | 25 | 6.9% | 0.4% |
| Croatia | 95 | 8.2% | 0.8% | 204 | 8.2% | 1.4% |
| Cuba | 92 | 3.2% | 0.4% | 139 | 3.1% | 0.6% |
| Cyprus | 9 | 5.3% | 0.3% | 24 | 5.3% | 0.8% |
| Czechia | 181 | 7.3% | 0.6% | 271 | 7.3% | 0.8% |
| C�te d'Ivoire | 22 | 23.2% | 0.2% | 57 | 23.5% | 0.6% |
| Denmark | 32 | 1.3% | 0.2% | 30 | 1.3% | 0.1% |
| Djibouti | 1 | 10.0% | 0.2% | 1 | 6.3% | 0.3% |
| Dominican Republic | 0 | 0.0% | 0.0% | 0 | 0.0% | 0.0% |
| Ecuador | 44 | 6.4% | 0.3% | 43 | 6.5% | 0.3% |
| Egypt | 721 | 35.3% | 0.9% | 1976 | 35.3% | 2.7% |
| El Salvador | 28 | 13.7% | 0.5% | 25 | 13.7% | 0.6% |
| Equatorial Guinea | 1 | 11.1% | 0.2% | 1 | 9.1% | 0.2% |
| Eritrea | 4 | 11.8% | 0.3% | 4 | 10.5% | 0.5% |
| Estonia | 0 | 0.0% | 0.0% | 0 | 0.0% | 0.0% |
| Eswatini | 0 | 0.0% | 0.0% | 1 | 5.3% | 0.3% |
| Ethiopia | 125 | 9.9% | 0.2% | 121 | 9.9% | 0.5% |
| Fiji | 0 | 0.0% | 0.0% | 0 | 0.0% | 0.0% |
| Finland | 0 | 0.0% | 0.0% | 0 | 0.0% | 0.0% |
| France (metropolitan) | 470 | 2.8% | 0.2% | 915 | 2.8% | 0.4% |
| France, Guadeloupe | 0 | 0.0% | 0.0% | 0 | 0.0% | 0.0% |
| France, La R�union | 0 | 0.0% | 0.0% | 0 | 0.0% | 0.0% |
| France, Martinique | 0 | 0.0% | 0.0% | 0 | 0.0% | 0.0% |
| French Guyana | 0 | 0.0% | 0.0% | 0 | 0.0% | 0.0% |
| French Polynesia | 0 | 0.0% | 0.0% | 0 | 0.0% | 0.0% |
| Gabon | 3 | 15.0% | 0.3% | 3 | 12.0% | 0.4% |
| Gaza Strip and West Bank | 16 | 15.8% | 0.6% | 75 | 15.5% | 3.0% |
| Georgia | 26 | 12.4% | 0.4% | 171 | 12.5% | 2.4% |
| Germany | 802 | 3.2% | 0.3% | 1176 | 3.2% | 0.4% |
| Ghana | 59 | 26.8% | 0.4% | 80 | 26.8% | 0.7% |
| Greece | 143 | 6.4% | 0.5% | 408 | 6.4% | 1.2% |
| Guam | 0 | 0.0% | 0.0% | 0 | 0.0% | 0.0% |
| Guatemala | 32 | 12.7% | 0.3% | 37 | 12.6% | 0.5% |
| Guinea | 18 | 22.2% | 0.3% | 35 | 21.9% | 1.1% |
| Guinea-Bissau | 2 | 25.0% | 0.3% | 3 | 20.0% | 0.7% |
| Guyana | 0 | 0.0% | 0.0% | 0 | 0.0% | 0.0% |
| Haiti | 0 | 0.0% | 0.0% | 0 | 0.0% | 0.0% |
| Honduras | 21 | 10.2% | 0.4% | 32 | 10.3% | 0.6% |
| Hungary | 284 | 6.8% | 0.9% | 385 | 6.8% | 1.2% |
| Iceland | 0 | 0.0% | 0.0% | 0 | 0.0% | 0.0% |
| India | 7419 | 32.6% | 1.0% | 19207 | 32.6% | 2.8% |
| Indonesia | 830 | 8.5% | 0.4% | 2465 | 8.5% | 1.3% |
| Iran, Islamic Republic of | 523 | 15.6% | 0.9% | 1179 | 15.6% | 1.6% |
| Iraq | 98 | 21.8% | 0.5% | 516 | 21.8% | 3.3% |
| Ireland | 0 | 0.0% | 0.0% | 0 | 0.0% | 0.0% |
| Israel | 118 | 9.9% | 0.8% | 181 | 10.0% | 1.2% |
| Italy | 1087 | 7.1% | 0.6% | 2014 | 7.1% | 0.9% |
| Jamaica | 8 | 4.1% | 0.2% | 14 | 4.0% | 0.4% |
| Japan | 828 | 2.0% | 0.2% | 1934 | 2.0% | 0.3% |
| Jordan | 24 | 12.3% | 0.4% | 103 | 12.1% | 1.8% |
| Kazakhstan | 117 | 19.3% | 0.7% | 736 | 19.3% | 4.5% |
| Kenya | 10 | 2.1% | 0.0% | 9 | 2.1% | 0.1% |
| Korea, Democratic People Republic of | 2279 | 33.0% | 7.1% | 2595 | 33.0% | 8.9% |
| Korea, Republic of | 1322 | 13.0% | 1.2% | 2758 | 13.0% | 2.2% |
| Kuwait | 20 | 38.5% | 0.9% | 59 | 38.1% | 2.8% |
| Kyrgyzstan | 54 | 29.2% | 1.4% | 175 | 29.3% | 5.3% |
| Lao People's Democratic Republic | 26 | 9.8% | 0.6% | 67 | 9.6% | 1.5% |
| Latvia | 9 | 3.7% | 0.2% | 29 | 3.7% | 0.5% |
| Lebanon | 64 | 11.4% | 1.0% | 114 | 11.3% | 1.8% |
| Lesotho | 2 | 5.4% | 0.2% | 2 | 6.4% | 0.3% |
| Liberia | 5 | 20.0% | 0.2% | 12 | 19.1% | 0.8% |
| Libya | 14 | 14.3% | 0.3% | 123 | 14.7% | 3.1% |
| Lithuania | 7 | 1.8% | 0.1% | 21 | 1.9% | 0.2% |
| Luxembourg | 2 | 1.3% | 0.1% | 2 | 0.9% | 0.1% |
| Madagascar | 7 | 5.2% | 0.1% | 10 | 5.0% | 0.1% |
| Malawi | 4 | 7.7% | 0.0% | 6 | 7.0% | 0.1% |
| Malaysia | 131 | 10.0% | 0.5% | 421 | 10.0% | 1.7% |
| Maldives | 0 | 0.0% | 0.0% | 1 | 2.7% | 0.4% |
| Mali | 23 | 22.6% | 0.2% | 44 | 22.8% | 0.8% |
| Malta | 2 | 3.2% | 0.2% | 6 | 3.7% | 0.4% |
| Mauritania | 4 | 22.2% | 0.2% | 9 | 24.3% | 0.7% |
| Mauritius | 0 | 0.0% | 0.0% | 1 | 0.8% | 0.1% |
| Mexico | 320 | 10.0% | 0.3% | 507 | 10.0% | 0.6% |
| Moldova | 12 | 4.2% | 0.2% | 48 | 4.1% | 0.7% |
| Mongolia | 29 | 30.2% | 0.9% | 127 | 30.4% | 3.7% |
| Montenegro | 15 | 13.8% | 1.2% | 42 | 13.5% | 3.3% |
| Morocco | 26 | 2.8% | 0.1% | 217 | 2.7% | 0.7% |
| Mozambique | 4 | 5.9% | 0.0% | 8 | 5.6% | 0.1% |
| Myanmar | 573 | 14.7% | 1.4% | 735 | 14.7% | 2.1% |
| Namibia | 1 | 2.6% | 0.1% | 1 | 1.9% | 0.1% |
| Nepal | 208 | 23.0% | 1.7% | 353 | 23.1% | 3.6% |
| New Caledonia | 0 | 0.0% | 0.0% | 0 | 0.0% | 0.0% |
| New Zealand | 0 | 0.0% | 0.0% | 0 | 0.0% | 0.0% |
| Nicaragua | 12 | 8.3% | 0.3% | 16 | 8.5% | 0.4% |
| Niger | 1 | 20.0% | 0.0% | 28 | 28.9% | 0.6% |
| Nigeria | 275 | 31.9% | 0.4% | 259 | 31.9% | 0.6% |
| North Macedonia | 52 | 18.8% | 1.6% | 162 | 18.6% | 4.0% |
| Norway | 0 | 0.0% | 0.0% | 0 | 0.0% | 0.0% |
| Oman | 7 | 21.2% | 0.5% | 26 | 21.0% | 1.1% |
| Pakistan | 623 | 32.9% | 0.6% | 2491 | 32.9% | 2.9% |
| Panama | 5 | 3.8% | 0.1% | 9 | 3.8% | 0.2% |
| Papua New Guinea | 0 | 0.0% | 0.0% | 0 | 0.0% | 0.0% |
| Paraguay | 8 | 4.7% | 0.1% | 33 | 4.5% | 0.5% |
| Peru | 234 | 15.9% | 0.6% | 228 | 15.8% | 0.7% |
| Philippines | 776 | 10.9% | 0.7% | 1803 | 10.9% | 2.2% |
| Poland | 1309 | 11.7% | 1.4% | 2253 | 11.7% | 2.1% |
| Portugal | 0 | 0.0% | 0.0% | 0 | 0.0% | 0.0% |
| Puerto Rico | 0 | 0.0% | 0.0% | 0 | 0.0% | 0.0% |
| Qatar | 6 | 40.0% | 0.9% | 29 | 37.7% | 2.7% |
| Romania | 187 | 5.8% | 0.4% | 495 | 5.8% | 0.9% |
| Russian Federation | 27 | 0.2% | 0.0% | 107 | 0.2% | 0.0% |
| Rwanda | 12 | 19.1% | 0.3% | 32 | 19.9% | 1.0% |
| Saint Lucia | 0 | 0.0% | 0.0% | 0 | 0.0% | 0.0% |
| Samoa | 0 | 0.0% | 0.0% | 0 | 0.0% | 0.0% |
| Sao Tome and Principe | 1 | 16.7% | 1.5% | 2 | 20.0% | 2.6% |
| Saudi Arabia | 95 | 34.2% | 0.7% | 321 | 34.2% | 2.2% |
| Senegal | 19 | 22.6% | 0.3% | 39 | 22.3% | 0.9% |
| Serbia | 316 | 14.3% | 1.7% | 667 | 14.3% | 3.0% |
| Sierra Leone | 0 | 0.0% | 0.0% | 12 | 23.1% | 1.4% |
| Singapore | 42 | 4.4% | 0.4% | 87 | 4.4% | 0.7% |
| Slovakia | 68 | 8.5% | 0.5% | 156 | 8.5% | 1.0% |
| Slovenia | 50 | 7.3% | 0.8% | 76 | 7.3% | 1.0% |
| Solomon Islands | 0 | 0.0% | 0.0% | 0 | 0.0% | 0.0% |
| Somalia | 5 | 4.0% | 0.1% | 6 | 4.1% | 0.2% |
| South Africa | 245 | 7.2% | 0.4% | 436 | 7.2% | 0.9% |
| South Sudan | 6 | 10.2% | 0.2% | 7 | 9.7% | 0.3% |
| Spain | 131 | 1.6% | 0.1% | 340 | 1.6% | 0.2% |
| Sri Lanka | 67 | 11.9% | 0.4% | 197 | 11.8% | 1.3% |
| Sudan | 27 | 10.1% | 0.2% | 42 | 10.3% | 0.4% |
| Suriname | 1 | 2.5% | 0.2% | 1 | 1.4% | 0.2% |
| Sweden | 0 | 0.0% | 0.0% | 0 | 0.0% | 0.0% |
| Switzerland | 33 | 1.5% | 0.2% | 42 | 1.5% | 0.2% |
| Syrian Arab Republic | 77 | 11.8% | 0.7% | 236 | 11.9% | 2.4% |
| Tajikistan | 52 | 40.9% | 1.5% | 90 | 41.1% | 3.1% |
| Tanzania, United Republic of | 18 | 4.7% | 0.1% | 19 | 4.7% | 0.1% |
| Thailand | 1047 | 12.6% | 1.1% | 1918 | 12.6% | 2.2% |
| The Netherlands | 223 | 3.2% | 0.4% | 248 | 3.2% | 0.4% |
| The Republic of the Gambia | 1 | 20.0% | 0.1% | 11 | 22.0% | 2.1% |
| Timor-Leste | 2 | 7.1% | 0.4% | 6 | 9.5% | 1.6% |
| Togo | 4 | 18.2% | 0.1% | 12 | 19.3% | 0.5% |
| Trinidad and Tobago | 0 | 0.0% | 0.0% | 0 | 0.0% | 0.0% |
| Tunisia | 45 | 12.3% | 0.5% | 341 | 12.4% | 3.1% |
| Turkmenistan | 26 | 19.7% | 0.7% | 74 | 19.9% | 2.5% |
| T�rkiye | 832 | 10.4% | 0.8% | 3439 | 10.4% | 2.7% |
| Uganda | 47 | 17.5% | 0.2% | 51 | 17.4% | 0.3% |
| Ukraine | 154 | 4.7% | 0.2% | 645 | 4.7% | 0.9% |
| United Arab Emirates | 16 | 24.6% | 0.6% | 47 | 25.5% | 1.8% |
| United Kingdom | 457 | 1.8% | 0.2% | 471 | 1.8% | 0.2% |
| United States of America | 0 | 0.0% | 0.0% | 0 | 0.0% | 0.0% |
| Uruguay | 0 | 0.0% | 0.0% | 0 | 0.0% | 0.0% |
| Uzbekistan | 217 | 32.0% | 1.1% | 595 | 32.1% | 3.8% |
| Vanuatu | 0 | 0.0% | 0.0% | 0 | 0.0% | 0.0% |
| Venezuela | 187 | 8.2% | 0.6% | 260 | 8.2% | 0.9% |
| Viet Nam | 710 | 9.6% | 0.8% | 1628 | 9.6% | 1.7% |
| Yemen | 81 | 24.5% | 0.9% | 108 | 24.4% | 1.5% |
| Zambia | 6 | 6.0% | 0.1% | 8 | 6.1% | 0.1% |
| Zimbabwe | 5 | 2.8% | 0.0% | 7 | 2.7% | 0.1% |

## Ultraviolet radiation

**Table 5.9.1.** Proportion and number of melanoma cases attributable to UV radiation, women and men

| **Country** | **Women** | | | **Men** | | |
| --- | --- | --- | --- | --- | --- | --- |
| **N** | **PAF UVR** | **PAF all** | **N** | **PAF UVR** | **PAF all** |
| Afghanistan | 0 | 0.0% | 0.0% | 0 | 0.0% | 0.0% |
| Albania | 0 | 0.0% | 0.0% | 19 | 37.3% | 0.4% |
| Algeria | 0 | 0.0% | 0.0% | 0 | 0.0% | 0.0% |
| Angola | 0 | 0.0% | 0.0% | 0 | 0.0% | 0.0% |
| Argentina | 0 | 0.0% | 0.0% | 430 | 45.1% | 0.7% |
| Armenia | 0 | 0.0% | 0.0% | 0 | 0.0% | 0.0% |
| Australia | 5143 | 86.9% | 7.3% | 10536 | 96.6% | 13.0% |
| Austria | 754 | 75.2% | 3.6% | 1063 | 87.7% | 4.3% |
| Azerbaijan | 0 | 0.0% | 0.0% | 0 | 0.0% | 0.0% |
| Bahamas | 0 | 0.0% | 0.0% | 0 | 0.0% | 0.0% |
| Bahrain | 0 | 0.0% | 0.0% | 0 | 0.0% | 0.0% |
| Bangladesh | 0 | 0.0% | 0.0% | 0 | 0.0% | 0.0% |
| Barbados | 0 | 0.0% | 0.0% | 0 | 0.0% | 0.0% |
| Belarus | 416 | 61.9% | 2.0% | 348 | 80.7% | 1.4% |
| Belgium | 2009 | 85.3% | 5.9% | 1645 | 91.0% | 4.2% |
| Belize | 3 | 60.0% | 1.5% | 5 | 71.4% | 3.0% |
| Benin | 0 | 0.0% | 0.0% | 0 | 0.0% | 0.0% |
| Bhutan | 0 | 0.0% | 0.0% | 0 | 0.0% | 0.0% |
| Bolivia | 48 | 23.5% | 0.5% | 33 | 32.0% | 0.5% |
| Bosnia Herzegovina | 52 | 38.2% | 0.8% | 161 | 80.5% | 2.1% |
| Botswana | 0 | 0.0% | 0.0% | 0 | 0.0% | 0.0% |
| Brazil | 0 | 0.0% | 0.0% | 2893 | 58.4% | 1.0% |
| Brunei Darussalam | 0 | 0.0% | 0.0% | 0 | 0.0% | 0.0% |
| Bulgaria | 3 | 1.4% | 0.0% | 150 | 61.0% | 0.9% |
| Burkina Faso | 0 | 0.0% | 0.0% | 0 | 0.0% | 0.0% |
| Burundi | 0 | 0.0% | 0.0% | 0 | 0.0% | 0.0% |
| Cambodia | 0 | 0.0% | 0.0% | 0 | 0.0% | 0.0% |
| Cameroon | 0 | 0.0% | 0.0% | 0 | 0.0% | 0.0% |
| Canada | 4077 | 82.4% | 3.6% | 5968 | 92.8% | 5.0% |
| Cape Verde | 0 | 0.0% | 0.0% | 0 | 0.0% | 0.0% |
| Central African Republic | 0 | 0.0% | 0.0% | 0 | 0.0% | 0.0% |
| Chad | 0 | 0.0% | 0.0% | 0 | 0.0% | 0.0% |
| Chile | 0 | 0.0% | 0.0% | 297 | 53.1% | 1.0% |
| China | 0 | 0.0% | 0.0% | 0 | 0.0% | 0.0% |
| Colombia | 0 | 0.0% | 0.0% | 312 | 36.1% | 0.6% |
| Comoros | 0 | 0.0% | 0.0% | 0 | 0.0% | 0.0% |
| Congo, Democratic Republic of | 0 | 0.0% | 0.0% | 0 | 0.0% | 0.0% |
| Congo, Republic of | 0 | 0.0% | 0.0% | 0 | 0.0% | 0.0% |
| Costa Rica | 0 | 0.0% | 0.0% | 1 | 1.3% | 0.0% |
| Croatia | 300 | 73.7% | 2.4% | 506 | 90.5% | 3.4% |
| Cuba | 0 | 0.0% | 0.0% | 2 | 1.6% | 0.0% |
| Cyprus | 28 | 53.9% | 0.9% | 48 | 80.0% | 1.6% |
| Czechia | 1113 | 79.4% | 3.9% | 1376 | 89.9% | 4.2% |
| C�te d'Ivoire | 0 | 0.0% | 0.0% | 0 | 0.0% | 0.0% |
| Denmark | 1473 | 87.6% | 7.0% | 1361 | 93.0% | 5.9% |
| Djibouti | 0 | 0.0% | 0.0% | 0 | 0.0% | 0.0% |
| Dominican Republic | 0 | 0.0% | 0.0% | 0 | 0.0% | 0.0% |
| Ecuador | 0 | 0.0% | 0.0% | 84 | 33.2% | 0.6% |
| Egypt | 0 | 0.0% | 0.0% | 0 | 0.0% | 0.0% |
| El Salvador | 0 | 0.0% | 0.0% | 1 | 3.9% | 0.0% |
| Equatorial Guinea | 0 | 0.0% | 0.0% | 0 | 0.0% | 0.0% |
| Eritrea | 0 | 0.0% | 0.0% | 0 | 0.0% | 0.0% |
| Estonia | 119 | 77.3% | 3.2% | 98 | 86.0% | 2.4% |
| Eswatini | 0 | 0.0% | 0.0% | 0 | 0.0% | 0.0% |
| Ethiopia | 0 | 0.0% | 0.0% | 0 | 0.0% | 0.0% |
| Fiji | 0 | 0.0% | 0.0% | 0 | 0.0% | 0.0% |
| Finland | 924 | 84.0% | 5.5% | 1076 | 92.7% | 5.8% |
| France (metropolitan) | 6106 | 77.8% | 3.0% | 6867 | 87.1% | 2.9% |
| France, Guadeloupe | 0 | 0.0% | 0.0% | 2 | 25.0% | 0.2% |
| France, La R�union | 0 | 0.0% | 0.0% | 0 | 0.0% | 0.0% |
| France, Martinique | 0 | 0.0% | 0.0% | 3 | 33.3% | 0.3% |
| French Guyana | 0 | 0.0% | 0.0% | 0 | 0.0% | 0.0% |
| French Polynesia | 0 | 0.0% | 0.0% | 0 | 0.0% | 0.0% |
| Gabon | 0 | 0.0% | 0.0% | 0 | 0.0% | 0.0% |
| Gaza Strip and West Bank | 0 | 0.0% | 0.0% | 0 | 0.0% | 0.0% |
| Georgia | 0 | 0.0% | 0.0% | 0 | 0.0% | 0.0% |
| Germany | 8074 | 78.3% | 3.2% | 10288 | 88.2% | 3.7% |
| Ghana | 0 | 0.0% | 0.0% | 0 | 0.0% | 0.0% |
| Greece | 335 | 53.7% | 1.2% | 639 | 76.6% | 1.8% |
| Guam | 0 | 0.0% | 0.0% | 0 | 0.0% | 0.0% |
| Guatemala | 0 | 0.0% | 0.0% | 0 | 0.0% | 0.0% |
| Guinea | 0 | 0.0% | 0.0% | 0 | 0.0% | 0.0% |
| Guinea-Bissau | 0 | 0.0% | 0.0% | 0 | 0.0% | 0.0% |
| Guyana | 0 | 0.0% | 0.0% | 0 | 0.0% | 0.0% |
| Haiti | 0 | 0.0% | 0.0% | 0 | 0.0% | 0.0% |
| Honduras | 0 | 0.0% | 0.0% | 0 | 0.0% | 0.0% |
| Hungary | 463 | 62.9% | 1.5% | 573 | 83.3% | 1.8% |
| Iceland | 21 | 72.4% | 2.6% | 21 | 84.0% | 2.5% |
| India | 0 | 0.0% | 0.0% | 0 | 0.0% | 0.0% |
| Indonesia | 0 | 0.0% | 0.0% | 0 | 0.0% | 0.0% |
| Iran, Islamic Republic of | 0 | 0.0% | 0.0% | 0 | 0.0% | 0.0% |
| Iraq | 0 | 0.0% | 0.0% | 0 | 0.0% | 0.0% |
| Ireland | 649 | 86.3% | 5.2% | 757 | 92.9% | 5.3% |
| Israel | 0 | 0.0% | 0.0% | 343 | 49.1% | 2.3% |
| Italy | 4352 | 67.5% | 2.2% | 6216 | 84.9% | 2.9% |
| Jamaica | 0 | 0.0% | 0.0% | 0 | 0.0% | 0.0% |
| Japan | 0 | 0.0% | 0.0% | 0 | 0.0% | 0.0% |
| Jordan | 0 | 0.0% | 0.0% | 0 | 0.0% | 0.0% |
| Kazakhstan | 0 | 0.0% | 0.0% | 0 | 0.0% | 0.0% |
| Kenya | 0 | 0.0% | 0.0% | 0 | 0.0% | 0.0% |
| Korea, Democratic People Republic of | 0 | 0.0% | 0.0% | 0 | 0.0% | 0.0% |
| Korea, Republic of | 0 | 0.0% | 0.0% | 0 | 0.0% | 0.0% |
| Kuwait | 0 | 0.0% | 0.0% | 0 | 0.0% | 0.0% |
| Kyrgyzstan | 0 | 0.0% | 0.0% | 0 | 0.0% | 0.0% |
| Lao People's Democratic Republic | 0 | 0.0% | 0.0% | 0 | 0.0% | 0.0% |
| Latvia | 98 | 65.3% | 1.8% | 61 | 74.4% | 1.1% |
| Lebanon | 0 | 0.0% | 0.0% | 0 | 0.0% | 0.0% |
| Lesotho | 0 | 0.0% | 0.0% | 0 | 0.0% | 0.0% |
| Liberia | 0 | 0.0% | 0.0% | 0 | 0.0% | 0.0% |
| Libya | 0 | 0.0% | 0.0% | 0 | 0.0% | 0.0% |
| Lithuania | 115 | 60.2% | 1.6% | 126 | 79.3% | 1.4% |
| Luxembourg | 46 | 73.0% | 3.1% | 79 | 88.8% | 5.2% |
| Madagascar | 0 | 0.0% | 0.0% | 0 | 0.0% | 0.0% |
| Malawi | 0 | 0.0% | 0.0% | 0 | 0.0% | 0.0% |
| Malaysia | 0 | 0.0% | 0.0% | 0 | 0.0% | 0.0% |
| Maldives | 0 | 0.0% | 0.0% | 0 | 0.0% | 0.0% |
| Mali | 0 | 0.0% | 0.0% | 0 | 0.0% | 0.0% |
| Malta | 23 | 67.7% | 1.8% | 38 | 84.4% | 2.6% |
| Mauritania | 0 | 0.0% | 0.0% | 0 | 0.0% | 0.0% |
| Mauritius | 0 | 0.0% | 0.0% | 0 | 0.0% | 0.0% |
| Mexico | 0 | 0.0% | 0.0% | 30 | 2.4% | 0.0% |
| Moldova | 37 | 34.3% | 0.6% | 95 | 69.8% | 1.3% |
| Mongolia | 0 | 0.0% | 0.0% | 0 | 0.0% | 0.0% |
| Montenegro | 34 | 75.6% | 2.8% | 31 | 88.6% | 2.4% |
| Morocco | 0 | 0.0% | 0.0% | 0 | 0.0% | 0.0% |
| Mozambique | 0 | 0.0% | 0.0% | 0 | 0.0% | 0.0% |
| Myanmar | 0 | 0.0% | 0.0% | 0 | 0.0% | 0.0% |
| Namibia | 0 | 0.0% | 0.0% | 0 | 0.0% | 0.0% |
| Nepal | 0 | 0.0% | 0.0% | 0 | 0.0% | 0.0% |
| New Caledonia | 0 | 0.0% | 0.0% | 0 | 0.0% | 0.0% |
| New Zealand | 1098 | 92.1% | 8.6% | 1481 | 95.7% | 10.0% |
| Nicaragua | 0 | 0.0% | 0.0% | 0 | 0.0% | 0.0% |
| Niger | 0 | 0.0% | 0.0% | 0 | 0.0% | 0.0% |
| Nigeria | 0 | 0.0% | 0.0% | 0 | 0.0% | 0.0% |
| North Macedonia | 43 | 61.4% | 1.3% | 99 | 83.2% | 2.5% |
| Norway | 1405 | 90.8% | 8.1% | 1547 | 95.4% | 7.7% |
| Oman | 0 | 0.0% | 0.0% | 0 | 0.0% | 0.0% |
| Pakistan | 0 | 0.0% | 0.0% | 0 | 0.0% | 0.0% |
| Panama | 0 | 0.0% | 0.0% | 0 | 0.0% | 0.0% |
| Papua New Guinea | 0 | 0.0% | 0.0% | 0 | 0.0% | 0.0% |
| Paraguay | 28 | 21.4% | 0.4% | 74 | 54.4% | 1.1% |
| Peru | 0 | 0.0% | 0.0% | 349 | 50.4% | 1.1% |
| Philippines | 0 | 0.0% | 0.0% | 0 | 0.0% | 0.0% |
| Poland | 820 | 43.1% | 0.9% | 1436 | 77.7% | 1.4% |
| Portugal | 382 | 58.3% | 1.3% | 402 | 71.8% | 1.1% |
| Puerto Rico | 0 | 0.0% | 0.0% | 4 | 6.9% | 0.1% |
| Qatar | 0 | 0.0% | 0.0% | 0 | 0.0% | 0.0% |
| Romania | 622 | 55.7% | 1.4% | 899 | 79.6% | 1.6% |
| Russian Federation | 3977 | 51.8% | 1.2% | 4048 | 77.5% | 1.4% |
| Rwanda | 0 | 0.0% | 0.0% | 0 | 0.0% | 0.0% |
| Saint Lucia | 0 | 0.0% | 0.0% | 0 | 0.0% | 0.0% |
| Samoa | 0 | 0.0% | 0.0% | 0 | 0.0% | 0.0% |
| Sao Tome and Principe | 0 | 0.0% | 0.0% | 0 | 0.0% | 0.0% |
| Saudi Arabia | 0 | 0.0% | 0.0% | 0 | 0.0% | 0.0% |
| Senegal | 0 | 0.0% | 0.0% | 0 | 0.0% | 0.0% |
| Serbia | 172 | 43.8% | 0.9% | 408 | 80.3% | 1.8% |
| Sierra Leone | 0 | 0.0% | 0.0% | 0 | 0.0% | 0.0% |
| Singapore | 0 | 0.0% | 0.0% | 0 | 0.0% | 0.0% |
| Slovakia | 315 | 71.3% | 2.4% | 542 | 90.8% | 3.4% |
| Slovenia | 246 | 80.4% | 3.9% | 330 | 91.2% | 4.4% |
| Solomon Islands | 0 | 0.0% | 0.0% | 0 | 0.0% | 0.0% |
| Somalia | 0 | 0.0% | 0.0% | 0 | 0.0% | 0.0% |
| South Africa | 0 | 0.0% | 0.0% | 0 | 0.0% | 0.0% |
| South Sudan | 0 | 0.0% | 0.0% | 0 | 0.0% | 0.0% |
| Spain | 1431 | 49.9% | 1.2% | 2247 | 74.9% | 1.5% |
| Sri Lanka | 0 | 0.0% | 0.0% | 0 | 0.0% | 0.0% |
| Sudan | 0 | 0.0% | 0.0% | 0 | 0.0% | 0.0% |
| Suriname | 0 | 0.0% | 0.0% | 0 | 0.0% | 0.0% |
| Sweden | 2284 | 89.1% | 8.1% | 2535 | 94.0% | 7.5% |
| Switzerland | 899 | 81.7% | 4.1% | 1180 | 89.5% | 4.5% |
| Syrian Arab Republic | 0 | 0.0% | 0.0% | 0 | 0.0% | 0.0% |
| Tajikistan | 0 | 0.0% | 0.0% | 0 | 0.0% | 0.0% |
| Tanzania, United Republic of | 0 | 0.0% | 0.0% | 0 | 0.0% | 0.0% |
| Thailand | 0 | 0.0% | 0.0% | 0 | 0.0% | 0.0% |
| The Netherlands | 3630 | 87.6% | 6.6% | 3810 | 93.4% | 6.3% |
| The Republic of the Gambia | 0 | 0.0% | 0.0% | 0 | 0.0% | 0.0% |
| Timor-Leste | 0 | 0.0% | 0.0% | 0 | 0.0% | 0.0% |
| Togo | 0 | 0.0% | 0.0% | 0 | 0.0% | 0.0% |
| Trinidad and Tobago | 0 | 0.0% | 0.0% | 0 | 0.0% | 0.0% |
| Tunisia | 0 | 0.0% | 0.0% | 0 | 0.0% | 0.0% |
| Turkmenistan | 0 | 0.0% | 0.0% | 0 | 0.0% | 0.0% |
| T�rkiye | 0 | 0.0% | 0.0% | 0 | 0.0% | 0.0% |
| Uganda | 0 | 0.0% | 0.0% | 0 | 0.0% | 0.0% |
| Ukraine | 1059 | 50.9% | 1.4% | 1118 | 73.3% | 1.5% |
| United Arab Emirates | 0 | 0.0% | 0.0% | 0 | 0.0% | 0.0% |
| United Kingdom | 7864 | 82.4% | 3.9% | 9237 | 90.8% | 4.2% |
| United States of America | 32964 | 81.1% | 3.7% | 56898 | 93.6% | 6.1% |
| Uruguay | 0 | 0.0% | 0.0% | 83 | 62.4% | 1.0% |
| Uzbekistan | 0 | 0.0% | 0.0% | 0 | 0.0% | 0.0% |
| Vanuatu | 0 | 0.0% | 0.0% | 0 | 0.0% | 0.0% |
| Venezuela | 0 | 0.0% | 0.0% | 36 | 12.3% | 0.1% |
| Viet Nam | 0 | 0.0% | 0.0% | 0 | 0.0% | 0.0% |
| Yemen | 0 | 0.0% | 0.0% | 0 | 0.0% | 0.0% |
| Zambia | 0 | 0.0% | 0.0% | 0 | 0.0% | 0.0% |
| Zimbabwe | 0 | 0.0% | 0.0% | 0 | 0.0% | 0.0% |

## Infectious agents

**Table 5.10.1.** Proportion and number of cancer cases attributable to infections, women and men

| **Country** | **Women** | | | **Men** | | |
| --- | --- | --- | --- | --- | --- | --- |
| **N** | **PAF infections** | **PAF all** | **N** | **PAF infections** | **PAF all** |
| Afghanistan | 2099 | 61.8% | 1.2% | 1385 | 35.8% | 1.1% |
| Albania | 447 | 59.1% | 1.0% | 464 | 33.9% | 0.9% |
| Algeria | 3758 | 62.1% | 0.8% | 3061 | 33.6% | 0.9% |
| Angola | 4015 | 77.9% | 2.1% | 1494 | 48.5% | 1.2% |
| Argentina | 6816 | 58.1% | 0.7% | 3738 | 29.0% | 0.5% |
| Armenia | 471 | 56.9% | 0.8% | 473 | 36.7% | 0.8% |
| Australia | 2931 | 33.3% | 0.3% | 3732 | 24.6% | 0.4% |
| Austria | 1166 | 37.4% | 0.4% | 1156 | 22.4% | 0.4% |
| Azerbaijan | 1287 | 60.0% | 1.1% | 1385 | 42.4% | 1.2% |
| Bahamas | 63 | 72.4% | 1.0% | 33 | 36.9% | 0.6% |
| Bahrain | 42 | 43.7% | 0.4% | 49 | 23.0% | 0.6% |
| Bangladesh | 12942 | 58.1% | 1.3% | 7844 | 23.6% | 0.7% |
| Barbados | 52 | 53.8% | 0.7% | 31 | 37.0% | 0.5% |
| Belarus | 1894 | 56.4% | 0.7% | 2032 | 34.0% | 0.7% |
| Belgium | 1460 | 30.3% | 0.3% | 1389 | 16.9% | 0.3% |
| Belize | 42 | 77.7% | 1.5% | 14 | 33.8% | 0.7% |
| Benin | 1052 | 80.2% | 1.9% | 642 | 62.0% | 1.6% |
| Bhutan | 82 | 72.1% | 2.1% | 76 | 48.1% | 1.8% |
| Bolivia | 2777 | 77.8% | 2.1% | 776 | 44.4% | 0.9% |
| Bosnia Herzegovina | 588 | 49.2% | 0.7% | 502 | 28.4% | 0.6% |
| Botswana | 612 | 85.1% | 3.3% | 198 | 51.9% | 1.8% |
| Brazil | 31076 | 58.2% | 0.8% | 20454 | 30.7% | 0.6% |
| Brunei Darussalam | 87 | 66.6% | 1.2% | 57 | 50.1% | 1.2% |
| Bulgaria | 1613 | 56.5% | 0.8% | 1131 | 29.3% | 0.6% |
| Burkina Faso | 2097 | 67.6% | 1.7% | 1054 | 48.0% | 1.6% |
| Burundi | 1942 | 84.4% | 3.0% | 716 | 57.8% | 1.8% |
| Cambodia | 2197 | 62.9% | 1.5% | 2048 | 49.7% | 1.9% |
| Cameroon | 3750 | 81.0% | 2.3% | 2108 | 64.0% | 2.2% |
| Canada | 5012 | 29.1% | 0.3% | 5374 | 19.2% | 0.4% |
| Cape Verde | 59 | 77.5% | 1.9% | 26 | 41.3% | 1.0% |
| Central African Republic | 427 | 78.1% | 1.9% | 210 | 54.1% | 1.7% |
| Chad | 1734 | 76.1% | 2.7% | 922 | 51.8% | 1.4% |
| Chile | 3269 | 57.8% | 0.9% | 3038 | 42.5% | 0.8% |
| China | 312967 | 68.1% | 1.0% | 407367 | 55.1% | 1.4% |
| Colombia | 8683 | 63.4% | 1.0% | 6018 | 44.0% | 0.9% |
| Comoros | 183 | 86.8% | 3.5% | 26 | 37.0% | 0.9% |
| Congo, Democratic Republic of | 10936 | 83.7% | 2.7% | 3168 | 50.5% | 1.2% |
| Congo, Republic of | 505 | 79.5% | 2.3% | 132 | 38.6% | 0.9% |
| Costa Rica | 756 | 58.0% | 0.9% | 771 | 43.9% | 1.1% |
| Croatia | 751 | 38.6% | 0.4% | 746 | 25.2% | 0.4% |
| Cuba | 2004 | 47.7% | 0.7% | 1340 | 20.4% | 0.5% |
| Cyprus | 137 | 36.7% | 0.3% | 135 | 20.0% | 0.4% |
| Czechia | 1615 | 36.1% | 0.4% | 1236 | 19.1% | 0.3% |
| C�te d'Ivoire | 3391 | 83.8% | 2.1% | 1383 | 58.9% | 1.2% |
| Denmark | 849 | 27.8% | 0.3% | 577 | 12.0% | 0.2% |
| Djibouti | 91 | 76.7% | 1.3% | 39 | 39.0% | 1.1% |
| Dominican Republic | 1502 | 64.2% | 1.2% | 623 | 32.2% | 0.5% |
| Ecuador | 3159 | 64.9% | 1.4% | 1736 | 42.9% | 1.1% |
| Egypt | 13470 | 60.5% | 1.3% | 20254 | 52.5% | 2.3% |
| El Salvador | 1013 | 66.2% | 1.3% | 370 | 42.4% | 0.7% |
| Equatorial Guinea | 168 | 82.5% | 2.4% | 103 | 55.2% | 2.1% |
| Eritrea | 294 | 72.7% | 1.4% | 114 | 40.4% | 1.1% |
| Estonia | 323 | 46.2% | 0.6% | 233 | 27.1% | 0.5% |
| Eswatini | 485 | 92.7% | 4.7% | 97 | 69.5% | 2.4% |
| Ethiopia | 11148 | 76.4% | 1.6% | 3492 | 41.0% | 1.1% |
| Fiji | 194 | 72.7% | 1.5% | 53 | 30.2% | 0.7% |
| Finland | 577 | 26.9% | 0.2% | 522 | 15.6% | 0.2% |
| France (metropolitan) | 8940 | 32.3% | 0.3% | 9358 | 17.8% | 0.3% |
| France, Guadeloupe | 85 | 58.7% | 0.8% | 73 | 35.0% | 0.5% |
| France, La R�union | 161 | 61.1% | 0.9% | 150 | 34.6% | 0.7% |
| France, Martinique | 80 | 56.3% | 0.7% | 61 | 36.4% | 0.4% |
| French Guyana | 27 | 64.6% | 0.8% | 22 | 29.7% | 0.6% |
| French Polynesia | 31 | 53.8% | 0.5% | 34 | 35.2% | 0.6% |
| Gabon | 366 | 81.1% | 2.3% | 147 | 46.9% | 1.7% |
| Gaza Strip and West Bank | 187 | 45.6% | 0.5% | 191 | 29.2% | 0.6% |
| Georgia | 715 | 58.5% | 0.8% | 619 | 30.7% | 0.7% |
| Germany | 13976 | 33.8% | 0.4% | 11686 | 19.2% | 0.4% |
| Ghana | 4700 | 78.5% | 2.1% | 2804 | 55.5% | 2.1% |
| Greece | 1513 | 37.6% | 0.4% | 1947 | 20.7% | 0.5% |
| Guam | 27 | 69.6% | 1.0% | 24 | 38.6% | 0.9% |
| Guatemala | 2879 | 66.1% | 2.1% | 864 | 38.4% | 1.0% |
| Guinea | 3169 | 86.7% | 4.1% | 852 | 57.7% | 2.3% |
| Guinea-Bissau | 296 | 84.3% | 2.9% | 95 | 56.7% | 1.9% |
| Guyana | 150 | 79.3% | 1.6% | 26 | 26.7% | 0.4% |
| Haiti | 1312 | 61.0% | 1.4% | 760 | 38.9% | 0.9% |
| Honduras | 1242 | 67.6% | 1.6% | 573 | 35.5% | 1.0% |
| Hungary | 2026 | 42.7% | 0.5% | 1624 | 23.6% | 0.4% |
| Iceland | 39 | 35.0% | 0.3% | 22 | 12.4% | 0.2% |
| India | 158315 | 65.9% | 1.6% | 63755 | 21.6% | 0.8% |
| Indonesia | 45351 | 75.1% | 1.5% | 27141 | 42.6% | 1.2% |
| Iran, Islamic Republic of | 6642 | 46.0% | 0.8% | 9086 | 34.2% | 1.0% |
| Iraq | 1381 | 40.1% | 0.5% | 1291 | 29.1% | 0.7% |
| Ireland | 501 | 29.0% | 0.3% | 450 | 16.6% | 0.3% |
| Israel | 927 | 39.7% | 0.4% | 740 | 19.9% | 0.4% |
| Italy | 12214 | 36.4% | 0.4% | 14782 | 23.5% | 0.6% |
| Jamaica | 489 | 66.5% | 0.9% | 212 | 35.1% | 0.5% |
| Japan | 57717 | 57.4% | 1.0% | 92553 | 53.1% | 1.3% |
| Jordan | 405 | 45.6% | 0.4% | 462 | 26.3% | 0.7% |
| Kazakhstan | 3150 | 70.2% | 1.3% | 1944 | 41.8% | 1.0% |
| Kenya | 7866 | 79.1% | 2.0% | 2165 | 46.5% | 1.1% |
| Korea, Democratic People Republic of | 4967 | 67.4% | 1.1% | 5659 | 55.3% | 1.6% |
| Korea, Republic of | 14541 | 68.2% | 1.0% | 25604 | 59.9% | 1.7% |
| Kuwait | 142 | 43.6% | 0.5% | 189 | 29.9% | 0.7% |
| Kyrgyzstan | 796 | 70.0% | 1.5% | 627 | 48.8% | 1.6% |
| Lao People's Democratic Republic | 914 | 63.6% | 1.5% | 1053 | 52.7% | 1.9% |
| Latvia | 477 | 50.6% | 0.6% | 346 | 27.0% | 0.5% |
| Lebanon | 361 | 34.7% | 0.4% | 313 | 21.1% | 0.4% |
| Lesotho | 700 | 91.6% | 3.9% | 147 | 60.7% | 1.8% |
| Liberia | 942 | 84.6% | 2.9% | 319 | 55.7% | 1.8% |
| Libya | 553 | 61.1% | 1.0% | 365 | 29.0% | 0.8% |
| Lithuania | 633 | 56.3% | 0.6% | 544 | 30.1% | 0.5% |
| Luxembourg | 66 | 35.6% | 0.3% | 46 | 18.4% | 0.3% |
| Madagascar | 5030 | 81.3% | 2.9% | 1088 | 39.5% | 1.1% |
| Malawi | 6418 | 90.7% | 3.7% | 2259 | 68.5% | 2.6% |
| Malaysia | 3235 | 59.5% | 0.9% | 3407 | 43.8% | 1.2% |
| Maldives | 60 | 87.0% | 1.9% | 43 | 48.3% | 1.5% |
| Mali | 3507 | 81.8% | 2.7% | 1334 | 56.4% | 2.1% |
| Malta | 47 | 26.3% | 0.3% | 62 | 19.0% | 0.4% |
| Mauritania | 654 | 80.6% | 2.4% | 222 | 50.8% | 1.5% |
| Mauritius | 201 | 67.2% | 0.9% | 103 | 32.9% | 0.7% |
| Mexico | 16151 | 59.6% | 1.1% | 7088 | 31.9% | 0.7% |
| Moldova | 743 | 60.6% | 0.9% | 694 | 30.1% | 0.8% |
| Mongolia | 1405 | 69.5% | 3.2% | 1557 | 68.9% | 3.7% |
| Montenegro | 93 | 46.9% | 0.5% | 53 | 20.6% | 0.3% |
| Morocco | 4454 | 63.8% | 1.0% | 2564 | 31.4% | 0.7% |
| Mozambique | 7873 | 83.1% | 3.5% | 3626 | 69.8% | 3.1% |
| Myanmar | 11336 | 73.8% | 2.0% | 7229 | 48.8% | 1.7% |
| Namibia | 519 | 75.3% | 2.0% | 293 | 54.5% | 1.7% |
| Nepal | 2791 | 72.2% | 1.7% | 1105 | 31.7% | 1.0% |
| New Caledonia | 44 | 58.3% | 0.6% | 39 | 28.6% | 0.5% |
| New Zealand | 464 | 32.5% | 0.3% | 447 | 21.0% | 0.3% |
| Nicaragua | 1046 | 67.4% | 1.6% | 417 | 38.4% | 1.0% |
| Niger | 1140 | 69.8% | 1.2% | 975 | 53.9% | 1.7% |
| Nigeria | 18727 | 76.4% | 1.7% | 6130 | 50.7% | 1.1% |
| North Macedonia | 262 | 55.5% | 0.6% | 292 | 33.1% | 0.6% |
| Norway | 729 | 32.9% | 0.3% | 469 | 14.1% | 0.2% |
| Oman | 184 | 54.0% | 0.8% | 315 | 35.3% | 1.1% |
| Pakistan | 10131 | 47.2% | 0.8% | 7816 | 23.5% | 0.8% |
| Panama | 609 | 64.7% | 1.1% | 366 | 43.3% | 0.8% |
| Papua New Guinea | 1420 | 61.0% | 1.6% | 663 | 30.9% | 1.1% |
| Paraguay | 1383 | 77.0% | 1.5% | 506 | 35.1% | 0.6% |
| Peru | 8161 | 66.8% | 1.5% | 4200 | 47.0% | 1.1% |
| Philippines | 13349 | 66.2% | 0.9% | 8987 | 41.6% | 0.9% |
| Poland | 7475 | 46.2% | 0.6% | 6074 | 24.0% | 0.5% |
| Portugal | 2613 | 44.1% | 0.6% | 2781 | 27.7% | 0.6% |
| Puerto Rico | 412 | 41.1% | 0.5% | 310 | 20.9% | 0.4% |
| Qatar | 53 | 55.7% | 0.6% | 104 | 32.3% | 0.8% |
| Romania | 5576 | 58.6% | 0.9% | 4590 | 29.9% | 0.7% |
| Russian Federation | 37493 | 60.5% | 0.8% | 23654 | 34.4% | 0.7% |
| Rwanda | 1382 | 79.7% | 2.6% | 657 | 55.4% | 1.7% |
| Saint Lucia | 28 | 69.6% | 1.1% | 22 | 38.0% | 0.7% |
| Samoa | 17 | 62.8% | 0.6% | 13 | 30.4% | 0.6% |
| Sao Tome and Principe | 21 | 89.4% | 2.2% | 16 | 55.5% | 1.7% |
| Saudi Arabia | 1032 | 45.1% | 0.6% | 1799 | 35.5% | 1.0% |
| Senegal | 2830 | 81.2% | 2.7% | 845 | 52.1% | 1.7% |
| Serbia | 1527 | 45.8% | 0.6% | 1083 | 21.4% | 0.4% |
| Sierra Leone | 607 | 87.8% | 4.2% | 240 | 63.5% | 2.3% |
| Singapore | 964 | 48.6% | 0.6% | 1482 | 40.6% | 0.9% |
| Slovakia | 1055 | 46.5% | 0.6% | 819 | 22.7% | 0.4% |
| Slovenia | 347 | 34.1% | 0.4% | 372 | 23.1% | 0.4% |
| Solomon Islands | 84 | 79.5% | 1.5% | 28 | 34.5% | 0.8% |
| Somalia | 1640 | 78.2% | 1.8% | 533 | 45.7% | 1.1% |
| South Africa | 13908 | 76.0% | 1.8% | 5238 | 43.5% | 0.9% |
| South Sudan | 1104 | 78.4% | 2.0% | 499 | 51.7% | 1.5% |
| Spain | 6329 | 32.4% | 0.4% | 7427 | 19.1% | 0.4% |
| Sri Lanka | 1997 | 56.3% | 0.8% | 874 | 16.0% | 0.5% |
| Sudan | 2169 | 61.9% | 0.9% | 1387 | 36.1% | 1.0% |
| Suriname | 99 | 70.4% | 1.3% | 35 | 32.5% | 0.5% |
| Sweden | 1209 | 30.1% | 0.3% | 804 | 12.8% | 0.2% |
| Switzerland | 1001 | 29.9% | 0.3% | 1075 | 17.1% | 0.3% |
| Syrian Arab Republic | 726 | 42.3% | 0.4% | 688 | 28.3% | 0.6% |
| Tajikistan | 713 | 65.0% | 1.5% | 590 | 52.0% | 1.7% |
| Tanzania, United Republic of | 12837 | 87.3% | 3.5% | 2687 | 51.5% | 1.3% |
| Thailand | 14211 | 51.3% | 1.1% | 12624 | 35.5% | 1.2% |
| The Netherlands | 2045 | 25.8% | 0.3% | 1787 | 13.9% | 0.2% |
| The Republic of the Gambia | 382 | 90.5% | 4.0% | 167 | 55.7% | 2.7% |
| Timor-Leste | 102 | 75.7% | 1.6% | 65 | 46.5% | 1.5% |
| Togo | 781 | 78.5% | 1.9% | 356 | 50.1% | 1.3% |
| Trinidad and Tobago | 243 | 62.8% | 0.9% | 85 | 25.6% | 0.4% |
| Tunisia | 993 | 51.6% | 0.8% | 1027 | 28.3% | 0.8% |
| Turkmenistan | 695 | 69.6% | 1.4% | 433 | 41.7% | 1.2% |
| T�rkiye | 8395 | 49.3% | 0.6% | 9908 | 29.4% | 0.6% |
| Uganda | 9766 | 85.4% | 3.4% | 4598 | 65.0% | 2.5% |
| Ukraine | 8902 | 63.6% | 0.8% | 5780 | 29.9% | 0.7% |
| United Arab Emirates | 244 | 54.4% | 0.6% | 199 | 28.4% | 0.6% |
| United Kingdom | 7803 | 26.6% | 0.3% | 6570 | 14.1% | 0.3% |
| United States of America | 40093 | 33.0% | 0.3% | 45749 | 22.4% | 0.4% |
| Uruguay | 684 | 54.0% | 0.6% | 442 | 26.5% | 0.5% |
| Uzbekistan | 4048 | 70.8% | 1.5% | 2207 | 40.4% | 1.2% |
| Vanuatu | 29 | 66.8% | 1.4% | 13 | 33.7% | 1.0% |
| Venezuela | 5355 | 67.8% | 1.3% | 2490 | 35.6% | 0.7% |
| Viet Nam | 15764 | 72.6% | 1.3% | 26666 | 63.3% | 2.3% |
| Yemen | 918 | 49.6% | 0.7% | 1111 | 40.6% | 1.3% |
| Zambia | 5002 | 90.8% | 4.1% | 2026 | 75.2% | 2.7% |
| Zimbabwe | 4782 | 83.5% | 3.1% | 1330 | 57.4% | 1.7% |

**Table 5.10.2.** Proportion and number of cancer cases attributable to infections, women

| **Country** | **Lip, oral cavity** | **Oropharynx** | **Nasopharynx** | **Stomach** | **Anus** | **Liver and intrahepatic bile ducts** | **Larynx** | **Kaposi sarcoma** | **Vulva** | **Vagina** | **Cervix uteri** | **Bladder** | **Hodgkin lymphoma** | **Non-Hodgkin lymphoma** |
| --- | --- | --- | --- | --- | --- | --- | --- | --- | --- | --- | --- | --- | --- | --- |
| **N (PAF)** | **N (PAF)** | **N (PAF)** | **N (PAF)** | **N (PAF)** | **N (PAF)** | **N (PAF)** | **N (PAF)** | **N (PAF)** | **N (PAF)** | **N (PAF)** | **N (PAF)** | **N (PAF)** | **N (PAF)** |
| Afghanistan | 10 (3.1%) | 16 (33.9%) | 32 (80.0%) | 579 (72.0%) | 17 (39.5%) | 125 (33.2%) | 1 (1.1%) | 9 (100.0%) | 11 (30.2%) | 16 (78.0%) | 1218 (100.0%) | 0 (0.0%) | 57 (56.0%) | 9 (3.6%) |
| Albania | 3 (9.8%) | 3 (40.1%) | 10 (80.0%) | 204 (82.5%) | 3 (75.0%) | 20 (27.5%) | 1 (4.6%) | 0 (0.0%) | 6 (21.3%) | 13 (78.0%) | 171 (100.0%) | 0 (0.0%) | 10 (36.0%) | 2 (5.5%) |
| Algeria | 5 (4.4%) | 4 (22.0%) | 399 (80.0%) | 919 (84.2%) | 29 (38.7%) | 75 (22.7%) | 1 (1.1%) | 18 (100.0%) | 23 (24.1%) | 38 (78.0%) | 1799 (100.0%) | 0 (0.0%) | 362 (74.0%) | 84 (9.0%) |
| Angola | 11 (3.8%) | 14 (22.0%) | 6 (80.0%) | 309 (83.0%) | 7 (43.8%) | 259 (61.4%) | 1 (1.1%) | 221 (100.0%) | 30 (33.8%) | 64 (78.0%) | 2823 (100.0%) | 112 (39.7%) | 81 (74.0%) | 77 (26.0%) |
| Argentina | 20 (4.6%) | 26 (22.9%) | 34 (80.0%) | 1327 (83.5%) | 123 (64.7%) | 129 (13.4%) | 2 (1.1%) | 33 (100.0%) | 71 (20.6%) | 83 (78.0%) | 4696 (100.0%) | 0 (0.0%) | 191 (60.0%) | 82 (4.5%) |
| Armenia | 1 (7.0%) | 0 (0.0%) | 2 (80.0%) | 187 (74.8%) | 2 (33.3%) | 93 (40.7%) | 0 (1.1%) | 0 (0.0%) | 3 (17.3%) | 6 (78.0%) | 156 (100.0%) | 0 (0.0%) | 12 (56.0%) | 8 (15.1%) |
| Australia | 180 (19.3%) | 92 (56.9%) | 38 (80.0%) | 766 (70.7%) | 315 (82.0%) | 275 (31.4%) | 3 (4.6%) | 15 (100.0%) | 93 (22.8%) | 81 (78.0%) | 898 (100.0%) | 0 (0.0%) | 78 (29.0%) | 96 (3.8%) |
| Austria | 24 (11.4%) | 36 (40.1%) | 10 (80.0%) | 377 (79.4%) | 106 (79.7%) | 75 (25.3%) | 2 (4.6%) | 2 (100.0%) | 35 (19.8%) | 30 (78.0%) | 409 (100.0%) | 0 (0.0%) | 26 (36.0%) | 33 (4.6%) |
| Azerbaijan | 5 (7.5%) | 4 (33.9%) | 15 (80.0%) | 442 (75.0%) | 15 (39.5%) | 143 (40.5%) | 1 (1.1%) | 24 (100.0%) | 7 (38.4%) | 2 (78.0%) | 547 (100.0%) | 0 (0.0%) | 55 (56.0%) | 27 (14.5%) |
| Bahamas | 0 (0.0%) | 0 (33.9%) | 0 (0.0%) | 12 (83.1%) | 2 (100.0%) | 1 (16.8%) | 0 (1.1%) | 0 (0.0%) | 0 (0.0%) | 2 (78.0%) | 42 (100.0%) | 0 (0.0%) | 3 (60.0%) | 1 (7.3%) |
| Bahrain | 0 (5.4%) | 0 (33.9%) | 2 (80.0%) | 12 (77.9%) | 0 (0.0%) | 3 (23.1%) | 0 (1.1%) | 0 (0.0%) | 0 (28.0%) | 0 (0.0%) | 18 (100.0%) | 0 (0.0%) | 3 (56.0%) | 4 (15.3%) |
| Bangladesh | 168 (3.2%) | 225 (33.9%) | 224 (80.0%) | 1979 (72.9%) | 49 (42.6%) | 246 (28.8%) | 8 (1.1%) | 0 (0.0%) | 91 (31.8%) | 186 (78.0%) | 9640 (100.0%) | 0 (0.0%) | 87 (56.0%) | 38 (3.8%) |
| Barbados | 0 (5.4%) | 0 (33.9%) | 0 (0.0%) | 8 (80.1%) | 4 (66.7%) | 1 (14.3%) | 0 (0.0%) | 0 (0.0%) | 1 (41.3%) | 0 (0.0%) | 36 (100.0%) | 0 (0.0%) | 0 (0.0%) | 1 (4.5%) |
| Belarus | 23 (14.5%) | 14 (40.1%) | 6 (80.0%) | 907 (84.1%) | 63 (77.8%) | 45 (23.8%) | 1 (4.6%) | 9 (100.0%) | 34 (19.9%) | 19 (78.0%) | 668 (100.0%) | 0 (0.0%) | 46 (36.0%) | 60 (11.6%) |
| Belgium | 34 (9.1%) | 57 (40.1%) | 13 (80.0%) | 370 (71.6%) | 117 (81.8%) | 97 (22.7%) | 3 (4.6%) | 11 (100.0%) | 59 (22.3%) | 41 (78.0%) | 531 (100.0%) | 0 (0.0%) | 59 (36.0%) | 67 (5.8%) |
| Belize | 0 (0.0%) | 0 (40.1%) | 0 (0.0%) | 6 (89.0%) | 0 (0.0%) | 2 (16.7%) | 0 (0.0%) | 0 (0.0%) | 0 (0.0%) | 0 (0.0%) | 34 (100.0%) | 0 (0.0%) | 0 (0.0%) | 0 (1.7%) |
| Benin | 2 (3.8%) | 4 (22.0%) | 25 (80.0%) | 117 (85.8%) | 5 (38.5%) | 134 (67.0%) | 0 (1.1%) | 8 (100.0%) | 11 (30.2%) | 10 (78.0%) | 701 (100.0%) | 4 (36.4%) | 10 (74.0%) | 22 (25.9%) |
| Bhutan | 0 (1.4%) | 1 (33.9%) | 2 (80.0%) | 27 (72.2%) | 0 (0.0%) | 3 (36.9%) | 0 (1.1%) | 0 (0.0%) | 0 (0.0%) | 0 (0.0%) | 49 (100.0%) | 0 (0.0%) | 0 (0.0%) | 0 (1.7%) |
| Bolivia | 1 (4.7%) | 7 (22.9%) | 0 (0.0%) | 403 (83.5%) | 5 (83.3%) | 86 (17.6%) | 0 (1.1%) | 0 (0.0%) | 6 (20.8%) | 22 (78.0%) | 2213 (100.0%) | 0 (0.0%) | 23 (60.0%) | 10 (6.9%) |
| Bosnia Herzegovina | 5 (17.7%) | 4 (40.1%) | 2 (80.0%) | 206 (82.6%) | 3 (60.0%) | 60 (27.6%) | 2 (4.6%) | 0 (0.0%) | 7 (20.4%) | 11 (78.0%) | 263 (100.0%) | 0 (0.0%) | 19 (36.0%) | 5 (5.5%) |
| Botswana | 0 (2.7%) | 0 (22.0%) | 2 (80.0%) | 7 (79.1%) | 9 (75.0%) | 7 (44.1%) | 0 (1.1%) | 98 (100.0%) | 15 (42.9%) | 5 (78.0%) | 454 (100.0%) | 1 (11.1%) | 10 (74.0%) | 3 (6.9%) |
| Brazil | 149 (5.4%) | 203 (22.9%) | 210 (80.0%) | 6960 (83.6%) | 1582 (76.7%) | 1455 (25.7%) | 18 (1.1%) | 133 (100.0%) | 311 (21.7%) | 360 (78.0%) | 18715 (100.0%) | 0 (0.0%) | 700 (60.0%) | 278 (5.6%) |
| Brunei Darussalam | 0 (1.4%) | 0 (0.0%) | 8 (80.0%) | 19 (85.0%) | 0 (0.0%) | 5 (47.4%) | 0 (0.0%) | 0 (0.0%) | 0 (0.0%) | 0 (0.0%) | 53 (100.0%) | 0 (0.0%) | 1 (56.0%) | 1 (5.3%) |
| Bulgaria | 22 (18.0%) | 9 (40.1%) | 23 (80.0%) | 463 (79.9%) | 27 (71.1%) | 96 (34.5%) | 2 (4.6%) | 2 (100.0%) | 22 (19.9%) | 27 (78.0%) | 877 (100.0%) | 0 (0.0%) | 18 (36.0%) | 25 (11.3%) |
| Burkina Faso | 3 (3.8%) | 0 (0.0%) | 0 (0.0%) | 193 (83.6%) | 48 (51.1%) | 529 (64.5%) | 0 (1.1%) | 49 (100.0%) | 20 (48.0%) | 23 (78.0%) | 988 (100.0%) | 180 (33.8%) | 16 (74.0%) | 48 (25.6%) |
| Burundi | 1 (3.9%) | 1 (22.0%) | 22 (80.0%) | 101 (83.1%) | 8 (32.0%) | 85 (61.2%) | 0 (1.1%) | 159 (100.0%) | 21 (42.0%) | 11 (78.0%) | 1457 (100.0%) | 17 (33.3%) | 24 (74.0%) | 34 (19.5%) |
| Cambodia | 15 (5.5%) | 10 (33.9%) | 67 (80.0%) | 214 (85.1%) | 6 (35.3%) | 559 (50.6%) | 0 (1.1%) | 1 (100.0%) | 15 (37.8%) | 8 (78.0%) | 1274 (100.0%) | 0 (0.0%) | 16 (56.0%) | 12 (4.0%) |
| Cameroon | 3 (3.7%) | 6 (22.0%) | 109 (80.0%) | 213 (83.1%) | 20 (37.7%) | 171 (69.9%) | 0 (1.1%) | 351 (100.0%) | 16 (27.7%) | 37 (78.0%) | 2525 (100.0%) | 21 (32.3%) | 29 (74.0%) | 249 (34.0%) |
| Canada | 178 (15.0%) | 265 (69.6%) | 72 (80.0%) | 983 (70.5%) | 522 (83.8%) | 527 (30.0%) | 6 (4.6%) | 17 (100.0%) | 214 (22.3%) | 178 (78.0%) | 1730 (100.0%) | 0 (0.0%) | 149 (32.0%) | 171 (4.0%) |
| Cape Verde | 0 (3.9%) | 0 (0.0%) | 0 (0.0%) | 6 (89.0%) | 1 (100.0%) | 1 (69.9%) | 0 (1.1%) | 1 (100.0%) | 0 (48.0%) | 0 (0.0%) | 46 (100.0%) | 1 (20.0%) | 1 (74.0%) | 1 (24.8%) |
| Central African Republic | 1 (4.1%) | 0 (0.0%) | 13 (80.0%) | 39 (83.3%) | 3 (33.3%) | 32 (60.9%) | 0 (1.1%) | 17 (100.0%) | 4 (22.4%) | 2 (78.0%) | 295 (100.0%) | 4 (30.8%) | 3 (74.0%) | 14 (25.5%) |
| Chad | 5 (3.8%) | 3 (22.0%) | 22 (80.0%) | 95 (82.8%) | 0 (0.0%) | 412 (61.1%) | 0 (1.1%) | 10 (100.0%) | 14 (48.0%) | 13 (78.0%) | 1111 (100.0%) | 37 (41.1%) | 0 (0.0%) | 12 (25.3%) |
| Chile | 8 (6.6%) | 10 (22.9%) | 11 (80.0%) | 1186 (73.9%) | 36 (54.5%) | 248 (34.0%) | 0 (1.1%) | 5 (100.0%) | 23 (18.4%) | 44 (78.0%) | 1559 (100.0%) | 0 (0.0%) | 75 (60.0%) | 62 (9.6%) |
| China | 609 (4.7%) | 499 (33.9%) | 11483 (80.0%) | 84947 (75.8%) | 440 (17.7%) | 58518 (58.7%) | 25 (1.1%) | 169 (100.0%) | 1034 (25.1%) | 2094 (78.0%) | 150659 (100.0%) | 0 (0.0%) | 951 (56.0%) | 1538 (4.4%) |
| Colombia | 15 (3.0%) | 34 (22.9%) | 48 (80.0%) | 2955 (84.4%) | 268 (70.2%) | 184 (13.8%) | 2 (1.1%) | 36 (100.0%) | 118 (29.9%) | 143 (78.0%) | 4570 (100.0%) | 0 (0.0%) | 195 (60.0%) | 116 (7.1%) |
| Comoros | 0 (0.0%) | 0 (0.0%) | 0 (0.0%) | 4 (89.0%) | 0 (0.0%) | 7 (58.7%) | 0 (0.0%) | 0 (0.0%) | 3 (44.7%) | 0 (0.0%) | 163 (100.0%) | 4 (36.4%) | 0 (0.0%) | 3 (19.6%) |
| Congo, Democratic Republic of | 8 (3.8%) | 4 (22.0%) | 166 (80.0%) | 701 (83.2%) | 92 (35.2%) | 627 (60.8%) | 1 (1.1%) | 27 (100.0%) | 117 (35.4%) | 92 (78.0%) | 8705 (100.0%) | 83 (31.1%) | 91 (74.0%) | 222 (25.8%) |
| Congo, Republic of | 0 (3.1%) | 0 (22.0%) | 6 (80.0%) | 45 (82.4%) | 11 (73.3%) | 19 (23.4%) | 0 (1.1%) | 4 (100.0%) | 6 (25.0%) | 4 (78.0%) | 397 (100.0%) | 7 (63.6%) | 1 (74.0%) | 5 (26.5%) |
| Costa Rica | 1 (2.9%) | 2 (22.9%) | 2 (80.0%) | 316 (83.6%) | 5 (50.0%) | 30 (16.5%) | 0 (1.1%) | 2 (100.0%) | 6 (19.4%) | 8 (78.0%) | 341 (100.0%) | 0 (0.0%) | 32 (60.0%) | 11 (7.0%) |
| Croatia | 11 (13.6%) | 8 (40.1%) | 4 (80.0%) | 335 (81.6%) | 13 (56.5%) | 42 (23.4%) | 1 (4.6%) | 2 (100.0%) | 20 (19.3%) | 16 (78.0%) | 272 (100.0%) | 0 (0.0%) | 18 (36.0%) | 10 (2.5%) |
| Cuba | 21 (7.8%) | 15 (22.9%) | 25 (80.0%) | 455 (83.3%) | 112 (76.7%) | 71 (15.2%) | 3 (1.1%) | 5 (100.0%) | 29 (26.3%) | 51 (78.0%) | 1122 (100.0%) | 0 (0.0%) | 71 (60.0%) | 24 (4.0%) |
| Cyprus | 1 (8.3%) | 1 (40.1%) | 1 (80.0%) | 40 (78.5%) | 6 (85.7%) | 11 (22.6%) | 0 (4.6%) | 1 (100.0%) | 3 (21.1%) | 0 (0.0%) | 62 (100.0%) | 0 (0.0%) | 5 (36.0%) | 6 (6.2%) |
| Czechia | 42 (12.0%) | 70 (40.1%) | 11 (80.0%) | 404 (79.9%) | 124 (79.5%) | 33 (8.4%) | 2 (4.6%) | 5 (100.0%) | 55 (20.2%) | 48 (78.0%) | 658 (100.0%) | 0 (0.0%) | 43 (36.0%) | 118 (13.7%) |
| C�te d'Ivoire | 4 (3.8%) | 4 (22.0%) | 41 (80.0%) | 263 (83.1%) | 36 (66.7%) | 303 (74.4%) | 0 (1.1%) | 100 (100.0%) | 13 (39.2%) | 46 (78.0%) | 2360 (100.0%) | 12 (23.1%) | 35 (74.0%) | 174 (39.8%) |
| Denmark | 11 (7.1%) | 50 (40.1%) | 5 (80.0%) | 159 (62.7%) | 115 (89.8%) | 25 (10.4%) | 2 (4.6%) | 0 (0.0%) | 44 (22.3%) | 17 (78.0%) | 373 (100.0%) | 0 (0.0%) | 26 (36.0%) | 22 (2.8%) |
| Djibouti | 0 (3.6%) | 0 (0.0%) | 0 (0.0%) | 10 (81.6%) | 0 (0.0%) | 5 (61.6%) | 0 (0.0%) | 0 (0.0%) | 1 (19.3%) | 1 (78.0%) | 71 (100.0%) | 1 (25.0%) | 0 (0.0%) | 3 (22.5%) |
| Dominican Republic | 5 (6.9%) | 9 (22.9%) | 10 (80.0%) | 294 (83.4%) | 8 (72.7%) | 64 (16.1%) | 1 (1.1%) | 26 (100.0%) | 2 (21.6%) | 44 (78.0%) | 967 (100.0%) | 0 (0.0%) | 65 (60.0%) | 7 (5.1%) |
| Ecuador | 3 (2.7%) | 7 (22.9%) | 13 (80.0%) | 989 (87.0%) | 72 (77.4%) | 110 (19.2%) | 0 (1.1%) | 10 (100.0%) | 14 (19.0%) | 23 (78.0%) | 1792 (100.0%) | 0 (0.0%) | 65 (60.0%) | 60 (8.6%) |
| Egypt | 46 (5.2%) | 17 (22.0%) | 54 (80.0%) | 1303 (78.5%) | 5 (4.3%) | 8314 (81.6%) | 2 (1.1%) | 13 (100.0%) | 51 (20.2%) | 74 (78.0%) | 1302 (100.0%) | 756 (28.2%) | 431 (74.0%) | 1102 (26.5%) |
| El Salvador | 4 (6.9%) | 1 (22.9%) | 3 (80.0%) | 286 (83.3%) | 14 (73.7%) | 42 (15.9%) | 0 (1.1%) | 0 (0.0%) | 5 (18.5%) | 8 (78.0%) | 627 (100.0%) | 0 (0.0%) | 19 (60.0%) | 5 (5.2%) |
| Equatorial Guinea | 0 (4.4%) | 0 (22.0%) | 0 (0.0%) | 8 (80.1%) | 1 (50.0%) | 10 (61.3%) | 0 (0.0%) | 13 (100.0%) | 0 (0.0%) | 1 (78.0%) | 127 (100.0%) | 0 (0.0%) | 1 (74.0%) | 7 (27.5%) |
| Eritrea | 1 (3.8%) | 0 (0.0%) | 10 (80.0%) | 34 (82.5%) | 2 (66.7%) | 25 (61.4%) | 0 (1.1%) | 0 (0.0%) | 5 (29.8%) | 4 (78.0%) | 196 (100.0%) | 5 (27.8%) | 4 (74.0%) | 9 (20.2%) |
| Estonia | 4 (11.6%) | 3 (40.1%) | 1 (80.0%) | 159 (80.5%) | 9 (81.8%) | 4 (8.4%) | 0 (4.6%) | 0 (0.0%) | 6 (17.2%) | 4 (78.0%) | 121 (100.0%) | 0 (0.0%) | 6 (36.0%) | 5 (3.8%) |
| Eswatini | 0 (1.4%) | 0 (0.0%) | 0 (0.0%) | 2 (89.0%) | 3 (50.0%) | 8 (59.4%) | 0 (0.0%) | 35 (100.0%) | 11 (44.1%) | 2 (78.0%) | 417 (100.0%) | 2 (50.0%) | 2 (74.0%) | 3 (22.5%) |
| Ethiopia | 20 (3.7%) | 8 (22.0%) | 239 (80.0%) | 1030 (82.9%) | 83 (44.9%) | 578 (50.3%) | 1 (1.1%) | 49 (100.0%) | 183 (37.8%) | 172 (78.0%) | 8168 (100.0%) | 190 (35.8%) | 161 (74.0%) | 267 (19.2%) |
| Fiji | 2 (15.2%) | 1 (56.9%) | 0 (0.0%) | 11 (71.2%) | 4 (80.0%) | 8 (30.4%) | 0 (1.1%) | 0 (0.0%) | 0 (0.0%) | 2 (78.0%) | 165 (100.0%) | 0 (0.0%) | 2 (29.0%) | 0 (1.6%) |
| Finland | 22 (10.0%) | 13 (40.1%) | 5 (80.0%) | 190 (77.4%) | 25 (75.8%) | 27 (12.0%) | 1 (4.6%) | 3 (100.0%) | 27 (19.4%) | 18 (78.0%) | 179 (100.0%) | 0 (0.0%) | 26 (36.0%) | 42 (6.1%) |
| France (metropolitan) | 232 (9.4%) | 394 (40.1%) | 76 (80.0%) | 1954 (73.9%) | 1319 (95.1%) | 741 (21.4%) | 21 (4.6%) | 33 (100.0%) | 211 (19.5%) | 192 (78.0%) | 3185 (100.0%) | 0 (0.0%) | 266 (36.0%) | 316 (4.4%) |
| France, Guadeloupe | 0 (7.7%) | 0 (22.9%) | 0 (0.0%) | 45 (82.4%) | 2 (66.7%) | 2 (16.9%) | 0 (0.0%) | 0 (0.0%) | 1 (15.0%) | 0 (0.0%) | 32 (100.0%) | 0 (0.0%) | 1 (60.0%) | 2 (9.3%) |
| France, La R�union | 1 (4.9%) | 1 (22.0%) | 0 (0.0%) | 49 (85.9%) | 8 (88.9%) | 15 (36.0%) | 0 (1.1%) | 0 (0.0%) | 2 (21.6%) | 0 (0.0%) | 75 (100.0%) | 1 (5.9%) | 2 (74.0%) | 7 (21.0%) |
| France, Martinique | 0 (9.3%) | 0 (0.0%) | 0 (0.0%) | 41 (80.3%) | 4 (80.0%) | 4 (21.8%) | 0 (0.0%) | 0 (0.0%) | 0 (0.0%) | 2 (78.0%) | 29 (100.0%) | 0 (0.0%) | 0 (0.0%) | 1 (5.3%) |
| French Guyana | 0 (0.0%) | 0 (0.0%) | 0 (0.0%) | 6 (77.9%) | 1 (100.0%) | 0 (0.0%) | 0 (0.0%) | 0 (0.0%) | 0 (0.0%) | 0 (0.0%) | 19 (100.0%) | 0 (0.0%) | 0 (0.0%) | 1 (8.3%) |
| French Polynesia | 0 (11.8%) | 0 (0.0%) | 1 (80.0%) | 9 (80.9%) | 1 (100.0%) | 4 (43.3%) | 0 (0.0%) | 0 (0.0%) | 0 (0.0%) | 0 (0.0%) | 15 (100.0%) | 0 (0.0%) | 0 (0.0%) | 0 (1.7%) |
| Gabon | 0 (3.6%) | 1 (22.0%) | 3 (80.0%) | 10 (81.6%) | 4 (66.7%) | 40 (65.9%) | 0 (1.1%) | 19 (100.0%) | 1 (48.0%) | 3 (78.0%) | 271 (100.0%) | 3 (30.0%) | 2 (74.0%) | 8 (21.2%) |
| Gaza Strip and West Bank | 1 (7.0%) | 0 (0.0%) | 2 (80.0%) | 46 (75.9%) | 0 (0.0%) | 25 (40.9%) | 0 (1.1%) | 3 (100.0%) | 1 (26.8%) | 2 (78.0%) | 59 (100.0%) | 0 (0.0%) | 31 (56.0%) | 17 (14.6%) |
| Georgia | 4 (8.2%) | 2 (33.9%) | 10 (80.0%) | 237 (74.4%) | 3 (37.5%) | 60 (40.6%) | 0 (1.1%) | 1 (100.0%) | 11 (17.5%) | 12 (78.0%) | 330 (100.0%) | 0 (0.0%) | 23 (56.0%) | 21 (15.1%) |
| Germany | 210 (9.9%) | 492 (40.1%) | 101 (80.0%) | 4306 (75.0%) | 1370 (89.0%) | 670 (20.5%) | 25 (4.6%) | 31 (100.0%) | 947 (20.4%) | 462 (78.0%) | 4544 (100.0%) | 0 (0.0%) | 282 (36.0%) | 537 (6.3%) |
| Ghana | 2 (3.8%) | 5 (22.0%) | 55 (80.0%) | 360 (83.0%) | 54 (41.2%) | 737 (68.5%) | 1 (1.1%) | 45 (100.0%) | 23 (32.6%) | 17 (78.0%) | 3072 (100.0%) | 121 (46.2%) | 56 (74.0%) | 154 (26.2%) |
| Greece | 26 (10.1%) | 6 (40.1%) | 32 (80.0%) | 575 (82.5%) | 55 (71.4%) | 217 (38.0%) | 3 (4.6%) | 8 (100.0%) | 33 (16.1%) | 13 (78.0%) | 473 (100.0%) | 0 (0.0%) | 33 (36.0%) | 38 (5.9%) |
| Guam | 0 (1.4%) | 0 (0.0%) | 0 (0.0%) | 5 (76.3%) | 0 (0.0%) | 3 (44.9%) | 0 (0.0%) | 0 (0.0%) | 0 (0.0%) | 0 (0.0%) | 19 (100.0%) | 0 (0.0%) | 0 (0.0%) | 0 (1.7%) |
| Guatemala | 6 (6.9%) | 5 (22.9%) | 4 (80.0%) | 868 (83.4%) | 4 (66.7%) | 180 (15.8%) | 0 (1.1%) | 0 (0.0%) | 4 (25.8%) | 12 (78.0%) | 1761 (100.0%) | 0 (0.0%) | 28 (60.0%) | 9 (5.4%) |
| Guinea | 1 (3.8%) | 1 (22.0%) | 2 (80.0%) | 119 (82.8%) | 5 (33.3%) | 396 (61.3%) | 0 (1.1%) | 14 (100.0%) | 5 (29.8%) | 17 (78.0%) | 2551 (100.0%) | 2 (11.1%) | 21 (74.0%) | 34 (25.8%) |
| Guinea-Bissau | 0 (4.4%) | 0 (0.0%) | 0 (0.0%) | 20 (81.9%) | 0 (0.0%) | 39 (60.2%) | 0 (0.0%) | 2 (100.0%) | 0 (15.0%) | 1 (78.0%) | 224 (100.0%) | 3 (33.3%) | 1 (74.0%) | 5 (28.9%) |
| Guyana | 0 (1.4%) | 0 (0.0%) | 1 (80.0%) | 14 (83.8%) | 1 (100.0%) | 3 (17.9%) | 0 (0.0%) | 0 (0.0%) | 1 (37.0%) | 0 (0.0%) | 129 (100.0%) | 0 (0.0%) | 0 (0.0%) | 1 (6.0%) |
| Haiti | 2 (7.0%) | 8 (22.9%) | 4 (80.0%) | 297 (83.3%) | 6 (75.0%) | 68 (15.7%) | 0 (1.1%) | 7 (100.0%) | 0 (15.0%) | 18 (78.0%) | 869 (100.0%) | 0 (0.0%) | 23 (60.0%) | 8 (4.9%) |
| Honduras | 2 (6.7%) | 1 (22.9%) | 5 (80.0%) | 183 (83.3%) | 20 (74.1%) | 26 (15.9%) | 0 (1.1%) | 4 (100.0%) | 7 (25.2%) | 15 (78.0%) | 916 (100.0%) | 0 (0.0%) | 49 (60.0%) | 13 (5.0%) |
| Hungary | 41 (13.3%) | 62 (40.1%) | 17 (80.0%) | 570 (77.8%) | 21 (63.6%) | 122 (38.3%) | 6 (4.6%) | 4 (100.0%) | 44 (17.4%) | 55 (78.0%) | 964 (100.0%) | 0 (0.0%) | 45 (36.0%) | 74 (11.5%) |
| Iceland | 1 (8.6%) | 0 (0.0%) | 0 (0.0%) | 11 (82.2%) | 2 (66.7%) | 1 (9.5%) | 0 (4.6%) | 0 (0.0%) | 1 (16.6%) | 1 (78.0%) | 19 (100.0%) | 0 (0.0%) | 2 (36.0%) | 2 (6.5%) |
| India | 1137 (3.2%) | 1229 (33.9%) | 1795 (80.0%) | 15594 (72.4%) | 979 (43.6%) | 2645 (23.3%) | 48 (1.1%) | 25 (100.0%) | 847 (27.2%) | 3900 (78.0%) | 127526 (100.0%) | 0 (0.0%) | 2089 (56.0%) | 500 (3.4%) |
| Indonesia | 134 (5.4%) | 141 (33.9%) | 3470 (80.0%) | 690 (84.9%) | 103 (34.4%) | 2617 (47.7%) | 3 (1.1%) | 29 (100.0%) | 378 (28.9%) | 360 (78.0%) | 36964 (100.0%) | 0 (0.0%) | 214 (56.0%) | 248 (4.2%) |
| Iran, Islamic Republic of | 46 (8.1%) | 18 (33.9%) | 76 (80.0%) | 4155 (65.0%) | 26 (26.0%) | 592 (22.3%) | 6 (1.1%) | 47 (100.0%) | 14 (28.4%) | 43 (78.0%) | 1265 (100.0%) | 0 (0.0%) | 277 (56.0%) | 79 (6.1%) |
| Iraq | 11 (7.2%) | 1 (33.9%) | 30 (80.0%) | 438 (75.4%) | 7 (38.9%) | 160 (40.6%) | 1 (1.1%) | 20 (100.0%) | 8 (27.2%) | 15 (78.0%) | 311 (100.0%) | 0 (0.0%) | 234 (56.0%) | 144 (14.5%) |
| Ireland | 7 (8.4%) | 12 (40.1%) | 3 (80.0%) | 115 (63.4%) | 29 (72.5%) | 16 (7.1%) | 2 (4.6%) | 0 (0.0%) | 17 (23.7%) | 10 (78.0%) | 242 (100.0%) | 0 (0.0%) | 27 (36.0%) | 21 (4.6%) |
| Israel | 6 (5.0%) | 2 (33.9%) | 13 (80.0%) | 270 (79.3%) | 11 (64.7%) | 55 (33.2%) | 0 (1.1%) | 47 (100.0%) | 15 (20.6%) | 16 (78.0%) | 330 (100.0%) | 0 (0.0%) | 66 (56.0%) | 97 (14.0%) |
| Italy | 157 (7.9%) | 191 (40.1%) | 118 (80.0%) | 4807 (83.3%) | 631 (71.9%) | 1795 (47.2%) | 28 (4.6%) | 216 (100.0%) | 311 (18.0%) | 218 (78.0%) | 2479 (100.0%) | 0 (0.0%) | 348 (36.0%) | 914 (13.3%) |
| Jamaica | 1 (6.4%) | 1 (22.9%) | 9 (80.0%) | 72 (83.8%) | 3 (30.0%) | 9 (15.6%) | 0 (1.1%) | 0 (0.0%) | 2 (32.9%) | 5 (78.0%) | 376 (100.0%) | 0 (0.0%) | 7 (60.0%) | 5 (5.2%) |
| Japan | 236 (5.2%) | 154 (33.9%) | 176 (80.0%) | 36516 (85.6%) | 223 (44.5%) | 7256 (57.1%) | 16 (4.6%) | 5 (100.0%) | 236 (17.6%) | 295 (78.0%) | 10958 (100.0%) | 0 (0.0%) | 285 (56.0%) | 1360 (8.2%) |
| Jordan | 4 (10.9%) | 1 (33.9%) | 21 (80.0%) | 108 (81.0%) | 3 (33.3%) | 26 (30.3%) | 0 (1.1%) | 3 (100.0%) | 3 (28.2%) | 9 (78.0%) | 133 (100.0%) | 0 (0.0%) | 57 (56.0%) | 37 (15.6%) |
| Kazakhstan | 19 (11.4%) | 13 (33.9%) | 26 (80.0%) | 925 (75.3%) | 16 (48.5%) | 203 (41.9%) | 0 (1.1%) | 7 (100.0%) | 29 (22.7%) | 40 (78.0%) | 1824 (100.0%) | 0 (0.0%) | 37 (56.0%) | 12 (4.7%) |
| Kenya | 10 (2.7%) | 5 (22.0%) | 250 (80.0%) | 851 (83.2%) | 66 (37.3%) | 217 (52.1%) | 0 (1.1%) | 303 (100.0%) | 57 (34.8%) | 46 (78.0%) | 5845 (100.0%) | 18 (8.6%) | 125 (74.0%) | 74 (9.0%) |
| Korea, Democratic People Republic of | 5 (4.0%) | 4 (33.9%) | 84 (80.0%) | 1520 (82.4%) | 6 (25.0%) | 1097 (54.1%) | 1 (1.1%) | 3 (100.0%) | 16 (28.0%) | 23 (78.0%) | 2153 (100.0%) | 0 (0.0%) | 35 (56.0%) | 20 (5.9%) |
| Korea, Republic of | 34 (6.1%) | 26 (33.9%) | 81 (80.0%) | 8359 (87.0%) | 147 (63.1%) | 1927 (55.0%) | 3 (4.6%) | 12 (100.0%) | 48 (23.4%) | 74 (78.0%) | 3397 (100.0%) | 0 (0.0%) | 78 (56.0%) | 356 (15.9%) |
| Kuwait | 1 (3.8%) | 0 (0.0%) | 11 (80.0%) | 23 (74.6%) | 2 (66.7%) | 15 (44.3%) | 0 (1.1%) | 0 (0.0%) | 1 (28.0%) | 0 (0.0%) | 61 (100.0%) | 0 (0.0%) | 15 (56.0%) | 15 (13.9%) |
| Kyrgyzstan | 1 (3.4%) | 2 (33.9%) | 10 (80.0%) | 209 (71.6%) | 4 (44.4%) | 56 (35.4%) | 0 (1.1%) | 4 (100.0%) | 9 (27.0%) | 7 (78.0%) | 479 (100.0%) | 0 (0.0%) | 13 (56.0%) | 2 (4.4%) |
| Lao People's Democratic Republic | 5 (5.4%) | 3 (33.9%) | 68 (80.0%) | 206 (85.0%) | 2 (28.6%) | 204 (50.2%) | 0 (1.1%) | 0 (0.0%) | 6 (31.3%) | 6 (78.0%) | 401 (100.0%) | 0 (0.0%) | 7 (56.0%) | 5 (4.4%) |
| Latvia | 5 (13.4%) | 7 (40.1%) | 1 (80.0%) | 174 (83.4%) | 12 (63.2%) | 8 (11.3%) | 0 (4.6%) | 0 (0.0%) | 10 (19.0%) | 10 (78.0%) | 238 (100.0%) | 0 (0.0%) | 8 (36.0%) | 4 (3.1%) |
| Lebanon | 1 (2.9%) | 1 (33.9%) | 9 (80.0%) | 62 (75.1%) | 7 (70.0%) | 14 (17.7%) | 0 (1.1%) | 2 (100.0%) | 11 (22.9%) | 9 (78.0%) | 144 (100.0%) | 0 (0.0%) | 53 (56.0%) | 47 (15.7%) |
| Lesotho | 0 (3.1%) | 0 (0.0%) | 0 (0.0%) | 12 (83.1%) | 3 (60.0%) | 12 (59.4%) | 0 (0.0%) | 48 (100.0%) | 11 (41.1%) | 2 (78.0%) | 598 (100.0%) | 6 (35.3%) | 3 (74.0%) | 4 (22.2%) |
| Liberia | 1 (3.8%) | 0 (22.0%) | 2 (80.0%) | 55 (83.6%) | 3 (50.0%) | 115 (61.3%) | 0 (1.1%) | 11 (100.0%) | 1 (34.7%) | 8 (78.0%) | 717 (100.0%) | 4 (40.0%) | 7 (74.0%) | 17 (26.4%) |
| Libya | 2 (4.9%) | 1 (22.0%) | 38 (80.0%) | 92 (81.1%) | 2 (33.3%) | 63 (65.8%) | 0 (1.1%) | 3 (100.0%) | 2 (17.8%) | 7 (78.0%) | 278 (100.0%) | 0 (0.0%) | 53 (74.0%) | 12 (8.2%) |
| Lithuania | 6 (12.1%) | 5 (40.1%) | 3 (80.0%) | 253 (85.1%) | 18 (78.3%) | 9 (9.0%) | 1 (4.6%) | 3 (100.0%) | 8 (18.4%) | 10 (78.0%) | 296 (100.0%) | 0 (0.0%) | 7 (36.0%) | 14 (9.3%) |
| Luxembourg | 1 (9.0%) | 1 (40.1%) | 0 (0.0%) | 25 (75.5%) | 2 (100.0%) | 5 (24.9%) | 0 (4.6%) | 0 (0.0%) | 3 (26.2%) | 2 (78.0%) | 22 (100.0%) | 0 (0.0%) | 3 (36.0%) | 2 (5.8%) |
| Madagascar | 3 (3.8%) | 3 (22.0%) | 34 (80.0%) | 240 (83.1%) | 43 (34.1%) | 280 (62.0%) | 0 (1.1%) | 0 (0.0%) | 88 (42.8%) | 42 (78.0%) | 4060 (100.0%) | 122 (33.4%) | 33 (74.0%) | 81 (19.2%) |
| Malawi | 3 (3.4%) | 0 (0.0%) | 20 (80.0%) | 110 (83.0%) | 49 (67.1%) | 115 (62.1%) | 0 (1.1%) | 691 (100.0%) | 42 (45.1%) | 66 (78.0%) | 4701 (100.0%) | 288 (72.7%) | 34 (74.0%) | 298 (54.1%) |
| Malaysia | 16 (4.2%) | 12 (33.9%) | 408 (80.0%) | 428 (84.9%) | 19 (25.7%) | 295 (46.7%) | 1 (1.1%) | 1 (100.0%) | 15 (27.8%) | 38 (78.0%) | 1913 (100.0%) | 0 (0.0%) | 52 (56.0%) | 37 (4.0%) |
| Maldives | 0 (0.0%) | 0 (0.0%) | 7 (100.0%) | 0 (0.0%) | 0 (0.0%) | 2 (32.7%) | 0 (0.0%) | 0 (0.0%) | 0 (0.0%) | 0 (0.0%) | 51 (100.0%) | 0 (0.0%) | 0 (0.0%) | 0 (1.7%) |
| Mali | 5 (3.5%) | 4 (22.0%) | 11 (80.0%) | 526 (83.0%) | 11 (34.4%) | 205 (63.6%) | 0 (1.1%) | 43 (100.0%) | 15 (32.6%) | 29 (78.0%) | 2436 (100.0%) | 151 (43.3%) | 33 (74.0%) | 39 (27.1%) |
| Malta | 1 (7.0%) | 0 (0.0%) | 0 (0.0%) | 19 (74.8%) | 1 (50.0%) | 2 (18.4%) | 0 (4.6%) | 1 (100.0%) | 2 (17.6%) | 2 (78.0%) | 13 (100.0%) | 0 (0.0%) | 3 (36.0%) | 3 (5.8%) |
| Mauritania | 1 (3.9%) | 0 (22.0%) | 3 (80.0%) | 61 (82.9%) | 4 (40.0%) | 72 (61.5%) | 0 (1.1%) | 10 (100.0%) | 4 (29.7%) | 6 (78.0%) | 468 (100.0%) | 10 (35.7%) | 7 (74.0%) | 8 (19.6%) |
| Mauritius | 1 (5.3%) | 0 (22.0%) | 0 (0.0%) | 41 (83.6%) | 0 (0.0%) | 8 (27.6%) | 0 (1.1%) | 0 (0.0%) | 2 (20.9%) | 4 (78.0%) | 136 (100.0%) | 1 (5.6%) | 5 (74.0%) | 3 (19.6%) |
| Mexico | 52 (6.8%) | 30 (22.9%) | 43 (80.0%) | 3734 (83.4%) | 143 (74.5%) | 665 (15.3%) | 2 (1.1%) | 70 (100.0%) | 105 (22.2%) | 192 (78.0%) | 10348 (100.0%) | 0 (0.0%) | 571 (60.0%) | 196 (5.1%) |
| Moldova | 4 (14.7%) | 3 (40.1%) | 10 (80.0%) | 185 (78.1%) | 6 (75.0%) | 77 (37.0%) | 0 (4.6%) | 0 (0.0%) | 8 (17.7%) | 2 (78.0%) | 420 (100.0%) | 0 (0.0%) | 12 (36.0%) | 16 (11.3%) |
| Mongolia | 1 (4.1%) | 1 (33.9%) | 6 (80.0%) | 280 (82.6%) | 1 (50.0%) | 738 (60.3%) | 0 (1.1%) | 0 (0.0%) | 1 (22.7%) | 8 (78.0%) | 361 (100.0%) | 0 (0.0%) | 3 (56.0%) | 3 (11.9%) |
[truncated: 96,771 more chars]
